# Supplementary material for: Dynamic savanna burning emission factors based on satellite data using a machine learning approach
Source: Copernicus journal article supplement (doi:10.5194/esd-14-1039-2023), 2023-10-10
Supplement: Supplementary file 1 [file EF_Database_vernooij_revised.xlsx]

## Sheet: Sample data
	field entry					coordinates			Measurements (ppm)				Emissions (ppm)				Emission Factors (g/kg DM)					Fuel load measurements										Laboratory subsample analysis													Satellite and spatial reanalysis data
Sample	Fire	Sample_DT (local time)	Temperature	Humidity	VPD_Drone (mbar)	Latitude	Longitude	Country	CO2_abs	CH4_abs	CO_abs	N2O_abs	CO2_em	CH4_em	CO_em	N2O_em	CO2_ef	CH4_ef	CO_ef	N2O_ef	MCE	DW_grass	DW_litter	DW_coarse	perc_grass_FDM	Tot_fine_fuel	Trees/ha	avg height	avg DBH	avg health	FF_CC	MC_grass	MC_litter	MC_coarse	MC_avg	Ccont_grass	Ccont_litter	Ccont_coarse	avg C content	Ncont_grass	Ncont_litter	Ncont_coarse	avg N content	N/C ratio	LB_year_MOD	TSLF_MOD	ERA5_L_MAR	RF_6months	RF_12months
NIA_EDS19_cal1	NIA_EDS19_1	calibration						Mozambique	4580.22	14.8975	108.59	1.18163	4131.76	13.0851	108.084	0.821185	1580.32	1.82434	26.3104	0.314108	0.974508
NIA_EDS19_1A	NIA_EDS19_1	2019-06-21 16:05:34	33.78	24.98	39.4094	-12.1551	37.5666	Mozambique	1261.01	3.24234	53.6324	0.414701	812.545	1.42996	53.127	0.0542532	1525.66	0.978715	63.4869	0.101875	0.938629																								2018	1	1098.85	1182.11	1245.19
NIA_EDS19_1B	NIA_EDS19_1	2019-06-21 16:06:31	34.92	24.16	42.4439	-12.1551	37.5666	Mozambique	1421.99	2.65411	39.4741	0.420933	973.533	0.841734	38.9687	0.060486	1572.64	0.495648	40.0637	0.0977153	0.961512																								2018	1	1098.85	1182.11	1245.19
NIA_EDS19_1C	NIA_EDS19_1	2019-06-21 16:07:23	35.86	23.86	44.8775	-12.1551	37.5666	Mozambique	568.694	2.33128	19.0028	0.395718	120.233	0.518899	18.4974	0.035271	1384.64	2.17829	135.575	0.406219	0.866666																								2018	1	1098.85	1182.11	1245.19
NIA_EDS19_2A	NIA_EDS19_1	2019-06-21 16:14:10	42.8	24.81	64.2698	-12.1551	37.5665	Mozambique	1045.64	3.03039	43.6712	0.40537	597.178	1.21801	43.1658	0.044923	1513.14	1.12499	69.61	0.113834	0.93259																								2018	1	1098.85	1182.11	1245.19
NIA_EDS19_2B	NIA_EDS19_1	2019-06-21 16:14:51	39.4	24.2	54.1303	-12.1552	37.5665	Mozambique	1492.07	5.16793	83.0967	0.439796	1043.61	3.35556	82.5913	0.0793483	1495.39	1.75268	75.3198	0.113706	0.926664																								2018	1	1098.85	1182.11	1245.19
NIA_EDS19_2C	NIA_EDS19_1	2019-06-21 16:15:32	50.82	22.44	99.6213	-12.1552	37.5665	Mozambique	1711.38	4.02221	61.1236	0.427386	1262.92	2.20984	60.6182	0.0669384	1553.58	0.990915	47.4587	0.0823495	0.9542																								2018	1	1098.85	1182.11	1245.19
NIA_EDS19_2D	NIA_EDS19_1	2019-06-21 16:16:17	41.23	20.65	62.4566	-12.1552	37.5667	Mozambique	718.525	2.78224	26.5231	0.399875	270.064	0.969859	26.0177	0.0394275	1467.63	1.92123	89.9863	0.214279	0.912127																								2018	1	1098.85	1182.11	1245.19
NIA_EDS19_3A	NIA_EDS19_1	2019-06-21 16:19:18	35.79	20.68	46.5724	-12.1551	37.5667	Mozambique	826.801	2.53168	20.989	0.405611	378.34	0.719303	20.4836	0.045164	1542.64	1.06909	53.155	0.184164	0.94864																								2018	1	1098.85	1182.11	1245.19
NIA_EDS19_3B	NIA_EDS19_1	2019-06-21 16:20:01	34.94	21.16	44.1717	-12.1551	37.5667	Mozambique	646.775	2.19572	10.3983	0.396493	198.314	0.383343	9.89292	0.0360453	1549.3	1.09167	49.1886	0.281618	0.952485																								2018	1	1098.85	1182.11	1245.19
NIA_EDS19_cal2	NIA_EDS19_3	calibration						Mozambique	4849.17	15.4653	109.191	1.17533	4419.57	13.6604	109.024	0.798343	1583.36	1.78395	24.8587	0.286034	0.975925
NIA_EDS19_4A	NIA_EDS19_3	2019-06-23 14:43:36	37.03	21.46	49.3508	-11.7608	37.4689	Mozambique	859.299	3.2028	32.8826	0.392933	429.692	1.39784	32.7157	0.0159407	1357.93	1.61027	65.8013	0.0503801	0.929249	3.42028	2.01067	0.24737	64.4187	7.681	240	9.33	18.33	2.33		30.8756	18.5965	5.94315	26.0733	38.18	44.72	43.92	40.7458	0.44	0.66	0.396	0.515984	0.0126635	2018	1	948.292	925.332	984.66
NIA_EDS19_4B	NIA_EDS19_3	2019-06-23 14:44:16	37.73	21.13	51.4787	-11.7609	37.4689	Mozambique	790.216	3.19038	29.6261	0.384887	360.609	1.38541	29.4592	0.00789545	1347.1	1.88653	70.0393	0.0294965	0.924477	3.42028	2.01067	0.24737	64.4187	7.681	240	9.33	18.33	2.33		30.8756	18.5965	5.94315	26.0733	38.18	44.72	43.92	40.7458	0.44	0.66	0.396	0.515984	0.0126635	2018	1	948.292	925.332	984.66
NIA_EDS19_4C	NIA_EDS19_3	2019-06-23 14:44:58	39.82	22.14	56.8636	-11.7609	37.4689	Mozambique	2092.11	4.78053	77.7138	0.455105	1662.5	2.97557	77.5468	0.078113	1408.47	0.918918	41.8126	0.0661819	0.955434	3.42028	2.01067	0.24737	64.4187	7.681	240	9.33	18.33	2.33		30.8756	18.5965	5.94315	26.0733	38.18	44.72	43.92	40.7458	0.44	0.66	0.396	0.515984	0.0126635	2018	1	948.292	925.332	984.66
NIA_EDS19_5A	NIA_EDS19_3	2019-06-23 14:48:23	41.13	19.33	63.1609	-11.7607	37.4687	Mozambique	1527.97	3.56073	55.2727	0.430605	1098.37	1.75577	55.1058	0.0536131	1404.4	0.81834	44.8435	0.0685561	0.952226	3.42028	2.01067	0.24737	64.4187	7.681	240	9.33	18.33	2.33		30.8756	18.5965	5.94315	26.0733	38.18	44.72	43.92	40.7458	0.44	0.66	0.396	0.515984	0.0126635	2018	1	948.292	925.332	984.66
NIA_EDS19_5B	NIA_EDS19_3	2019-06-23 14:49:01	41.08	19.03	63.2285	-11.7608	37.4686	Mozambique	829.915	2.83749	31.2939	0.387108	400.308	1.03252	31.127	0.010116	1359.45	1.27817	67.2765	0.0343564	0.927852	3.42028	2.01067	0.24737	64.4187	7.681	240	9.33	18.33	2.33		30.8756	18.5965	5.94315	26.0733	38.18	44.72	43.92	40.7458	0.44	0.66	0.396	0.515984	0.0126635	2018	1	948.292	925.332	984.66
NIA_EDS19_5C	NIA_EDS19_3	2019-06-23 14:49:45	38.71	18.59	56.0234	-11.7608	37.4686	Mozambique	446.175	1.83406	0.906779	0.363164	16.5682	0.0290972	0.739857	-0.0138279	1411.62	0.903681	40.1189	-1.17823	0.957254	3.42028	2.01067	0.24737	64.4187	7.681	240	9.33	18.33	2.33		30.8756	18.5965	5.94315	26.0733	38.18	44.72	43.92	40.7458	0.44	0.66	0.396	0.515984	0.0126635	2018	1	948.292	925.332	984.66
NIA_EDS19_5D	NIA_EDS19_3	2019-06-23 14:50:55	39.5	19.84	57.551	-11.7605	37.4687	Mozambique	850.115	3.02946	29.1783	0.3863	420.508	1.22449	29.0114	0.00930816	1369.77	1.45395	60.1448	0.0303225	0.935461	3.42028	2.01067	0.24737	64.4187	7.681	240	9.33	18.33	2.33		30.8756	18.5965	5.94315	26.0733	38.18	44.72	43.92	40.7458	0.44	0.66	0.396	0.515984	0.0126635	2018	1	948.292	925.332	984.66
NIA_EDS19_6A	NIA_EDS19_3	2019-06-23 15:11:57	37.3	20.24	50.859	-11.7606	37.4682	Mozambique	764.908	2.65523	27.6989	0.383465	335.301	0.850266	27.532	0.00647356	1353.71	1.25132	70.7435	0.0261375	0.924119	3.42028	2.01067	0.24737	64.4187	7.681	240	9.33	18.33	2.33		30.8756	18.5965	5.94315	26.0733	38.18	44.72	43.92	40.7458	0.44	0.66	0.396	0.515984	0.0126635	2018	1	948.292	925.332	984.66
NIA_EDS19_6B	NIA_EDS19_3	2019-06-23 15:12:34	36.27	20.54	47.8993	-11.7605	37.4683	Mozambique	613.251	2.07962	10.406	0.376114	183.644	0.274654	10.2391	-0.000877876	1396.84	0.76151	49.5662	-0.00667777	0.94719	3.42028	2.01067	0.24737	64.4187	7.681	240	9.33	18.33	2.33		30.8756	18.5965	5.94315	26.0733	38.18	44.72	43.92	40.7458	0.44	0.66	0.396	0.515984	0.0126635	2018	1	948.292	925.332	984.66
NIA_EDS19_6C	NIA_EDS19_3	2019-06-23 15:13:26	35.41	19.88	46.0687	-11.7606	37.4682	Mozambique	619.472	2.39736	18.3912	0.375303	189.865	0.592395	18.2243	-0.00168872	1331.87	1.51477	81.3625	-0.0118468	0.912421	3.42028	2.01067	0.24737	64.4187	7.681	240	9.33	18.33	2.33		30.8756	18.5965	5.94315	26.0733	38.18	44.72	43.92	40.7458	0.44	0.66	0.396	0.515984	0.0126635	2018	1	948.292	925.332	984.66
NIA_EDS19_6D	NIA_EDS19_3	2019-06-23 15:14:12	34.78	20.42	44.1934	-11.7606	37.4682	Mozambique	694.482	2.54312	21.4593	0.380412	264.875	0.738157	21.2924	0.00341992	1354.68	1.37615	69.3072	0.0174921	0.925595	3.42028	2.01067	0.24737	64.4187	7.681	240	9.33	18.33	2.33		30.8756	18.5965	5.94315	26.0733	38.18	44.72	43.92	40.7458	0.44	0.66	0.396	0.515984	0.0126635	2018	1	948.292	925.332	984.66
NIA_EDS19_7A	NIA_EDS19_3	2019-06-23 15:18:18	40.87	23.49	59.0854	-11.7608	37.4683	Mozambique	1068.74	2.49052	23.4262	0.396827	639.133	0.685558	23.2593	0.019835	1428.21	0.558427	33.0792	0.0443265	0.964886	3.42028	2.01067	0.24737	64.4187	7.681	240	9.33	18.33	2.33		30.8756	18.5965	5.94315	26.0733	38.18	44.72	43.92	40.7458	0.44	0.66	0.396	0.515984	0.0126635	2018	1	948.292	925.332	984.66
NIA_EDS19_7B	NIA_EDS19_3	2019-06-23 15:18:59	36.03	21.17	46.8986	-11.7608	37.4684	Mozambique	554.595	1.87948	1.67331	0.365148	124.988	0.074518	1.50638	-0.0118441	1469.35	0.319329	11.2707	-0.139248	0.988091	3.42028	2.01067	0.24737	64.4187	7.681	240	9.33	18.33	2.33		30.8756	18.5965	5.94315	26.0733	38.18	44.72	43.92	40.7458	0.44	0.66	0.396	0.515984	0.0126635	2018	1	948.292	925.332	984.66
NIA_EDS19_7C	NIA_EDS19_3	2019-06-23 15:19:36	33.9	20.67	41.9532	-11.7607	37.4682	Mozambique	648.634	2.5471	17.3563	0.371615	219.027	0.742138	17.1894	-0.0053763	1353.97	1.67231	67.6283	-0.0332372	0.92723	3.42028	2.01067	0.24737	64.4187	7.681	240	9.33	18.33	2.33		30.8756	18.5965	5.94315	26.0733	38.18	44.72	43.92	40.7458	0.44	0.66	0.396	0.515984	0.0126635	2018	1	948.292	925.332	984.66
NIA_EDS19_7D	NIA_EDS19_3	2019-06-23 15:20:38	33.57	21.9	40.5493	-11.761	37.4682	Mozambique	617.318	2.19259	4.5953	0.366713	187.711	0.387628	4.42838	-0.0102786	1441.72	1.08525	21.6468	-0.0789506	0.976952	3.42028	2.01067	0.24737	64.4187	7.681	240	9.33	18.33	2.33		30.8756	18.5965	5.94315	26.0733	38.18	44.72	43.92	40.7458	0.44	0.66	0.396	0.515984	0.0126635	2018	1	948.292	925.332	984.66
NIA_EDS19_8A	NIA_EDS19_3	2019-06-23 15:24:29	36.32	23.12	46.4711	-11.7606	37.4683	Mozambique	1770.25	2.7736	44.9842	0.411538	1340.64	0.968635	44.8173	0.0345459	1434.9	0.377913	30.5291	0.0369775	0.967652	3.42028	2.01067	0.24737	64.4187	7.681	240	9.33	18.33	2.33		30.8756	18.5965	5.94315	26.0733	38.18	44.72	43.92	40.7458	0.44	0.66	0.396	0.515984	0.0126635	2018	1	948.292	925.332	984.66
NIA_EDS19_8C	NIA_EDS19_3	2019-06-23 15:25:44	42.67	22.92	65.4393	-11.7605	37.4685	Mozambique	724.279	2.38299	19.3417	0.376558	294.672	0.578026	19.1748	-0.00043402	1380.72	0.987266	57.1813	-0.00203379	0.938904	3.42028	2.01067	0.24737	64.4187	7.681	240	9.33	18.33	2.33		30.8756	18.5965	5.94315	26.0733	38.18	44.72	43.92	40.7458	0.44	0.66	0.396	0.515984	0.0126635	2018	1	948.292	925.332	984.66
NIA_EDS19_8D	NIA_EDS19_3	2019-06-23 15:26:27	40.72	21.8	59.9124	-11.7605	37.4685	Mozambique	1237.42	3.87323	62.9901	0.40481	807.816	2.06826	62.8232	0.0278185	1359.54	1.26884	67.2909	0.0468213	0.927842	3.42028	2.01067	0.24737	64.4187	7.681	240	9.33	18.33	2.33		30.8756	18.5965	5.94315	26.0733	38.18	44.72	43.92	40.7458	0.44	0.66	0.396	0.515984	0.0126635	2018	1	948.292	925.332	984.66
NIA_EDS19_9A	NIA_EDS19_3	2019-06-23 15:28:50	42.59	20.25	67.4234	-11.7606	37.4685	Mozambique	1567.07	5.4119	92.8639	0.434331	1137.46	3.60694	92.697	0.0573393	1351.05	1.56169	70.0742	0.068111	0.924646	3.42028	2.01067	0.24737	64.4187	7.681	240	9.33	18.33	2.33		30.8756	18.5965	5.94315	26.0733	38.18	44.72	43.92	40.7458	0.44	0.66	0.396	0.515984	0.0126635	2018	1	948.292	925.332	984.66
NIA_EDS19_9C	NIA_EDS19_3	2019-06-23 15:30:10	42.1	18.8	66.9089	-11.7606	37.4685	Mozambique	580.017	2.389	16.0485	0.374629	150.41	0.584038	15.8816	-0.00236248	1315.28	1.86168	88.3881	-0.0206605	0.904495	3.42028	2.01067	0.24737	64.4187	7.681	240	9.33	18.33	2.33		30.8756	18.5965	5.94315	26.0733	38.18	44.72	43.92	40.7458	0.44	0.66	0.396	0.515984	0.0126635	2018	1	948.292	925.332	984.66
NIA_EDS19_9D	NIA_EDS19_3	2019-06-23 15:31:00	38.88	17.88	57.0309	-11.7606	37.4685	Mozambique	535.407	2.57927	17.2048	0.370526	105.8	0.774309	17.0379	-0.00646532	1231.48	3.2853	126.216	-0.0752593	0.861298	3.42028	2.01067	0.24737	64.4187	7.681	240	9.33	18.33	2.33		30.8756	18.5965	5.94315	26.0733	38.18	44.72	43.92	40.7458	0.44	0.66	0.396	0.515984	0.0126635	2018	1	948.292	925.332	984.66
NIA_EDS19_cal3	NIA_EDS19_4	calibration						Mozambique	4787.46	15.1893	106.739	1.15331	4348.38	13.3806	106.456	0.779687	1583.77	1.77648	24.6769	0.283997	0.976103
NIA_EDS19_10A	NIA_EDS19_4	2019-06-24 12:02:04	38.56	44.81	37.6744	-12.1411	37.5019	Mozambique	1233.22	3.69651	56.2933	0.412353	794.139	1.8878	56.0102	0.038728	1440.65	1.24835	64.6673	0.0702612	0.934117	3.45551	0.377609	0	89.4049	4.27493	120	4	5.33	2.67		9.58904	1.14943		10.3351	42.68	44.1725	43.92	42.827	0.41	0.7175	0.396	0.440293	0.0102807	2017	2	1088.42	1182.11	1245.19
NIA_EDS19_10B	NIA_EDS19_4	2019-06-24 12:02:41	36.05	47.13	31.4886	-12.1411	37.5018	Mozambique	1238.34	3.52945	56.7488	0.405189	799.252	1.72074	56.4657	0.0315643	1441.81	1.13151	64.8283	0.0569441	0.934014	3.45551	0.377609	0	89.4049	4.27493	120	4	5.33	2.67		9.58904	1.14943		10.3351	42.68	44.1725	43.92	42.827	0.41	0.7175	0.396	0.440293	0.0102807	2017	2	1088.42	1182.11	1245.19
NIA_EDS19_10C	NIA_EDS19_4	2019-06-24 12:03:20	34.52	41.36	32.0989	-12.1411	37.5018	Mozambique	733.757	2.70114	21.229	0.375329	294.672	0.892429	20.9459	0.00170403	1435.97	1.58526	64.9625	0.00830449	0.933635	3.45551	0.377609	0	89.4049	4.27493	120	4	5.33	2.67		9.58904	1.14943		10.3351	42.68	44.1725	43.92	42.827	0.41	0.7175	0.396	0.440293	0.0102807	2017	2	1088.42	1182.11	1245.19
NIA_EDS19_10D	NIA_EDS19_4	2019-06-24 12:04:07	37.15	39.27	38.4099	-12.141	37.5017	Mozambique	542.753	2.07287	9.71912	0.366726	103.669	0.26415	9.43603	-0.00689909	1410.09	1.3097	81.6857	-0.093847	0.916573	3.45551	0.377609	0	89.4049	4.27493	120	4	5.33	2.67		9.58904	1.14943		10.3351	42.68	44.1725	43.92	42.827	0.41	0.7175	0.396	0.440293	0.0102807	2017	2	1088.42	1182.11	1245.19
NIA_EDS19_11A	NIA_EDS19_4	2019-06-24 12:06:46	37.44	32.32	43.4856	-12.1412	37.5021	Mozambique	622.084	2.10131	9.27185	0.372795	183	0.29259	8.98877	-0.000830249	1477.76	0.861261	46.1968	-0.00670491	0.953181	3.45551	0.377609	0	89.4049	4.27493	120	4	5.33	2.67		9.58904	1.14943		10.3351	42.68	44.1725	43.92	42.827	0.41	0.7175	0.396	0.440293	0.0102807	2017	2	1088.42	1182.11	1245.19
NIA_EDS19_11B	NIA_EDS19_4	2019-06-24 12:07:44	36.22	30.77	41.6184	-12.1412	37.5018	Mozambique	848.407	3.16248	28.5493	0.383706	409.323	1.35377	28.2662	0.0100811	1437.29	1.73278	63.1689	0.0354012	0.935405	3.45551	0.377609	0	89.4049	4.27493	120	4	5.33	2.67		9.58904	1.14943		10.3351	42.68	44.1725	43.92	42.827	0.41	0.7175	0.396	0.440293	0.0102807	2017	2	1088.42	1182.11	1245.19
NIA_EDS19_11C	NIA_EDS19_4	2019-06-24 12:08:22	46.63	31.84	70.972	-12.1411	37.5018	Mozambique	871.738	2.83352	36.1974	0.388191	432.654	1.02481	35.9143	0.0145655	1422.53	1.22824	75.1531	0.0478937	0.923353	3.45551	0.377609	0	89.4049	4.27493	120	4	5.33	2.67		9.58904	1.14943		10.3351	42.68	44.1725	43.92	42.827	0.41	0.7175	0.396	0.440293	0.0102807	2017	2	1088.42	1182.11	1245.19
NIA_EDS19_11D	NIA_EDS19_4	2019-06-24 12:09:21	37.68	28.92	46.2686	-12.141	37.5018	Mozambique	464.422	1.89835	3.23565	0.364262	25.3377	0.0896386	2.95256	-0.0093627	1369.63	1.76625	101.576	-0.506136	0.895633	3.45551	0.377609	0	89.4049	4.27493	120	4	5.33	2.67		9.58904	1.14943		10.3351	42.68	44.1725	43.92	42.827	0.41	0.7175	0.396	0.440293	0.0102807	2017	2	1088.42	1182.11	1245.19
NIA_EDS19_12A	NIA_EDS19_4	2019-06-24 12:13:33	34.36	28.87	38.5916	-12.1397	37.5023	Mozambique	782.562	3.12617	34.1812	0.382368	343.477	1.31745	33.8981	0.00874263	1392.15	1.94646	87.4423	0.0354373	0.910174	3.45551	0.377609	0	89.4049	4.27493	120	4	5.33	2.67		9.58904	1.14943		10.3351	42.68	44.1725	43.92	42.827	0.41	0.7175	0.396	0.440293	0.0102807	2017	2	1088.42	1182.11	1245.19
NIA_EDS19_12B	NIA_EDS19_4	2019-06-24 12:14:17	35.44	29.5	40.6043	-12.1393	37.5024	Mozambique	630.727	2.85652	23.5728	0.37746	191.642	1.0478	23.2897	0.00383537	1352.8	2.69614	104.632	0.0270757	0.891641	3.45551	0.377609	0	89.4049	4.27493	120	4	5.33	2.67		9.58904	1.14943		10.3351	42.68	44.1725	43.92	42.827	0.41	0.7175	0.396	0.440293	0.0102807	2017	2	1088.42	1182.11	1245.19
NIA_EDS19_12C	NIA_EDS19_4	2019-06-24 12:14:55	32.4	27.83	35.0902	-12.1393	37.5024	Mozambique	437.478	1.84109	1.24068	0.36331	-1.60666	0.032376	0.957589	-0.0103146	6400.96	-47.0182	-2428.05	41.0964	2.47532	3.45551	0.377609	0	89.4049	4.27493	120	4	5.33	2.67		9.58904	1.14943		10.3351	42.68	44.1725	43.92	42.827	0.41	0.7175	0.396	0.440293	0.0102807	2017	2	1088.42	1182.11	1245.19
NIA_EDS19_12D	NIA_EDS19_4	2019-06-24 12:15:43	34.17	28.37	38.4547	-12.1394	37.5022	Mozambique	690.514	2.10214	11.8862	0.371549	251.43	0.293428	11.6031	-0.00207628	1485.11	0.631778	43.6188	-0.0122647	0.955887	3.45551	0.377609	0	89.4049	4.27493	120	4	5.33	2.67		9.58904	1.14943		10.3351	42.68	44.1725	43.92	42.827	0.41	0.7175	0.396	0.440293	0.0102807	2017	2	1088.42	1182.11	1245.19
NIA_EDS19_13A	NIA_EDS19_4	2019-06-24 12:23:19	33.52	26.63	37.9873	-12.1392	37.5023	Mozambique	486.24	1.91549	3.10916	0.362981	47.1556	0.10677	2.82607	-0.0106437	1457.12	1.20264	55.5781	-0.328915	0.943458	3.45551	0.377609	0	89.4049	4.27493	120	4	5.33	2.67		9.58904	1.14943		10.3351	42.68	44.1725	43.92	42.827	0.41	0.7175	0.396	0.440293	0.0102807	2017	2	1088.42	1182.11	1245.19
NIA_EDS19_13B	NIA_EDS19_4	2019-06-24 12:24:12	38.29	27.1	49.0448	-12.1392	37.5023	Mozambique	1608.13	4.11311	56.1646	0.419708	1169.05	2.3044	55.8815	0.0460829	1477.48	1.06161	44.9484	0.0582449	0.95438	3.45551	0.377609	0	89.4049	4.27493	120	4	5.33	2.67		9.58904	1.14943		10.3351	42.68	44.1725	43.92	42.827	0.41	0.7175	0.396	0.440293	0.0102807	2017	2	1088.42	1182.11	1245.19
NIA_EDS19_13C	NIA_EDS19_4	2019-06-24 12:24:50	39.42	27.68	51.7005	-12.1392	37.5022	Mozambique	719.226	2.19513	13.6115	0.406167	280.141	0.386413	13.3284	0.032542	1481.54	0.744919	44.8613	0.172111	0.954583	3.45551	0.377609	0	89.4049	4.27493	120	4	5.33	2.67		9.58904	1.14943		10.3351	42.68	44.1725	43.92	42.827	0.41	0.7175	0.396	0.440293	0.0102807	2017	2	1088.42	1182.11	1245.19
NIA_EDS19_13D	NIA_EDS19_4	2019-06-24 12:25:36	36.94	25.68	46.4708	-12.1392	37.5023	Mozambique	1146.82	3.0804	1.84555	0.361954	707.738	1.27168	1.56246	-0.0116706	1552.91	1.01712	2.18192	-0.0256091	0.997797	3.45551	0.377609	0	89.4049	4.27493	120	4	5.33	2.67		9.58904	1.14943		10.3351	42.68	44.1725	43.92	42.827	0.41	0.7175	0.396	0.440293	0.0102807	2017	2	1088.42	1182.11	1245.19
NIA_EDS19_14A	NIA_EDS19_4	2019-06-24 12:27:30	36.22	24.71	45.2614	-12.1391	37.5023	Mozambique	2400.13	6.39489	91.1481	0.448258	1961.04	4.58618	90.865	0.0746333	1477.45	1.2595	43.5691	0.0562325	0.955717	3.45551	0.377609	0	89.4049	4.27493	120	4	5.33	2.67		9.58904	1.14943		10.3351	42.68	44.1725	43.92	42.827	0.41	0.7175	0.396	0.440293	0.0102807	2017	2	1088.42	1182.11	1245.19
NIA_EDS19_14C	NIA_EDS19_4	2019-06-24 12:29:06	63.45	25.28	174.405	-12.1389	37.5022	Mozambique	1711.26	6.07338	87.1546	0.515593	1272.18	4.26466	86.8715	0.141968	1438.15	1.75737	62.5018	0.160501	0.936079	3.45551	0.377609	0	89.4049	4.27493	120	4	5.33	2.67		9.58904	1.14943		10.3351	42.68	44.1725	43.92	42.827	0.41	0.7175	0.396	0.440293	0.0102807	2017	2	1088.42	1182.11	1245.19
NIA_EDS19_14D	NIA_EDS19_4	2019-06-24 12:29:44	63.21	22.68	178.52	-12.1388	37.5022	Mozambique	1699.8	6.71062	110.633	0.431635	1260.71	4.9019	110.35	0.0580095	1407.38	1.99472	78.4016	0.0647627	0.919515	3.45551	0.377609	0	89.4049	4.27493	120	4	5.33	2.67		9.58904	1.14943		10.3351	42.68	44.1725	43.92	42.827	0.41	0.7175	0.396	0.440293	0.0102807	2017	2	1088.42	1182.11	1245.19
NIA_EDS19_15A	NIA_EDS19_4	2019-06-24 12:32:07	47.59	16.4	91.3874	-12.1389	37.5024	Mozambique	841.49	3.14305	33.612	0.38265	402.405	1.33433	33.3289	0.00902497	1417.32	1.71313	74.7108	0.0317893	0.923511	3.45551	0.377609	0	89.4049	4.27493	120	4	5.33	2.67		9.58904	1.14943		10.3351	42.68	44.1725	43.92	42.827	0.41	0.7175	0.396	0.440293	0.0102807	2017	2	1088.42	1182.11	1245.19
NIA_EDS19_15B	NIA_EDS19_4	2019-06-24 12:32:44	47.36	17.22	89.4453	-12.1388	37.5025	Mozambique	685.315	2.59452	21.3329	0.379523	246.23	0.785807	21.0498	0.00589801	1414.25	1.64521	76.9467	0.0338781	0.921244	3.45551	0.377609	0	89.4049	4.27493	120	4	5.33	2.67		9.58904	1.14943		10.3351	42.68	44.1725	43.92	42.827	0.41	0.7175	0.396	0.440293	0.0102807	2017	2	1088.42	1182.11	1245.19
NIA_EDS19_15C	NIA_EDS19_4	2019-06-24 12:33:22	44.04	16.55	76.0814	-12.1389	37.5024	Mozambique	816.66	3.43517	41.346	0.393105	377.575	1.62646	41.0629	0.0194802	1375.87	2.16042	95.2315	0.07099	0.901913	3.45551	0.377609	0	89.4049	4.27493	120	4	5.33	2.67		9.58904	1.14943		10.3351	42.68	44.1725	43.92	42.827	0.41	0.7175	0.396	0.440293	0.0102807	2017	2	1088.42	1182.11	1245.19
NIA_EDS19_15D	NIA_EDS19_4	2019-06-24 12:34:01	42	17.05	67.9929	-12.1388	37.5023	Mozambique	544.973	2.25811	11.6784	0.369509	105.888	0.449392	11.3953	-0.00411593	1377.75	2.13142	94.364	-0.0535576	0.902839	3.45551	0.377609	0	89.4049	4.27493	120	4	5.33	2.67		9.58904	1.14943		10.3351	42.68	44.1725	43.92	42.827	0.41	0.7175	0.396	0.440293	0.0102807	2017	2	1088.42	1182.11	1245.19
NIA_EDS19_16A	NIA_EDS19_4	2019-06-24 12:36:27	53.16	20.95	113.862	-12.1386	37.5021	Mozambique	828.894	2.75905	30.3764	0.37963	389.81	0.950334	30.0933	0.00600526	1430.52	1.27128	70.2862	0.0220396	0.928333	3.45551	0.377609	0	89.4049	4.27493	120	4	5.33	2.67		9.58904	1.14943		10.3351	42.68	44.1725	43.92	42.827	0.41	0.7175	0.396	0.440293	0.0102807	2017	2	1088.42	1182.11	1245.19
NIA_EDS19_16B	NIA_EDS19_4	2019-06-24 12:37:12	46.16	18.89	82.4591	-12.1385	37.5024	Mozambique	2317.47	6.46381	91.7893	0.478538	1878.39	4.65509	91.5063	0.104913	1472.9	1.33057	45.6662	0.0822709	0.953548	3.45551	0.377609	0	89.4049	4.27493	120	4	5.33	2.67		9.58904	1.14943		10.3351	42.68	44.1725	43.92	42.827	0.41	0.7175	0.396	0.440293	0.0102807	2017	2	1088.42	1182.11	1245.19
NIA_EDS19_16C	NIA_EDS19_4	2019-06-24 12:38:02	58.25	19.45	147.935	-12.1384	37.5024	Mozambique	2173.72	8.27038	128.907	0.475278	1734.64	6.46167	128.624	0.101653	1284.1	1.74364	60.5995	0.0752562	0.930968	3.82325	0.2352	0	95.2256	10.4447	200	4.8	9.8	3		61.5599	6.66667		61.1433	38.18	44.1725	43.92	38.5273	0.44	0.7175	0.396	0.456082	0.0118379	2017	2	1088.42	1182.11	1245.19
NIA_EDS19_16D	NIA_EDS19_4	2019-06-24 12:39:04	48.28	16.53	94.4723	-12.1382	37.5025	Mozambique	667.443	3.46793	34.3995	0.384191	228.358	1.65921	34.1164	0.0105657	1177.25	3.11799	111.937	0.0544728	0.87002	3.82325	0.2352	0	95.2256	10.4447	200	4.8	9.8	3		61.5599	6.66667		61.1433	38.18	44.1725	43.92	38.5273	0.44	0.7175	0.396	0.456082	0.0118379	2017	2	1088.42	1182.11	1245.19
NIA_EDS19_17A	NIA_EDS19_4	2019-06-24 12:41:15	42.44	16.02	70.4443	-12.138	37.5023	Mozambique	985.76	6.39922	69.547	0.41324	546.675	4.5905	69.2639	0.0396146	1197.42	3.66521	96.5566	0.0867766	0.887547	3.82325	0.2352	0	95.2256	10.4447	200	4.8	9.8	3		61.5599	6.66667		61.1433	38.18	44.1725	43.92	38.5273	0.44	0.7175	0.396	0.456082	0.0118379	2017	2	1088.42	1182.11	1245.19
NIA_EDS19_17B	NIA_EDS19_4	2019-06-24 12:42:06	41.43	17.42	65.6888	-12.1379	37.5024	Mozambique	1235.7	6.81582	80.2634	0.421168	796.611	5.00711	79.9803	0.0475431	1238.18	2.83691	79.1184	0.0739017	0.90876	3.82325	0.2352	0	95.2256	10.4447	200	4.8	9.8	3		61.5599	6.66667		61.1433	38.18	44.1725	43.92	38.5273	0.44	0.7175	0.396	0.456082	0.0118379	2017	2	1088.42	1182.11	1245.19
NIA_EDS19_17C	NIA_EDS19_4	2019-06-24 12:42:53	48.89	20.37	92.9253	-12.1378	37.5024	Mozambique	1171.2	5.4177	62.5088	0.411661	732.12	3.60898	62.2257	0.038036	1263.98	2.27124	68.3729	0.0656723	0.921664	3.82325	0.2352	0	95.2256	10.4447	200	4.8	9.8	3		61.5599	6.66667		61.1433	38.18	44.1725	43.92	38.5273	0.44	0.7175	0.396	0.456082	0.0118379	2017	2	1088.42	1182.11	1245.19
NIA_EDS19_17D	NIA_EDS19_4	2019-06-24 12:43:41	44.47	18.92	75.5823	-12.1377	37.5024	Mozambique	767.287	2.97234	20.293	0.38047	328.203	1.16362	20.0099	0.00684499	1302.46	1.68328	50.5388	0.027166	0.942535	3.82325	0.2352	0	95.2256	10.4447	200	4.8	9.8	3		61.5599	6.66667		61.1433	38.18	44.1725	43.92	38.5273	0.44	0.7175	0.396	0.456082	0.0118379	2017	2	1088.42	1182.11	1245.19
NIA_EDS19_18A	NIA_EDS19_4	2019-06-24 12:46:00	39.13	17.66	57.9562	-12.1377	37.502	Mozambique	1056.22	5.58547	63.6146	0.420049	617.131	3.77676	63.3316	0.0464237	1236.3	2.75796	80.7468	0.0930073	0.906929	3.82325	0.2352	0	95.2256	10.4447	200	4.8	9.8	3		61.5599	6.66667		61.1433	38.18	44.1725	43.92	38.5273	0.44	0.7175	0.396	0.456082	0.0118379	2017	2	1088.42	1182.11	1245.19
NIA_EDS19_18B	NIA_EDS19_4	2019-06-24 12:46:37	39.89	19.48	59.0263	-12.1376	37.5019	Mozambique	758.933	2.07597	95.4444	0.429895	319.848	0.267255	95.1613	0.0562696	1057.24	0.322015	200.192	0.186008	0.770701	3.82325	0.2352	0	95.2256	10.4447	200	4.8	9.8	3		61.5599	6.66667		61.1433	38.18	44.1725	43.92	38.5273	0.44	0.7175	0.396	0.456082	0.0118379	2017	2	1088.42	1182.11	1245.19
NIA_EDS19_18C	NIA_EDS19_4	2019-06-24 12:47:14	39.72	20.39	57.8321	-12.1376	37.5019	Mozambique	1038.34	7.38552	83.897	0.422883	599.256	5.57681	83.6139	0.0492578	1179.03	3.99964	104.701	0.0969212	0.877555	3.82325	0.2352	0	95.2256	10.4447	200	4.8	9.8	3		61.5599	6.66667		61.1433	38.18	44.1725	43.92	38.5273	0.44	0.7175	0.396	0.456082	0.0118379	2017	2	1088.42	1182.11	1245.19
NIA_EDS19_19A	NIA_EDS19_4	2019-06-24 12:50:37	37.76	19.84	52.4058	-12.1374	37.5021	Mozambique	1255.5	12.6053	150.4	0.437754	816.42	10.7966	150.116	0.0641293	1116.52	5.38218	130.659	0.0877078	0.844686	3.82325	0.2352	0	95.2256	10.4447	200	4.8	9.8	3		61.5599	6.66667		61.1433	38.18	44.1725	43.92	38.5273	0.44	0.7175	0.396	0.456082	0.0118379	2017	2	1088.42	1182.11	1245.19
NIA_EDS19_19B	NIA_EDS19_4	2019-06-24 12:51:18	38.66	23.39	52.5786	-12.1372	37.5019	Mozambique	1988.96	10.9044	145.789	0.487026	1549.88	9.09568	145.506	0.113401	1248.19	2.67017	74.5795	0.0913332	0.914175	3.82325	0.2352	0	95.2256	10.4447	200	4.8	9.8	3		61.5599	6.66667		61.1433	38.18	44.1725	43.92	38.5273	0.44	0.7175	0.396	0.456082	0.0118379	2017	2	1088.42	1182.11	1245.19
NIA_EDS19_19C	NIA_EDS19_4	2019-06-24 12:51:57	47.99	23.23	85.6309	-12.1371	37.5018	Mozambique	943.183	4.01736	41.2083	0.405321	504.098	2.20864	40.9252	0.0316963	1271.62	2.0309	65.7036	0.0799611	0.924911	3.82325	0.2352	0	95.2256	10.4447	200	4.8	9.8	3		61.5599	6.66667		61.1433	38.18	44.1725	43.92	38.5273	0.44	0.7175	0.396	0.456082	0.0118379	2017	2	1088.42	1182.11	1245.19
NIA_EDS19_20C	NIA_EDS19_4	2019-06-24 12:56:42	37.78	19.55	52.6524	-12.1371	37.5018	Mozambique	943.964	5.80945	63.7065	0.41284	504.88	4.00073	63.4234	0.0392151	1200.82	3.46856	96.0053	0.0932764	0.888399	3.82325	0.2352	0	95.2256	10.4447	200	4.8	9.8	3		61.5599	6.66667		61.1433	38.18	44.1725	43.92	38.5273	0.44	0.7175	0.396	0.456082	0.0118379	2017	2	1088.42	1182.11	1245.19
NIA_EDS19_20D	NIA_EDS19_4	2019-06-24 12:57:20	39.62	22.19	56.2234	-12.1371	37.5019	Mozambique	974.326	7.40639	79.1945	0.420969	535.241	5.59767	78.9114	0.047344	1165.42	4.44284	109.353	0.103093	0.871512	3.82325	0.2352	0	95.2256	10.4447	200	4.8	9.8	3		61.5599	6.66667		61.1433	38.18	44.1725	43.92	38.5273	0.44	0.7175	0.396	0.456082	0.0118379	2017	2	1088.42	1182.11	1245.19
NIA_EDS19_21A	NIA_EDS19_4	2019-06-24 12:59:58	35.39	20.13	45.8743	-12.1367	37.502	Mozambique	740.024	5.48518	54.5883	0.395685	300.94	3.67647	54.3052	0.0220598	1123.94	5.0051	129.08	0.0823934	0.847133	3.82325	0.2352	0	95.2256	10.4447	200	4.8	9.8	3		61.5599	6.66667		61.1433	38.18	44.1725	43.92	38.5273	0.44	0.7175	0.396	0.456082	0.0118379	2017	2	1088.42	1182.11	1245.19
NIA_EDS19_21B	NIA_EDS19_4	2019-06-24 13:00:38	34.22	20.6	42.7447	-12.1366	37.502	Mozambique	516.83	2.01039	3.30349	0.349967	77.7454	0.201675	3.0204	-0.0236577	1338.18	1.26535	33.0873	-0.407232	0.962603	3.82325	0.2352	0	95.2256	10.4447	200	4.8	9.8	3		61.5599	6.66667		61.1433	38.18	44.1725	43.92	38.5273	0.44	0.7175	0.396	0.456082	0.0118379	2017	2	1088.42	1182.11	1245.19
NIA_EDS19_21C	NIA_EDS19_4	2019-06-24 13:01:22	32.53	21.59	38.4043	-12.1365	37.5021	Mozambique	806.999	5.40575	57.8481	0.402652	367.915	3.59703	57.565	0.029027	1158.72	4.12951	115.385	0.0914251	0.864706	3.82325	0.2352	0	95.2256	10.4447	200	4.8	9.8	3		61.5599	6.66667		61.1433	38.18	44.1725	43.92	38.5273	0.44	0.7175	0.396	0.456082	0.0118379	2017	2	1088.42	1182.11	1245.19
NIA_EDS19_21D	NIA_EDS19_4	2019-06-24 13:02:00	33.29	22.96	39.3777	-12.1365	37.5021	Mozambique	1031.03	8.05358	90.4175	0.421771	591.945	6.24486	90.1344	0.0481457	1159.86	4.46035	112.402	0.0943436	0.867854	3.82325	0.2352	0	95.2256	10.4447	200	4.8	9.8	3		61.5599	6.66667		61.1433	38.18	44.1725	43.92	38.5273	0.44	0.7175	0.396	0.456082	0.0118379	2017	2	1088.42	1182.11	1245.19
NIA_EDS19_22A	NIA_EDS19_4	2019-06-24 13:04:26	34.36	23.19	41.6733	-12.1368	37.502	Mozambique	973.322	6.44148	74.5199	0.406706	534.237	4.63276	74.2368	0.0330806	1182.48	3.73785	104.577	0.0732258	0.877995	3.82325	0.2352	0	95.2256	10.4447	200	4.8	9.8	3		61.5599	6.66667		61.1433	38.18	44.1725	43.92	38.5273	0.44	0.7175	0.396	0.456082	0.0118379	2017	2	1088.42	1182.11	1245.19
NIA_EDS19_22B	NIA_EDS19_4	2019-06-24 13:05:09	33.66	23.24	40.0544	-12.1365	37.502	Mozambique	1449.33	6.57127	83.9707	0.433435	1010.25	4.76256	83.6876	0.0598103	1267.8	2.17863	66.8408	0.0750635	0.923499	3.82325	0.2352	0	95.2256	10.4447	200	4.8	9.8	3		61.5599	6.66667		61.1433	38.18	44.1725	43.92	38.5273	0.44	0.7175	0.396	0.456082	0.0118379	2017	2	1088.42	1182.11	1245.19
NIA_EDS19_22C	NIA_EDS19_4	2019-06-24 13:05:47	39.08	26.74	51.427	-12.1363	37.5021	Mozambique	2005.6	6.34781	91.712	0.460437	1566.51	4.5391	91.4289	0.086812	1309.49	1.38311	48.6417	0.0725733	0.944854	3.82325	0.2352	0	95.2256	10.4447	200	4.8	9.8	3		61.5599	6.66667		61.1433	38.18	44.1725	43.92	38.5273	0.44	0.7175	0.396	0.456082	0.0118379	2017	2	1088.42	1182.11	1245.19
NIA_EDS19_22D	NIA_EDS19_4	2019-06-24 13:06:29	42.62	24.03	64.3285	-12.1363	37.5021	Mozambique	786.853	3.55766	32.9692	0.382982	347.768	1.74894	32.6861	0.00935665	1252.24	2.29559	74.9061	0.0336936	0.914087	3.82325	0.2352	0	95.2256	10.4447	200	4.8	9.8	3		61.5599	6.66667		61.1433	38.18	44.1725	43.92	38.5273	0.44	0.7175	0.396	0.456082	0.0118379	2017	2	1088.42	1182.11	1245.19
NIA_EDS19_23A	NIA_EDS19_4	2019-06-24 13:08:43	36.39	21.32	47.7416	-12.1366	37.502	Mozambique	760.524	3.84492	37.6506	0.390301	321.439	2.0362	37.3675	0.0166764	1219.06	2.81493	90.1938	0.0632498	0.895856	3.82325	0.2352	0	95.2256	10.4447	200	4.8	9.8	3		61.5599	6.66667		61.1433	38.18	44.1725	43.92	38.5273	0.44	0.7175	0.396	0.456082	0.0118379	2017	2	1088.42	1182.11	1245.19
NIA_EDS19_23B	NIA_EDS19_4	2019-06-24 13:09:23	36.48	22.85	47.0442	-12.1363	37.5019	Mozambique	843.783	6.4999	59.2702	0.397926	404.699	4.69119	58.9871	0.024301	1162.32	4.91129	107.822	0.0697984	0.872786	3.82325	0.2352	0	95.2256	10.4447	200	4.8	9.8	3		61.5599	6.66667		61.1433	38.18	44.1725	43.92	38.5273	0.44	0.7175	0.396	0.456082	0.0118379	2017	2	1088.42	1182.11	1245.19
NIA_EDS19_23C	NIA_EDS19_4	2019-06-24 13:10:04	35.41	23.37	44.0619	-12.1362	37.5018	Mozambique	827.753	5.81666	64.7652	0.395729	388.668	4.00794	64.4821	0.0221035	1146.56	4.30982	121.063	0.065209	0.857703	3.82325	0.2352	0	95.2256	10.4447	200	4.8	9.8	3		61.5599	6.66667		61.1433	38.18	44.1725	43.92	38.5273	0.44	0.7175	0.396	0.456082	0.0118379	2017	2	1088.42	1182.11	1245.19
NIA_EDS19_23D	NIA_EDS19_4	2019-06-24 13:10:42	36.53	24.47	46.1824	-12.1362	37.5018	Mozambique	921.59	7.77112	84.8176	0.402339	482.505	5.9624	84.5345	0.0287142	1128.63	5.08382	125.846	0.06717	0.85092	3.82325	0.2352	0	95.2256	10.4447	200	4.8	9.8	3		61.5599	6.66667		61.1433	38.18	44.1725	43.92	38.5273	0.44	0.7175	0.396	0.456082	0.0118379	2017	2	1088.42	1182.11	1245.19
NIA_EDS19_24B	NIA_EDS19_4	2019-06-24 13:14:14	32.08	23.21	36.6686	-12.1358	37.5017	Mozambique	556.496	2.95386	22.6844	0.371384	117.411	1.14514	22.4013	-0.00224132	1123.54	3.99448	136.43	-0.0214493	0.839776	3.82325	0.2352	0	95.2256	10.4447	200	4.8	9.8	3		61.5599	6.66667		61.1433	38.18	44.1725	43.92	38.5273	0.44	0.7175	0.396	0.456082	0.0118379	2017	2	1088.42	1182.11	1245.19
NIA_EDS19_24C	NIA_EDS19_4	2019-06-24 13:15:07	32.35	25.36	36.189	-12.1359	37.5019	Mozambique	625.104	4.60208	40.3702	0.379712	186.019	2.79337	40.0871	0.00608717	1079.54	5.90921	148.062	0.0353285	0.822707	3.82325	0.2352	0	95.2256	10.4447	200	4.8	9.8	3		61.5599	6.66667		61.1433	38.18	44.1725	43.92	38.5273	0.44	0.7175	0.396	0.456082	0.0118379	2017	2	1088.42	1182.11	1245.19
NIA_EDS19_24D	NIA_EDS19_4	2019-06-24 13:15:57	31.64	24.67	35.0872	-12.1358	37.5021	Mozambique	808.723	5.68823	57.6983	0.393226	369.638	3.87951	57.4153	0.0196006	1156.85	4.42588	114.363	0.0613481	0.865555	3.82325	0.2352	0	95.2256	10.4447	200	4.8	9.8	3		61.5599	6.66667		61.1433	38.18	44.1725	43.92	38.5273	0.44	0.7175	0.396	0.456082	0.0118379	2017	2	1088.42	1182.11	1245.19
NIA_EDS19_25B	NIA_EDS19_4	2019-06-24 13:20:03	31.64	27.19	33.9134	-12.1358	37.5023	Mozambique	746.344	5.39769	57.149	0.405649	307.259	3.58897	56.8659	0.032024	1121.49	4.77509	132.099	0.116895	0.843829	3.82325	0.2352	0	95.2256	10.4447	200	4.8	9.8	3		61.5599	6.66667		61.1433	38.18	44.1725	43.92	38.5273	0.44	0.7175	0.396	0.456082	0.0118379	2017	2	1088.42	1182.11	1245.19
NIA_EDS19_25C	NIA_EDS19_4	2019-06-24 13:20:44	31.67	26.86	34.1251	-12.1357	37.5024	Mozambique	591.825	3.71934	31.5538	0.378731	152.74	1.91063	31.2707	0.00510575	1099.11	5.01169	143.213	0.0367432	0.830061	3.82325	0.2352	0	95.2256	10.4447	200	4.8	9.8	3		61.5599	6.66667		61.1433	38.18	44.1725	43.92	38.5273	0.44	0.7175	0.396	0.456082	0.0118379	2017	2	1088.42	1182.11	1245.19
NIA_EDS19_25D	NIA_EDS19_4	2019-06-24 13:21:28	31.26	26.24	33.6231	-12.1356	37.5024	Mozambique	550.653	4.15008	33.5403	0.374082	111.568	2.34136	33.2572	0.000457437	989.571	7.57001	187.737	0.00405759	0.770363	3.82325	0.2352	0	95.2256	10.4447	200	4.8	9.8	3		61.5599	6.66667		61.1433	38.18	44.1725	43.92	38.5273	0.44	0.7175	0.396	0.456082	0.0118379	2017	2	1088.42	1182.11	1245.19
NIA_EDS19_26A	NIA_EDS19_4	2019-06-24 13:24:41	31.23	28.07	32.7331	-12.1356	37.5021	Mozambique	590.665	3.46745	29.659	0.374783	151.58	1.65873	29.3759	0.00115774	1115.82	4.4509	137.625	0.00852295	0.837663	3.82325	0.2352	0	95.2256	10.4447	200	4.8	9.8	3		61.5599	6.66667		61.1433	38.18	44.1725	43.92	38.5273	0.44	0.7175	0.396	0.456082	0.0118379	2017	2	1088.42	1182.11	1245.19
NIA_EDS19_26B	NIA_EDS19_4	2019-06-24 13:25:28	30.33	27.37	31.3982	-12.1356	37.5021	Mozambique	503.755	2.60573	15.294	0.367871	64.6699	0.797012	15.0109	-0.0057542	1074.28	4.82616	158.701	-0.0955941	0.811612	3.82325	0.2352	0	95.2256	10.4447	200	4.8	9.8	3		61.5599	6.66667		61.1433	38.18	44.1725	43.92	38.5273	0.44	0.7175	0.396	0.456082	0.0118379	2017	2	1088.42	1182.11	1245.19
NIA_EDS19_26C	NIA_EDS19_4	2019-06-24 13:26:09	30.28	27.91	31.0757	-12.1355	37.5021	Mozambique	452.567	1.98435	4.13466	0.364068	13.4827	0.175638	3.85157	-0.0095568	1025.26	4.86852	186.403	-0.726773	0.777806	3.82325	0.2352	0	95.2256	10.4447	200	4.8	9.8	3		61.5599	6.66667		61.1433	38.18	44.1725	43.92	38.5273	0.44	0.7175	0.396	0.456082	0.0118379	2017	2	1088.42	1182.11	1245.19
NIA_EDS19_26D	NIA_EDS19_4	2019-06-24 13:26:52	30.08	27.71	30.807	-12.1355	37.5021	Mozambique	423.567	1.85601	1.55036	0.362798	-15.5178	0.0472898	1.26728	-0.0108273	1576.85	-1.75166	-81.9576	1.1003	1.08893	3.82325	0.2352	0	95.2256	10.4447	200	4.8	9.8	3		61.5599	6.66667		61.1433	38.18	44.1725	43.92	38.5273	0.44	0.7175	0.396	0.456082	0.0118379	2017	2	1088.42	1182.11	1245.19
NIA_EDS19_cal4	NIA_EDS19_4	calibration						Mozambique	4702.55	14.9855	104.345	1.14014	4263.46	13.1768	104.062	0.766516	1583.8	1.7843	24.603	0.284767	0.976174
NIA_EDS19_cal5	NIA_EDS19_5	calibration						Mozambique	4739.71	15.1666	102.336	1.13749	4277.41	13.3413	102.124	0.791359	1584.51	1.80149	24.0768	0.293168	0.976682
NIA_EDS19_27A	NIA_EDS19_5	2019-06-25 13:42:03	34.78	26.17	41.0002	-12.1139	37.2509	Mozambique	1096.91	2.73944	32.2226	0.377666	634.607	0.914156	32.0107	0.031537	1548.77	0.813248	49.7204	0.0769719	0.95198	1.14499	1.61521	0.306353	43.6883	3.9736	520	6.83	10.73	2.11	70.96	34.0441	15.8746	3.54114	22.8268	44.59	44.64	47.6	44.917	0.22	0.53	0.62	0.423243	0.00942277	2017	2	1063.03	1005.12	1068.22
NIA_EDS19_27B	NIA_EDS19_5	2019-06-25 13:42:50	38.44	26.93	49.5584	-12.1138	37.2507	Mozambique	1009.28	2.62525	27.47	0.381364	546.984	0.799962	27.2581	0.0352353	1549.61	0.826112	49.1475	0.0998289	0.952532	1.14499	1.61521	0.306353	43.6883	3.9736	520	6.83	10.73	2.11	70.96	34.0441	15.8746	3.54114	22.8268	44.59	44.64	47.6	44.917	0.22	0.53	0.62	0.423243	0.00942277	2017	2	1063.03	1005.12	1068.22
NIA_EDS19_27C	NIA_EDS19_5	2019-06-25 13:43:31	36.55	26.08	45.2474	-12.1138	37.2509	Mozambique	749.183	2.57497	20.1372	0.365823	286.883	0.749686	19.9253	0.0196942	1511.14	1.43946	66.7977	0.103745	0.935056	1.14499	1.61521	0.306353	43.6883	3.9736	520	6.83	10.73	2.11	70.96	34.0441	15.8746	3.54114	22.8268	44.59	44.64	47.6	44.917	0.22	0.53	0.62	0.423243	0.00942277	2017	2	1063.03	1005.12	1068.22
NIA_EDS19_27D	NIA_EDS19_5	2019-06-25 13:44:10	35.27	25.59	42.4565	-12.1138	37.2509	Mozambique	686.175	2.55045	19.2306	0.361673	223.875	0.725162	19.0187	0.0155441	1483.78	1.75193	80.2231	0.103028	0.9217	1.14499	1.61521	0.306353	43.6883	3.9736	520	6.83	10.73	2.11	70.96	34.0441	15.8746	3.54114	22.8268	44.59	44.64	47.6	44.917	0.22	0.53	0.62	0.423243	0.00942277	2017	2	1063.03	1005.12	1068.22
NIA_EDS19_28A	NIA_EDS19_5	2019-06-25 13:47:04	33.36	26.79	37.5669	-12.1139	37.2509	Mozambique	546.271	2.23752	9.60357	0.356088	83.9711	0.412236	9.39166	0.00995886	1435.28	2.56846	102.166	0.170233	0.899407	1.14499	1.61521	0.306353	43.6883	3.9736	520	6.83	10.73	2.11	70.96	34.0441	15.8746	3.54114	22.8268	44.59	44.64	47.6	44.917	0.22	0.53	0.62	0.423243	0.00942277	2017	2	1063.03	1005.12	1068.22
NIA_EDS19_28B	NIA_EDS19_5	2019-06-25 13:48:17	33.66	26.96	38.1133	-12.1139	37.2509	Mozambique	848.443	2.19722	15.2143	0.362211	386.144	0.371937	15.0024	0.0160818	1571.04	0.551604	38.8467	0.0654339	0.962601	1.14499	1.61521	0.306353	43.6883	3.9736	520	6.83	10.73	2.11	70.96	34.0441	15.8746	3.54114	22.8268	44.59	44.64	47.6	44.917	0.22	0.53	0.62	0.423243	0.00942277	2017	2	1063.03	1005.12	1068.22
NIA_EDS19_29A	NIA_EDS19_5	2019-06-25 13:52:02	41.08	24.33	59.0898	-12.1136	37.251	Mozambique	755.084	2.58888	21.3559	0.367997	292.785	0.763589	21.144	0.0218682	1506.91	1.43258	69.2602	0.112559	0.932647	1.14499	1.61521	0.306353	43.6883	3.9736	520	6.83	10.73	2.11	70.96	34.0441	15.8746	3.54114	22.8268	44.59	44.64	47.6	44.917	0.22	0.53	0.62	0.423243	0.00942277	2017	2	1063.03	1005.12	1068.22
NIA_EDS19_29B	NIA_EDS19_5	2019-06-25 13:52:41	36.65	23.01	47.3848	-12.1136	37.2511	Mozambique	1039.49	3.38992	37.8985	0.381419	577.19	1.56463	37.6866	0.0352902	1516.99	1.49898	63.0386	0.0927571	0.938709	1.14499	1.61521	0.306353	43.6883	3.9736	520	6.83	10.73	2.11	70.96	34.0441	15.8746	3.54114	22.8268	44.59	44.64	47.6	44.917	0.22	0.53	0.62	0.423243	0.00942277	2017	2	1063.03	1005.12	1068.22
NIA_EDS19_29C	NIA_EDS19_5	2019-06-25 13:54:52	36.67	22.13	47.9787	-12.1137	37.2511	Mozambique	659.627	2.54238	17.4207	0.362568	197.327	0.717095	17.2088	0.0164387	1478.06	1.95795	82.0372	0.123141	0.919786	1.14499	1.61521	0.306353	43.6883	3.9736	520	6.83	10.73	2.11	70.96	34.0441	15.8746	3.54114	22.8268	44.59	44.64	47.6	44.917	0.22	0.53	0.62	0.423243	0.00942277	2017	2	1063.03	1005.12	1068.22
NIA_EDS19_29D	NIA_EDS19_5	2019-06-25 13:55:34	37.88	22.61	50.9246	-12.1135	37.2512	Mozambique	814.197	3.19976	30.4886	0.371649	351.898	1.37447	30.2767	0.0255201	1478.16	2.10457	80.9416	0.107206	0.920778	1.14499	1.61521	0.306353	43.6883	3.9736	520	6.83	10.73	2.11	70.96	34.0441	15.8746	3.54114	22.8268	44.59	44.64	47.6	44.917	0.22	0.53	0.62	0.423243	0.00942277	2017	2	1063.03	1005.12	1068.22
NIA_EDS19_30B	NIA_EDS19_5	2019-06-25 13:56:53	41	23.48	59.5012	-12.1135	37.2513	Mozambique	1734.37	5.63629	93.5603	0.453786	1272.07	3.811	93.3484	0.107657	1502.72	1.64108	70.1832	0.127187	0.931634	1.14499	1.61521	0.306353	43.6883	3.9736	520	6.83	10.73	2.11	70.96	34.0441	15.8746	3.54114	22.8268	44.59	44.64	47.6	44.917	0.22	0.53	0.62	0.423243	0.00942277	2017	2	1063.03	1005.12	1068.22
NIA_EDS19_30C	NIA_EDS19_5	2019-06-25 14:00:29	36.32	20.38	48.1273	-12.1134	37.2512	Mozambique	962.605	2.87708	30.2139	0.385192	500.305	1.0518	30.002	0.0390636	1529.21	1.17188	58.3632	0.119408	0.943425	1.14499	1.61521	0.306353	43.6883	3.9736	520	6.83	10.73	2.11	70.96	34.0441	15.8746	3.54114	22.8268	44.59	44.64	47.6	44.917	0.22	0.53	0.62	0.423243	0.00942277	2017	2	1063.03	1005.12	1068.22
NIA_EDS19_30D	NIA_EDS19_5	2019-06-25 14:01:19	37.54	21.77	50.5377	-12.1133	37.2511	Mozambique	857.457	4.07711	41.5566	0.37193	395.158	2.25182	41.3447	0.0258012	1440.92	2.99311	95.95	0.0940887	0.905282	1.14499	1.61521	0.306353	43.6883	3.9736	520	6.83	10.73	2.11	70.96	34.0441	15.8746	3.54114	22.8268	44.59	44.64	47.6	44.917	0.22	0.53	0.62	0.423243	0.00942277	2017	2	1063.03	1005.12	1068.22
NIA_EDS19_31A	NIA_EDS19_5	2019-06-25 14:02:00	37.01	22.01	48.9519	-12.1132	37.2511	Mozambique	922.251	3.02736	30.9553	0.383797	459.952	1.20207	30.7434	0.0376683	1515.19	1.44347	64.456	0.124097	0.937347	1.14499	1.61521	0.306353	43.6883	3.9736	520	6.83	10.73	2.11	70.96	34.0441	15.8746	3.54114	22.8268	44.59	44.64	47.6	44.917	0.22	0.53	0.62	0.423243	0.00942277	2017	2	1063.03	1005.12	1068.22
NIA_EDS19_31D	NIA_EDS19_5	2019-06-25 14:06:26	41.97	24.58	61.7233	-12.114	37.2515	Mozambique	619.428	2.45246	13.6276	0.350889	157.128	0.627173	13.4157	0.00475997	1478.63	2.15135	80.348	0.0447959	0.921336	1.14499	1.61521	0.306353	43.6883	3.9736	520	6.83	10.73	2.11	70.96	34.0441	15.8746	3.54114	22.8268	44.59	44.64	47.6	44.917	0.22	0.53	0.62	0.423243	0.00942277	2017	2	1063.03	1005.12	1068.22
NIA_EDS19_32A	NIA_EDS19_5	2019-06-25 14:07:17	37.15	21.64	49.5604	-12.1138	37.2515	Mozambique	1164.8	3.70592	47.526	0.404717	702.498	1.88063	47.3141	0.0585881	1514	1.47742	64.8975	0.126276	0.936899	1.14499	1.61521	0.306353	43.6883	3.9736	520	6.83	10.73	2.11	70.96	34.0441	15.8746	3.54114	22.8268	44.59	44.64	47.6	44.917	0.22	0.53	0.62	0.423243	0.00942277	2017	2	1063.03	1005.12	1068.22
NIA_EDS19_32B	NIA_EDS19_5	2019-06-25 14:08:07	39.65	22.75	55.9083	-12.1139	37.2516	Mozambique	768.395	2.84196	22.8868	0.365303	306.096	1.01667	22.6749	0.0191736	1499.66	1.81566	70.7029	0.0939438	0.931031	1.14499	1.61521	0.306353	43.6883	3.9736	520	6.83	10.73	2.11	70.96	34.0441	15.8746	3.54114	22.8268	44.59	44.64	47.6	44.917	0.22	0.53	0.62	0.423243	0.00942277	2017	2	1063.03	1005.12	1068.22
NIA_EDS19_32C	NIA_EDS19_5	2019-06-25 14:14:04	38.78	19.94	55.3022	-12.1135	37.2518	Mozambique	652.491	2.4057	13.8793	0.356343	190.191	0.580409	13.6674	0.0102146	1504.71	1.67385	68.8184	0.0808186	0.932956	1.14499	1.61521	0.306353	43.6883	3.9736	520	6.83	10.73	2.11	70.96	34.0441	15.8746	3.54114	22.8268	44.59	44.64	47.6	44.917	0.22	0.53	0.62	0.423243	0.00942277	2017	2	1063.03	1005.12	1068.22
NIA_EDS19_32D	NIA_EDS19_5	2019-06-25 14:15:10	36.17	20.09	47.9074	-12.1135	37.2518	Mozambique	1105.95	3.62941	43.4818	0.398162	643.649	1.80413	43.2699	0.0520332	1513.4	1.5463	64.7513	0.122353	0.937009	1.14499	1.61521	0.306353	43.6883	3.9736	520	6.83	10.73	2.11	70.96	34.0441	15.8746	3.54114	22.8268	44.59	44.64	47.6	44.917	0.22	0.53	0.62	0.423243	0.00942277	2017	2	1063.03	1005.12	1068.22
NIA_EDS19_33A	NIA_EDS19_5	2019-06-25 14:15:50	35.37	20.34	45.7033	-12.1134	37.2518	Mozambique	1249.16	4.10474	51.4229	0.396121	786.861	2.27945	51.211	0.0499923	1516.14	1.60101	62.8005	0.096333	0.938894	1.14499	1.61521	0.306353	43.6883	3.9736	520	6.83	10.73	2.11	70.96	34.0441	15.8746	3.54114	22.8268	44.59	44.64	47.6	44.917	0.22	0.53	0.62	0.423243	0.00942277	2017	2	1063.03	1005.12	1068.22
NIA_EDS19_33B	NIA_EDS19_5	2019-06-25 14:19:33	34.85	23.44	42.6813	-12.1135	37.2518	Mozambique	629.088	2.08706	5.96744	0.355559	166.789	0.261772	5.75553	0.00943013	1574.21	0.900619	34.5732	0.0890112	0.966643	1.14499	1.61521	0.306353	43.6883	3.9736	520	6.83	10.73	2.11	70.96	34.0441	15.8746	3.54114	22.8268	44.59	44.64	47.6	44.917	0.22	0.53	0.62	0.423243	0.00942277	2017	2	1063.03	1005.12	1068.22
NIA_EDS19_33C	NIA_EDS19_5	2019-06-25 14:20:10	35.34	22.81	44.213	-12.1135	37.2518	Mozambique	672.873	2.2158	4.52918	0.353667	210.574	0.390515	4.31727	0.00753784	1596.08	1.07897	20.8265	0.0571383	0.979909	1.14499	1.61521	0.306353	43.6883	3.9736	520	6.83	10.73	2.11	70.96	34.0441	15.8746	3.54114	22.8268	44.59	44.64	47.6	44.917	0.22	0.53	0.62	0.423243	0.00942277	2017	2	1063.03	1005.12	1068.22
NIA_EDS19_34A	NIA_EDS19_5	2019-06-25 14:21:29	50.67	26.14	94.1686	-12.1135	37.2518	Mozambique	587.742	2.08913	6.1491	0.353807	125.443	0.263846	5.93719	0.00767795	1549.48	1.18799	46.6743	0.094845	0.954809	1.14499	1.61521	0.306353	43.6883	3.9736	520	6.83	10.73	2.11	70.96	34.0441	15.8746	3.54114	22.8268	44.59	44.64	47.6	44.917	0.22	0.53	0.62	0.423243	0.00942277	2017	2	1063.03	1005.12	1068.22
NIA_EDS19_34B	NIA_EDS19_5	2019-06-25 14:24:19	44.63	23.09	72.2892	-12.1136	37.2519	Mozambique	1456.33	3.57208	52.024	0.446283	994.034	1.74679	51.8121	0.100154	1543.98	0.98901	51.2186	0.155574	0.950459	1.14499	1.61521	0.306353	43.6883	3.9736	520	6.83	10.73	2.11	70.96	34.0441	15.8746	3.54114	22.8268	44.59	44.64	47.6	44.917	0.22	0.53	0.62	0.423243	0.00942277	2017	2	1063.03	1005.12	1068.22
NIA_EDS19_34C	NIA_EDS19_5	2019-06-25 14:25:07	40.5	22.9	58.3841	-12.1135	37.2519	Mozambique	1795.06	6.25535	103.175	0.471236	1332.76	4.43006	102.963	0.125107	1494.82	1.8112	73.4979	0.14033	0.928285	1.14499	1.61521	0.306353	43.6883	3.9736	520	6.83	10.73	2.11	70.96	34.0441	15.8746	3.54114	22.8268	44.59	44.64	47.6	44.917	0.22	0.53	0.62	0.423243	0.00942277	2017	2	1063.03	1005.12	1068.22
NIA_EDS19_34D	NIA_EDS19_5	2019-06-25 14:26:00	36.29	21.27	47.5112	-12.1134	37.2519	Mozambique	1158.02	4.38799	58.1481	0.415413	695.719	2.5627	57.9362	0.0692842	1483.6	1.99206	78.6304	0.147757	0.923126	1.14499	1.61521	0.306353	43.6883	3.9736	520	6.83	10.73	2.11	70.96	34.0441	15.8746	3.54114	22.8268	44.59	44.64	47.6	44.917	0.22	0.53	0.62	0.423243	0.00942277	2017	2	1063.03	1005.12	1068.22
NIA_EDS19_35A	NIA_EDS19_5	2019-06-25 14:29:27	35.96	22.56	45.895	-12.1136	37.2519	Mozambique	1534.53	2.99172	41.0264	0.441265	1072.23	1.16643	40.8145	0.0951358	1571.51	0.623172	38.0714	0.139445	0.963331	1.14499	1.61521	0.306353	43.6883	3.9736	520	6.83	10.73	2.11	70.96	34.0441	15.8746	3.54114	22.8268	44.59	44.64	47.6	44.917	0.22	0.53	0.62	0.423243	0.00942277	2017	2	1063.03	1005.12	1068.22
NIA_EDS19_35C	NIA_EDS19_5	2019-06-25 14:31:15	35.7	23.42	44.7417	-12.1134	37.2518	Mozambique	657.92	2.39033	14.9173	0.341596	195.62	0.565047	14.7054	-0.00453284	1500.65	1.58005	71.7958	-0.0347749	0.930083	1.14499	1.61521	0.306353	43.6883	3.9736	520	6.83	10.73	2.11	70.96	34.0441	15.8746	3.54114	22.8268	44.59	44.64	47.6	44.917	0.22	0.53	0.62	0.423243	0.00942277	2017	2	1063.03	1005.12	1068.22
NIA_EDS19_36A	NIA_EDS19_5	2019-06-25 14:38:37	35.77	26.08	43.3541	-12.1136	37.2519	Mozambique	1001.94	2.53427	25.032	0.376619	539.64	0.708982	24.8201	0.0304901	1556.87	0.745595	45.573	0.0879702	0.956029	1.14499	1.61521	0.306353	43.6883	3.9736	520	6.83	10.73	2.11	70.96	34.0441	15.8746	3.54114	22.8268	44.59	44.64	47.6	44.917	0.22	0.53	0.62	0.423243	0.00942277	2017	2	1063.03	1005.12	1068.22
NIA_EDS19_36B	NIA_EDS19_5	2019-06-25 14:39:30	36.27	25.93	44.6501	-12.1136	37.2519	Mozambique	889.162	3.2632	36.9997	0.371735	426.862	1.43791	36.7878	0.0256064	1481.17	1.81874	81.2414	0.0888575	0.920656	1.14499	1.61521	0.306353	43.6883	3.9736	520	6.83	10.73	2.11	70.96	34.0441	15.8746	3.54114	22.8268	44.59	44.64	47.6	44.917	0.22	0.53	0.62	0.423243	0.00942277	2017	2	1063.03	1005.12	1068.22
NIA_EDS19_36C	NIA_EDS19_5	2019-06-25 14:40:17	34.08	25.02	40.0522	-12.1136	37.2519	Mozambique	689.154	2.3776	15.8935	0.35113	226.855	0.552309	15.6816	0.00500076	1512.76	1.34254	66.5533	0.0333495	0.935343	1.14499	1.61521	0.306353	43.6883	3.9736	520	6.83	10.73	2.11	70.96	34.0441	15.8746	3.54114	22.8268	44.59	44.64	47.6	44.917	0.22	0.53	0.62	0.423243	0.00942277	2017	2	1063.03	1005.12	1068.22
NIA_EDS19_37A	NIA_EDS19_5	2019-06-25 14:40:52	36.08	27.09	43.4957	-12.1136	37.252	Mozambique	944.235	3.30003	37.4414	0.375806	481.935	1.47474	37.2295	0.0296767	1496.44	1.6692	73.5724	0.0921543	0.92829	1.14499	1.61521	0.306353	43.6883	3.9736	520	6.83	10.73	2.11	70.96	34.0441	15.8746	3.54114	22.8268	44.59	44.64	47.6	44.917	0.22	0.53	0.62	0.423243	0.00942277	2017	2	1063.03	1005.12	1068.22
NIA_EDS19_37B	NIA_EDS19_5	2019-06-25 14:40:17	34.08	25.02	40.0522	-12.1136	37.2519	Mozambique	753.807	3.28412	25.1208	0.361949	291.508	1.45883	24.9089	0.0158199	1472.5	2.68614	80.0785	0.0799168	0.921278	1.14499	1.61521	0.306353	43.6883	3.9736	520	6.83	10.73	2.11	70.96	34.0441	15.8746	3.54114	22.8268	44.59	44.64	47.6	44.917	0.22	0.53	0.62	0.423243	0.00942277	2017	2	1063.03	1005.12	1068.22
NIA_EDS19_37C	NIA_EDS19_5	2019-06-25 14:40:05	34.64	25.23	41.2015	-12.1136	37.2519	Mozambique	1051.37	2.77359	28.5383	0.385149	589.073	0.948307	28.3264	0.0390202	1551.49	0.910437	47.4819	0.102778	0.95412	1.14499	1.61521	0.306353	43.6883	3.9736	520	6.83	10.73	2.11	70.96	34.0441	15.8746	3.54114	22.8268	44.59	44.64	47.6	44.917	0.22	0.53	0.62	0.423243	0.00942277	2017	2	1063.03	1005.12	1068.22
NIA_EDS19_cal6	NIA_EDS19_6	calibration						Mozambique	4738.78	15.0804	100.895	1.11127	4281.89	13.2446	100.626	0.787935	1585.32	1.78748	23.7109	0.291744	0.977039
NIA_EDS19_38B	NIA_EDS19_6	2019-06-26 12:16:31	40.42	19.76	60.5043	-12.1307	37.4325	Mozambique	935.078	7.04952	65.6738	0.366283	478.193	5.21368	65.4046	0.0429492	1238.96	4.924	107.85	0.111285	0.879682	4.1246	0.311005	0.138363	93.7033	10.2985	160	5	14.75	1.25	61.1039	57.2581	36.7876	11.5702	55.586	40.02	44.1725	50.67	40.6245	0.45	0.7175	0.2	0.460626	0.0113386	2017	2	1075.36	1182.11	1245.19
NIA_EDS19_38C	NIA_EDS19_6	2019-06-26 12:17:12	38.49	17.81	55.8943	-12.1308	37.4325	Mozambique	1094.56	5.64188	56.1228	0.378693	637.678	3.80604	55.8536	0.0553595	1323.81	2.88018	73.7961	0.114933	0.919465	4.1246	0.311005	0.138363	93.7033	10.2985	160	5	14.75	1.25	61.1039	57.2581	36.7876	11.5702	55.586	40.02	44.1725	50.67	40.6245	0.45	0.7175	0.2	0.460626	0.0113386	2017	2	1075.36	1182.11	1245.19
NIA_EDS19_39A	NIA_EDS19_6	2019-06-26 12:19:37	37.3	18.86	51.7389	-12.1307	37.4326	Mozambique	1050.64	5.92737	59.1934	0.377178	593.758	4.09154	58.9242	0.0538441	1303.94	3.27534	82.357	0.118255	0.90972	4.1246	0.311005	0.138363	93.7033	10.2985	160	5	14.75	1.25	61.1039	57.2581	36.7876	11.5702	55.586	40.02	44.1725	50.67	40.6245	0.45	0.7175	0.2	0.460626	0.0113386	2017	2	1075.36	1182.11	1245.19
NIA_EDS19_39B	NIA_EDS19_6	2019-06-26 12:20:14	36.32	19.86	48.4416	-12.1303	37.4323	Mozambique	807.94	4.52348	41.9896	0.361096	351.055	2.68764	41.7204	0.0377627	1275.69	3.56009	96.4884	0.137234	0.89378	4.1246	0.311005	0.138363	93.7033	10.2985	160	5	14.75	1.25	61.1039	57.2581	36.7876	11.5702	55.586	40.02	44.1725	50.67	40.6245	0.45	0.7175	0.2	0.460626	0.0113386	2017	2	1075.36	1182.11	1245.19
NIA_EDS19_39C	NIA_EDS19_6	2019-06-26 12:20:58	36.74	20.75	49.0159	-12.1304	37.4324	Mozambique	797.618	4.82594	42.4363	0.357834	340.733	2.9901	42.1671	0.0345004	1264.3	4.04429	99.5788	0.128024	0.889874	4.1246	0.311005	0.138363	93.7033	10.2985	160	5	14.75	1.25	61.1039	57.2581	36.7876	11.5702	55.586	40.02	44.1725	50.67	40.6245	0.45	0.7175	0.2	0.460626	0.0113386	2017	2	1075.36	1182.11	1245.19
NIA_EDS19_39D	NIA_EDS19_6	2019-06-26 12:21:35	35.7	20.48	46.4594	-12.1303	37.4325	Mozambique	673.112	3.56297	26.2969	0.345451	216.227	1.72713	26.0277	0.0221174	1272.2	3.70418	97.4625	0.13014	0.892561	4.1246	0.311005	0.138363	93.7033	10.2985	160	5	14.75	1.25	61.1039	57.2581	36.7876	11.5702	55.586	40.02	44.1725	50.67	40.6245	0.45	0.7175	0.2	0.460626	0.0113386	2017	2	1075.36	1182.11	1245.19
NIA_EDS19_40A	NIA_EDS19_6	2019-06-26 12:23:57	34.5	20.83	43.2888	-12.1305	37.4325	Mozambique	1922.64	8.10605	108.493	0.433081	1465.76	6.27022	108.224	0.109748	1351.38	2.10726	63.503	0.10119	0.931242	4.1246	0.311005	0.138363	93.7033	10.2985	160	5	14.75	1.25	61.1039	57.2581	36.7876	11.5702	55.586	40.02	44.1725	50.67	40.6245	0.45	0.7175	0.2	0.460626	0.0113386	2017	2	1075.36	1182.11	1245.19
NIA_EDS19_40B	NIA_EDS19_6	2019-06-26 12:24:42	37.54	20.83	51.145	-12.1303	37.4323	Mozambique	680.439	2.63554	20.3679	0.344622	223.554	0.799704	20.0987	0.0212885	1333.51	1.73886	76.3026	0.126996	0.917511	4.1246	0.311005	0.138363	93.7033	10.2985	160	5	14.75	1.25	61.1039	57.2581	36.7876	11.5702	55.586	40.02	44.1725	50.67	40.6245	0.45	0.7175	0.2	0.460626	0.0113386	2017	2	1075.36	1182.11	1245.19
NIA_EDS19_40C	NIA_EDS19_6	2019-06-26 12:25:20	35.44	21.42	45.2579	-12.1302	37.4324	Mozambique	823.328	3.44431	23.383	0.345605	366.443	1.60847	23.1138	0.0222711	1365.62	2.18503	54.8215	0.0830029	0.940666	4.1246	0.311005	0.138363	93.7033	10.2985	160	5	14.75	1.25	61.1039	57.2581	36.7876	11.5702	55.586	40.02	44.1725	50.67	40.6245	0.45	0.7175	0.2	0.460626	0.0113386	2017	2	1075.36	1182.11	1245.19
NIA_EDS19_40D	NIA_EDS19_6	2019-06-26 12:26:10	34.69	21.14	43.5758	-12.1307	37.4328	Mozambique	1125.71	7.52106	59.1034	0.361786	668.825	5.68522	58.8342	0.0384529	1310.05	4.05923	73.3436	0.0753242	0.919146	4.1246	0.311005	0.138363	93.7033	10.2985	160	5	14.75	1.25	61.1039	57.2581	36.7876	11.5702	55.586	40.02	44.1725	50.67	40.6245	0.45	0.7175	0.2	0.460626	0.0113386	2017	2	1075.36	1182.11	1245.19
NIA_EDS19_41B	NIA_EDS19_6	2019-06-26 12:28:58	34.2	22.51	41.6701	-12.1306	37.433	Mozambique	756.156	5.67155	51.5295	0.353857	299.271	3.83571	51.2603	0.0305237	1192.25	5.57018	129.969	0.12161	0.853764	4.1246	0.311005	0.138363	93.7033	10.2985	160	5	14.75	1.25	61.1039	57.2581	36.7876	11.5702	55.586	40.02	44.1725	50.67	40.6245	0.45	0.7175	0.2	0.460626	0.0113386	2017	2	1075.36	1182.11	1245.19
NIA_EDS19_41C	NIA_EDS19_6	2019-06-26 12:29:41	32.74	21.79	38.7614	-12.1303	37.4328	Mozambique	583.945	2.75651	16.9671	0.339912	127.06	0.920677	16.6979	0.016578	1262.52	3.3347	105.596	0.164737	0.883848	4.1246	0.311005	0.138363	93.7033	10.2985	160	5	14.75	1.25	61.1039	57.2581	36.7876	11.5702	55.586	40.02	44.1725	50.67	40.6245	0.45	0.7175	0.2	0.460626	0.0113386	2017	2	1075.36	1182.11	1245.19
NIA_EDS19_41D	NIA_EDS19_6	2019-06-26 12:30:25	33.59	22.97	40.0385	-12.1299	37.4321	Mozambique	758.765	3.35438	33.1468	0.346311	301.88	1.51854	32.8776	0.0229771	1301.21	2.38594	90.1921	0.0990458	0.901787	4.1246	0.311005	0.138363	93.7033	10.2985	160	5	14.75	1.25	61.1039	57.2581	36.7876	11.5702	55.586	40.02	44.1725	50.67	40.6245	0.45	0.7175	0.2	0.460626	0.0113386	2017	2	1075.36	1182.11	1245.19
NIA_EDS19_42A	NIA_EDS19_6	2019-06-26 12:32:14	35.93	23.59	45.2101	-12.1303	37.4326	Mozambique	1304.46	4.99179	62.7276	0.389229	847.575	3.15595	62.4584	0.0658952	1354.64	1.83864	63.5322	0.105325	0.931367	4.1246	0.311005	0.138363	93.7033	10.2985	160	5	14.75	1.25	61.1039	57.2581	36.7876	11.5702	55.586	40.02	44.1725	50.67	40.6245	0.45	0.7175	0.2	0.460626	0.0113386	2017	2	1075.36	1182.11	1245.19
NIA_EDS19_42C	NIA_EDS19_6	2019-06-26 12:33:55	33.99	23.95	40.4207	-12.1306	37.433	Mozambique	704.907	6.25945	56.4602	0.352146	248.022	4.42361	56.191	0.0288122	1116.95	7.26173	161.052	0.129762	0.815291	4.1246	0.311005	0.138363	93.7033	10.2985	160	5	14.75	1.25	61.1039	57.2581	36.7876	11.5702	55.586	40.02	44.1725	50.67	40.6245	0.45	0.7175	0.2	0.460626	0.0113386	2017	2	1075.36	1182.11	1245.19
NIA_EDS19_42D	NIA_EDS19_6	2019-06-26 12:34:35	33.48	25.9	38.2796	-12.1306	37.4331	Mozambique	692.288	4.32251	36.3406	0.344181	235.403	2.48667	36.0714	0.0208474	1221.86	4.70488	119.16	0.108216	0.867128	4.1246	0.311005	0.138363	93.7033	10.2985	160	5	14.75	1.25	61.1039	57.2581	36.7876	11.5702	55.586	40.02	44.1725	50.67	40.6245	0.45	0.7175	0.2	0.460626	0.0113386	2017	2	1075.36	1182.11	1245.19
NIA_EDS19_43A	NIA_EDS19_6	2019-06-26 12:38:00	31.76	23.75	35.7579	-12.1304	37.4329	Mozambique	994.305	2.59836	12.4103	0.331565	537.42	0.762523	12.141	0.00823194	1443.04	0.74634	20.748	0.0221052	0.977908	4.1246	0.311005	0.138363	93.7033	10.2985	160	5	14.75	1.25	61.1039	57.2581	36.7876	11.5702	55.586	40.02	44.1725	50.67	40.6245	0.45	0.7175	0.2	0.460626	0.0113386	2017	2	1075.36	1182.11	1245.19
NIA_EDS19_43B	NIA_EDS19_6	2019-06-26 12:38:55	30.74	23.74	33.7487	-12.1305	37.433	Mozambique	860.103	6.58864	65.6663	0.360684	403.218	4.7528	65.3971	0.0373507	1206.52	5.18401	124.541	0.11177	0.860446	4.1246	0.311005	0.138363	93.7033	10.2985	160	5	14.75	1.25	61.1039	57.2581	36.7876	11.5702	55.586	40.02	44.1725	50.67	40.6245	0.45	0.7175	0.2	0.460626	0.0113386	2017	2	1075.36	1182.11	1245.19
NIA_EDS19_43C	NIA_EDS19_6	2019-06-26 12:39:39	32.65	26.19	36.3962	-12.1304	37.433	Mozambique	954.688	6.89435	72.9152	0.371473	497.803	5.05851	72.646	0.0481392	1231.91	4.56317	114.417	0.119138	0.872651	4.1246	0.311005	0.138363	93.7033	10.2985	160	5	14.75	1.25	61.1039	57.2581	36.7876	11.5702	55.586	40.02	44.1725	50.67	40.6245	0.45	0.7175	0.2	0.460626	0.0113386	2017	2	1075.36	1182.11	1245.19
NIA_EDS19_43D	NIA_EDS19_6	2019-06-26 12:40:28	35.06	27.39	40.9519	-12.1305	37.4329	Mozambique	1103.38	7.80417	87.1935	0.416563	646.494	5.96833	86.9243	0.09323	1249.47	4.20468	106.92	0.180196	0.881481	4.1246	0.311005	0.138363	93.7033	10.2985	160	5	14.75	1.25	61.1039	57.2581	36.7876	11.5702	55.586	40.02	44.1725	50.67	40.6245	0.45	0.7175	0.2	0.460626	0.0113386	2017	2	1075.36	1182.11	1245.19
NIA_EDS19_44A	NIA_EDS19_6	2019-06-26 12:42:42	33.09	25.29	37.7614	-12.1304	37.4328	Mozambique	815.229	5.80389	55.6694	0.349588	358.344	3.96805	55.4002	0.0262544	1218.04	4.91654	119.848	0.0892469	0.8661	4.1246	0.311005	0.138363	93.7033	10.2985	160	5	14.75	1.25	61.1039	57.2581	36.7876	11.5702	55.586	40.02	44.1725	50.67	40.6245	0.45	0.7175	0.2	0.460626	0.0113386	2017	2	1075.36	1182.11	1245.19
NIA_EDS19_44B	NIA_EDS19_6	2019-06-26 12:43:41	32.4	24.14	36.8843	-12.1303	37.433	Mozambique	882.335	5.55037	55.5436	0.354143	425.45	3.71454	55.2744	0.0308092	1257.18	4.00104	103.951	0.0910453	0.885019	4.1246	0.311005	0.138363	93.7033	10.2985	160	5	14.75	1.25	61.1039	57.2581	36.7876	11.5702	55.586	40.02	44.1725	50.67	40.6245	0.45	0.7175	0.2	0.460626	0.0113386	2017	2	1075.36	1182.11	1245.19
NIA_EDS19_44C	NIA_EDS19_6	2019-06-26 12:44:19	34.15	27.74	38.7498	-12.1304	37.4328	Mozambique	673.93	3.63531	28.9318	0.338317	217.045	1.79947	28.6625	0.0149834	1256.75	3.7981	105.626	0.0867639	0.883347	4.1246	0.311005	0.138363	93.7033	10.2985	160	5	14.75	1.25	61.1039	57.2581	36.7876	11.5702	55.586	40.02	44.1725	50.67	40.6245	0.45	0.7175	0.2	0.460626	0.0113386	2017	2	1075.36	1182.11	1245.19
NIA_EDS19_45B	NIA_EDS19_6	2019-06-26 12:48:08	33.18	23.96	38.6279	-12.1301	37.4328	Mozambique	880.172	8.0261	75.8814	0.363912	423.287	6.19026	75.6122	0.0405786	1176.87	6.27367	133.795	0.112829	0.848442	4.1246	0.311005	0.138363	93.7033	10.2985	160	5	14.75	1.25	61.1039	57.2581	36.7876	11.5702	55.586	40.02	44.1725	50.67	40.6245	0.45	0.7175	0.2	0.460626	0.0113386	2017	2	1075.36	1182.11	1245.19
NIA_EDS19_45C	NIA_EDS19_6	2019-06-26 12:48:48	36.39	26.96	44.3194	-12.1302	37.4328	Mozambique	1001.47	7.7519	79.7048	0.372149	544.59	5.91606	79.4356	0.0488158	1228.78	4.86585	114.072	0.110153	0.872704	4.1246	0.311005	0.138363	93.7033	10.2985	160	5	14.75	1.25	61.1039	57.2581	36.7876	11.5702	55.586	40.02	44.1725	50.67	40.6245	0.45	0.7175	0.2	0.460626	0.0113386	2017	2	1075.36	1182.11	1245.19
NIA_EDS19_45D	NIA_EDS19_6	2019-06-26 12:51:14	32.47	22.94	37.6158	-12.1303	37.4334	Mozambique	965.105	6.8728	65.0704	0.424776	508.22	5.03697	64.8012	0.101443	1254.4	4.53183	101.795	0.250401	0.886913	4.1246	0.311005	0.138363	93.7033	10.2985	160	5	14.75	1.25	61.1039	57.2581	36.7876	11.5702	55.586	40.02	44.1725	50.67	40.6245	0.45	0.7175	0.2	0.460626	0.0113386	2017	2	1075.36	1182.11	1245.19
NIA_EDS19_46A	NIA_EDS19_6	2019-06-26 12:51:55	31.87	24.22	35.7594	-12.1303	37.4334	Mozambique	741.886	6.76545	63.0079	0.344471	285.001	4.92961	62.7387	0.0211379	1125.03	7.09337	157.62	0.083447	0.819582	4.1246	0.311005	0.138363	93.7033	10.2985	160	5	14.75	1.25	61.1039	57.2581	36.7876	11.5702	55.586	40.02	44.1725	50.67	40.6245	0.45	0.7175	0.2	0.460626	0.0113386	2017	2	1075.36	1182.11	1245.19
NIA_EDS19_46B	NIA_EDS19_6	2019-06-26 12:53:01	33.15	27	0	-12.1302	37.4335	Mozambique	666.44	5.49809	48.377	0.342416	209.555	3.66225	48.1078	0.0190829	1115.49	7.10617	162.982	0.101588	0.813292	4.1246	0.311005	0.138363	93.7033	10.2985	160	5	14.75	1.25	61.1039	57.2581	36.7876	11.5702	55.586	40.02	44.1725	50.67	40.6245	0.45	0.7175	0.2	0.460626	0.0113386	2017	2	1075.36	1182.11	1245.19
NIA_EDS19_46C	NIA_EDS19_6	2019-06-26 12:53:39	32.03	23.87	36.2509	-12.1303	37.4335	Mozambique	631.587	5.10805	41.0364	0.338674	174.702	3.27221	40.7672	0.0153402	1107.31	7.56021	164.452	0.0972374	0.810798	4.1246	0.311005	0.138363	93.7033	10.2985	160	5	14.75	1.25	61.1039	57.2581	36.7876	11.5702	55.586	40.02	44.1725	50.67	40.6245	0.45	0.7175	0.2	0.460626	0.0113386	2017	2	1075.36	1182.11	1245.19
NIA_EDS19_47A	NIA_EDS19_6	2019-06-26 12:56:08	35.09	24.36	42.7316	-12.1301	37.433	Mozambique	886.405	6.97027	63.1814	0.380777	429.52	5.13443	62.9122	0.0574437	1223.14	5.32975	114.021	0.163593	0.872242	4.1246	0.311005	0.138363	93.7033	10.2985	160	5	14.75	1.25	61.1039	57.2581	36.7876	11.5702	55.586	40.02	44.1725	50.67	40.6245	0.45	0.7175	0.2	0.460626	0.0113386	2017	2	1075.36	1182.11	1245.19
NIA_EDS19_47B	NIA_EDS19_6	2019-06-26 12:57:08	31.8	23.3	36.0505	-12.1301	37.433	Mozambique	793.327	3.84679	37.5833	0.351299	336.442	2.01095	37.3141	0.0279655	1293.87	2.81905	91.3293	0.107555	0.900165	4.1246	0.311005	0.138363	93.7033	10.2985	160	5	14.75	1.25	61.1039	57.2581	36.7876	11.5702	55.586	40.02	44.1725	50.67	40.6245	0.45	0.7175	0.2	0.460626	0.0113386	2017	2	1075.36	1182.11	1245.19
NIA_EDS19_47C	NIA_EDS19_6	2019-06-26 12:57:53	32.37	24.59	36.6036	-12.1301	37.433	Mozambique	919.443	4.16449	45.5616	0.353688	462.558	2.32865	45.2924	0.0303546	1315.27	2.41364	81.9653	0.0863181	0.910816	4.1246	0.311005	0.138363	93.7033	10.2985	160	5	14.75	1.25	61.1039	57.2581	36.7876	11.5702	55.586	40.02	44.1725	50.67	40.6245	0.45	0.7175	0.2	0.460626	0.0113386	2017	2	1075.36	1182.11	1245.19
NIA_EDS19_47D	NIA_EDS19_6	2019-06-26 12:58:40	32.92	26.26	36.9174	-12.1303	37.4332	Mozambique	818.337	6.34376	43.7802	0.396264	361.452	4.50792	43.511	0.0729306	1250.63	5.68557	95.815	0.252358	0.892556	4.1246	0.311005	0.138363	93.7033	10.2985	160	5	14.75	1.25	61.1039	57.2581	36.7876	11.5702	55.586	40.02	44.1725	50.67	40.6245	0.45	0.7175	0.2	0.460626	0.0113386	2017	2	1075.36	1182.11	1245.19
NIA_EDS19_48A	NIA_EDS19_6	2019-06-26 13:00:48	31.62	25.3	34.7544	-12.1303	37.4333	Mozambique	1018.14	10.1217	111.552	0.365585	561.256	8.28587	111.282	0.0422512	1156.29	6.22248	145.911	0.0870509	0.834534	4.1246	0.311005	0.138363	93.7033	10.2985	160	5	14.75	1.25	61.1039	57.2581	36.7876	11.5702	55.586	40.02	44.1725	50.67	40.6245	0.45	0.7175	0.2	0.460626	0.0113386	2017	2	1075.36	1182.11	1245.19
NIA_EDS19_48B	NIA_EDS19_6	2019-06-26 13:01:26	34.31	27.63	39.1555	-12.1303	37.4334	Mozambique	864.377	8.6085	45.0881	0.341529	407.492	6.77266	44.8189	0.0181957	1243.22	7.53199	87.0258	0.0555173	0.900911	4.1246	0.311005	0.138363	93.7033	10.2985	160	5	14.75	1.25	61.1039	57.2581	36.7876	11.5702	55.586	40.02	44.1725	50.67	40.6245	0.45	0.7175	0.2	0.460626	0.0113386	2017	2	1075.36	1182.11	1245.19
NIA_EDS19_48C	NIA_EDS19_6	2019-06-26 13:02:04	34.66	28.65	39.3605	-12.1302	37.4334	Mozambique	590.047	3.60598	26.9992	0.337918	133.162	1.77015	26.73	0.0145845	1159.78	5.61983	148.166	0.127032	0.832825	4.1246	0.311005	0.138363	93.7033	10.2985	160	5	14.75	1.25	61.1039	57.2581	36.7876	11.5702	55.586	40.02	44.1725	50.67	40.6245	0.45	0.7175	0.2	0.460626	0.0113386	2017	2	1075.36	1182.11	1245.19
NIA_EDS19_49A	NIA_EDS19_6	2019-06-26 13:05:05	32.15	24.69	36.1043	-12.13	37.4335	Mozambique	788.742	4.80023	47.7533	0.352682	331.857	2.96439	47.484	0.0293482	1240.85	4.0404	112.998	0.109744	0.874825	4.1246	0.311005	0.138363	93.7033	10.2985	160	5	14.75	1.25	61.1039	57.2581	36.7876	11.5702	55.586	40.02	44.1725	50.67	40.6245	0.45	0.7175	0.2	0.460626	0.0113386	2017	2	1075.36	1182.11	1245.19
NIA_EDS19_49B	NIA_EDS19_6	2019-06-26 13:05:55	32.51	26.29	36.0617	-12.1301	37.4336	Mozambique	792.116	4.91673	46.676	0.350354	335.231	3.08089	46.4068	0.0270207	1245.03	4.17093	109.692	0.10036	0.878401	4.1246	0.311005	0.138363	93.7033	10.2985	160	5	14.75	1.25	61.1039	57.2581	36.7876	11.5702	55.586	40.02	44.1725	50.67	40.6245	0.45	0.7175	0.2	0.460626	0.0113386	2017	2	1075.36	1182.11	1245.19
NIA_EDS19_49D	NIA_EDS19_6	2019-06-26 13:07:11	30.96	24.18	33.9774	-12.13	37.4335	Mozambique	646.362	4.67932	39.0043	0.406434	189.477	2.84349	38.7351	0.0831001	1149.18	6.28643	149.518	0.504038	0.830267	4.1246	0.311005	0.138363	93.7033	10.2985	160	5	14.75	1.25	61.1039	57.2581	36.7876	11.5702	55.586	40.02	44.1725	50.67	40.6245	0.45	0.7175	0.2	0.460626	0.0113386	2017	2	1075.36	1182.11	1245.19
NIA_EDS19_50B	NIA_EDS19_6	2019-06-26 13:10:17	32.17	25.75	35.6363	-12.1301	37.4335	Mozambique	820.619	4.88381	48.919	0.355694	363.734	3.04797	48.6498	0.0323601	1254.33	3.83142	106.774	0.111601	0.882028	4.1246	0.311005	0.138363	93.7033	10.2985	160	5	14.75	1.25	61.1039	57.2581	36.7876	11.5702	55.586	40.02	44.1725	50.67	40.6245	0.45	0.7175	0.2	0.460626	0.0113386	2017	2	1075.36	1182.11	1245.19
NIA_EDS19_50C	NIA_EDS19_6	2019-06-26 13:11:03	32.28	26.02	35.7278	-12.13	37.4335	Mozambique	779.823	5.18432	50.5791	0.35903	322.937	3.34848	50.3099	0.0356965	1219.89	4.61072	120.951	0.134852	0.86521	4.1246	0.311005	0.138363	93.7033	10.2985	160	5	14.75	1.25	61.1039	57.2581	36.7876	11.5702	55.586	40.02	44.1725	50.67	40.6245	0.45	0.7175	0.2	0.460626	0.0113386	2017	2	1075.36	1182.11	1245.19
NIA_EDS19_51A	NIA_EDS19_6	2019-06-26 13:14:01	32.95	24.61	37.807	-12.1301	37.4336	Mozambique	595.964	3.08781	23.3682	0.338604	139.079	1.25197	23.099	0.0152703	1214.59	3.98549	128.386	0.133365	0.85757	4.1246	0.311005	0.138363	93.7033	10.2985	160	5	14.75	1.25	61.1039	57.2581	36.7876	11.5702	55.586	40.02	44.1725	50.67	40.6245	0.45	0.7175	0.2	0.460626	0.0113386	2017	2	1075.36	1182.11	1245.19
NIA_EDS19_51B	NIA_EDS19_6	2019-06-26 13:14:43	31.78	23.65	35.8454	-12.13	37.4335	Mozambique	691.285	4.55885	39.4891	0.347959	234.4	2.72301	39.2199	0.0246252	1201.7	5.08871	127.968	0.126254	0.856663	4.1246	0.311005	0.138363	93.7033	10.2985	160	5	14.75	1.25	61.1039	57.2581	36.7876	11.5702	55.586	40.02	44.1725	50.67	40.6245	0.45	0.7175	0.2	0.460626	0.0113386	2017	2	1075.36	1182.11	1245.19
NIA_EDS19_51C	NIA_EDS19_6	2019-06-26 13:15:22	32.88	25.28	37.3241	-12.13	37.4334	Mozambique	989.78	8.08177	81.988	0.369394	532.895	6.24593	81.7188	0.0460605	1216.53	5.19756	118.73	0.105157	0.86704	4.1246	0.311005	0.138363	93.7033	10.2985	160	5	14.75	1.25	61.1039	57.2581	36.7876	11.5702	55.586	40.02	44.1725	50.67	40.6245	0.45	0.7175	0.2	0.460626	0.0113386	2017	2	1075.36	1182.11	1245.19
NIA_EDS19_51D	NIA_EDS19_6	2019-06-26 13:16:00	32.9	25.75	37.131	-12.13	37.4336	Mozambique	683.127	3.57893	31.5215	0.426293	226.242	1.74309	31.2523	0.102959	1252.38	3.51725	110.103	0.569977	0.878629	4.1246	0.311005	0.138363	93.7033	10.2985	160	5	14.75	1.25	61.1039	57.2581	36.7876	11.5702	55.586	40.02	44.1725	50.67	40.6245	0.45	0.7175	0.2	0.460626	0.0113386	2017	2	1075.36	1182.11	1245.19
NIA_EDS19_52A	NIA_EDS19_6	2019-06-26 13:17:58	34.03	24.7	40.1113	-12.1301	37.4334	Mozambique	962.676	3.30031	35.4417	0.390647	505.791	1.46447	35.1725	0.067314	1365.02	1.44068	60.4125	0.181678	0.934982	4.1246	0.311005	0.138363	93.7033	10.2985	160	5	14.75	1.25	61.1039	57.2581	36.7876	11.5702	55.586	40.02	44.1725	50.67	40.6245	0.45	0.7175	0.2	0.460626	0.0113386	2017	2	1075.36	1182.11	1245.19
NIA_EDS19_52B	NIA_EDS19_6	2019-06-26 13:18:43	35.02	24.72	42.3641	-12.1296	37.4333	Mozambique	852.121	3.4989	39.6008	0.358379	395.236	1.66307	39.3315	0.0350458	1317.53	2.02084	83.4451	0.116834	0.909493	4.1246	0.311005	0.138363	93.7033	10.2985	160	5	14.75	1.25	61.1039	57.2581	36.7876	11.5702	55.586	40.02	44.1725	50.67	40.6245	0.45	0.7175	0.2	0.460626	0.0113386	2017	2	1075.36	1182.11	1245.19
NIA_EDS19_52C	NIA_EDS19_6	2019-06-26 13:19:31	35.39	24.84	43.1691	-12.1299	37.4335	Mozambique	1010.79	6.99952	73.3746	0.371101	553.904	5.16369	73.1054	0.0477674	1251.93	4.25429	105.161	0.107971	0.883406	4.1246	0.311005	0.138363	93.7033	10.2985	160	5	14.75	1.25	61.1039	57.2581	36.7876	11.5702	55.586	40.02	44.1725	50.67	40.6245	0.45	0.7175	0.2	0.460626	0.0113386	2017	2	1075.36	1182.11	1245.19
NIA_EDS19_52D	NIA_EDS19_6	2019-06-26 13:20:08	35.75	25.39	43.7107	-12.13	37.4336	Mozambique	822.097	4.26331	25.8594	0.440633	365.212	2.42747	25.5902	0.1173	1343.49	3.2551	59.9129	0.431536	0.934519	4.1246	0.311005	0.138363	93.7033	10.2985	160	5	14.75	1.25	61.1039	57.2581	36.7876	11.5702	55.586	40.02	44.1725	50.67	40.6245	0.45	0.7175	0.2	0.460626	0.0113386	2017	2	1075.36	1182.11	1245.19
NIA_EDS19_53B	NIA_EDS19_6	2019-06-26 13:23:10	35.27	22.87	44.0084	-12.13	37.4334	Mozambique	1384.53	9.67625	118.978	0.411467	927.647	7.84041	118.708	0.0881335	1260.83	3.88448	102.686	0.119797	0.886551	4.1246	0.311005	0.138363	93.7033	10.2985	160	5	14.75	1.25	61.1039	57.2581	36.7876	11.5702	55.586	40.02	44.1725	50.67	40.6245	0.45	0.7175	0.2	0.460626	0.0113386	2017	2	1075.36	1182.11	1245.19
NIA_EDS19_53C	NIA_EDS19_6	2019-06-26 13:23:48	36.84	24.98	46.6535	-12.1299	37.4335	Mozambique	1373.66	6.44666	78.7884	0.408366	916.775	4.61083	78.5192	0.0850325	1331.38	2.44083	72.5724	0.123496	0.92111	4.1246	0.311005	0.138363	93.7033	10.2985	160	5	14.75	1.25	61.1039	57.2581	36.7876	11.5702	55.586	40.02	44.1725	50.67	40.6245	0.45	0.7175	0.2	0.460626	0.0113386	2017	2	1075.36	1182.11	1245.19
NIA_EDS19_53D	NIA_EDS19_6	2019-06-26 13:24:30	35.98	22.04	46.2539	-12.1299	37.4334	Mozambique	786.144	2.82242	26.2485	0.349729	329.259	0.986583	25.9793	0.0263956	1351.52	1.47618	67.8687	0.108354	0.926868	4.1246	0.311005	0.138363	93.7033	10.2985	160	5	14.75	1.25	61.1039	57.2581	36.7876	11.5702	55.586	40.02	44.1725	50.67	40.6245	0.45	0.7175	0.2	0.460626	0.0113386	2017	2	1075.36	1182.11	1245.19
NIA_EDS19_54A	NIA_EDS19_6	2019-06-26 13:28:18	34.43	20.65	43.219	-12.13	37.4338	Mozambique	1049.28	7.6463	80.2584	0.440073	592.395	5.81046	79.9892	0.116739	1246.09	4.45521	107.084	0.245574	0.881036	4.1246	0.311005	0.138363	93.7033	10.2985	160	5	14.75	1.25	61.1039	57.2581	36.7876	11.5702	55.586	40.02	44.1725	50.67	40.6245	0.45	0.7175	0.2	0.460626	0.0113386	2017	2	1075.36	1182.11	1245.19
NIA_EDS19_54B	NIA_EDS19_6	2019-06-26 13:28:57	34.92	20.73	44.3635	-12.13	37.4338	Mozambique	1576.62	15.8294	215.478	0.431076	1119.73	13.9935	215.209	0.107743	1171.73	5.3378	143.328	0.112754	0.838788	4.1246	0.311005	0.138363	93.7033	10.2985	160	5	14.75	1.25	61.1039	57.2581	36.7876	11.5702	55.586	40.02	44.1725	50.67	40.6245	0.45	0.7175	0.2	0.460626	0.0113386	2017	2	1075.36	1182.11	1245.19
NIA_EDS19_54C	NIA_EDS19_6	2019-06-26 13:29:39	37.3	24.6	48.0788	-12.13	37.4338	Mozambique	1145.13	9.91852	111.757	0.387932	688.247	8.08268	111.488	0.0645988	1206.93	5.16671	124.43	0.11329	0.860594	4.1246	0.311005	0.138363	93.7033	10.2985	160	5	14.75	1.25	61.1039	57.2581	36.7876	11.5702	55.586	40.02	44.1725	50.67	40.6245	0.45	0.7175	0.2	0.460626	0.0113386	2017	2	1075.36	1182.11	1245.19
NIA_EDS19_54D	NIA_EDS19_6	2019-06-26 13:30:19	37.39	23.2	49.2116	-12.13	37.4339	Mozambique	1012.42	8.24928	84.1576	0.468536	555.535	6.41344	83.8884	0.145202	1219.92	5.13373	117.241	0.318877	0.868806	4.1246	0.311005	0.138363	93.7033	10.2985	160	5	14.75	1.25	61.1039	57.2581	36.7876	11.5702	55.586	40.02	44.1725	50.67	40.6245	0.45	0.7175	0.2	0.460626	0.0113386	2017	2	1075.36	1182.11	1245.19
NIA_EDS19_cal7	NIA_EDS19_7	calibration						Mozambique	4732.52	15.125	105.159	1.16274	4316.25	13.3164	104.891	0.805017	1584.02	1.78141	24.499	0.295453	0.976275
NIA_EDS19_55A	NIA_EDS19_7	2019-06-27 12:25:41	40.24	22.94	57.553	-12.1257	37.351	Mozambique	1074.84	7.53519	94.5318	0.429792	658.56	5.72662	94.2631	0.0720641	1339.36	4.24542	122.011	0.146572	0.874787	3.41763	0.0253521	0	99.268	8.197	0				78.2431	57.9989	57.7465		57.997	43.81	44.1725	43.92	43.8127	0.35	0.7175	0.396	0.352706	0.00805032	2018	1	1075.36	1160.28	1221.81
NIA_EDS19_55B	NIA_EDS19_7	2019-06-27 12:26:26	38.12	20.3	53.1297	-12.1256	37.3509	Mozambique	826.673	4.81337	51.8734	0.398758	410.396	3.0048	51.6047	0.0410306	1368.55	3.65253	109.522	0.136834	0.888302	3.41763	0.0253521	0	99.268	8.197	0				78.2431	57.9989	57.7465		57.997	43.81	44.1725	43.92	43.8127	0.35	0.7175	0.396	0.352706	0.00805032	2018	1	1075.36	1160.28	1221.81
NIA_EDS19_55C	NIA_EDS19_7	2019-06-27 12:27:03	38.34	20.08	53.9128	-12.1256	37.351	Mozambique	1292.86	9.01293	85.9477	0.416894	876.583	7.20436	85.679	0.0591664	1400.99	4.19719	87.1514	0.0945687	0.910961	3.41763	0.0253521	0	99.268	8.197	0				78.2431	57.9989	57.7465		57.997	43.81	44.1725	43.92	43.8127	0.35	0.7175	0.396	0.352706	0.00805032	2018	1	1075.36	1160.28	1221.81
NIA_EDS19_55D	NIA_EDS19_7	2019-06-27 12:27:43	38.54	21.87	53.2765	-12.1255	37.3509	Mozambique	1491.24	12.4813	42.9743	0.386542	1074.96	10.6727	42.7056	0.0288142	1474.27	5.33553	37.2756	0.0395201	0.96179	3.41763	0.0253521	0	99.268	8.197	0				78.2431	57.9989	57.7465		57.997	43.81	44.1725	43.92	43.8127	0.35	0.7175	0.396	0.352706	0.00805032	2018	1	1075.36	1160.28	1221.81
NIA_EDS19_56B	NIA_EDS19_7	2019-06-27 12:29:54	38.76	18.42	56.2916	-12.1253	37.3509	Mozambique	1696.42	14.8605	178.198	0.444201	1280.14	13.0519	177.929	0.0864732	1336.98	4.96893	118.269	0.0903188	0.877969	3.41763	0.0253521	0	99.268	8.197	0				78.2431	57.9989	57.7465		57.997	43.81	44.1725	43.92	43.8127	0.35	0.7175	0.396	0.352706	0.00805032	2018	1	1075.36	1160.28	1221.81
NIA_EDS19_56C	NIA_EDS19_7	2019-06-27 12:30:32	41.51	19.99	63.9135	-12.1253	37.3509	Mozambique	880.046	7.48325	72.3061	0.394838	463.768	5.67468	72.0374	0.0371104	1307.17	5.83031	129.224	0.104605	0.865553	3.41763	0.0253521	0	99.268	8.197	0				78.2431	57.9989	57.7465		57.997	43.81	44.1725	43.92	43.8127	0.35	0.7175	0.396	0.352706	0.00805032	2018	1	1075.36	1160.28	1221.81
NIA_EDS19_56D	NIA_EDS19_7	2019-06-27 12:31:10	37.35	18.72	51.9692	-12.1253	37.3509	Mozambique	802.64	6.84964	59.3804	0.390916	386.362	5.04107	59.1117	0.0331882	1306.05	6.21168	127.173	0.112196	0.867306	3.41763	0.0253521	0	99.268	8.197	0				78.2431	57.9989	57.7465		57.997	43.81	44.1725	43.92	43.8127	0.35	0.7175	0.396	0.352706	0.00805032	2018	1	1075.36	1160.28	1221.81
NIA_EDS19_57A	NIA_EDS19_7	2019-06-27 12:33:10	35.56	18.97	46.9784	-12.1253	37.3508	Mozambique	1154.18	9.01604	114.401	0.404445	737.902	7.20747	114.132	0.0467179	1319.89	4.69942	129.929	0.0835705	0.866047	3.41763	0.0253521	0	99.268	8.197	0				78.2431	57.9989	57.7465		57.997	43.81	44.1725	43.92	43.8127	0.35	0.7175	0.396	0.352706	0.00805032	2018	1	1075.36	1160.28	1221.81
NIA_EDS19_57B	NIA_EDS19_7	2019-06-27 12:33:49	37.39	19.38	51.6593	-12.1252	37.3509	Mozambique	972.998	10.1743	96.0625	0.397308	556.72	8.36569	95.7938	0.0395809	1274.77	6.98261	139.601	0.0906381	0.853193	3.41763	0.0253521	0	99.268	8.197	0				78.2431	57.9989	57.7465		57.997	43.81	44.1725	43.92	43.8127	0.35	0.7175	0.396	0.352706	0.00805032	2018	1	1075.36	1160.28	1221.81
NIA_EDS19_57C	NIA_EDS19_7	2019-06-27 12:34:27	38.44	22.5	52.563	-12.1252	37.3509	Mozambique	1004.52	9.18721	95.2428	0.390826	588.243	7.37864	94.9741	0.0330986	1298.49	5.93716	133.427	0.073067	0.86099	3.41763	0.0253521	0	99.268	8.197	0				78.2431	57.9989	57.7465		57.997	43.81	44.1725	43.92	43.8127	0.35	0.7175	0.396	0.352706	0.00805032	2018	1	1075.36	1160.28	1221.81
NIA_EDS19_58A	NIA_EDS19_7	2019-06-27 12:37:53	38	19.83	53.0975	-12.1253	37.3505	Mozambique	1093.22	7.50143	37.3129	0.452452	676.942	5.69286	37.0442	0.0947241	1461.02	4.47873	50.884	0.204453	0.948116	3.41763	0.0253521	0	99.268	8.197	0				78.2431	57.9989	57.7465		57.997	43.81	44.1725	43.92	43.8127	0.35	0.7175	0.396	0.352706	0.00805032	2018	1	1075.36	1160.28	1221.81
NIA_EDS19_58B	NIA_EDS19_7	2019-06-27 12:38:47	38.39	21.14	53.3414	-12.125	37.3507	Mozambique	1696.11	19.0953	237.27	0.45753	1279.83	17.2867	237.001	0.0998028	1266.95	6.23793	149.319	0.098805	0.843753	3.41763	0.0253521	0	99.268	8.197	0				78.2431	57.9989	57.7465		57.997	43.81	44.1725	43.92	43.8127	0.35	0.7175	0.396	0.352706	0.00805032	2018	1	1075.36	1160.28	1221.81
NIA_EDS19_58C	NIA_EDS19_7	2019-06-27 12:39:24	40.95	25.91	57.4594	-12.125	37.3509	Mozambique	1201.54	11.5452	124.13	0.430512	785.265	9.73668	123.861	0.0727845	1303.55	5.89171	130.859	0.120831	0.863758	3.41763	0.0253521	0	99.268	8.197	0				78.2431	57.9989	57.7465		57.997	43.81	44.1725	43.92	43.8127	0.35	0.7175	0.396	0.352706	0.00805032	2018	1	1075.36	1160.28	1221.81
NIA_EDS19_58D	NIA_EDS19_7	2019-06-27 12:40:03	38.14	21.25	52.5531	-12.1249	37.3509	Mozambique	1094.58	10.1653	104.372	0.409195	678.302	8.35673	104.103	0.0514678	1308.96	5.87844	127.858	0.0993275	0.866945	3.41763	0.0253521	0	99.268	8.197	0				78.2431	57.9989	57.7465		57.997	43.81	44.1725	43.92	43.8127	0.35	0.7175	0.396	0.352706	0.00805032	2018	1	1075.36	1005.12	1068.22
NIA_EDS19_59A	NIA_EDS19_7	2019-06-27 12:42:29	37.37	19.61	51.456	-12.1251	37.3511	Mozambique	1066.87	13.6113	141.761	0.492417	650.589	11.8027	141.492	0.134689	1212.55	8.01854	167.835	0.251047	0.821366	3.41763	0.0253521	0	99.268	8.197	0				78.2431	57.9989	57.7465		57.997	43.81	44.1725	43.92	43.8127	0.35	0.7175	0.396	0.352706	0.00805032	2018	1	1075.36	1160.28	1221.81
NIA_EDS19_59B	NIA_EDS19_7	2019-06-27 12:43:16	36.32	21.01	47.7465	-12.125	37.3512	Mozambique	1011.13	12.3049	120.536	0.40168	594.847	10.4963	120.267	0.0439522	1230.47	7.91448	158.333	0.0909234	0.831821	3.41763	0.0253521	0	99.268	8.197	0				78.2431	57.9989	57.7465		57.997	43.81	44.1725	43.92	43.8127	0.35	0.7175	0.396	0.352706	0.00805032	2018	1	1075.36	1160.28	1221.81
NIA_EDS19_59C	NIA_EDS19_7	2019-06-27 12:43:55	36.58	22.14	47.7374	-12.1249	37.3512	Mozambique	869.692	10.0551	85.4414	0.390766	453.414	8.24651	85.1727	0.0330384	1243.37	8.2432	148.649	0.0906054	0.841859	3.41763	0.0253521	0	99.268	8.197	0				78.2431	57.9989	57.7465		57.997	43.81	44.1725	43.92	43.8127	0.35	0.7175	0.396	0.352706	0.00805032	2018	1	1075.36	1005.12	1068.22
NIA_EDS19_59D	NIA_EDS19_7	2019-06-27 12:44:32	36.32	22.5	46.8458	-12.1249	37.3512	Mozambique	1893.57	7.09337	12.2721	0.45204	1477.29	5.2848	12.0034	0.0943124	1566.01	2.0421	8.09822	0.099983	0.99194	3.41763	0.0253521	0	99.268	8.197	0				78.2431	57.9989	57.7465		57.997	43.81	44.1725	43.92	43.8127	0.35	0.7175	0.396	0.352706	0.00805032	2018	1	1075.36	1005.12	1068.22
NIA_EDS19_60A	NIA_EDS19_7	2019-06-27 12:46:35	37.64	21.12	51.2347	-12.1249	37.3512	Mozambique	1157.43	16.9765	190.601	0.413452	741.15	15.168	190.332	0.0557246	1164.8	8.68947	190.377	0.0875833	0.795667	3.41763	0.0253521	0	99.268	8.197	0				78.2431	57.9989	57.7465		57.997	43.81	44.1725	43.92	43.8127	0.35	0.7175	0.396	0.352706	0.00805032	2018	1	1075.36	1005.12	1068.22
NIA_EDS19_60B	NIA_EDS19_7	2019-06-27 12:47:19	35.51	21.06	45.6409	-12.1248	37.3513	Mozambique	1372.68	18.6399	207.339	0.428699	956.399	16.8314	207.07	0.0709716	1215.79	7.79936	167.53	0.0902263	0.822023	3.41763	0.0253521	0	99.268	8.197	0				78.2431	57.9989	57.7465		57.997	43.81	44.1725	43.92	43.8127	0.35	0.7175	0.396	0.352706	0.00805032	2018	1	1075.36	1005.12	1068.22
NIA_EDS19_60C	NIA_EDS19_7	2019-06-27 12:47:57	39.89	24.15	55.6029	-12.1249	37.3514	Mozambique	921.225	10.1439	92.3784	0.400626	504.947	8.3353	92.1097	0.0428986	1256.62	7.56136	145.888	0.106765	0.845727	3.41763	0.0253521	0	99.268	8.197	0				78.2431	57.9989	57.7465		57.997	43.81	44.1725	43.92	43.8127	0.35	0.7175	0.396	0.352706	0.00805032	2018	1	1075.36	1005.12	1068.22
NIA_EDS19_60D	NIA_EDS19_7	2019-06-27 12:48:35	35.51	20.78	45.8028	-12.1247	37.3513	Mozambique	977.788	11.8491	112.005	0.393349	561.51	10.0405	111.736	0.0356212	1232.83	8.03566	156.133	0.0782136	0.834034	3.41763	0.0253521	0	99.268	8.197	0				78.2431	57.9989	57.7465		57.997	43.81	44.1725	43.92	43.8127	0.35	0.7175	0.396	0.352706	0.00805032	2018	1	1075.36	1005.12	1068.22
NIA_EDS19_61A	NIA_EDS19_7	2019-06-27 12:50:54	34.45	19.38	43.9595	-12.1247	37.3512	Mozambique	851.91	10.1737	95.4181	0.39585	435.632	8.36516	95.1494	0.0381221	1207.25	8.45029	167.819	0.105653	0.820737	3.41763	0.0253521	0	99.268	8.197	0				78.2431	57.9989	57.7465		57.997	43.81	44.1725	43.92	43.8127	0.35	0.7175	0.396	0.352706	0.00805032	2018	1	1075.36	1005.12	1068.22
NIA_EDS19_61C	NIA_EDS19_7	2019-06-27 12:52:08	34.66	21.07	43.5421	-12.1247	37.3515	Mozambique	884.931	10.6593	78.3448	0.431884	468.653	8.85074	78.0761	0.0741569	1263.47	8.69786	133.964	0.199937	0.857194	3.41763	0.0253521	0	99.268	8.197	0				78.2431	57.9989	57.7465		57.997	43.81	44.1725	43.92	43.8127	0.35	0.7175	0.396	0.352706	0.00805032	2018	1	1075.36	1005.12	1068.22
NIA_EDS19_61D	NIA_EDS19_7	2019-06-27 12:52:46	36.43	23.3	46.6421	-12.1246	37.3514	Mozambique	1222.86	15.8276	155.071	0.412545	806.582	14.019	154.803	0.0548172	1242.49	7.87196	151.768	0.0844483	0.838979	3.41763	0.0253521	0	99.268	8.197	0				78.2431	57.9989	57.7465		57.997	43.81	44.1725	43.92	43.8127	0.35	0.7175	0.396	0.352706	0.00805032	2018	1	1075.36	1005.12	1068.22
NIA_EDS19_62B	NIA_EDS19_7	2019-06-27 12:55:41	38.1	24.14	50.5152	-12.1246	37.3512	Mozambique	833.967	10.8955	107.758	0.389307	417.689	9.08693	107.489	0.0315791	1159.41	9.19439	189.892	0.0876625	0.795328	3.41763	0.0253521	0	99.268	8.197	0				78.2431	57.9989	57.7465		57.997	43.81	44.1725	43.92	43.8127	0.35	0.7175	0.396	0.352706	0.00805032	2018	1	1075.36	1005.12	1068.22
NIA_EDS19_62C	NIA_EDS19_7	2019-06-27 12:56:19	34.13	20.14	42.7778	-12.1241	37.3509	Mozambique	698.048	8.20326	72.8861	0.37972	281.77	6.3947	72.6174	0.0219922	1155.54	9.55938	189.534	0.0901959	0.79509	3.41763	0.0253521	0	99.268	8.197	0				78.2431	57.9989	57.7465		57.997	43.81	44.1725	43.92	43.8127	0.35	0.7175	0.396	0.352706	0.00805032	2018	1	1075.36	1005.12	1068.22
NIA_EDS19_62D	NIA_EDS19_7	2019-06-27 12:56:58	33.18	20.95	40.157	-12.1242	37.3511	Mozambique	879.392	7.67866	63.418	0.463018	463.114	5.87009	63.1493	0.105291	1327.89	6.13534	115.239	0.301921	0.880004	3.41763	0.0253521	0	99.268	8.197	0				78.2431	57.9989	57.7465		57.997	43.81	44.1725	43.92	43.8127	0.35	0.7175	0.396	0.352706	0.00805032	2018	1	1075.36	1005.12	1068.22
NIA_EDS19_63A	NIA_EDS19_7	2019-06-27 12:59:05	33.99	20.5	42.2544	-12.1245	37.3512	Mozambique	697.169	7.57215	62.1829	0.3793	280.891	5.76359	61.9142	0.021572	1199.89	8.97463	168.325	0.0921559	0.81939	3.41763	0.0253521	0	99.268	8.197	0				78.2431	57.9989	57.7465		57.997	43.81	44.1725	43.92	43.8127	0.35	0.7175	0.396	0.352706	0.00805032	2018	1	1075.36	1005.12	1068.22
NIA_EDS19_63B	NIA_EDS19_7	2019-06-27 12:59:46	33.8	22.18	40.9259	-12.1245	37.3512	Mozambique	589.412	5.26359	42.7851	0.375385	173.135	3.45503	42.5164	0.0176576	1177.46	8.56512	184.024	0.120094	0.802846	3.41763	0.0253521	0	99.268	8.197	0				78.2431	57.9989	57.7465		57.997	43.81	44.1725	43.92	43.8127	0.35	0.7175	0.396	0.352706	0.00805032	2018	1	1075.36	1005.12	1068.22
NIA_EDS19_63C	NIA_EDS19_7	2019-06-27 13:00:23	31.44	20.95	36.4047	-12.1241	37.351	Mozambique	563.264	5.3429	37.2139	0.376371	146.986	3.53433	36.9452	0.0186435	1156.38	10.1357	184.987	0.146684	0.799136	3.41763	0.0253521	0	99.268	8.197	0				78.2431	57.9989	57.7465		57.997	43.81	44.1725	43.92	43.8127	0.35	0.7175	0.396	0.352706	0.00805032	2018	1	1075.36	1005.12	1068.22
NIA_EDS19_63D	NIA_EDS19_7	2019-06-27 13:01:02	31.42	22.43	35.6826	-12.1242	37.3512	Mozambique	592.649	4.8243	33.1881	0.512905	176.371	3.01573	32.9194	0.155177	1249.4	7.78733	148.417	1.09934	0.84271	3.41763	0.0253521	0	99.268	8.197	0				78.2431	57.9989	57.7465		57.997	43.81	44.1725	43.92	43.8127	0.35	0.7175	0.396	0.352706	0.00805032	2018	1	1075.36	1005.12	1068.22
NIA_EDS19_64B	NIA_EDS19_7	2019-06-27 13:04:02	32.83	23.35	38.1809	-12.1242	37.3517	Mozambique	733.967	5.91602	50.7321	0.38249	317.689	4.10746	50.4635	0.0247626	1299.72	6.1255	131.396	0.101315	0.862928	3.41763	0.0253521	0	99.268	8.197	0				78.2431	57.9989	57.7465		57.997	43.81	44.1725	43.92	43.8127	0.35	0.7175	0.396	0.352706	0.00805032	2018	1	1075.36	1005.12	1068.22
NIA_EDS19_64C	NIA_EDS19_7	2019-06-27 13:04:40	32.92	22.82	38.6396	-12.1241	37.352	Mozambique	701.967	5.95665	48.7026	0.377771	285.689	4.14808	48.4339	0.0200434	1279.96	6.77441	138.105	0.0898057	0.855042	3.41763	0.0253521	0	99.268	8.197	0				78.2431	57.9989	57.7465		57.997	43.81	44.1725	43.92	43.8127	0.35	0.7175	0.396	0.352706	0.00805032	2018	1	1075.36	1005.12	1068.22
NIA_EDS19_64D	NIA_EDS19_7	2019-06-27 13:05:17	33.2	22.36	39.4849	-12.1241	37.3516	Mozambique	778.995	7.81069	46.1485	0.480719	362.717	6.00213	45.8798	0.122991	1320.86	7.96739	106.333	0.447914	0.887714	3.41763	0.0253521	0	99.268	8.197	0				78.2431	57.9989	57.7465		57.997	43.81	44.1725	43.92	43.8127	0.35	0.7175	0.396	0.352706	0.00805032	2018	1	1075.36	1005.12	1068.22
NIA_EDS19_65A	NIA_EDS19_7	2019-06-27 13:07:44	34.55	21.69	42.9374	-12.1242	37.3516	Mozambique	423.92	1.82351	87.4475	0.40801	7.64262	0.014949	87.1788	0.0502824	117.012	0.0834301	849.487	0.7699	0.0806001	3.41763	0.0253521	0	99.268	8.197	0				78.2431	57.9989	57.7465		57.997	43.81	44.1725	43.92	43.8127	0.35	0.7175	0.396	0.352706	0.00805032	2018	1	1075.36	1005.12	1068.22
NIA_EDS19_65B	NIA_EDS19_7	2019-06-27 13:08:21	40.82	25.85	57.1114	-12.124	37.3518	Mozambique	1217.86	8.19036	87.2472	0.410909	801.58	6.38179	86.9785	0.0531811	1387.86	4.02775	95.8448	0.0920845	0.902113	3.41763	0.0253521	0	99.268	8.197	0				78.2431	57.9989	57.7465		57.997	43.81	44.1725	43.92	43.8127	0.35	0.7175	0.396	0.352706	0.00805032	2018	1	1075.36	1005.12	1068.22
NIA_EDS19_65C	NIA_EDS19_7	2019-06-27 13:09:01	43.46	25.38	66.0145	-12.124	37.3517	Mozambique	2093.89	14.097	211.031	0.466366	1677.62	12.2885	210.762	0.108639	1368.67	3.65448	109.435	0.0886385	0.88839	3.41763	0.0253521	0	99.268	8.197	0				78.2431	57.9989	57.7465		57.997	43.81	44.1725	43.92	43.8127	0.35	0.7175	0.396	0.352706	0.00805032	2018	1	1075.36	1005.12	1068.22
NIA_EDS19_66A	NIA_EDS19_7	2019-06-27 13:13:13	37.2	19.92	50.7862	-12.1238	37.3515	Mozambique	1320.7	17.8956	164.964	0.412864	904.422	16.087	164.695	0.0551365	1251.32	8.11324	145.023	0.0762898	0.845952	3.41763	0.0253521	0	99.268	8.197	0				78.2431	57.9989	57.7465		57.997	43.81	44.1725	43.92	43.8127	0.35	0.7175	0.396	0.352706	0.00805032	2018	1	1075.36	1005.12	1068.22
NIA_EDS19_66B	NIA_EDS19_7	2019-06-27 13:13:54	36.74	20.46	49.1953	-12.1238	37.3515	Mozambique	1090.75	13.6192	127.557	0.408598	674.473	11.8106	127.288	0.05087	1245.36	7.94924	149.581	0.0939342	0.841239	3.41763	0.0253521	0	99.268	8.197	0				78.2431	57.9989	57.7465		57.997	43.81	44.1725	43.92	43.8127	0.35	0.7175	0.396	0.352706	0.00805032	2018	1	1075.36	1005.12	1068.22
NIA_EDS19_66C	NIA_EDS19_7	2019-06-27 13:14:58	34.48	18.81	44.344	-12.1236	37.3513	Mozambique	962.623	8.66095	89.0877	0.399217	546.345	6.85238	88.819	0.0414898	1297.19	5.9306	134.215	0.0985162	0.860164	3.41763	0.0253521	0	99.268	8.197	0				78.2431	57.9989	57.7465		57.997	43.81	44.1725	43.92	43.8127	0.35	0.7175	0.396	0.352706	0.00805032	2018	1	1075.36	1005.12	1068.22
NIA_EDS19_66D	NIA_EDS19_7	2019-06-27 13:17:20	34.31	20.41	43.0618	-12.1237	37.3516	Mozambique	651.187	6.79244	47.8721	0.474521	234.909	4.98387	47.6034	0.116793	1215.02	9.39665	156.704	0.604134	0.8315	3.41763	0.0253521	0	99.268	8.197	0				78.2431	57.9989	57.7465		57.997	43.81	44.1725	43.92	43.8127	0.35	0.7175	0.396	0.352706	0.00805032	2018	1	1075.36	1005.12	1068.22
NIA_EDS19_67A	NIA_EDS19_7	2019-06-27 13:18:31	32.08	21.67	37.404	-12.1233	37.352	Mozambique	931.048	10.3502	95.3005	0.51859	514.77	8.5416	95.0318	0.160862	1253.84	7.58383	147.318	0.391843	0.84416	3.41763	0.0253521	0	99.268	8.197	0				78.2431	57.9989	57.7465		57.997	43.81	44.1725	43.92	43.8127	0.35	0.7175	0.396	0.352706	0.00805032	2018	1	1075.36	1005.12	1068.22
NIA_EDS19_67B	NIA_EDS19_7	2019-06-27 13:19:10	31.69	22.05	36.4105	-12.1233	37.352	Mozambique	837.49	7.71874	68.8326	0.389581	421.212	5.91017	68.5639	0.0318539	1289.96	6.59778	133.638	0.0975594	0.86001	3.41763	0.0253521	0	99.268	8.197	0				78.2431	57.9989	57.7465		57.997	43.81	44.1725	43.92	43.8127	0.35	0.7175	0.396	0.352706	0.00805032	2018	1	1075.36	1005.12	1068.22
NIA_EDS19_67C	NIA_EDS19_7	2019-06-27 13:19:57	31.87	22.81	36.4247	-12.1232	37.352	Mozambique	878.878	9.68755	90.1867	0.395625	462.6	7.87898	89.918	0.0378974	1241.37	7.70705	153.568	0.101704	0.837258	3.41763	0.0253521	0	99.268	8.197	0				78.2431	57.9989	57.7465		57.997	43.81	44.1725	43.92	43.8127	0.35	0.7175	0.396	0.352706	0.00805032	2018	1	1075.36	1005.12	1068.22
NIA_EDS19_67D	NIA_EDS19_7	2019-06-27 13:21:57	34.06	22.06	41.587	-12.1233	37.352	Mozambique	1211.19	7.88614	59.6663	0.381636	794.912	6.07757	59.3976	0.0239086	1436.38	4.00314	68.3087	0.043205	0.930473	3.41763	0.0253521	0	99.268	8.197	0				78.2431	57.9989	57.7465		57.997	43.81	44.1725	43.92	43.8127	0.35	0.7175	0.396	0.352706	0.00805032	2018	1	1075.36	1005.12	1068.22
NIA_EDS19_68A	NIA_EDS19_7	2019-06-27 13:22:35	32.76	24.41	37.5051	-12.1232	37.3521	Mozambique	1034.36	14.1518	141.489	0.402604	618.083	12.3432	141.22	0.0448766	1194.07	8.69231	173.636	0.0867031	0.814013	3.41763	0.0253521	0	99.268	8.197	0				78.2431	57.9989	57.7465		57.997	43.81	44.1725	43.92	43.8127	0.35	0.7175	0.396	0.352706	0.00805032	2018	1	1075.36	1005.12	1068.22
NIA_EDS19_68C	NIA_EDS19_7	2019-06-27 13:24:14	31.55	23.89	35.2701	-12.1232	37.3519	Mozambique	719.259	5.79366	56.6684	0.37975	302.981	3.98509	56.3997	0.0220229	1267.47	6.07687	150.16	0.0921353	0.843064	3.41763	0.0253521	0	99.268	8.197	0				78.2431	57.9989	57.7465		57.997	43.81	44.1725	43.92	43.8127	0.35	0.7175	0.396	0.352706	0.00805032	2018	1	1075.36	1005.12	1068.22
NIA_EDS19_68D	NIA_EDS19_7	2019-06-27 13:24:49	30.87	23.65	34.0399	-12.1231	37.3518	Mozambique	617.628	4.83117	38.855	0.46763	201.35	3.0226	38.5863	0.109903	1253.14	6.85723	152.84	0.684045	0.839181	3.41763	0.0253521	0	99.268	8.197	0				78.2431	57.9989	57.7465		57.997	43.81	44.1725	43.92	43.8127	0.35	0.7175	0.396	0.352706	0.00805032	2018	1	1075.36	1005.12	1068.22
NIA_EDS19_69A	NIA_EDS19_7	2019-06-27 13:27:21	31.58	23.29	35.6087	-12.1234	37.3518	Mozambique	592.648	4.25485	37.8072	0.479909	176.37	2.44628	37.5385	0.122182	1235.31	6.24568	167.335	0.85583	0.824511	3.41763	0.0253521	0	99.268	8.197	0				78.2431	57.9989	57.7465		57.997	43.81	44.1725	43.92	43.8127	0.35	0.7175	0.396	0.352706	0.00805032	2018	1	1075.36	1005.12	1068.22
NIA_EDS19_69C	NIA_EDS19_7	2019-06-27 13:28:48	35.41	28.58	41.0662	-12.1234	37.352	Mozambique	1598.66	15.7718	178.375	0.488795	1182.39	13.9632	178.106	0.131067	1314.83	5.65999	126.051	0.145758	0.869087	3.41763	0.0253521	0	99.268	8.197	0				78.2431	57.9989	57.7465		57.997	43.81	44.1725	43.92	43.8127	0.35	0.7175	0.396	0.352706	0.00805032	2018	1	1075.36	1005.12	1068.22
NIA_EDS19_70A	NIA_EDS19_7	2019-06-27 13:32:07	36.08	19.9	47.785	-12.1231	37.3519	Mozambique	940.985	10.9494	110.434	0.395227	524.707	9.14081	110.165	0.0374998	1223.3	7.76819	163.462	0.0874325	0.826476	3.41763	0.0253521	0	99.268	8.197	0				78.2431	57.9989	57.7465		57.997	43.81	44.1725	43.92	43.8127	0.35	0.7175	0.396	0.352706	0.00805032	2018	1	1075.36	1005.12	1068.22
NIA_EDS19_70B	NIA_EDS19_7	2019-06-27 13:32:45	36.41	22.33	47.1804	-12.1232	37.3521	Mozambique	1075.19	11.4565	114.555	0.409369	658.908	9.64798	114.287	0.0516411	1274.97	6.80504	140.743	0.0999307	0.852189	3.41763	0.0253521	0	99.268	8.197	0				78.2431	57.9989	57.7465		57.997	43.81	44.1725	43.92	43.8127	0.35	0.7175	0.396	0.352706	0.00805032	2018	1	1075.36	1005.12	1068.22
NIA_EDS19_70D	NIA_EDS19_7	2019-06-27 13:34:07	33.59	20.69	41.2236	-12.123	37.3519	Mozambique	831.282	9.68774	84.8986	0.492479	415.004	7.87917	84.6299	0.134752	1223	8.46397	158.728	0.397133	0.830616	3.41763	0.0253521	0	99.268	8.197	0				78.2431	57.9989	57.7465		57.997	43.81	44.1725	43.92	43.8127	0.35	0.7175	0.396	0.352706	0.00805032	2018	1	1075.36	1005.12	1068.22
NIA_EDS19_71A	NIA_EDS19_7	2019-06-27 13:36:22	32.35	20.27	38.6569	-12.123	37.3519	Mozambique	1195.77	16.0385	180.524	0.409823	779.495	14.2299	180.256	0.0520958	1198.21	7.97334	176.345	0.0800849	0.812185	3.41763	0.0253521	0	99.268	8.197	0				78.2431	57.9989	57.7465		57.997	43.81	44.1725	43.92	43.8127	0.35	0.7175	0.396	0.352706	0.00805032	2018	1	1075.36	1005.12	1068.22
NIA_EDS19_71B	NIA_EDS19_7	2019-06-27 13:36:59	34.85	24.48	42.1015	-12.123	37.3519	Mozambique	1275.85	17.6894	203.201	0.416624	859.572	15.8808	202.933	0.0588964	1192.53	8.03119	179.182	0.0817154	0.809005	3.41763	0.0253521	0	99.268	8.197	0				78.2431	57.9989	57.7465		57.997	43.81	44.1725	43.92	43.8127	0.35	0.7175	0.396	0.352706	0.00805032	2018	1	1075.36	1005.12	1068.22
NIA_EDS19_71C	NIA_EDS19_7	2019-06-27 13:37:38	35.49	23.91	43.9447	-12.123	37.3519	Mozambique	1077.4	14.0471	145.788	0.410807	661.12	12.2385	145.519	0.0530798	1208.36	8.15387	169.275	0.0970229	0.819598	3.41763	0.0253521	0	99.268	8.197	0				78.2431	57.9989	57.7465		57.997	43.81	44.1725	43.92	43.8127	0.35	0.7175	0.396	0.352706	0.00805032	2018	1	1075.36	1005.12	1068.22
NIA_EDS19_71D	NIA_EDS19_7	2019-06-27 13:38:17	35.3	23.47	43.7384	-12.123	37.3519	Mozambique	911.555	8.41491	85.8388	0.393113	495.277	6.60634	85.5701	0.0353854	1281.7	6.23191	140.935	0.0915785	0.852681	3.41763	0.0253521	0	99.268	8.197	0				78.2431	57.9989	57.7465		57.997	43.81	44.1725	43.92	43.8127	0.35	0.7175	0.396	0.352706	0.00805032	2018	1	1075.36	1005.12	1068.22
NIA_EDS19_72B	NIA_EDS19_7	2019-06-27 13:41:51	33.8	24.14	39.8951	-12.1229	37.352	Mozambique	992.241	9.3546	93.2335	0.39776	575.963	7.54603	92.9648	0.0400323	1295.91	6.18899	133.124	0.0900784	0.861024	3.41763	0.0253521	0	99.268	8.197	0				78.2431	57.9989	57.7465		57.997	43.81	44.1725	43.92	43.8127	0.35	0.7175	0.396	0.352706	0.00805032	2018	1	1075.36	1005.12	1068.22
NIA_EDS19_72C	NIA_EDS19_7	2019-06-27 13:42:28	33.96	24.68	39.9659	-12.1229	37.352	Mozambique	983.416	8.50822	91.1057	0.40289	567.138	6.69966	90.837	0.045162	1303.47	5.61286	132.871	0.103804	0.861945	3.41763	0.0253521	0	99.268	8.197	0				78.2431	57.9989	57.7465		57.997	43.81	44.1725	43.92	43.8127	0.35	0.7175	0.396	0.352706	0.00805032	2018	1	1075.36	1005.12	1068.22
NIA_EDS19_72D	NIA_EDS19_7	2019-06-27 13:43:05	33.18	24.49	38.3587	-12.1228	37.352	Mozambique	1576.53	12.1194	121.409	0.497434	1160.26	10.3108	121.14	0.139707	1388.35	4.49737	92.2552	0.167183	0.905462	3.41763	0.0253521	0	99.268	8.197	0				78.2431	57.9989	57.7465		57.997	43.81	44.1725	43.92	43.8127	0.35	0.7175	0.396	0.352706	0.00805032	2018	1	1075.36	1005.12	1068.22
NIA_EDS19_73A	NIA_EDS19_7	2019-06-27 13:45:21	34.31	21.62	42.4072	-12.1228	37.352	Mozambique	1033.12	11.6818	116.429	0.402228	616.837	9.87327	116.161	0.0445003	1252.38	7.30715	150.101	0.0903565	0.841527	3.41763	0.0253521	0	99.268	8.197	0				78.2431	57.9989	57.7465		57.997	43.81	44.1725	43.92	43.8127	0.35	0.7175	0.396	0.352706	0.00805032	2018	1	1075.36	1005.12	1068.22
NIA_EDS19_73B	NIA_EDS19_7	2019-06-27 13:46:02	38.05	24.01	50.4653	-12.1227	37.3522	Mozambique	1459.62	11.967	163.436	0.445161	1043.34	10.1584	163.167	0.0874339	1317.97	4.67762	131.181	0.110456	0.864761	3.41763	0.0253521	0	99.268	8.197	0				78.2431	57.9989	57.7465		57.997	43.81	44.1725	43.92	43.8127	0.35	0.7175	0.396	0.352706	0.00805032	2018	1	1075.36	1005.12	1068.22
NIA_EDS19_73C	NIA_EDS19_7	2019-06-27 13:46:52	46.58	23.42	79.5369	-12.1227	37.3522	Mozambique	1552.03	12.895	157.149	0.441801	1135.76	11.0865	156.88	0.0840739	1340.24	4.7688	117.821	0.0992171	0.878635	3.41763	0.0253521	0	99.268	8.197	0				78.2431	57.9989	57.7465		57.997	43.81	44.1725	43.92	43.8127	0.35	0.7175	0.396	0.352706	0.00805032	2018	1	1075.36	1005.12	1068.22
NIA_EDS19_73D	NIA_EDS19_7	2019-06-27 13:47:30	43.64	20.65	70.8586	-12.1227	37.3522	Mozambique	782.588	3.41458	154.718	0.441067	366.31	1.60601	154.449	0.08334	1077.76	1.72243	289.211	0.24522	0.703415	3.41763	0.0253521	0	99.268	8.197	0				78.2431	57.9989	57.7465		57.997	43.81	44.1725	43.92	43.8127	0.35	0.7175	0.396	0.352706	0.00805032	2018	1	1075.36	1005.12	1068.22
NIA_EDS19_74A	NIA_EDS19_7	2019-06-27 13:49:26	38.14	17.5	55.0557	-12.1228	37.3521	Mozambique	882.985	7.16368	65.499	0.402578	466.708	5.35511	65.2303	0.0448506	1329.65	5.56138	118.277	0.127788	0.877372	3.41763	0.0253521	0	99.268	8.197	0				78.2431	57.9989	57.7465		57.997	43.81	44.1725	43.92	43.8127	0.35	0.7175	0.396	0.352706	0.00805032	2018	1	1075.36	1005.12	1068.22
NIA_EDS19_74B	NIA_EDS19_7	2019-06-27 13:50:04	46.02	22.9	77.8245	-12.1227	37.3521	Mozambique	1143.59	14.6732	158.457	0.422481	727.313	12.8646	158.188	0.0647539	1214.41	7.82996	168.103	0.108128	0.821358	3.41763	0.0253521	0	99.268	8.197	0				78.2431	57.9989	57.7465		57.997	43.81	44.1725	43.92	43.8127	0.35	0.7175	0.396	0.352706	0.00805032	2018	1	1075.36	1005.12	1068.22
NIA_EDS19_74C	NIA_EDS19_7	2019-06-27 13:50:41	42.15	18	52.0547	-12.1226	37.3521	Mozambique	1633.78	20.8168	218.421	0.433237	1217.5	19.0082	218.152	0.0755094	1264.17	7.19447	144.163	0.0784093	0.848046	3.41763	0.0253521	0	99.268	8.197	0				78.2431	57.9989	57.7465		57.997	43.81	44.1725	43.92	43.8127	0.35	0.7175	0.396	0.352706	0.00805032	2018	1	1075.36	1005.12	1068.22
NIA_EDS19_cal8	NIA_EDS19_7	calibration						Mozambique	4616.51	14.8074	97.5098	1.11959	4199.67	12.9996	97.3317	0.766498	1585.86	1.78937	23.3917	0.289461	0.977349
NIA_EDS19_cal9	NIA_EDS19_8	calibration						Mozambique	4768.69	15.1755	99.6557	1.11959	4290.15	13.3535	99.5051		1691.94	1.91967	24.9754		0.977332
NIA_EDS19_75A	NIA_EDS19_8	2019-07-01 10:48:03	35.96	43.5	33.4849	-12.2968	37.8192	Mozambique	863.84	2.50962	22.3078	0.34999	385.302	0.68762	22.1572		1641.72	1.06799	60.0857		0.945621	2.77416	3.46863	0.537456	42.8685	7.77493	340	6.59	12.17	2.23	55.4559	16.767	9.55322	11.4473	12.7935	43.14	41.69	30.74	41.4153	0.36	0.85	0.34	0.609089	0.0147069	2017	2	952.945	831.982	1160.29
NIA_EDS19_75B	NIA_EDS19_8	2019-07-01 10:48:42	33.66	41.49	30.5313	-12.2968	37.8191	Mozambique	1166.49	3.36712	42.9741	0.444726	687.948	1.54512	42.8235		1630.62	1.33499	64.6004		0.9414	2.77416	3.46863	0.537456	42.8685	7.77493	340	6.59	12.17	2.23	55.4559	16.767	9.55322	11.4473	12.7935	43.14	41.69	30.74	41.4153	0.36	0.85	0.34	0.609089	0.0147069	2017	2	952.945	831.982	1160.29
NIA_EDS19_75C	NIA_EDS19_8	2019-07-01 10:49:43	35.37	39.73	34.5787	-12.2968	37.8191	Mozambique	829.777	2.07831	15.4951	0.34999	351.239	0.256314	15.3445	0.0111412	1442.59	0.383736	40.1097	0.0457618	0.958142	2.77416	3.46863	0.537456	42.8685	7.77493	340	6.59	12.17	2.23	55.4559	16.767	9.55322	11.4473	12.7935	43.14	41.69	30.74	41.4153	0.36	0.85	0.34	0.609089	0.0147069	2017	2	952.945	831.982	1160.29
NIA_EDS19_75D	NIA_EDS19_8	2019-07-01 10:50:50	34.66	36.73	34.9032	-12.2964	37.819	Mozambique	1028.57	2.98598	28.9608	0.444726	550.032	1.16398	28.8102	0.105877	1421.07	1.09622	47.3731	0.273566	0.950228	2.77416	3.46863	0.537456	42.8685	7.77493	340	6.59	12.17	2.23	55.4559	16.767	9.55322	11.4473	12.7935	43.14	41.69	30.74	41.4153	0.36	0.85	0.34	0.609089	0.0147069	2017	2	952.945	831.982	1160.29
NIA_EDS19_76A	NIA_EDS19_8	2019-07-01 10:54:40	36.63	35.76	39.4944	-12.2964	37.819	Mozambique	628.201	2.21848	10.0219	0.352696	149.663	0.396485	9.87127	0.0138467	1398.13	1.35014	58.6897	0.129363	0.938124	2.77416	3.46863	0.537456	42.8685	7.77493	340	6.59	12.17	2.23	55.4559	16.767	9.55322	11.4473	12.7935	43.14	41.69	30.74	41.4153	0.36	0.85	0.34	0.609089	0.0147069	2017	2	952.945	831.982	1160.29
NIA_EDS19_76C	NIA_EDS19_8	2019-07-01 10:56:06	36.1	33.52	39.7033	-12.2961	37.8189	Mozambique	521.802	1.92675	2.68134	0.345037	43.2632	0.104753	2.53071	0.00618756	1410.26	1.24471	52.5024	0.201711	0.944737	2.77416	3.46863	0.537456	42.8685	7.77493	340	6.59	12.17	2.23	55.4559	16.767	9.55322	11.4473	12.7935	43.14	41.69	30.74	41.4153	0.36	0.85	0.34	0.609089	0.0147069	2017	2	952.945	831.982	1160.29
NIA_EDS19_76D	NIA_EDS19_8	2019-07-01 10:57:07	35.41	32.59	38.7605	-12.2958	37.8189	Mozambique	783.807	2.22978	13.2583	0.359237	305.269	0.407781	13.1076	0.0203882	1440	0.701175	39.3515	0.0961807	0.95883	2.77416	3.46863	0.537456	42.8685	7.77493	340	6.59	12.17	2.23	55.4559	16.767	9.55322	11.4473	12.7935	43.14	41.69	30.74	41.4153	0.36	0.85	0.34	0.609089	0.0147069	2017	2	952.945	831.982	1160.29
NIA_EDS19_77A	NIA_EDS19_8	2019-07-01 11:00:51	37.42	31.54	43.939	-12.2956	37.8188	Mozambique	1052.58	4.01274	44.6817	0.375584	574.037	2.19074	44.5311	0.0367345	1375.07	1.91292	67.8899	0.0880011	0.928009	2.77416	3.46863	0.537456	42.8685	7.77493	340	6.59	12.17	2.23	55.4559	16.767	9.55322	11.4473	12.7935	43.14	41.69	30.74	41.4153	0.36	0.85	0.34	0.609089	0.0147069	2017	2	952.945	831.982	1160.29
NIA_EDS19_77B	NIA_EDS19_8	2019-07-01 11:01:31	38.56	30.53	47.4224	-12.2956	37.8188	Mozambique	1182.82	4.4118	50.8131	0.389874	704.278	2.5898	50.6625	0.0510252	1383.73	1.85479	63.3508	0.100259	0.932892	2.77416	3.46863	0.537456	42.8685	7.77493	340	6.59	12.17	2.23	55.4559	16.767	9.55322	11.4473	12.7935	43.14	41.69	30.74	41.4153	0.36	0.85	0.34	0.609089	0.0147069	2017	2	952.945	831.982	1160.29
NIA_EDS19_77C	NIA_EDS19_8	2019-07-01 11:02:09	40.24	29.8	52.4295	-12.2956	37.8188	Mozambique	1291.88	4.80679	55.1757	0.403186	813.341	2.98479	55.0251	0.0643365	1389.82	1.85918	59.8419	0.109945	0.936634	2.77416	3.46863	0.537456	42.8685	7.77493	340	6.59	12.17	2.23	55.4559	16.767	9.55322	11.4473	12.7935	43.14	41.69	30.74	41.4153	0.36	0.85	0.34	0.609089	0.0147069	2017	2	952.945	831.982	1160.29
NIA_EDS19_77D	NIA_EDS19_8	2019-07-01 11:02:49	41.36	29.29	56.0394	-12.2956	37.8188	Mozambique	796.351	3.44673	23.5469	0.361965	317.813	1.62473	23.3963	0.0231157	1373.3	2.55916	64.3426	0.0998921	0.931431	2.77416	3.46863	0.537456	42.8685	7.77493	340	6.59	12.17	2.23	55.4559	16.767	9.55322	11.4473	12.7935	43.14	41.69	30.74	41.4153	0.36	0.85	0.34	0.609089	0.0147069	2017	2	952.945	831.982	1160.29
NIA_EDS19_78A	NIA_EDS19_8	2019-07-01 11:05:26	40.7	27.61	55.4023	-12.2955	37.8188	Mozambique	1096.38	3.29678	31.0322	0.380663	617.842	1.47478	30.8816	0.0418137	1423.01	1.23817	45.2675	0.0963115	0.952396	2.77416	3.46863	0.537456	42.8685	7.77493	340	6.59	12.17	2.23	55.4559	16.767	9.55322	11.4473	12.7935	43.14	41.69	30.74	41.4153	0.36	0.85	0.34	0.609089	0.0147069	2017	2	952.945	831.982	1160.29
NIA_EDS19_78B	NIA_EDS19_8	2019-07-01 11:06:09	53.03	29.98	100.221	-12.2955	37.8188	Mozambique	2330.84	4.16447	68.6609	0.462866	1852.3	2.34248	68.5103	0.124017	1449.56	0.668221	34.1222	0.0970588	0.964333	2.77416	3.46863	0.537456	42.8685	7.77493	340	6.59	12.17	2.23	55.4559	16.767	9.55322	11.4473	12.7935	43.14	41.69	30.74	41.4153	0.36	0.85	0.34	0.609089	0.0147069	2017	2	952.945	831.982	1160.29
NIA_EDS19_78C	NIA_EDS19_8	2019-07-01 11:06:51	57.86	28.43	129.056	-12.2955	37.8189	Mozambique	2594.76	6.01232	116.946	0.48706	2116.22	4.19032	116.795	0.148211	1417.73	1.02329	49.7983	0.0992984	0.947696	2.77416	3.46863	0.537456	42.8685	7.77493	340	6.59	12.17	2.23	55.4559	16.767	9.55322	11.4473	12.7935	43.14	41.69	30.74	41.4153	0.36	0.85	0.34	0.609089	0.0147069	2017	2	952.945	831.982	1160.29
NIA_EDS19_79A	NIA_EDS19_8	2019-07-01 11:11:00	44.12	20.09	73.1563	-12.2946	37.8192	Mozambique	781.714	3.62725	29.9166	0.369052	303.176	1.80525	29.766	0.0302029	1335.64	2.89903	83.4586	0.133067	0.910597	2.77416	3.46863	0.537456	42.8685	7.77493	340	6.59	12.17	2.23	55.4559	16.767	9.55322	11.4473	12.7935	43.14	41.69	30.74	41.4153	0.36	0.85	0.34	0.609089	0.0147069	2017	2	952.945	831.982	1160.29
NIA_EDS19_79B	NIA_EDS19_8	2019-07-01 11:11:38	47.99	22.81	86.0994	-12.2944	37.8193	Mozambique	2149.27	9.00169	0.26791	0.342901	1670.74	7.17969	0.117275	0.00405199	1488.65	2.33191	0.0665039	0.00361062	0.99993	2.77416	3.46863	0.537456	42.8685	7.77493	340	6.59	12.17	2.23	55.4559	16.767	9.55322	11.4473	12.7935	43.14	41.69	30.74	41.4153	0.36	0.85	0.34	0.609089	0.0147069	2017	2	952.945	831.982	1160.29
NIA_EDS19_79C	NIA_EDS19_8	2019-07-01 11:12:15	52.97	22.45	110.675	-12.2942	37.8193	Mozambique	1847.97	6.59453	72.2783	0.395188	1369.43	4.77254	72.1277	0.0563386	1412.5	1.7944	47.3486	0.0581145	0.949965	2.77416	3.46863	0.537456	42.8685	7.77493	340	6.59	12.17	2.23	55.4559	16.767	9.55322	11.4473	12.7935	43.14	41.69	30.74	41.4153	0.36	0.85	0.34	0.609089	0.0147069	2017	2	952.945	831.982	1160.29
NIA_EDS19_79D	NIA_EDS19_8	2019-07-01 11:12:59	50.13	21.19	97.8288	-12.2943	37.8194	Mozambique	1151.73	2.87608	29.7653	0.378142	673.192	1.05408	29.6147	0.0392932	1436.98	0.82018	40.2326	0.0838805	0.957862	2.77416	3.46863	0.537456	42.8685	7.77493	340	6.59	12.17	2.23	55.4559	16.767	9.55322	11.4473	12.7935	43.14	41.69	30.74	41.4153	0.36	0.85	0.34	0.609089	0.0147069	2017	2	952.945	831.982	1160.29
NIA_EDS19_80A	NIA_EDS19_8	2019-07-01 11:17:37	47	21.13	83.6811	-12.2944	37.8196	Mozambique	2036.36	3.89246	57.3803	0.427196	1557.82	2.07046	57.2297	0.0883472	1449.54	0.702265	33.8915	0.082212	0.964565	2.77416	3.46863	0.537456	42.8685	7.77493	340	6.59	12.17	2.23	55.4559	16.767	9.55322	11.4473	12.7935	43.14	41.69	30.74	41.4153	0.36	0.85	0.34	0.609089	0.0147069	2017	2	952.945	831.982	1160.29
NIA_EDS19_80B	NIA_EDS19_8	2019-07-01 11:18:14	49.71	23.44	93.0736	-12.2944	37.8196	Mozambique	827.583	2.75179	24.6024	0.364334	349.044	0.929794	24.4518	0.0254847	1392.19	1.35184	62.0703	0.101654	0.934533	2.77416	3.46863	0.537456	42.8685	7.77493	340	6.59	12.17	2.23	55.4559	16.767	9.55322	11.4473	12.7935	43.14	41.69	30.74	41.4153	0.36	0.85	0.34	0.609089	0.0147069	2017	2	952.945	831.982	1160.29
NIA_EDS19_80C	NIA_EDS19_8	2019-07-01 11:18:52	43.88	21.07	71.3665	-12.2944	37.8196	Mozambique	2023.3	4.07922	60.004	0.415367	1544.76	2.25722	59.8534	0.0765183	1445.63	0.770002	35.6486	0.071613	0.962699	2.77416	3.46863	0.537456	42.8685	7.77493	340	6.59	12.17	2.23	55.4559	16.767	9.55322	11.4473	12.7935	43.14	41.69	30.74	41.4153	0.36	0.85	0.34	0.609089	0.0147069	2017	2	952.945	831.982	1160.29
NIA_EDS19_80D	NIA_EDS19_8	2019-07-01 11:19:47	45.23	20.3	77.2601	-12.2945	37.8196	Mozambique	1554.55	3.30264	42.5162	0.410987	1076.01	1.48064	42.3656	0.0721383	1445.2	0.724908	36.2144	0.0968963	0.962119	2.77416	3.46863	0.537456	42.8685	7.77493	340	6.59	12.17	2.23	55.4559	16.767	9.55322	11.4473	12.7935	43.14	41.69	30.74	41.4153	0.36	0.85	0.34	0.609089	0.0147069	2017	2	952.945	831.982	1160.29
NIA_EDS19_81A	NIA_EDS19_8	2019-07-01 11:22:36	44.01	19.73	73.0686	-12.2942	37.8195	Mozambique	629.527	2.20326	9.59242	0.356673	150.989	0.381262	9.44179	0.0178242	1403.78	1.29211	55.8685	0.165728	0.941147	2.77416	3.46863	0.537456	42.8685	7.77493	340	6.59	12.17	2.23	55.4559	16.767	9.55322	11.4473	12.7935	43.14	41.69	30.74	41.4153	0.36	0.85	0.34	0.609089	0.0147069	2017	2	952.945	831.982	1160.29
NIA_EDS19_81B	NIA_EDS19_8	2019-07-01 11:24:00	38.85	19.23	56.003	-12.2938	37.8194	Mozambique	651.908	2.3125	14.3778	0.354158	173.369	0.490507	14.2272	0.0153089	1374.37	1.41742	71.7809	0.121369	0.924161	2.77416	3.46863	0.537456	42.8685	7.77493	340	6.59	12.17	2.23	55.4559	16.767	9.55322	11.4473	12.7935	43.14	41.69	30.74	41.4153	0.36	0.85	0.34	0.609089	0.0147069	2017	2	952.945	831.982	1160.29
NIA_EDS19_81C	NIA_EDS19_8	2019-07-01 11:25:04	38.02	19.76	53.2014	-12.2943	37.8196	Mozambique	1498.15	3.20039	41.1343	0.417353	1019.62	1.37839	40.9837	0.0785041	1444.09	0.711621	36.9423	0.111193	0.961358	2.77416	3.46863	0.537456	42.8685	7.77493	340	6.59	12.17	2.23	55.4559	16.767	9.55322	11.4473	12.7935	43.14	41.69	30.74	41.4153	0.36	0.85	0.34	0.609089	0.0147069	2017	2	952.945	831.982	1160.29
NIA_EDS19_81D	NIA_EDS19_8	2019-07-01 11:25:42	49.56	23.7	92.0675	-12.2943	37.82	Mozambique	1991.66	3.5736	30.9564	0.398461	1513.12	1.7516	30.8058	0.0596121	1476.37	0.622984	19.1298	0.0581681	0.980047	2.77416	3.46863	0.537456	42.8685	7.77493	340	6.59	12.17	2.23	55.4559	16.767	9.55322	11.4473	12.7935	43.14	41.69	30.74	41.4153	0.36	0.85	0.34	0.609089	0.0147069	2017	2	952.945	831.982	1160.29
NIA_EDS19_82B	NIA_EDS19_8	2019-07-01 11:29:17	38.51	18.67	55.369	-12.2944	37.8196	Mozambique	532.723	2.2328	7.63805	0.342795	54.1843	0.410805	7.48742	0.00394569	1277.29	3.52999	112.333	0.0930187	0.878592	2.77416	3.46863	0.537456	42.8685	7.77493	340	6.59	12.17	2.23	55.4559	16.767	9.55322	11.4473	12.7935	43.14	41.69	30.74	41.4153	0.36	0.85	0.34	0.609089	0.0147069	2017	2	952.945	831.982	1160.29
NIA_EDS19_82C	NIA_EDS19_8	2019-07-01 11:29:57	38.71	19.12	55.6587	-12.2944	37.8197	Mozambique	602.234	2.55663	11.7715	0.346856	123.696	0.734638	11.6209	0.00800666	1341.29	2.90377	80.1979	0.0868257	0.914121	2.77416	3.46863	0.537456	42.8685	7.77493	340	6.59	12.17	2.23	55.4559	16.767	9.55322	11.4473	12.7935	43.14	41.69	30.74	41.4153	0.36	0.85	0.34	0.609089	0.0147069	2017	2	952.945	831.982	1160.29
NIA_EDS19_83A	NIA_EDS19_8	2019-07-01 11:33:47	48.05	23.3	85.8116	-12.2945	37.8201	Mozambique	1168.42	3.81236	47.8713	0.393869	689.881	1.99036	47.7206	0.0550196	1392.17	1.4641	61.2887	0.111036	0.935303	2.77416	3.46863	0.537456	42.8685	7.77493	340	6.59	12.17	2.23	55.4559	16.767	9.55322	11.4473	12.7935	43.14	41.69	30.74	41.4153	0.36	0.85	0.34	0.609089	0.0147069	2017	2	952.945	831.982	1160.29
NIA_EDS19_83B	NIA_EDS19_8	2019-07-01 11:34:58	38.02	21.39	52.1206	-12.2945	37.8199	Mozambique	580.968	2.53013	14.647	0.346921	102.43	0.708138	14.4964	0.0080719	1276.52	3.21693	114.979	0.100602	0.876021	2.77416	3.46863	0.537456	42.8685	7.77493	340	6.59	12.17	2.23	55.4559	16.767	9.55322	11.4473	12.7935	43.14	41.69	30.74	41.4153	0.36	0.85	0.34	0.609089	0.0147069	2017	2	952.945	831.982	1160.29
NIA_EDS19_83C	NIA_EDS19_8	2019-07-01 11:35:37	37.61	22.02	50.5678	-12.2944	37.8199	Mozambique	768.893	2.74535	11.3657	0.347902	290.355	0.923354	11.2151	0.00905312	1435.24	1.66374	35.2821	0.0447531	0.962811	2.77416	3.46863	0.537456	42.8685	7.77493	340	6.59	12.17	2.23	55.4559	16.767	9.55322	11.4473	12.7935	43.14	41.69	30.74	41.4153	0.36	0.85	0.34	0.609089	0.0147069	2017	2	952.945	831.982	1160.29
NIA_EDS19_83D	NIA_EDS19_8	2019-07-01 11:36:48	36.12	23.09	45.9827	-12.294	37.8199	Mozambique	699.839	2.96059	25.1388	0.35287	221.3	1.1386	24.9882	0.0140209	1320.78	2.47709	94.9166	0.0836867	0.898541	2.77416	3.46863	0.537456	42.8685	7.77493	340	6.59	12.17	2.23	55.4559	16.767	9.55322	11.4473	12.7935	43.14	41.69	30.74	41.4153	0.36	0.85	0.34	0.609089	0.0147069	2017	2	952.945	831.982	1160.29
NIA_EDS19_84A	NIA_EDS19_8	2019-07-01 11:39:07	39.2	24.93	53.0378	-12.2941	37.8199	Mozambique	1937.07	4.03573	63.0187	0.435033	1458.53	2.21374	62.8681	0.0961839	1438.63	0.795938	39.4657	0.0948777	0.958677	2.77416	3.46863	0.537456	42.8685	7.77493	340	6.59	12.17	2.23	55.4559	16.767	9.55322	11.4473	12.7935	43.14	41.69	30.74	41.4153	0.36	0.85	0.34	0.609089	0.0147069	2017	2	952.945	831.982	1160.29
NIA_EDS19_84B	NIA_EDS19_8	2019-07-01 11:39:47	46.66	26.4	76.7534	-12.2941	37.8201	Mozambique	1350.56	4.01853	55.2236	0.404263	872.017	2.19654	55.073	0.0654135	1402.92	1.28815	56.3901	0.105246	0.940596	2.77416	3.46863	0.537456	42.8685	7.77493	340	6.59	12.17	2.23	55.4559	16.767	9.55322	11.4473	12.7935	43.14	41.69	30.74	41.4153	0.36	0.85	0.34	0.609089	0.0147069	2017	2	952.945	831.982	1160.29
NIA_EDS19_84C	NIA_EDS19_8	2019-07-01 11:40:26	42.83	24.34	64.773	-12.2941	37.82	Mozambique	1035.75	3.48047	38.6551	0.380421	557.207	1.65848	38.5045	0.0415716	1391.74	1.50998	61.2084	0.103841	0.935364	2.77416	3.46863	0.537456	42.8685	7.77493	340	6.59	12.17	2.23	55.4559	16.767	9.55322	11.4473	12.7935	43.14	41.69	30.74	41.4153	0.36	0.85	0.34	0.609089	0.0147069	2017	2	952.945	831.982	1160.29
NIA_EDS19_84D	NIA_EDS19_8	2019-07-01 11:41:13	42.93	23.05	66.2222	-12.2941	37.8199	Mozambique	778.403	3.68357	39.4052	0.360764	299.865	1.86157	39.2546	0.0219152	1292.84	2.92564	107.713	0.0944922	0.884245	2.77416	3.46863	0.537456	42.8685	7.77493	340	6.59	12.17	2.23	55.4559	16.767	9.55322	11.4473	12.7935	43.14	41.69	30.74	41.4153	0.36	0.85	0.34	0.609089	0.0147069	2017	2	952.945	831.982	1160.29
NIA_EDS19_85A	NIA_EDS19_8	2019-07-01 11:43:35	39.97	22.8	56.8344	-12.2941	37.8197	Mozambique	689.715	5.04156	37.7182	0.350796	211.176	3.21956	37.5676	0.0119466	1197.9	6.65723	135.627	0.0677719	0.848971	2.77416	3.46863	0.537456	42.8685	7.77493	340	6.59	12.17	2.23	55.4559	16.767	9.55322	11.4473	12.7935	43.14	41.69	30.74	41.4153	0.36	0.85	0.34	0.609089	0.0147069	2017	2	952.945	831.982	1160.29
NIA_EDS19_85D	NIA_EDS19_8	2019-07-01 11:45:31	39.75	22.69	56.2513	-12.2939	37.8197	Mozambique	672.347	2.8434	18.8792	0.427077	193.809	1.0214	18.7286	0.0882275	1341.31	2.57676	82.4929	0.610645	0.911881	2.77416	3.46863	0.537456	42.8685	7.77493	340	6.59	12.17	2.23	55.4559	16.767	9.55322	11.4473	12.7935	43.14	41.69	30.74	41.4153	0.36	0.85	0.34	0.609089	0.0147069	2017	2	952.945	831.982	1160.29
NIA_EDS19_86A	NIA_EDS19_8	2019-07-01 11:49:07	40.57	22.59	58.8371	-12.2939	37.8199	Mozambique	1412.4	5.83168	68.8011	0.480301	933.866	4.00968	68.6505	0.141452	1378.04	2.15679	64.4731	0.208745	0.931522	2.77416	3.46863	0.537456	42.8685	7.77493	340	6.59	12.17	2.23	55.4559	16.767	9.55322	11.4473	12.7935	43.14	41.69	30.74	41.4153	0.36	0.85	0.34	0.609089	0.0147069	2017	2	952.945	831.982	1160.29
NIA_EDS19_86B	NIA_EDS19_8	2019-07-01 11:49:45	41.08	23.44	59.7847	-12.2938	37.8199	Mozambique	1304.63	5.16089	61.3691	0.402042	826.096	3.33889	61.2184	0.0631926	1378.63	2.03115	65.0216	0.105466	0.931007	2.77416	3.46863	0.537456	42.8685	7.77493	340	6.59	12.17	2.23	55.4559	16.767	9.55322	11.4473	12.7935	43.14	41.69	30.74	41.4153	0.36	0.85	0.34	0.609089	0.0147069	2017	2	952.945	831.982	1160.29
NIA_EDS19_86C	NIA_EDS19_8	2019-07-01 11:50:28	42	23.13	63.0093	-12.2938	37.8199	Mozambique	1395.04	5.04835	60.8781	0.410333	916.506	3.22636	60.7275	0.0714841	1392.66	1.78708	58.729	0.10863	0.937858	2.77416	3.46863	0.537456	42.8685	7.77493	340	6.59	12.17	2.23	55.4559	16.767	9.55322	11.4473	12.7935	43.14	41.69	30.74	41.4153	0.36	0.85	0.34	0.609089	0.0147069	2017	2	952.945	831.982	1160.29
NIA_EDS19_86D	NIA_EDS19_8	2019-07-01 11:51:14	41.61	21.93	62.6933	-12.2939	37.8199	Mozambique	960.278	4.52261	36.1307	0.440524	481.74	2.70062	35.9801	0.101675	1369.07	2.79767	65.0778	0.288972	0.930503	2.77416	3.46863	0.537456	42.8685	7.77493	340	6.59	12.17	2.23	55.4559	16.767	9.55322	11.4473	12.7935	43.14	41.69	30.74	41.4153	0.36	0.85	0.34	0.609089	0.0147069	2017	2	952.945	831.982	1160.29
NIA_EDS19_87A	NIA_EDS19_8	2019-07-01 11:54:50	40.07	21.77	57.9004	-12.2938	37.8197	Mozambique	564.033	2.13593	8.0454	0.347543	85.4944	0.313939	7.89477	0.00869419	1355.65	1.81458	79.6723	0.13787	0.915464	2.77416	3.46863	0.537456	42.8685	7.77493	340	6.59	12.17	2.23	55.4559	16.767	9.55322	11.4473	12.7935	43.14	41.69	30.74	41.4153	0.36	0.85	0.34	0.609089	0.0147069	2017	2	952.945	831.982	1160.29
NIA_EDS19_87B	NIA_EDS19_8	2019-07-01 11:55:45	37.93	21.09	52.0655	-12.2935	37.8196	Mozambique	580.855	2.10371	7.84039	0.350579	102.317	0.281717	7.68976	0.0117297	1384.45	1.38952	66.2217	0.158726	0.930097	2.77416	3.46863	0.537456	42.8685	7.77493	340	6.59	12.17	2.23	55.4559	16.767	9.55322	11.4473	12.7935	43.14	41.69	30.74	41.4153	0.36	0.85	0.34	0.609089	0.0147069	2017	2	952.945	831.982	1160.29
NIA_EDS19_87C	NIA_EDS19_8	2019-07-01 11:56:25	38.36	21.46	53.0391	-12.2932	37.8196	Mozambique	623.271	2.24401	12.1947	0.350979	144.732	0.422012	12.044	0.0121303	1372.29	1.45857	72.6794	0.115022	0.923177	2.77416	3.46863	0.537456	42.8685	7.77493	340	6.59	12.17	2.23	55.4559	16.767	9.55322	11.4473	12.7935	43.14	41.69	30.74	41.4153	0.36	0.85	0.34	0.609089	0.0147069	2017	2	952.945	831.982	1160.29
NIA_EDS19_87D	NIA_EDS19_8	2019-07-01 11:57:23	37.49	22.06	50.2139	-12.2928	37.8193	Mozambique	652.087	1.99564	2.85773	0.3419	173.549	0.173644	2.7071	0.00305051	1485.05	0.541628	14.7429	0.026105	0.984641	2.77416	3.46863	0.537456	42.8685	7.77493	340	6.59	12.17	2.23	55.4559	16.767	9.55322	11.4473	12.7935	43.14	41.69	30.74	41.4153	0.36	0.85	0.34	0.609089	0.0147069	2017	2	952.945	831.982	1160.29
NIA_EDS19_88A	NIA_EDS19_8	2019-07-01 11:59:53	40.77	22.69	59.3877	-12.2932	37.8198	Mozambique	814.091	2.17763	13.0951	0.3574	335.552	0.355637	12.9445	0.0185509	1448.38	0.559565	35.5602	0.0800786	0.962856	2.77416	3.46863	0.537456	42.8685	7.77493	340	6.59	12.17	2.23	55.4559	16.767	9.55322	11.4473	12.7935	43.14	41.69	30.74	41.4153	0.36	0.85	0.34	0.609089	0.0147069	2017	2	952.945	831.982	1160.29
NIA_EDS19_88B	NIA_EDS19_8	2019-07-01 12:00:30	39.52	23.56	54.939	-12.2929	37.8198	Mozambique	1744.42	3.21666	44.9316	0.424987	1265.88	1.39466	44.781	0.0861382	1453.07	0.583558	32.7149	0.0988826	0.965833	2.77416	3.46863	0.537456	42.8685	7.77493	340	6.59	12.17	2.23	55.4559	16.767	9.55322	11.4473	12.7935	43.14	41.69	30.74	41.4153	0.36	0.85	0.34	0.609089	0.0147069	2017	2	952.945	831.982	1160.29
NIA_EDS19_88C	NIA_EDS19_8	2019-07-01 12:01:08	43.46	24.39	66.8903	-12.2925	37.8197	Mozambique	506.798	1.8897	2.29964	0.346712	28.2593	0.0677045	2.14901	0.0078633	1385.23	1.20976	67.0433	0.385474	0.929328	2.77416	3.46863	0.537456	42.8685	7.77493	340	6.59	12.17	2.23	55.4559	16.767	9.55322	11.4473	12.7935	43.14	41.69	30.74	41.4153	0.36	0.85	0.34	0.609089	0.0147069	2017	2	952.945	831.982	1160.29
NIA_EDS19_88D	NIA_EDS19_8	2019-07-01 12:02:05	39.67	22	0	-12.2925	37.8196	Mozambique	571.92	2.46278	13.3711	0.45168	93.3819	0.640779	13.2205	0.112831	1276.71	3.19345	115.036	1.54273	0.875983	2.77416	3.46863	0.537456	42.8685	7.77493	340	6.59	12.17	2.23	55.4559	16.767	9.55322	11.4473	12.7935	43.14	41.69	30.74	41.4153	0.36	0.85	0.34	0.609089	0.0147069	2017	2	952.945	831.982	1160.29
NIA_EDS19_89A	NIA_EDS19_8	2019-07-01 12:49:14	34.08	30.28	37.2424	-12.2899	37.8177	Mozambique	533.222	2.0127	4.73144	0.340968	54.6833	0.1907	4.58081	0.00211942	1368.35	1.73945	72.9526	0.0530382	0.922705	2.77416	3.46863	0.537456	42.8685	7.77493	340	6.59	12.17	2.23	55.4559	16.767	9.55322	11.4473	12.7935	43.14	41.69	30.74	41.4153	0.36	0.85	0.34	0.609089	0.0147069	2017	2	952.945	831.982	1160.29
NIA_EDS19_89B	NIA_EDS19_8	2019-07-01 12:50:04	41.51	31.82	54.4635	-12.2894	37.8177	Mozambique	1693.8	5.47666	75.219	0.470021	1215.26	3.65466	75.0684	0.131172	1402.07	1.53698	55.1206	0.151345	0.941822	2.77416	3.46863	0.537456	42.8685	7.77493	340	6.59	12.17	2.23	55.4559	16.767	9.55322	11.4473	12.7935	43.14	41.69	30.74	41.4153	0.36	0.85	0.34	0.609089	0.0147069	2017	2	952.945	831.982	1160.29
NIA_EDS19_89C	NIA_EDS19_8	2019-07-01 12:50:46	43.04	29.94	60.6397	-12.2894	37.8176	Mozambique	1447.33	4.15698	57.5594	0.401469	968.792	2.33498	57.4088	0.0626196	1409.21	1.23809	53.1474	0.0910932	0.944057	2.77416	3.46863	0.537456	42.8685	7.77493	340	6.59	12.17	2.23	55.4559	16.767	9.55322	11.4473	12.7935	43.14	41.69	30.74	41.4153	0.36	0.85	0.34	0.609089	0.0147069	2017	2	952.945	831.982	1160.29
NIA_EDS19_89D	NIA_EDS19_8	2019-07-01 12:51:25	43.14	28.72	62.0181	-12.2892	37.8175	Mozambique	1142.78	3.07567	35.2357	0.38162	664.242	1.25367	35.0851	0.0427709	1421.79	0.978172	47.7958	0.0915562	0.94983	2.77416	3.46863	0.537456	42.8685	7.77493	340	6.59	12.17	2.23	55.4559	16.767	9.55322	11.4473	12.7935	43.14	41.69	30.74	41.4153	0.36	0.85	0.34	0.609089	0.0147069	2017	2	952.945	831.982	1160.29
NIA_EDS19_90A	NIA_EDS19_8	2019-07-01 12:54:19	40.6	24.75	57.2865	-12.2892	37.8176	Mozambique	1135.72	3.27232	37.9259	0.379839	657.177	1.45032	37.7753	0.04099	1413.01	1.13671	51.6926	0.0881396	0.945643	2.77416	3.46863	0.537456	42.8685	7.77493	340	6.59	12.17	2.23	55.4559	16.767	9.55322	11.4473	12.7935	43.14	41.69	30.74	41.4153	0.36	0.85	0.34	0.609089	0.0147069	2017	2	952.945	831.982	1160.29
NIA_EDS19_90B	NIA_EDS19_8	2019-07-01 12:54:56	48.51	27.66	82.8262	-12.289	37.8175	Mozambique	1885.69	3.57092	58.3632	0.442478	1407.15	1.74892	58.2126	0.103629	1442.96	0.653743	37.9918	0.106274	0.960274	2.77416	3.46863	0.537456	42.8685	7.77493	340	6.59	12.17	2.23	55.4559	16.767	9.55322	11.4473	12.7935	43.14	41.69	30.74	41.4153	0.36	0.85	0.34	0.609089	0.0147069	2017	2	952.945	831.982	1160.29
NIA_EDS19_90C	NIA_EDS19_8	2019-07-01 12:55:33	51.4	24.14	100.262	-12.2889	37.8174	Mozambique	1255.58	3.41379	47.5671	0.398102	777.038	1.5918	47.4165	0.059253	1408.77	1.05198	54.7122	0.107433	0.942487	2.77416	3.46863	0.537456	42.8685	7.77493	340	6.59	12.17	2.23	55.4559	16.767	9.55322	11.4473	12.7935	43.14	41.69	30.74	41.4153	0.36	0.85	0.34	0.609089	0.0147069	2017	2	952.945	831.982	1160.29
NIA_EDS19_91B	NIA_EDS19_8	2019-07-01 12:59:23	38.9	21.89	54.3043	-12.2893	37.8176	Mozambique	810.315	3.11727	26.6754	0.359506	331.776	1.29528	26.5248	0.0206573	1371.29	1.9515	69.7741	0.0853865	0.925971	2.77416	3.46863	0.537456	42.8685	7.77493	340	6.59	12.17	2.23	55.4559	16.767	9.55322	11.4473	12.7935	43.14	41.69	30.74	41.4153	0.36	0.85	0.34	0.609089	0.0147069	2017	2	952.945	831.982	1160.29
NIA_EDS19_91C	NIA_EDS19_8	2019-07-01 13:00:23	39.3	22.28	55.2051	-12.2893	37.8175	Mozambique	781.568	2.8101	22.6065	0.353028	303.03	0.988103	22.4559	0.0141786	1383.05	1.6439	65.2288	0.0647168	0.931008	2.77416	3.46863	0.537456	42.8685	7.77493	340	6.59	12.17	2.23	55.4559	16.767	9.55322	11.4473	12.7935	43.14	41.69	30.74	41.4153	0.36	0.85	0.34	0.609089	0.0147069	2017	2	952.945	831.982	1160.29
NIA_EDS19_91D	NIA_EDS19_8	2019-07-01 13:01:16	39.27	22.86	54.7051	-12.2893	37.8176	Mozambique	995.146	2.98474	29.2679	0.364954	516.608	1.16274	29.1173	0.0261052	1414.39	1.16042	50.7362	0.0714769	0.946645	2.77416	3.46863	0.537456	42.8685	7.77493	340	6.59	12.17	2.23	55.4559	16.767	9.55322	11.4473	12.7935	43.14	41.69	30.74	41.4153	0.36	0.85	0.34	0.609089	0.0147069	2017	2	952.945	831.982	1160.29
NIA_EDS19_92A	NIA_EDS19_8	2019-07-01 13:03:58	45.94	22.65	77.7585	-12.2891	37.8177	Mozambique	1205.3	3.1936	40.9608	0.382748	726.763	1.37161	40.8102	0.0438987	1416.86	0.974731	50.6361	0.0855887	0.946832	2.77416	3.46863	0.537456	42.8685	7.77493	340	6.59	12.17	2.23	55.4559	16.767	9.55322	11.4473	12.7935	43.14	41.69	30.74	41.4153	0.36	0.85	0.34	0.609089	0.0147069	2017	2	952.945	831.982	1160.29
NIA_EDS19_92B	NIA_EDS19_8	2019-07-01 13:05:01	40.77	21.76	60.1021	-12.2893	37.8176	Mozambique	573.352	2.31978	11.4716	0.346719	94.8138	0.497781	11.321	0.00787012	1311.99	2.51083	99.7013	0.108911	0.893334	2.77416	3.46863	0.537456	42.8685	7.77493	340	6.59	12.17	2.23	55.4559	16.767	9.55322	11.4473	12.7935	43.14	41.69	30.74	41.4153	0.36	0.85	0.34	0.609089	0.0147069	2017	2	952.945	831.982	1160.29
NIA_EDS19_92C	NIA_EDS19_8	2019-07-01 13:05:50	39.5	21.38	56.4454	-12.2888	37.8188	Mozambique	521.914	2.04222	6.70965	0.344239	43.3756	0.220221	6.55901	0.00538951	1273.81	2.35742	122.59	0.158284	0.868648	2.77416	3.46863	0.537456	42.8685	7.77493	340	6.59	12.17	2.23	55.4559	16.767	9.55322	11.4473	12.7935	43.14	41.69	30.74	41.4153	0.36	0.85	0.34	0.609089	0.0147069	2017	2	952.945	831.982	1160.29
NIA_EDS19_92D	NIA_EDS19_8	2019-07-01 13:06:52	41.84	22.33	63.1318	-12.2891	37.8177	Mozambique	1046.05	2.75485	19.4817	0.280124	567.516	0.932852	19.3311	-0.0587253	1451.71	0.869833	31.4713	-0.15023	0.967059	2.77416	3.46863	0.537456	42.8685	7.77493	340	6.59	12.17	2.23	55.4559	16.767	9.55322	11.4473	12.7935	43.14	41.69	30.74	41.4153	0.36	0.85	0.34	0.609089	0.0147069	2017	2	952.945	831.982	1160.29
NIA_EDS19_93A	NIA_EDS19_8	2019-07-01 13:09:14	42.08	21.5	64.6163	-12.289	37.8176	Mozambique	1568.5	3.45525	50.6027	0.406824	1089.97	1.63326	50.452	0.0679751	1433.92	0.783228	42.2424	0.0894318	0.95576	2.77416	3.46863	0.537456	42.8685	7.77493	340	6.59	12.17	2.23	55.4559	16.767	9.55322	11.4473	12.7935	43.14	41.69	30.74	41.4153	0.36	0.85	0.34	0.609089	0.0147069	2017	2	952.945	831.982	1160.29
NIA_EDS19_93B	NIA_EDS19_8	2019-07-01 13:09:55	44.6	22.18	73.0315	-12.2889	37.8175	Mozambique	1580.97	3.4781	50.2602	0.417619	1102.44	1.65611	50.1096	0.0787701	1435.16	0.78588	41.5169	0.102551	0.956523	2.77416	3.46863	0.537456	42.8685	7.77493	340	6.59	12.17	2.23	55.4559	16.767	9.55322	11.4473	12.7935	43.14	41.69	30.74	41.4153	0.36	0.85	0.34	0.609089	0.0147069	2017	2	952.945	831.982	1160.29
NIA_EDS19_93C	NIA_EDS19_8	2019-07-01 13:10:37	43.64	20.37	71.1086	-12.2886	37.8172	Mozambique	1170.77	2.8732	34.0722	0.376081	692.236	1.05121	33.9215	0.0372319	1429.71	0.791413	44.5889	0.0769022	0.953286	2.77416	3.46863	0.537456	42.8685	7.77493	340	6.59	12.17	2.23	55.4559	16.767	9.55322	11.4473	12.7935	43.14	41.69	30.74	41.4153	0.36	0.85	0.34	0.609089	0.0147069	2017	2	952.945	831.982	1160.29
NIA_EDS19_93D	NIA_EDS19_8	2019-07-01 13:11:16	44.01	20.21	72.6317	-12.2891	37.8176	Mozambique	860.616	3.26938	0.512675	0.342901	382.078	1.44738	0.36204	0.00405199	1490.57	2.05828	0.898907	0.0158088	0.999053	2.77416	3.46863	0.537456	42.8685	7.77493	340	6.59	12.17	2.23	55.4559	16.767	9.55322	11.4473	12.7935	43.14	41.69	30.74	41.4153	0.36	0.85	0.34	0.609089	0.0147069	2017	2	952.945	831.982	1160.29
NIA_EDS19_cal10	NIA_EDS19_9	calibration						Mozambique	4365.85	13.8847	71.6046	0.945696	3918.42	12.0762	71.4639	0.600179	1594.39	1.79115	18.5066	0.244227	0.982089
NIA_EDS19_94A	NIA_EDS19_9	2019-07-02 15:40:12	38.14	28.67	47.6015	-12.2864	37.8025	Mozambique	1137.63	4.61526	52.4629	0.449664	690.197	2.80669	52.3222	0.104146	1392.85	2.06465	67.2007	0.210186	0.929534	0.721515	0.874579	0.362919	20.0115	4.04267	300	10.04	31.79	3.04	0.889057	10.814	69.205	7.81062	51.5416	38.18	44.1725	43.92	41.9187	0.44	0.7175	0.396	0.555736	0.0132575	2011	8	952.945	831.982	1160.29
NIA_EDS19_94B	NIA_EDS19_9	2019-07-02 15:40:53	41.92	29.01	57.9454	-12.2865	37.8026	Mozambique	1191.94	5.60733	67.9686	0.440314	744.504	3.79876	67.8279	0.0947963	1365.96	2.54058	79.202	0.173937	0.916502	0.721515	0.874579	0.362919	20.0115	4.04267	300	10.04	31.79	3.04	0.889057	10.814	69.205	7.81062	51.5416	38.18	44.1725	43.92	41.9187	0.44	0.7175	0.396	0.555736	0.0132575	2011	8	952.945	831.982	1160.29
NIA_EDS19_94C	NIA_EDS19_9	2019-07-02 15:41:30	42.36	27.94	60.1928	-12.2865	37.8026	Mozambique	972.462	4.4751	49.1827	0.405128	525.03	2.66653	49.042	0.05961	1362.98	2.52332	81.0271	0.154758	0.914572	0.721515	0.874579	0.362919	20.0115	4.04267	300	10.04	31.79	3.04	0.889057	10.814	69.205	7.81062	51.5416	38.18	44.1725	43.92	41.9187	0.44	0.7175	0.396	0.555736	0.0132575	2011	8	952.945	831.982	1160.29
NIA_EDS19_94D	NIA_EDS19_9	2019-07-02 15:42:12	41.77	26.87	59.2231	-12.2865	37.8027	Mozambique	1705.1	6.26678	83.7457	0.511553	1257.67	4.45821	83.605	0.166035	1409.13	1.82082	59.6178	0.186044	0.937667	0.721515	0.874579	0.362919	20.0115	4.04267	300	10.04	31.79	3.04	0.889057	10.814	69.205	7.81062	51.5416	38.18	44.1725	43.92	41.9187	0.44	0.7175	0.396	0.555736	0.0132575	2011	8	952.945	831.982	1160.29
NIA_EDS19_95A	NIA_EDS19_9	2019-07-02 15:44:07	41.9	24.23	61.7821	-12.2862	37.8027	Mozambique	1004.89	4.22152	44.2642	0.439457	557.456	2.41295	44.1235	0.0939389	1386.68	2.18794	69.8543	0.23369	0.926654	0.721515	0.874579	0.362919	20.0115	4.04267	300	10.04	31.79	3.04	0.889057	10.814	69.205	7.81062	51.5416	38.18	44.1725	43.92	41.9187	0.44	0.7175	0.396	0.555736	0.0132575	2011	8	952.945	831.982	1160.29
NIA_EDS19_95B	NIA_EDS19_9	2019-07-02 15:44:48	43.54	23.67	67.8086	-12.2861	37.8027	Mozambique	648.409	2.33526	13.1758	0.377222	200.977	0.52669	13.0351	0.0317037	1416.88	1.35352	58.4871	0.223526	0.939092	0.721515	0.874579	0.362919	20.0115	4.04267	300	10.04	31.79	3.04	0.889057	10.814	69.205	7.81062	51.5416	38.18	44.1725	43.92	41.9187	0.44	0.7175	0.396	0.555736	0.0132575	2011	8	952.945	831.982	1160.29
NIA_EDS19_95C	NIA_EDS19_9	2019-07-02 15:45:27	42.78	23.87	65.0054	-12.2859	37.8029	Mozambique	763.098	2.634	21.7673	0.398992	315.665	0.82543	21.6266	0.0534741	1411.62	1.34552	61.5512	0.239146	0.935881	0.721515	0.874579	0.362919	20.0115	4.04267	300	10.04	31.79	3.04	0.889057	10.814	69.205	7.81062	51.5416	38.18	44.1725	43.92	41.9187	0.44	0.7175	0.396	0.555736	0.0132575	2011	8	952.945	831.982	1160.29
NIA_EDS19_95D	NIA_EDS19_9	2019-07-02 15:46:26	42.65	22.89	65.3963	-12.2857	37.8029	Mozambique	704.148	3.30547	25.9531	0.437836	256.716	1.4969	25.8124	0.092318	1349.4	2.86815	86.3522	0.485292	0.908638	0.721515	0.874579	0.362919	20.0115	4.04267	300	10.04	31.79	3.04	0.889057	10.814	69.205	7.81062	51.5416	38.18	44.1725	43.92	41.9187	0.44	0.7175	0.396	0.555736	0.0132575	2011	8	952.945	831.982	1160.29
NIA_EDS19_96A	NIA_EDS19_9	2019-07-02 15:48:45	48.6	22.86	88.7215	-12.2858	37.8031	Mozambique	1518.16	5.44627	71.4902	0.444291	1070.73	3.6377	71.3495	0.0987727	1409.76	1.74588	59.7881	0.130057	0.937527	0.721515	0.874579	0.362919	20.0115	4.04267	300	10.04	31.79	3.04	0.889057	10.814	69.205	7.81062	51.5416	38.18	44.1725	43.92	41.9187	0.44	0.7175	0.396	0.555736	0.0132575	2011	8	952.945	831.982	1160.29
NIA_EDS19_96B	NIA_EDS19_9	2019-07-02 15:49:25	43.12	23.26	66.6991	-12.2857	37.8033	Mozambique	982.351	4.90342	60.2249	0.419341	534.918	3.09486	60.0842	0.0738233	1334.25	2.81393	95.3826	0.184151	0.899018	0.721515	0.874579	0.362919	20.0115	4.04267	300	10.04	31.79	3.04	0.889057	10.814	69.205	7.81062	51.5416	38.18	44.1725	43.92	41.9187	0.44	0.7175	0.396	0.555736	0.0132575	2011	8	952.945	831.982	1160.29
NIA_EDS19_96C	NIA_EDS19_9	2019-07-02 15:50:10	40.07	22.37	57.4564	-12.286	37.8033	Mozambique	725.218	3.39666	2.02115	0.354041	277.786	1.58809	1.88048	0.00852359	1486.54	3.09787	6.40459	0.0456162	0.993276	0.721515	0.874579	0.362919	20.0115	4.04267	300	10.04	31.79	3.04	0.889057	10.814	69.205	7.81062	51.5416	38.18	44.1725	43.92	41.9187	0.44	0.7175	0.396	0.555736	0.0132575	2011	8	952.945	831.982	1160.29
NIA_EDS19_97A	NIA_EDS19_9	2019-07-02 15:53:22	44.01	24.09	69.0998	-12.2862	37.8028	Mozambique	1437.15	4.37608	49.9912	0.441647	989.717	2.56751	49.8505	0.0961294	1438.47	1.36026	46.1122	0.139725	0.952047	0.721515	0.874579	0.362919	20.0115	4.04267	300	10.04	31.79	3.04	0.889057	10.814	69.205	7.81062	51.5416	38.18	44.1725	43.92	41.9187	0.44	0.7175	0.396	0.555736	0.0132575	2011	8	952.945	831.982	1160.29
NIA_EDS19_97B	NIA_EDS19_9	2019-07-02 15:54:00	41.03	24.04	59.1596	-12.2862	37.8029	Mozambique	868.62	3.31087	32.6223	0.397478	421.187	1.50231	32.4816	0.0519598	1393.84	1.81225	68.4122	0.171963	0.928402	0.721515	0.874579	0.362919	20.0115	4.04267	300	10.04	31.79	3.04	0.889057	10.814	69.205	7.81062	51.5416	38.18	44.1725	43.92	41.9187	0.44	0.7175	0.396	0.555736	0.0132575	2011	8	952.945	831.982	1160.29
NIA_EDS19_97C	NIA_EDS19_9	2019-07-02 15:54:44	39.17	23.04	54.2857	-12.2861	37.8029	Mozambique	611.768	2.73245	19.0611	0.36136	164.335	0.923886	18.9204	0.0158426	1331.49	2.72863	97.565	0.128369	0.896754	0.721515	0.874579	0.362919	20.0115	4.04267	300	10.04	31.79	3.04	0.889057	10.814	69.205	7.81062	51.5416	38.18	44.1725	43.92	41.9187	0.44	0.7175	0.396	0.555736	0.0132575	2011	8	952.945	831.982	1160.29
NIA_EDS19_97D	NIA_EDS19_9	2019-07-02 15:55:25	38.27	23.2	51.6128	-12.2861	37.8028	Mozambique	1374.39	2.82659	19.7918	0.357779	926.957	1.01802	19.6511	0.0122607	1493.34	0.597828	20.1485	0.0197535	0.979241	0.721515	0.874579	0.362919	20.0115	4.04267	300	10.04	31.79	3.04	0.889057	10.814	69.205	7.81062	51.5416	38.18	44.1725	43.92	41.9187	0.44	0.7175	0.396	0.555736	0.0132575	2011	8	952.945	831.982	1160.29
NIA_EDS19_98A	NIA_EDS19_9	2019-07-02 15:57:48	41.33	24.67	59.6064	-12.2853	37.8032	Mozambique	1612.44	3.73453	46.9156	0.44021	1165.01	1.92597	46.7749	0.0946921	1459.82	0.879713	37.3028	0.118663	0.9614	0.721515	0.874579	0.362919	20.0115	4.04267	300	10.04	31.79	3.04	0.889057	10.814	69.205	7.81062	51.5416	38.18	44.1725	43.92	41.9187	0.44	0.7175	0.396	0.555736	0.0132575	2011	8	952.945	831.982	1160.29
NIA_EDS19_98B	NIA_EDS19_9	2019-07-02 15:58:33	41	24.88	58.4126	-12.2851	37.8032	Mozambique	924.362	3.94084	43.4377	0.400674	476.929	2.13227	43.297	0.0551565	1369.86	2.23247	79.1475	0.158434	0.916773	0.721515	0.874579	0.362919	20.0115	4.04267	300	10.04	31.79	3.04	0.889057	10.814	69.205	7.81062	51.5416	38.18	44.1725	43.92	41.9187	0.44	0.7175	0.396	0.555736	0.0132575	2011	8	952.945	831.982	1160.29
NIA_EDS19_98C	NIA_EDS19_9	2019-07-02 15:59:10	38.78	24.24	52.3319	-12.2851	37.8032	Mozambique	1005	3.69299	40.3547	0.403101	557.57	1.88442	40.214	0.0575834	1402	1.72721	64.355	0.144802	0.932728	0.721515	0.874579	0.362919	20.0115	4.04267	300	10.04	31.79	3.04	0.889057	10.814	69.205	7.81062	51.5416	38.18	44.1725	43.92	41.9187	0.44	0.7175	0.396	0.555736	0.0132575	2011	8	952.945	831.982	1160.29
NIA_EDS19_98D	NIA_EDS19_9	2019-07-02 15:59:54	39.03	23.99	53.2145	-12.2851	37.8032	Mozambique	1472.05	2.68886	20.3415	0.391827	1024.62	0.880292	20.2008	0.0463096	1497.31	0.468919	18.7878	0.0676787	0.980666	0.721515	0.874579	0.362919	20.0115	4.04267	300	10.04	31.79	3.04	0.889057	10.814	69.205	7.81062	51.5416	38.18	44.1725	43.92	41.9187	0.44	0.7175	0.396	0.555736	0.0132575	2011	8	952.945	831.982	1160.29
NIA_EDS19_99A	NIA_EDS19_9	2019-07-02 16:01:49	38.68	23.21	52.7589	-12.2854	37.8034	Mozambique	1138.75	5.21788	58.1513	0.399027	691.315	3.40931	58.0106	0.053509	1376.71	2.47488	73.5245	0.106567	0.922583	0.721515	0.874579	0.362919	20.0115	4.04267	300	10.04	31.79	3.04	0.889057	10.814	69.205	7.81062	51.5416	38.18	44.1725	43.92	41.9187	0.44	0.7175	0.396	0.555736	0.0132575	2011	8	952.945	831.982	1160.29
NIA_EDS19_99B	NIA_EDS19_9	2019-07-02 16:02:25	41.9	24.2	61.8065	-12.2854	37.8034	Mozambique	808.29	2.96387	23.6094	0.37313	360.858	1.1553	23.4687	0.0276123	1413.22	1.64926	58.4952	0.108145	0.938935	0.721515	0.874579	0.362919	20.0115	4.04267	300	10.04	31.79	3.04	0.889057	10.814	69.205	7.81062	51.5416	38.18	44.1725	43.92	41.9187	0.44	0.7175	0.396	0.555736	0.0132575	2011	8	952.945	831.982	1160.29
NIA_EDS19_99C	NIA_EDS19_9	2019-07-02 16:03:10	40.37	23.09	57.8394	-12.2854	37.8034	Mozambique	923.265	3.88352	41.4552	0.388524	475.832	2.07495	41.3146	0.043006	1375.88	2.18703	76.0303	0.124361	0.920111	0.721515	0.874579	0.362919	20.0115	4.04267	300	10.04	31.79	3.04	0.889057	10.814	69.205	7.81062	51.5416	38.18	44.1725	43.92	41.9187	0.44	0.7175	0.396	0.555736	0.0132575	2011	8	952.945	831.982	1160.29
NIA_EDS19_99D	NIA_EDS19_9	2019-07-02 16:04:03	39.92	23.04	56.5069	-12.2854	37.8034	Mozambique	619.182	2.53432	13.9219	0.366774	171.749	0.725756	13.7812	0.0212561	1385.74	2.13451	70.7673	0.171515	0.92572	0.721515	0.874579	0.362919	20.0115	4.04267	300	10.04	31.79	3.04	0.889057	10.814	69.205	7.81062	51.5416	38.18	44.1725	43.92	41.9187	0.44	0.7175	0.396	0.555736	0.0132575	2011	8	952.945	831.982	1160.29
NIA_EDS19_100A	NIA_EDS19_9	2019-07-02 16:06:32	37.71	23.28	50.0211	-12.2855	37.8033	Mozambique	749.129	3.30596	29.1548	0.388616	301.696	1.49739	29.0141	0.043098	1359.89	2.46031	83.2339	0.194277	0.912267	0.721515	0.874579	0.362919	20.0115	4.04267	300	10.04	31.79	3.04	0.889057	10.814	69.205	7.81062	51.5416	38.18	44.1725	43.92	41.9187	0.44	0.7175	0.396	0.555736	0.0132575	2011	8	952.945	831.982	1160.29
NIA_EDS19_100B	NIA_EDS19_9	2019-07-02 16:07:29	39	24.3	52.9122	-12.2853	37.8034	Mozambique	864.167	4.14138	40.6335	0.393221	416.735	2.33282	40.4929	0.0477036	1355.13	2.76518	83.8025	0.155132	0.911438	0.721515	0.874579	0.362919	20.0115	4.04267	300	10.04	31.79	3.04	0.889057	10.814	69.205	7.81062	51.5416	38.18	44.1725	43.92	41.9187	0.44	0.7175	0.396	0.555736	0.0132575	2011	8	952.945	831.982	1160.29
NIA_EDS19_100C	NIA_EDS19_9	2019-07-02 16:08:06	38.14	24.23	50.5645	-12.2853	37.8035	Mozambique	606.372	2.72749	16.5295	0.366303	158.939	0.918924	16.3888	0.0207848	1346.28	2.8373	88.3506	0.176068	0.906525	0.721515	0.874579	0.362919	20.0115	4.04267	300	10.04	31.79	3.04	0.889057	10.814	69.205	7.81062	51.5416	38.18	44.1725	43.92	41.9187	0.44	0.7175	0.396	0.555736	0.0132575	2011	8	952.945	831.982	1160.29
NIA_EDS19_100D	NIA_EDS19_9	2019-07-02 16:09:17	36.32	24.1	45.8787	-12.2851	37.8037	Mozambique	1093.1	3.61475	33.5303	0.415813	645.669	1.80618	33.3896	0.0702947	1435.22	1.4635	47.2366	0.156265	0.95083	0.721515	0.874579	0.362919	20.0115	4.04267	300	10.04	31.79	3.04	0.889057	10.814	69.205	7.81062	51.5416	38.18	44.1725	43.92	41.9187	0.44	0.7175	0.396	0.555736	0.0132575	2011	8	952.945	831.982	1160.29
NIA_EDS19_101B	NIA_EDS19_9	2019-07-02 16:12:44	48.51	26.52	84.1314	-12.2855	37.8035	Mozambique	2364.16	8.13322	121.427	0.499689	1916.73	6.32465	121.286	0.154171	1415.19	1.70221	56.9934	0.113838	0.940488	0.721515	0.874579	0.362919	20.0115	4.04267	300	10.04	31.79	3.04	0.889057	10.814	69.205	7.81062	51.5416	38.18	44.1725	43.92	41.9187	0.44	0.7175	0.396	0.555736	0.0132575	2011	8	952.945	831.982	1160.29
NIA_EDS19_101C	NIA_EDS19_9	2019-07-02 16:13:34	47.45	25.58	80.7789	-12.2854	37.8036	Mozambique	1621.63	4.41136	53.5718	0.420159	1174.2	2.6028	53.4311	0.0746416	1448.12	1.1701	41.9387	0.0920606	0.956476	0.721515	0.874579	0.362919	20.0115	4.04267	300	10.04	31.79	3.04	0.889057	10.814	69.205	7.81062	51.5416	38.18	44.1725	43.92	41.9187	0.44	0.7175	0.396	0.555736	0.0132575	2011	8	952.945	831.982	1160.29
NIA_EDS19_101D	NIA_EDS19_9	2019-07-02 16:14:42	45.2	22.01	75.4861	-12.2855	37.8039	Mozambique	1223.45	3.41143	32.7782	0.422892	776.017	1.60286	32.6375	0.0773737	1454.32	1.09498	38.9281	0.145015	0.95964	0.721515	0.874579	0.362919	20.0115	4.04267	300	10.04	31.79	3.04	0.889057	10.814	69.205	7.81062	51.5416	38.18	44.1725	43.92	41.9187	0.44	0.7175	0.396	0.555736	0.0132575	2011	8	952.945	831.982	1160.29
NIA_EDS19_102A	NIA_EDS19_9	2019-07-02 16:17:12	44.23	20.99	72.7451	-12.2848	37.803	Mozambique	2480.31	5.79141	89.9859	0.554128	2032.88	3.98284	89.8452	0.20861	1451.7	1.03676	40.8336	0.148981	0.957675	0.721515	0.874579	0.362919	20.0115	4.04267	300	10.04	31.79	3.04	0.889057	10.814	69.205	7.81062	51.5416	38.18	44.1725	43.92	41.9187	0.44	0.7175	0.396	0.555736	0.0132575	2011	8	952.945	831.982	1160.29
NIA_EDS19_102B	NIA_EDS19_9	2019-07-02 16:17:56	48.65	21.88	90.0741	-12.2847	37.8029	Mozambique	1657.55	6.34517	86.7668	0.502599	1210.12	4.5366	86.6262	0.157081	1400.64	1.91403	63.8123	0.181824	0.933197	0.721515	0.874579	0.362919	20.0115	4.04267	300	10.04	31.79	3.04	0.889057	10.814	69.205	7.81062	51.5416	38.18	44.1725	43.92	41.9187	0.44	0.7175	0.396	0.555736	0.0132575	2011	8	952.945	831.982	1160.29
NIA_EDS19_102C	NIA_EDS19_9	2019-07-02 16:18:40	50.37	21.1	99.1125	-12.2847	37.8031	Mozambique	1276.46	5.98951	75.0725	0.464702	829.03	4.18094	74.9318	0.119184	1367.26	2.51348	78.651	0.196576	0.917107	0.721515	0.874579	0.362919	20.0115	4.04267	300	10.04	31.79	3.04	0.889057	10.814	69.205	7.81062	51.5416	38.18	44.1725	43.92	41.9187	0.44	0.7175	0.396	0.555736	0.0132575	2011	8	952.945	831.982	1160.29
NIA_EDS19_102D	NIA_EDS19_9	2019-07-02 16:19:26	48.92	20.28	93.17	-12.2847	37.8031	Mozambique	1329.41	6.10476	66.3773	0.459796	881.973	4.2962	66.2366	0.114278	1389.28	2.46683	66.4033	0.180022	0.930146	0.721515	0.874579	0.362919	20.0115	4.04267	300	10.04	31.79	3.04	0.889057	10.814	69.205	7.81062	51.5416	38.18	44.1725	43.92	41.9187	0.44	0.7175	0.396	0.555736	0.0132575	2011	8	952.945	831.982	1160.29
NIA_EDS19_103A	NIA_EDS19_9	2019-07-02 16:22:20	40.55	19.29	61.2803	-12.2848	37.8031	Mozambique	665.202	3.59704	29.2242	0.376255	217.77	1.78847	29.0835	0.0307367	1295.35	3.87785	110.102	0.182842	0.882183	0.721515	0.874579	0.362919	20.0115	4.04267	300	10.04	31.79	3.04	0.889057	10.814	69.205	7.81062	51.5416	38.18	44.1725	43.92	41.9187	0.44	0.7175	0.396	0.555736	0.0132575	2011	8	952.945	831.982	1160.29
NIA_EDS19_103B	NIA_EDS19_9	2019-07-02 16:23:02	40.67	19.93	61.1827	-12.2848	37.8031	Mozambique	665.273	3.7396	28.7412	0.368805	217.84	1.93103	28.6005	0.0232873	1294.9	4.18415	108.2	0.138435	0.883946	0.721515	0.874579	0.362919	20.0115	4.04267	300	10.04	31.79	3.04	0.889057	10.814	69.205	7.81062	51.5416	38.18	44.1725	43.92	41.9187	0.44	0.7175	0.396	0.555736	0.0132575	2011	8	952.945	831.982	1160.29
NIA_EDS19_103C	NIA_EDS19_9	2019-07-02 16:23:41	39.87	20.34	58.3336	-12.2848	37.803	Mozambique	551.725	2.38825	8.00958	0.418095	104.292	0.579686	7.86891	0.0725771	1384.92	2.80599	66.5034	0.963833	0.929843	0.721515	0.874579	0.362919	20.0115	4.04267	300	10.04	31.79	3.04	0.889057	10.814	69.205	7.81062	51.5416	38.18	44.1725	43.92	41.9187	0.44	0.7175	0.396	0.555736	0.0132575	2011	8	952.945	831.982	1160.29
NIA_EDS19_104A	NIA_EDS19_9	2019-07-02 16:28:09	38.24	23.87	51.0798	-12.286	37.8036	Mozambique	542.267	2.39452	9.86026	0.355517	94.8347	0.585956	9.71959	0.00999931	1344.99	3.02927	87.7319	0.141825	0.907038	0.721515	0.874579	0.362919	20.0115	4.04267	300	10.04	31.79	3.04	0.889057	10.814	69.205	7.81062	51.5416	38.18	44.1725	43.92	41.9187	0.44	0.7175	0.396	0.555736	0.0132575	2011	8	952.945	831.982	1160.29
NIA_EDS19_104B	NIA_EDS19_9	2019-07-02 16:28:47	38.66	24.2	52.0227	-12.2859	37.8038	Mozambique	590.083	2.65863	14.7143	0.365072	142.651	0.850063	14.5736	0.0195536	1346.59	2.92504	87.5556	0.184594	0.907307	0.721515	0.874579	0.362919	20.0115	4.04267	300	10.04	31.79	3.04	0.889057	10.814	69.205	7.81062	51.5416	38.18	44.1725	43.92	41.9187	0.44	0.7175	0.396	0.555736	0.0132575	2011	8	952.945	831.982	1160.29
NIA_EDS19_104C	NIA_EDS19_9	2019-07-02 16:29:26	41.49	25.7	59.2897	-12.2858	37.8038	Mozambique	940.356	3.87308	38.7529	0.402156	492.923	2.06451	38.6122	0.0566382	1388.61	2.12002	69.2284	0.159567	0.927357	0.721515	0.874579	0.362919	20.0115	4.04267	300	10.04	31.79	3.04	0.889057	10.814	69.205	7.81062	51.5416	38.18	44.1725	43.92	41.9187	0.44	0.7175	0.396	0.555736	0.0132575	2011	8	952.945	831.982	1160.29
NIA_EDS19_104D	NIA_EDS19_9	2019-07-02 16:32:16	37.25	24.36	48.1009	-12.2858	37.8037	Mozambique	935.936	4.54239	48.9538	0.402526	488.503	2.73382	48.8131	0.0570086	1351.48	2.75697	85.9478	0.157729	0.909154	0.721515	0.874579	0.362919	20.0115	4.04267	300	10.04	31.79	3.04	0.889057	10.814	69.205	7.81062	51.5416	38.18	44.1725	43.92	41.9187	0.44	0.7175	0.396	0.555736	0.0132575	2011	8	952.945	831.982	1160.29
NIA_EDS19_105A	NIA_EDS19_9	2019-07-02 16:34:30	36.6	25.45	45.7579	-12.2855	37.8036	Mozambique	534.585	2.49866	9.78119	0.390963	87.1529	0.690095	9.64052	0.0454453	1325.4	3.82555	93.3086	0.691167	0.900401	0.721515	0.874579	0.362919	20.0115	4.04267	300	10.04	31.79	3.04	0.889057	10.814	69.205	7.81062	51.5416	38.18	44.1725	43.92	41.9187	0.44	0.7175	0.396	0.555736	0.0132575	2011	8	952.945	831.982	1160.29
NIA_EDS19_105C	NIA_EDS19_9	2019-07-02 16:35:48	37.25	26.22	46.9181	-12.2857	37.8037	Mozambique	943.809	3.00648	21.8836	0.37237	496.376	1.19791	21.7429	0.0268523	1449.5	1.27513	40.4095	0.0784185	0.958035	0.721515	0.874579	0.362919	20.0115	4.04267	300	10.04	31.79	3.04	0.889057	10.814	69.205	7.81062	51.5416	38.18	44.1725	43.92	41.9187	0.44	0.7175	0.396	0.555736	0.0132575	2011	8	952.945	831.982	1160.29
NIA_EDS19_105D	NIA_EDS19_9	2019-07-02 16:36:23	36.05	25.92	44.121	-12.2857	37.8037	Mozambique	719.51	3.00928	0.981404	0.333121	272.078	1.20071	0.840733	-0.0123969	1501.02	2.41465	2.95195	-0.068397	0.996919	0.721515	0.874579	0.362919	20.0115	4.04267	300	10.04	31.79	3.04	0.889057	10.814	69.205	7.81062	51.5416	38.18	44.1725	43.92	41.9187	0.44	0.7175	0.396	0.555736	0.0132575	2011	8	952.945	831.982	1160.29
NIA_EDS19_106B	NIA_EDS19_9	2019-07-02 16:40:46	39.17	27.67	51.0198	-12.2852	37.804	Mozambique	989.042	3.82752	40.9381	0.39794	541.609	2.01895	40.7974	0.0524216	1395.46	1.89616	66.8991	0.135074	0.92995	0.721515	0.874579	0.362919	20.0115	4.04267	300	10.04	31.79	3.04	0.889057	10.814	69.205	7.81062	51.5416	38.18	44.1725	43.92	41.9187	0.44	0.7175	0.396	0.555736	0.0132575	2011	8	952.945	831.982	1160.29
NIA_EDS19_106C	NIA_EDS19_9	2019-07-02 16:41:33	38.9	27.3	50.5431	-12.2851	37.8042	Mozambique	937.991	4.0913	43.9663	0.373935	490.558	2.28273	43.8256	0.0284173	1370.82	2.32523	77.9428	0.0794151	0.917989	0.721515	0.874579	0.362919	20.0115	4.04267	300	10.04	31.79	3.04	0.889057	10.814	69.205	7.81062	51.5416	38.18	44.1725	43.92	41.9187	0.44	0.7175	0.396	0.555736	0.0132575	2011	8	952.945	831.982	1160.29
NIA_EDS19_106D	NIA_EDS19_9	2019-07-02 16:42:28	39.27	27.06	51.7266	-12.2851	37.8042	Mozambique	805.837	2.86923	23.6702	0.425609	358.405	1.06066	23.5295	0.0800907	1413.74	1.52509	59.07	0.315943	0.938394	0.721515	0.874579	0.362919	20.0115	4.04267	300	10.04	31.79	3.04	0.889057	10.814	69.205	7.81062	51.5416	38.18	44.1725	43.92	41.9187	0.44	0.7175	0.396	0.555736	0.0132575	2011	8	952.945	831.982	1160.29
NIA_EDS19_107A	NIA_EDS19_9	2019-07-02 16:44:46	37.76	26.35	48.1498	-12.2851	37.8043	Mozambique	1135.39	3.11957	37.1486	0.38709	687.956	1.311	37.008	0.0415717	1437.5	0.99855	49.2152	0.0868709	0.948952	0.721515	0.874579	0.362919	20.0115	4.04267	300	10.04	31.79	3.04	0.889057	10.814	69.205	7.81062	51.5416	38.18	44.1725	43.92	41.9187	0.44	0.7175	0.396	0.555736	0.0132575	2011	8	952.945	831.982	1160.29
NIA_EDS19_107B	NIA_EDS19_9	2019-07-02 16:45:33	37.22	26.21	46.848	-12.2851	37.8042	Mozambique	808.87	2.98369	28.2425	0.372857	361.438	1.17512	28.1018	0.0273388	1394.75	1.65297	69.0168	0.105505	0.927859	0.721515	0.874579	0.362919	20.0115	4.04267	300	10.04	31.79	3.04	0.889057	10.814	69.205	7.81062	51.5416	38.18	44.1725	43.92	41.9187	0.44	0.7175	0.396	0.555736	0.0132575	2011	8	952.945	831.982	1160.29
NIA_EDS19_107C	NIA_EDS19_9	2019-07-02 16:46:17	37.76	26.43	48.0975	-12.2851	37.8042	Mozambique	806.02	2.8838	25.3596	0.369216	358.588	1.07524	25.219	0.0236977	1406.77	1.53763	62.9667	0.0929743	0.934293	0.721515	0.874579	0.362919	20.0115	4.04267	300	10.04	31.79	3.04	0.889057	10.814	69.205	7.81062	51.5416	38.18	44.1725	43.92	41.9187	0.44	0.7175	0.396	0.555736	0.0132575	2011	8	952.945	831.982	1160.29
NIA_EDS19_107D	NIA_EDS19_9	2019-07-02 16:47:22	39.7	26.28	53.4962	-12.2856	37.804	Mozambique	1288.12	6.15269	23.7956	0.379969	840.684	4.34413	23.6549	0.0344515	1456.46	2.7434	26.0823	0.0596904	0.972632	0.721515	0.874579	0.362919	20.0115	4.04267	300	10.04	31.79	3.04	0.889057	10.814	69.205	7.81062	51.5416	38.18	44.1725	43.92	41.9187	0.44	0.7175	0.396	0.555736	0.0132575	2011	8	952.945	831.982	1160.29
NIA_EDS19_108A	NIA_EDS19_9	2019-07-02 16:50:37	39.03	25.86	51.9053	-12.2856	37.8039	Mozambique	978.509	4.20481	37.9957	0.427474	531.076	2.39624	37.855	0.081956	1396.7	2.29719	63.3617	0.215554	0.933463	0.721515	0.874579	0.362919	20.0115	4.04267	300	10.04	31.79	3.04	0.889057	10.814	69.205	7.81062	51.5416	38.18	44.1725	43.92	41.9187	0.44	0.7175	0.396	0.555736	0.0132575	2011	8	952.945	831.982	1160.29
NIA_EDS19_108C	NIA_EDS19_9	2019-07-02 16:51:57	41.97	26.66	60.0211	-12.2857	37.8038	Mozambique	1603.31	6.66567	80.4447	0.530053	1155.88	4.8571	80.304	0.184535	1401.04	2.14603	61.9488	0.22369	0.935039	0.721515	0.874579	0.362919	20.0115	4.04267	300	10.04	31.79	3.04	0.889057	10.814	69.205	7.81062	51.5416	38.18	44.1725	43.92	41.9187	0.44	0.7175	0.396	0.555736	0.0132575	2011	8	952.945	831.982	1160.29
NIA_EDS19_108D	NIA_EDS19_9	2019-07-02 16:52:35	45.25	26.88	70.9543	-12.2857	37.8038	Mozambique	1336.97	5.01409	59.1087	0.50659	889.537	3.20552	58.968	0.161073	1409.06	1.85091	59.4482	0.255162	0.937831	0.721515	0.874579	0.362919	20.0115	4.04267	300	10.04	31.79	3.04	0.889057	10.814	69.205	7.81062	51.5416	38.18	44.1725	43.92	41.9187	0.44	0.7175	0.396	0.555736	0.0132575	2011	8	952.945	831.982	1160.29
NIA_EDS19_cal11	NIA_EDS19_9	calibration						Mozambique	4617.39	14.705	95.9396	1.11169
NIA_EDS19_cal12	NIA_EDS19_10	calibration						Mozambique	4922.28	15.4596	110.978	1.13516	4419.37	13.6269	110.675	0.796516	1582.77	1.779	25.227	0.285287	0.975569
NIA_EDS19_109A	NIA_EDS19_10	2019-07-07 13:07:20	44.36	28.4	66.367	-12.1429	37.5382	Mozambique	893.284	3.01693	35.3074	0.376416	390.376	1.18426	35.004	0.0377676	1446.9	1.60001	82.5716	0.139992	0.917711	1.00456	1.94698	0.471621	29.3519	3.734	500	7.73	18	2.75		8.34302	8.4635	7.70617	8.3245	45.02	44.1725	40.91	43.9717	0.34	0.7175	0.4	0.562976	0.0128031	2018	1	1088.42	875.12	1245.85
NIA_EDS19_109B	NIA_EDS19_10	2019-07-07 13:08:25	38.19	26.56	49.1421	-12.1429	37.5382	Mozambique	1456.03	3.58832	51.4224	0.382475	953.124	1.75565	51.119	0.0438271	1508.56	1.01291	51.4936	0.0693724	0.949097	1.00456	1.94698	0.471621	29.3519	3.734	500	7.73	18	2.75		8.34302	8.4635	7.70617	8.3245	45.02	44.1725	40.91	43.9717	0.34	0.7175	0.4	0.562976	0.0128031	2018	1	1088.42	875.12	1245.85
NIA_EDS19_109C	NIA_EDS19_10	2019-07-07 13:09:02	40.09	26.87	54.1835	-12.1429	37.5382	Mozambique	1262.19	4.4666	66.7452	0.39566	759.28	2.63393	66.4418	0.0570116	1447.48	1.83036	80.614	0.108694	0.919535	1.00456	1.94698	0.471621	29.3519	3.734	500	7.73	18	2.75		8.34302	8.4635	7.70617	8.3245	45.02	44.1725	40.91	43.9717	0.34	0.7175	0.4	0.562976	0.0128031	2018	1	1088.42	875.12	1245.85
NIA_EDS19_109D	NIA_EDS19_10	2019-07-07 13:09:44	42.39	26.25	61.7014	-12.1429	37.5382	Mozambique	586.291	2.38814	12.5998	0.353656	83.3827	0.555467	12.2964	0.0150076	1349.09	3.276	126.619	0.242831	0.871483	1.00456	1.94698	0.471621	29.3519	3.734	500	7.73	18	2.75		8.34302	8.4635	7.70617	8.3245	45.02	44.1725	40.91	43.9717	0.34	0.7175	0.4	0.562976	0.0128031	2018	1	1088.42	875.12	1245.85
NIA_EDS19_110A	NIA_EDS19_10	2019-07-07 13:12:07	39.67	24.29	54.8523	-12.1429	37.5382	Mozambique	1363.75	3.34522	31.7695	0.37631	860.844	1.51254	31.4661	0.0376618	1536.49	0.984089	35.7443	0.0672259	0.964736	1.00456	1.94698	0.471621	29.3519	3.734	500	7.73	18	2.75		8.34302	8.4635	7.70617	8.3245	45.02	44.1725	40.91	43.9717	0.34	0.7175	0.4	0.562976	0.0128031	2018	1	1088.42	875.12	1245.85
NIA_EDS19_110B	NIA_EDS19_10	2019-07-07 13:12:49	56.35	27.27	122.111	-12.1428	37.5383	Mozambique	2180	4.31746	80.021	0.462348	1677.09	2.48479	79.7176	0.1237	1520.55	0.821209	45.9997	0.112161	0.954624	1.00456	1.94698	0.471621	29.3519	3.734	500	7.73	18	2.75		8.34302	8.4635	7.70617	8.3245	45.02	44.1725	40.91	43.9717	0.34	0.7175	0.4	0.562976	0.0128031	2018	1	1088.42	875.12	1245.85
NIA_EDS19_110C	NIA_EDS19_10	2019-07-07 13:13:39	55.97	24.67	124.21	-12.1428	37.5383	Mozambique	1427.2	4.43905	65.2577	0.395717	924.295	2.60637	64.9543	0.0570689	1476.84	1.51803	66.0521	0.0911908	0.93434	1.00456	1.94698	0.471621	29.3519	3.734	500	7.73	18	2.75		8.34302	8.4635	7.70617	8.3245	45.02	44.1725	40.91	43.9717	0.34	0.7175	0.4	0.562976	0.0128031	2018	1	1088.42	875.12	1245.85
NIA_EDS19_110D	NIA_EDS19_10	2019-07-07 13:14:28	48.86	22.53	90.269	-12.1427	37.5384	Mozambique	1004.08	2.63186	16.4193	0.37684	501.175	0.79919	16.1159	0.0381917	1544.79	0.897946	31.6149	0.117728	0.968846	1.00456	1.94698	0.471621	29.3519	3.734	500	7.73	18	2.75		8.34302	8.4635	7.70617	8.3245	45.02	44.1725	40.91	43.9717	0.34	0.7175	0.4	0.562976	0.0128031	2018	1	1088.42	875.12	1245.85
NIA_EDS19_111A	NIA_EDS19_10	2019-07-07 13:19:17	40.02	20.43	58.7355	-12.1428	37.5384	Mozambique	612.654	2.38587	12.105	0.35797	109.746	0.553199	11.8016	0.0193219	1410.25	2.59124	96.5169	0.248305	0.902906	1.00456	1.94698	0.471621	29.3519	3.734	500	7.73	18	2.75		8.34302	8.4635	7.70617	8.3245	45.02	44.1725	40.91	43.9717	0.34	0.7175	0.4	0.562976	0.0128031	2018	1	1088.42	875.12	1245.85
NIA_EDS19_111B	NIA_EDS19_10	2019-07-07 13:20:07	39.25	21.18	55.8366	-12.1428	37.5384	Mozambique	580.505	2.62441	14.1584	0.354896	77.5973	0.791735	13.855	0.0162478	1294.28	4.81375	147.078	0.271024	0.8485	1.00456	1.94698	0.471621	29.3519	3.734	500	7.73	18	2.75		8.34302	8.4635	7.70617	8.3245	45.02	44.1725	40.91	43.9717	0.34	0.7175	0.4	0.562976	0.0128031	2018	1	1088.42	875.12	1245.85
NIA_EDS19_111C	NIA_EDS19_10	2019-07-07 13:21:48	38.46	22.55	52.5857	-12.1426	37.538	Mozambique	1012.53	3.00559	33.7789	0.378756	509.617	1.17292	33.4755	0.0401081	1486.98	1.24753	62.165	0.117037	0.938361	1.00456	1.94698	0.471621	29.3519	3.734	500	7.73	18	2.75		8.34302	8.4635	7.70617	8.3245	45.02	44.1725	40.91	43.9717	0.34	0.7175	0.4	0.562976	0.0128031	2018	1	1088.42	875.12	1245.85
NIA_EDS19_111D	NIA_EDS19_10	2019-07-07 13:22:28	38.17	23.24	51.3082	-12.1426	37.5381	Mozambique	808.871	2.50923	20.9045	0.363979	305.963	0.676557	20.6011	0.0253312	1485.03	1.19699	63.6375	0.122956	0.936916	1.00456	1.94698	0.471621	29.3519	3.734	500	7.73	18	2.75		8.34302	8.4635	7.70617	8.3245	45.02	44.1725	40.91	43.9717	0.34	0.7175	0.4	0.562976	0.0128031	2018	1	1088.42	875.12	1245.85
NIA_EDS19_112A	NIA_EDS19_10	2019-07-07 13:48:20	41.23	24.79	59.198	-12.1426	37.538	Mozambique	825.737	2.9758	26.2421	0.368336	322.829	1.14313	25.9387	0.0296884	1457.5	1.88128	74.532	0.134046	0.925628	1.00456	1.94698	0.471621	29.3519	3.734	500	7.73	18	2.75		8.34302	8.4635	7.70617	8.3245	45.02	44.1725	40.91	43.9717	0.34	0.7175	0.4	0.562976	0.0128031	2018	1	1088.42	875.12	1245.85
NIA_EDS19_112B	NIA_EDS19_10	2019-07-07 13:49:03	39.22	24.77	53.2078	-12.1426	37.538	Mozambique	740.752	2.95885	27.0187	0.36536	237.844	1.12617	26.7153	0.0267123	1405.38	2.42564	100.466	0.157849	0.89902	1.00456	1.94698	0.471621	29.3519	3.734	500	7.73	18	2.75		8.34302	8.4635	7.70617	8.3245	45.02	44.1725	40.91	43.9717	0.34	0.7175	0.4	0.562976	0.0128031	2018	1	1088.42	875.12	1245.85
NIA_EDS19_112C	NIA_EDS19_10	2019-07-07 13:49:46	37.13	23.47	48.3503	-12.1426	37.538	Mozambique	588.879	2.48398	14.5584	0.352196	85.9715	0.651305	14.255	0.0135482	1321.91	3.65051	139.5	0.208334	0.857772	1.00456	1.94698	0.471621	29.3519	3.734	500	7.73	18	2.75		8.34302	8.4635	7.70617	8.3245	45.02	44.1725	40.91	43.9717	0.34	0.7175	0.4	0.562976	0.0128031	2018	1	1088.42	875.12	1245.85
NIA_EDS19_112D	NIA_EDS19_10	2019-07-07 13:50:24	36.41	23.57	46.4271	-12.1426	37.538	Mozambique	602.014	2.35931	12.6333	0.355204	99.1063	0.526637	12.3299	0.0165555	1385.94	2.68458	109.739	0.231535	0.889354	1.00456	1.94698	0.471621	29.3519	3.734	500	7.73	18	2.75		8.34302	8.4635	7.70617	8.3245	45.02	44.1725	40.91	43.9717	0.34	0.7175	0.4	0.562976	0.0128031	2018	1	1088.42	875.12	1245.85
NIA_EDS19_113A	NIA_EDS19_10	2019-07-07 13:56:14	35.77	22.67	45.3541	-12.1429	37.5387	Mozambique	566.253	2.06932	6.6087	0.415862	63.3446	0.236646	6.30531	0.0772142	1428.73	1.94563	90.5117	1.74168	0.909471	1.00456	1.94698	0.471621	29.3519	3.734	500	7.73	18	2.75		8.34302	8.4635	7.70617	8.3245	45.02	44.1725	40.91	43.9717	0.34	0.7175	0.4	0.562976	0.0128031	2018	1	1088.42	875.12	1245.85
NIA_EDS19_113B	NIA_EDS19_10	2019-07-07 13:57:09	35.39	22.44	44.5475	-12.1429	37.539	Mozambique	538.479	1.99313	4.75383	0.414778	35.5712	0.160453	4.45044	0.0761294	1389.33	2.28441	110.628	2.97364	0.888799	1.00456	1.94698	0.471621	29.3519	3.734	500	7.73	18	2.75		8.34302	8.4635	7.70617	8.3245	45.02	44.1725	40.91	43.9717	0.34	0.7175	0.4	0.562976	0.0128031	2018	1	1088.42	875.12	1245.85
NIA_LDS19_cal1	NIA_LDS19_1	calibration						Mozambique	4706	15.0995	100.283	1.16947	4234.37	13.2804	100.02	0.807638	1584.82	1.81186	23.8252	0.3023	0.976924
NIA_LDS19_1A	NIA_LDS19_1	2019-10-07 13:55:35	39.89	23.37	56.1747	-12.1346	37.432	Mozambique	522.837	1.98482	4.94188	0.377801	51.2089	0.165739	4.67941	0.0159669	1552.89	1.83207	90.3119	0.484226	0.916272	1.15815	3.38997	0.764565	24.0976	5.96117	590	8.01	13.98	2.67	63.9642	19.3768	8.0935	8.56303	10.8784	44.6775	47.96	48.4325	47.3124	0.32	0.73	0.43	0.597447	0.0126277	2017	2	1075.36	99.02	1258.94
NIA_LDS19_1B	NIA_LDS19_1	2019-10-07 13:56:13	38.34	23.1	51.8756	-12.1346	37.4321	Mozambique	688.743	2.92264	28.7562	0.392802	217.115	1.10356	28.4937	0.0309683	1482.86	2.74744	123.856	0.211523	0.883987	1.15815	3.38997	0.764565	24.0976	5.96117	590	8.01	13.98	2.67	63.9642	19.3768	8.0935	8.56303	10.8784	44.6775	47.96	48.4325	47.3124	0.32	0.73	0.43	0.597447	0.0126277	2017	2	1075.36	99.02	1258.94
NIA_LDS19_2B	NIA_LDS19_1	2019-10-07 13:55:00	41.56	26.39	58.9563	-12.1346	37.432	Mozambique	492.955	1.84896	0.297268	0.371904	21.3264	0.0298731	0.0348039	0.01007	1719.67	0.878067	1.78613	0.812057	0.998371	1.15815	3.38997	0.764565	24.0976	5.96117	590	8.01	13.98	2.67	63.9642	19.3768	8.0935	8.56303	10.8784	44.6775	47.96	48.4325	47.3124	0.32	0.73	0.43	0.597447	0.0126277	2017	2	1075.36	99.02	1258.94
NIA_LDS19_2C	NIA_LDS19_1	2019-10-07 13:55:38	39.65	23.3	55.5102	-12.1346	37.432	Mozambique	493.973	1.84618	0.279485	0.355327	22.3445	0.0270947	0.0170205	-0.00650663	1722.77	0.761486	0.835194	-0.5017	0.999239	1.15815	3.38997	0.764565	24.0976	5.96117	590	8.01	13.98	2.67	63.9642	19.3768	8.0935	8.56303	10.8784	44.6775	47.96	48.4325	47.3124	0.32	0.73	0.43	0.597447	0.0126277	2017	2	1075.36	99.02	1258.94
NIA_LDS19_3A	NIA_LDS19_1	2019-10-07 13:56:26	37.88	23.17	50.5561	-12.1344	37.4321	Mozambique	716.157	3.81262	40.4676	0.3812	244.529	1.99354	40.2051	0.0193666	1421.13	4.22326	148.71	0.11256	0.858798	1.15815	3.38997	0.764565	24.0976	5.96117	590	8.01	13.98	2.67	63.9642	19.3768	8.0935	8.56303	10.8784	44.6775	47.96	48.4325	47.3124	0.32	0.73	0.43	0.597447	0.0126277	2017	2	1075.36	99.02	1258.94
NIA_LDS19_3B	NIA_LDS19_1	2019-10-07 13:57:03	36.55	23.48	46.8389	-12.1344	37.432	Mozambique	1119.56	6.17079	80.1537	0.516214	647.935	4.3517	79.8912	0.15438	1484.76	3.635	116.515	0.35379	0.890233	1.15815	3.38997	0.764565	24.0976	5.96117	590	8.01	13.98	2.67	63.9642	19.3768	8.0935	8.56303	10.8784	44.6775	47.96	48.4325	47.3124	0.32	0.73	0.43	0.597447	0.0126277	2017	2	1075.36	99.02	1258.94
NIA_LDS19_3C	NIA_LDS19_1	2019-10-07 14:00:07	37.13	26.73	46.2907	-12.1345	37.4319	Mozambique	946.493	5.2664	58.3223	0.501519	474.865	3.44732	58.0598	0.139685	1483.12	3.92471	115.409	0.4363	0.891054	1.15815	3.38997	0.764565	24.0976	5.96117	590	8.01	13.98	2.67	63.9642	19.3768	8.0935	8.56303	10.8784	44.6775	47.96	48.4325	47.3124	0.32	0.73	0.43	0.597447	0.0126277	2017	2	1075.36	99.02	1258.94
NIA_LDS19_3D	NIA_LDS19_1	2019-10-07 14:00:46	37.13	26.84	46.2212	-12.1347	37.4319	Mozambique	1023.68	6.63401	79.2083	0.396323	552.055	4.81493	78.9458	0.0344897	1446.38	4.59845	131.64	0.0903689	0.874888	1.15815	3.38997	0.764565	24.0976	5.96117	590	8.01	13.98	2.67	63.9642	19.3768	8.0935	8.56303	10.8784	44.6775	47.96	48.4325	47.3124	0.32	0.73	0.43	0.597447	0.0126277	2017	2	1075.36	99.02	1258.94
NIA_LDS19_4A	NIA_LDS19_1	2019-10-07 14:01:24	38.07	27.03	48.5121	-12.1348	37.4319	Mozambique	1005.06	3.33221	37.9751	0.398907	533.433	1.51312	37.7126	0.037073	1588.24	1.64222	71.4629	0.110389	0.93397	1.15815	3.38997	0.764565	24.0976	5.96117	590	8.01	13.98	2.67	63.9642	19.3768	8.0935	8.56303	10.8784	44.6775	47.96	48.4325	47.3124	0.32	0.73	0.43	0.597447	0.0126277	2017	2	1075.36	99.02	1258.94
NIA_LDS19_4B	NIA_LDS19_1	2019-10-07 14:02:00	38.19	27.24	48.6871	-12.1348	37.4319	Mozambique	947.144	3.15415	32.3653	0.395914	475.515	1.33506	32.1028	0.0340807	1593.61	1.63095	68.473	0.114224	0.936758	1.15815	3.38997	0.764565	24.0976	5.96117	590	8.01	13.98	2.67	63.9642	19.3768	8.0935	8.56303	10.8784	44.6775	47.96	48.4325	47.3124	0.32	0.73	0.43	0.597447	0.0126277	2017	2	1075.36	99.02	1258.94
NIA_LDS19_4C	NIA_LDS19_1	2019-10-07 14:05:30	38.36	27.83	48.7373	-12.1346	37.4319	Mozambique	1321.35	4.38363	59.406	0.415669	849.72	2.56455	59.1436	0.0538353	1588.83	1.74796	70.3826	0.100669	0.934926	1.15815	3.38997	0.764565	24.0976	5.96117	590	8.01	13.98	2.67	63.9642	19.3768	8.0935	8.56303	10.8784	44.6775	47.96	48.4325	47.3124	0.32	0.73	0.43	0.597447	0.0126277	2017	2	1075.36	99.02	1258.94
NIA_LDS19_4D	NIA_LDS19_1	2019-10-07 14:06:07	38.85	27.82	50.047	-12.1347	37.4319	Mozambique	1758.1	6.93965	106.101	0.455759	1286.47	5.12057	105.839	0.0939252	1562.42	2.26691	81.8083	0.11408	0.923984	1.15815	3.38997	0.764565	24.0976	5.96117	590	8.01	13.98	2.67	63.9642	19.3768	8.0935	8.56303	10.8784	44.6775	47.96	48.4325	47.3124	0.32	0.73	0.43	0.597447	0.0126277	2017	2	1075.36	99.02	1258.94
NIA_LDS19_5A	NIA_LDS19_1	2019-10-07 14:06:46	40.45	27.72	54.589	-12.1347	37.4319	Mozambique	710.366	2.52139	16.7794	0.384769	238.737	0.702302	16.5169	0.0229351	1590.01	1.705	70.0108	0.15276	0.935292	1.15815	3.38997	0.764565	24.0976	5.96117	590	8.01	13.98	2.67	63.9642	19.3768	8.0935	8.56303	10.8784	44.6775	47.96	48.4325	47.3124	0.32	0.73	0.43	0.597447	0.0126277	2017	2	1075.36	99.02	1258.94
NIA_LDS19_5B	NIA_LDS19_1	2019-10-07 14:07:23	41.2	27.86	56.6917	-12.1347	37.4318	Mozambique	2146.9	3.91241	56.5335	0.436882	1675.27	2.09333	56.271	0.0750481	1662.08	0.75705	35.5311	0.0744623	0.967502	1.15815	3.38997	0.764565	24.0976	5.96117	590	8.01	13.98	2.67	63.9642	19.3768	8.0935	8.56303	10.8784	44.6775	47.96	48.4325	47.3124	0.32	0.73	0.43	0.597447	0.0126277	2017	2	1075.36	99.02	1258.94
NIA_LDS19_5C	NIA_LDS19_1	2019-10-07 14:09:49	42.59	27.38	61.3954	-12.1346	37.432	Mozambique	1585.39	5.72954	86.1909	0.424975	1113.76	3.91046	85.9284	0.0631408	1573.5	2.01383	77.2624	0.08921	0.928374	1.15815	3.38997	0.764565	24.0976	5.96117	590	8.01	13.98	2.67	63.9642	19.3768	8.0935	8.56303	10.8784	44.6775	47.96	48.4325	47.3124	0.32	0.73	0.43	0.597447	0.0126277	2017	2	1075.36	99.02	1258.94
NIA_LDS19_5D	NIA_LDS19_1	2019-10-07 14:10:28	42.2	27.35	60.1787	-12.1346	37.432	Mozambique	2762.64	5.73441	108.073	0.498735	2291.01	3.91533	107.811	0.136901	1635.31	1.01873	48.9768	0.0977255	0.955057	1.15815	3.38997	0.764565	24.0976	5.96117	590	8.01	13.98	2.67	63.9642	19.3768	8.0935	8.56303	10.8784	44.6775	47.96	48.4325	47.3124	0.32	0.73	0.43	0.597447	0.0126277	2017	2	1075.36	99.02	1258.94
NIA_LDS19_6A	NIA_LDS19_1	2019-10-07 14:11:51	41.31	27.07	57.6464	-12.1347	37.4319	Mozambique	1753.63	5.90547	58.9084	0.42318	1282	4.08639	58.6459	0.0613463	1627.34	1.89082	47.3789	0.0778767	0.956256	1.15815	3.38997	0.764565	24.0976	5.96117	590	8.01	13.98	2.67	63.9642	19.3768	8.0935	8.56303	10.8784	44.6775	47.96	48.4325	47.3124	0.32	0.73	0.43	0.597447	0.0126277	2017	2	1075.36	99.02	1258.94
NIA_LDS19_6B	NIA_LDS19_1	2019-10-07 14:12:29	41.61	26.93	58.6781	-12.1348	37.4318	Mozambique	1943.82	6.79911	102.645	0.444179	1472.2	4.98002	102.383	0.0823453	1586.54	1.95631	70.2211	0.0887468	0.934978	1.15815	3.38997	0.764565	24.0976	5.96117	590	8.01	13.98	2.67	63.9642	19.3768	8.0935	8.56303	10.8784	44.6775	47.96	48.4325	47.3124	0.32	0.73	0.43	0.597447	0.0126277	2017	2	1075.36	99.02	1258.94
NIA_LDS19_6C	NIA_LDS19_1	2019-10-07 14:13:07	44.93	27.1	69.5871	-12.1348	37.4318	Mozambique	985.178	3.48794	37.3337	0.400187	513.55	1.66886	37.0712	0.0383534	1583.14	1.87533	72.7329	0.118241	0.932674	1.15815	3.38997	0.764565	24.0976	5.96117	590	8.01	13.98	2.67	63.9642	19.3768	8.0935	8.56303	10.8784	44.6775	47.96	48.4325	47.3124	0.32	0.73	0.43	0.597447	0.0126277	2017	2	1075.36	99.02	1258.94
NIA_LDS19_7B	NIA_LDS19_1	2019-10-07 14:18:27	47.93	23.95	84.5719	-12.1349	37.4318	Mozambique	602.118	2.38015	12.588	0.379295	130.49	0.561064	12.3255	0.0174614	1541.55	2.4161	92.6713	0.206296	0.913696	1.15815	3.38997	0.764565	24.0976	5.96117	590	8.01	13.98	2.67	63.9642	19.3768	8.0935	8.56303	10.8784	44.6775	47.96	48.4325	47.3124	0.32	0.73	0.43	0.597447	0.0126277	2017	2	1075.36	99.02	1258.94
NIA_LDS19_7C	NIA_LDS19_1	2019-10-07 14:20:07	46.97	24.87	79.5918	-12.1349	37.4318	Mozambique	2040.16	9.03461	140.698	0.453027	1568.53	7.21553	140.436	0.0911934	1547.24	2.5945	88.1655	0.0899616	0.917824	1.15815	3.38997	0.764565	24.0976	5.96117	590	8.01	13.98	2.67	63.9642	19.3768	8.0935	8.56303	10.8784	44.6775	47.96	48.4325	47.3124	0.32	0.73	0.43	0.597447	0.0126277	2017	2	1075.36	99.02	1258.94
NIA_LDS19_7D	NIA_LDS19_1	2019-10-07 14:20:45	47.82	25.03	82.91	-12.1349	37.4318	Mozambique	1475.17	5.60703	69.208	0.415604	1003.54	3.78795	68.9455	0.0537706	1585.34	2.18128	69.3188	0.0849498	0.935714	1.15815	3.38997	0.764565	24.0976	5.96117	590	8.01	13.98	2.67	63.9642	19.3768	8.0935	8.56303	10.8784	44.6775	47.96	48.4325	47.3124	0.32	0.73	0.43	0.597447	0.0126277	2017	2	1075.36	99.02	1258.94
NIA_LDS19_8A	NIA_LDS19_1	2019-10-07 14:24:05	45.36	24.18	73.9908	-12.1348	37.4318	Mozambique	1286.41	7.33019	32.4055	0.383335	814.782	5.51111	32.143	0.0215014	1613.59	3.97843	40.5131	0.0425841	0.962047	1.15815	3.38997	0.764565	24.0976	5.96117	590	8.01	13.98	2.67	63.9642	19.3768	8.0935	8.56303	10.8784	44.6775	47.96	48.4325	47.3124	0.32	0.73	0.43	0.597447	0.0126277	2017	2	1075.36	99.02	1258.94
NIA_LDS19_8B	NIA_LDS19_1	2019-10-07 14:24:44	44.68	24.29	71.345	-12.1348	37.4317	Mozambique	1138.99	5.34184	66.3078	0.403692	667.364	3.52275	66.0453	0.041858	1528.74	2.94152	96.2873	0.095891	0.909948	1.15815	3.38997	0.764565	24.0976	5.96117	590	8.01	13.98	2.67	63.9642	19.3768	8.0935	8.56303	10.8784	44.6775	47.96	48.4325	47.3124	0.32	0.73	0.43	0.597447	0.0126277	2017	2	1075.36	99.02	1258.94
NIA_LDS19_8C	NIA_LDS19_1	2019-10-07 14:25:33	43.48	24.1	67.2167	-12.1351	37.4317	Mozambique	1724.46	8.24581	113.279	0.43357	1252.83	6.42673	113.017	0.0717366	1542.92	2.8851	88.5832	0.088353	0.917255	1.15815	3.38997	0.764565	24.0976	5.96117	590	8.01	13.98	2.67	63.9642	19.3768	8.0935	8.56303	10.8784	44.6775	47.96	48.4325	47.3124	0.32	0.73	0.43	0.597447	0.0126277	2017	2	1075.36	99.02	1258.94
NIA_LDS19_8D	NIA_LDS19_1	2019-10-07 14:26:10	50.25	24.38	94.4292	-12.1352	37.4317	Mozambique	1375.59	5.26398	65.0372	0.41401	903.966	3.44489	64.7747	0.0521764	1580.35	2.19532	72.0715	0.0912229	0.933135	1.15815	3.38997	0.764565	24.0976	5.96117	590	8.01	13.98	2.67	63.9642	19.3768	8.0935	8.56303	10.8784	44.6775	47.96	48.4325	47.3124	0.32	0.73	0.43	0.597447	0.0126277	2017	2	1075.36	99.02	1258.94
NIA_LDS19_9A	NIA_LDS19_1	2019-10-07 14:31:09	43.56	24.38	67.2477	-12.1351	37.4317	Mozambique	1093.65	6.63397	89.1578	0.409669	622.022	4.81489	88.8953	0.047835	1451.85	4.0966	132.054	0.111658	0.874957	1.15815	3.38997	0.764565	24.0976	5.96117	590	8.01	13.98	2.67	63.9642	19.3768	8.0935	8.56303	10.8784	44.6775	47.96	48.4325	47.3124	0.32	0.73	0.43	0.597447	0.0126277	2017	2	1075.36	99.02	1258.94
NIA_LDS19_9B	NIA_LDS19_1	2019-10-07 14:31:47	46.94	24.34	80.0314	-12.1351	37.4317	Mozambique	3463.12	13.6791	316.705	0.569725	2991.49	11.86	316.442	0.207891	1526.47	2.20601	102.767	0.106088	0.904338	1.15815	3.38997	0.764565	24.0976	5.96117	590	8.01	13.98	2.67	63.9642	19.3768	8.0935	8.56303	10.8784	44.6775	47.96	48.4325	47.3124	0.32	0.73	0.43	0.597447	0.0126277	2017	2	1075.36	99.02	1258.94
NIA_LDS19_9C	NIA_LDS19_1	2019-10-07 14:32:24	48.19	24.28	85.3139	-12.1352	37.4316	Mozambique	847.498	5.21752	59.3963	0.389874	375.87	3.39844	59.1338	0.0280397	1425.69	4.69881	142.752	0.106363	0.864061	1.15815	3.38997	0.764565	24.0976	5.96117	590	8.01	13.98	2.67	63.9642	19.3768	8.0935	8.56303	10.8784	44.6775	47.96	48.4325	47.3124	0.32	0.73	0.43	0.597447	0.0126277	2017	2	1075.36	99.02	1258.94
NIA_LDS19_10A	NIA_LDS19_1	2019-10-07 14:38:04	45.88	22.9	77.2699	-12.1355	37.4318	Mozambique	2012.77	6.10689	97.2464	0.47392	1541.14	4.28781	96.984	0.112086	1601.3	1.624	64.1338	0.116469	0.940796	1.15815	3.38997	0.764565	24.0976	5.96117	590	8.01	13.98	2.67	63.9642	19.3768	8.0935	8.56303	10.8784	44.6775	47.96	48.4325	47.3124	0.32	0.73	0.43	0.597447	0.0126277	2017	2	1075.36	99.02	1258.94
NIA_LDS19_10B	NIA_LDS19_1	2019-10-07 14:38:43	51.04	23.22	99.6955	-12.1356	37.4319	Mozambique	1676.78	8.14837	125.026	0.441973	1205.15	6.32928	124.764	0.080139	1522.08	2.91387	100.286	0.101221	0.906186	1.15815	3.38997	0.764565	24.0976	5.96117	590	8.01	13.98	2.67	63.9642	19.3768	8.0935	8.56303	10.8784	44.6775	47.96	48.4325	47.3124	0.32	0.73	0.43	0.597447	0.0126277	2017	2	1075.36	99.02	1258.94
NIA_LDS19_10C	NIA_LDS19_1	2019-10-07 14:39:20	54.53	22.33	119.535	-12.1356	37.4318	Mozambique	676.11	2.86214	22.1034	0.381463	204.482	1.04306	21.8409	0.0196292	1518.1	2.82276	103.199	0.14574	0.903496	1.15815	3.38997	0.764565	24.0976	5.96117	590	8.01	13.98	2.67	63.9642	19.3768	8.0935	8.56303	10.8784	44.6775	47.96	48.4325	47.3124	0.32	0.73	0.43	0.597447	0.0126277	2017	2	1075.36	99.02	1258.94
NIA_LDS19_10D	NIA_LDS19_1	2019-10-07 14:43:57	47.62	20.43	87.1138	-12.1354	37.4318	Mozambique	902.633	3.64439	35.0564	0.395124	431.005	1.82531	34.7939	0.0332904	1563.22	2.41321	80.3155	0.12075	0.925303	1.15815	3.38997	0.764565	24.0976	5.96117	590	8.01	13.98	2.67	63.9642	19.3768	8.0935	8.56303	10.8784	44.6775	47.96	48.4325	47.3124	0.32	0.73	0.43	0.597447	0.0126277	2017	2	1075.36	99.02	1258.94
NIA_LDS19_11A	NIA_LDS19_1	2019-10-07 14:44:34	51.9	21.06	106.925	-12.1355	37.4318	Mozambique	771.958	1.8901	42.0981	0.386855	300.33	0.0710155	41.8356	0.0250214	1499.31	0.129231	132.922	0.124921	0.877733	1.15815	3.38997	0.764565	24.0976	5.96117	590	8.01	13.98	2.67	63.9642	19.3768	8.0935	8.56303	10.8784	44.6775	47.96	48.4325	47.3124	0.32	0.73	0.43	0.597447	0.0126277	2017	2	1075.36	99.02	1258.94
NIA_LDS19_11B	NIA_LDS19_1	2019-10-07 14:45:11	56.49	20.57	134.25	-12.1355	37.4318	Mozambique	864.253	6.05857	60.4036	0.396855	392.624	4.23949	60.1411	0.0350213	1421.85	5.59643	138.614	0.126835	0.867169	1.15815	3.38997	0.764565	24.0976	5.96117	590	8.01	13.98	2.67	63.9642	19.3768	8.0935	8.56303	10.8784	44.6775	47.96	48.4325	47.3124	0.32	0.73	0.43	0.597447	0.0126277	2017	2	1075.36	99.02	1258.94
NIA_LDS19_11C	NIA_LDS19_1	2019-10-07 14:45:54	53.19	20.95	114.028	-12.1356	37.4317	Mozambique	811.431	3.89351	37.2168	0.392814	339.803	2.07442	36.9544	0.0309803	1509.27	3.35861	104.463	0.137612	0.901915	1.15815	3.38997	0.764565	24.0976	5.96117	590	8.01	13.98	2.67	63.9642	19.3768	8.0935	8.56303	10.8784	44.6775	47.96	48.4325	47.3124	0.32	0.73	0.43	0.597447	0.0126277	2017	2	1075.36	99.02	1258.94
NIA_LDS19_11D	NIA_LDS19_1	2019-10-07 14:51:06	48.45	20.28	91.0015	-12.1355	37.4316	Mozambique	1217.59	5.42185	67.3282	0.411509	745.963	3.60276	67.0658	0.0496752	1545.24	2.72042	88.4175	0.102908	0.917511	1.15815	3.38997	0.764565	24.0976	5.96117	590	8.01	13.98	2.67	63.9642	19.3768	8.0935	8.56303	10.8784	44.6775	47.96	48.4325	47.3124	0.32	0.73	0.43	0.597447	0.0126277	2017	2	1075.36	99.02	1258.94
NIA_LDS19_12A	NIA_LDS19_1	2019-10-07 14:51:43	50.16	19.26	100.374	-12.1356	37.4316	Mozambique	753.911	3.38575	28.6145	0.384711	282.283	1.56666	28.3521	0.0228774	1524.89	3.08495	97.4752	0.123592	0.908729	1.15815	3.38997	0.764565	24.0976	5.96117	590	8.01	13.98	2.67	63.9642	19.3768	8.0935	8.56303	10.8784	44.6775	47.96	48.4325	47.3124	0.32	0.73	0.43	0.597447	0.0126277	2017	2	1075.36	99.02	1258.94
NIA_LDS19_12B	NIA_LDS19_1	2019-10-07 14:52:20	49.68	19.45	97.7781	-12.1357	37.4316	Mozambique	862.913	3.31569	30.5892	0.389982	391.284	1.4966	30.3267	0.0281479	1570.92	2.19023	77.4898	0.113015	0.92807	1.15815	3.38997	0.764565	24.0976	5.96117	590	8.01	13.98	2.67	63.9642	19.3768	8.0935	8.56303	10.8784	44.6775	47.96	48.4325	47.3124	0.32	0.73	0.43	0.597447	0.0126277	2017	2	1075.36	99.02	1258.94
NIA_LDS19_12C	NIA_LDS19_1	2019-10-07 14:52:57	51.78	20	0	-12.1358	37.4316	Mozambique	1560.45	6.43891	89.4894	0.416715	1088.82	4.61983	89.2269	0.0548807	1561.26	2.4147	81.4275	0.0786986	0.924259	1.15815	3.38997	0.764565	24.0976	5.96117	590	8.01	13.98	2.67	63.9642	19.3768	8.0935	8.56303	10.8784	44.6775	47.96	48.4325	47.3124	0.32	0.73	0.43	0.597447	0.0126277	2017	2	1075.36	99.02	1258.94
NIA_LDS19_12D	NIA_LDS19_1	2019-10-07 15:06:54	42.93	18.09	70.4907	-12.1358	37.4315	Mozambique	687.728	2.96169	22.533	0.379613	216.1	1.14261	22.2705	0.017779	1522.56	2.93453	99.8637	0.125273	0.906572	1.15815	3.38997	0.764565	24.0976	5.96117	590	8.01	13.98	2.67	63.9642	19.3768	8.0935	8.56303	10.8784	44.6775	47.96	48.4325	47.3124	0.32	0.73	0.43	0.597447	0.0126277	2017	2	1075.36	99.02	1258.94
NIA_LDS19_13A	NIA_LDS19_1	2019-10-07 15:07:31	44.09	18.58	74.423	-12.1358	37.4315	Mozambique	1131.59	9.0473	114.237	0.399934	659.957	7.22821	113.975	0.0380998	1396.14	5.57399	153.455	0.080606	0.852733	1.15815	3.38997	0.764565	24.0976	5.96117	590	8.01	13.98	2.67	63.9642	19.3768	8.0935	8.56303	10.8784	44.6775	47.96	48.4325	47.3124	0.32	0.73	0.43	0.597447	0.0126277	2017	2	1075.36	99.02	1258.94
NIA_LDS19_13B	NIA_LDS19_1	2019-10-07 15:08:08	45.36	18.82	79.2215	-12.1358	37.4315	Mozambique	786	2.80603	8.63091	0.379147	314.372	0.986946	8.36845	0.0173127	1660.91	1.90071	28.1387	0.0914737	0.974071	1.15815	3.38997	0.764565	24.0976	5.96117	590	8.01	13.98	2.67	63.9642	19.3768	8.0935	8.56303	10.8784	44.6775	47.96	48.4325	47.3124	0.32	0.73	0.43	0.597447	0.0126277	2017	2	1075.36	99.02	1258.94
NIA_LDS19_13C	NIA_LDS19_1	2019-10-07 15:08:45	46.55	19.27	83.7194	-12.1357	37.4314	Mozambique	1039.7	4.28136	49.099	0.403656	568.072	2.46228	48.8365	0.0418223	1554.41	2.45595	85.048	0.114446	0.920837	1.15815	3.38997	0.764565	24.0976	5.96117	590	8.01	13.98	2.67	63.9642	19.3768	8.0935	8.56303	10.8784	44.6775	47.96	48.4325	47.3124	0.32	0.73	0.43	0.597447	0.0126277	2017	2	1075.36	99.02	1258.94
NIA_LDS19_13D	NIA_LDS19_1	2019-10-07 15:12:26	47.05	19.67	85.4464	-12.1359	37.4318	Mozambique	1042.7	5.97875	73.2229	0.39449	571.075	4.15967	72.9604	0.0326558	1475.25	3.917	119.955	0.0843651	0.886714	1.15815	3.38997	0.764565	24.0976	5.96117	590	8.01	13.98	2.67	63.9642	19.3768	8.0935	8.56303	10.8784	44.6775	47.96	48.4325	47.3124	0.32	0.73	0.43	0.597447	0.0126277	2017	2	1075.36	99.02	1258.94
NIA_LDS19_14A	NIA_LDS19_1	2019-10-07 15:13:42	49.36	19.98	95.5987	-12.136	37.4318	Mozambique	542.146	1.86847	26.7643	0.381571	70.5175	0.0493855	26.5018	0.0197369	1219.21	0.311243	291.617	0.341263	0.72684	1.15815	3.38997	0.764565	24.0976	5.96117	590	8.01	13.98	2.67	63.9642	19.3768	8.0935	8.56303	10.8784	44.6775	47.96	48.4325	47.3124	0.32	0.73	0.43	0.597447	0.0126277	2017	2	1075.36	99.02	1258.94
NIA_LDS19_14B	NIA_LDS19_1	2019-10-07 15:14:19	48.31	19.83	90.8741	-12.1359	37.4317	Mozambique	1264.05	4.20464	53.9759	0.406407	792.422	2.38556	53.7134	0.0445736	1591.84	1.74684	68.6723	0.0895467	0.936519	1.15815	3.38997	0.764565	24.0976	5.96117	590	8.01	13.98	2.67	63.9642	19.3768	8.0935	8.56303	10.8784	44.6775	47.96	48.4325	47.3124	0.32	0.73	0.43	0.597447	0.0126277	2017	2	1075.36	99.02	1258.94
NIA_LDS19_14C	NIA_LDS19_1	2019-10-07 15:14:57	48.63	19.37	92.875	-12.1359	37.4317	Mozambique	1283.32	4.62694	58.2823	0.418836	811.691	2.80786	58.0198	0.0570024	1582.91	1.99601	72.0112	0.11117	0.933288	1.15815	3.38997	0.764565	24.0976	5.96117	590	8.01	13.98	2.67	63.9642	19.3768	8.0935	8.56303	10.8784	44.6775	47.96	48.4325	47.3124	0.32	0.73	0.43	0.597447	0.0126277	2017	2	1075.36	99.02	1258.94
NIA_LDS19_14D	NIA_LDS19_1	2019-10-07 15:19:02	45.97	19.43	81.1197	-12.136	37.4316	Mozambique	1334.61	6.43207	86.2205	0.418591	862.982	4.61299	85.958	0.0567567	1527.37	2.97608	96.8246	0.100459	0.909417	1.15815	3.38997	0.764565	24.0976	5.96117	590	8.01	13.98	2.67	63.9642	19.3768	8.0935	8.56303	10.8784	44.6775	47.96	48.4325	47.3124	0.32	0.73	0.43	0.597447	0.0126277	2017	2	1075.36	99.02	1258.94
NIA_LDS19_15B	NIA_LDS19_1	2019-10-07 15:20:15	51.87	18.87	109.73	-12.1361	37.4317	Mozambique	867.685	3.25442	31.5441	0.397596	396.056	1.43534	31.2816	0.0357624	1569.87	2.07386	78.9137	0.141763	0.926799	1.15815	3.38997	0.764565	24.0976	5.96117	590	8.01	13.98	2.67	63.9642	19.3768	8.0935	8.56303	10.8784	44.6775	47.96	48.4325	47.3124	0.32	0.73	0.43	0.597447	0.0126277	2017	2	1075.36	99.02	1258.94
NIA_LDS19_15C	NIA_LDS19_1	2019-10-07 15:20:55	51.74	19.01	108.845	-12.1361	37.4317	Mozambique	621.803	2.63309	17.6666	0.377213	150.174	0.814004	17.4042	0.0153796	1502.89	2.96947	110.852	0.153924	0.896143	1.15815	3.38997	0.764565	24.0976	5.96117	590	8.01	13.98	2.67	63.9642	19.3768	8.0935	8.56303	10.8784	44.6775	47.96	48.4325	47.3124	0.32	0.73	0.43	0.597447	0.0126277	2017	2	1075.36	99.02	1258.94
NIA_LDS19_15D	NIA_LDS19_1	2019-10-07 15:24:48	49.27	18.14	97.3588	-12.1359	37.4314	Mozambique	699.867	2.86554	23.3628	0.382063	228.239	1.04646	23.1003	0.0202293	1529.57	2.55637	98.527	0.135578	0.908091	1.15815	3.38997	0.764565	24.0976	5.96117	590	8.01	13.98	2.67	63.9642	19.3768	8.0935	8.56303	10.8784	44.6775	47.96	48.4325	47.3124	0.32	0.73	0.43	0.597447	0.0126277	2017	2	1075.36	99.02	1258.94
NIA_LDS19_16B	NIA_LDS19_1	2019-10-07 15:33:00	45.36	14.25	83.6813	-12.1363	37.4312	Mozambique	940.293	3.68036	37.711	0.39568	468.664	1.86127	37.4485	0.0338463	1566.19	2.26733	79.6481	0.113116	0.926008	1.15815	3.38997	0.764565	24.0976	5.96117	590	8.01	13.98	2.67	63.9642	19.3768	8.0935	8.56303	10.8784	44.6775	47.96	48.4325	47.3124	0.32	0.73	0.43	0.597447	0.0126277	2017	2	1075.36	99.02	1258.94
NIA_LDS19_16C	NIA_LDS19_1	2019-10-07 15:33:49	48.98	14.66	100.038	-12.1361	37.4312	Mozambique	893.392	4.03702	43.8135	0.395927	421.763	2.21794	43.551	0.0340928	1522.43	2.91836	100.052	0.123072	0.906405	1.15815	3.38997	0.764565	24.0976	5.96117	590	8.01	13.98	2.67	63.9642	19.3768	8.0935	8.56303	10.8784	44.6775	47.96	48.4325	47.3124	0.32	0.73	0.43	0.597447	0.0126277	2017	2	1075.36	99.02	1258.94
NIA_LDS19_16D	NIA_LDS19_1	2019-10-07 15:34:37	45.23	14.92	82.4754	-12.1364	37.4312	Mozambique	598.317	2.36291	11.8063	0.376888	126.688	0.543822	11.5438	0.0150542	1546.71	2.42019	89.6975	0.183806	0.916489	1.15815	3.38997	0.764565	24.0976	5.96117	590	8.01	13.98	2.67	63.9642	19.3768	8.0935	8.56303	10.8784	44.6775	47.96	48.4325	47.3124	0.32	0.73	0.43	0.597447	0.0126277	2017	2	1075.36	99.02	1258.94
NIA_LDS19_cal2	NIA_LDS19_1	calibration						Mozambique	4710.27	14.9694	102.373	1.13523	4238.64	13.1503	102.111	0.773397	1665.67	1.88373	25.5383	0.303944	0.976476	1.15815	3.38997	0.764565	24.0976	5.96117	590	8.01	13.98	2.67	63.9642	19.3768	8.0935	8.56303	10.8784	44.6775	47.96	48.4325	47.3124	0.32	0.73	0.43	0.597447	0.0126277
NIA_LDS19_17A	NIA_LDS19_1	2019-10-07 15:39:05	41.79	16.92	67.3518	-12.1363	37.4312	Mozambique	2017.45	9.46021	178.005	0.443146	1545.82	7.64113	177.743	0.0813122	1507.02	2.71543	110.283	0.0792767	0.896875	1.15815	3.38997	0.764565	24.0976	5.96117	590	8.01	13.98	2.67	63.9642	19.3768	8.0935	8.56303	10.8784	44.6775	47.96	48.4325	47.3124	0.32	0.73	0.43	0.597447	0.0126277	2017	2	1075.36	99.02	1258.94
NIA_LDS19_17B	NIA_LDS19_1	2019-10-07 15:40:51	40.95	17.75	63.7878	-12.1366	37.431	Mozambique	987.482	6.4561	92.1878	0.384161	515.853	4.63702	91.9253	0.0223269	1399.19	4.58471	158.688	0.0605633	0.848752	1.15815	3.38997	0.764565	24.0976	5.96117	590	8.01	13.98	2.67	63.9642	19.3768	8.0935	8.56303	10.8784	44.6775	47.96	48.4325	47.3124	0.32	0.73	0.43	0.597447	0.0126277	2017	2	1075.36	99.02	1258.94
NIA_LDS19_17C	NIA_LDS19_1	2019-10-07 15:41:32	41.2	17.83	64.5738	-12.1366	37.431	Mozambique	1334.64	5.28567	79.1449	0.397045	863.01	3.46659	78.8824	0.0352114	1547.99	2.2666	90.0511	0.0631632	0.916251	1.15815	3.38997	0.764565	24.0976	5.96117	590	8.01	13.98	2.67	63.9642	19.3768	8.0935	8.56303	10.8784	44.6775	47.96	48.4325	47.3124	0.32	0.73	0.43	0.597447	0.0126277	2017	2	1075.36	99.02	1258.94
NIA_LDS19_17D	NIA_LDS19_1	2019-10-07 15:42:09	40.62	17.74	62.6896	-12.1366	37.431	Mozambique	1545.49	7.52169	124.816	0.420275	1073.86	5.7026	124.554	0.0584416	1503.4	2.91018	110.979	0.0818235	0.896068	1.15815	3.38997	0.764565	24.0976	5.96117	590	8.01	13.98	2.67	63.9642	19.3768	8.0935	8.56303	10.8784	44.6775	47.96	48.4325	47.3124	0.32	0.73	0.43	0.597447	0.0126277	2017	2	1075.36	99.02	1258.94
NIA_LDS19_18B	NIA_LDS19_1	2019-10-07 15:50:48	40.45	20.95	59.702	-12.1364	37.4309	Mozambique	1037.63	3.77986	47.0613	0.380681	565.999	1.96077	46.7988	0.0188469	1565.04	1.97632	82.3573	0.0521169	0.923631	1.15815	3.38997	0.764565	24.0976	5.96117	590	8.01	13.98	2.67	63.9642	19.3768	8.0935	8.56303	10.8784	44.6775	47.96	48.4325	47.3124	0.32	0.73	0.43	0.597447	0.0126277	2017	2	1075.36	99.02	1258.94
NIA_LDS19_18C	NIA_LDS19_1	2019-10-07 15:51:28	43.88	20.91	71.5112	-12.1364	37.4309	Mozambique	1024.21	4.90305	64.4656	0.378988	552.58	3.08396	64.2031	0.0171542	1501.52	3.05468	111.032	0.0466161	0.895907	1.15815	3.38997	0.764565	24.0976	5.96117	590	8.01	13.98	2.67	63.9642	19.3768	8.0935	8.56303	10.8784	44.6775	47.96	48.4325	47.3124	0.32	0.73	0.43	0.597447	0.0126277	2017	2	1075.36	99.02	1258.94
NIA_LDS19_18D	NIA_LDS19_1	2019-10-07 15:52:05	44.66	20.8	74.5569	-12.1363	37.4309	Mozambique	658.094	3.66599	13.7963	0.424055	186.466	1.84691	13.5338	0.0622212	1540.39	5.56158	71.1559	0.514045	0.932331	1.15815	3.38997	0.764565	24.0976	5.96117	590	8.01	13.98	2.67	63.9642	19.3768	8.0935	8.56303	10.8784	44.6775	47.96	48.4325	47.3124	0.32	0.73	0.43	0.597447	0.0126277	2017	2	1075.36	99.02	1258.94
NIA_LDS19_cal3	NIA_LDS19_2	calibration						Mozambique	4801.6	15.3036	101.098	1.14879	4323.08	13.4477	100.566	0.804946	1585.61	1.79793	23.4752	0.295256	0.977266
NIA_LDS19_19A	NIA_LDS19_2	2019-10-08 13:55:30	39.08	27.88	50.6268	-12.1417	37.5017	Mozambique	1598.55	4.34516	69.1572	0.38999	1120.04	2.48931	68.6253	0.0461473	1478.91	1.19814	57.6701	0.0609375	0.942267	3.66347	0	0	98.1847	4.352	160	7.38	11.75	3.25	91.1405	14.2647			15.821	43.52	47.0173	47.9989	43.52	0.28	0.646667	0.477059	0.28	0.00643382	2017	2	1088.42	99.02	1258.94
NIA_LDS19_19B	NIA_LDS19_2	2019-10-08 13:56:07	44.39	29.14	65.783	-12.1417	37.5017	Mozambique	1870.35	4.61044	68.4991	0.391534	1391.83	2.75459	67.9672	0.0476912	1499.71	1.08192	46.6097	0.0513911	0.953441	3.66347	0	0	98.1847	4.352	160	7.38	11.75	3.25	91.1405	14.2647			15.821	43.52	47.0173	47.9989	43.52	0.28	0.646667	0.477059	0.28	0.00643382	2017	2	1088.42	99.02	1258.94
NIA_LDS19_19C	NIA_LDS19_2	2019-10-08 13:56:44	48.48	27.28	83.136	-12.1417	37.5016	Mozambique	2061.57	4.76528	73.4326	0.394054	1583.05	2.90943	72.9007	0.0502119	1505	1.00825	44.1092	0.0477393	0.955977	3.66347	0	0	98.1847	4.352	160	7.38	11.75	3.25	91.1405	14.2647			15.821	43.52	47.0173	47.9989	43.52	0.28	0.646667	0.477059	0.28	0.00643382	2017	2	1088.42	99.02	1258.94
NIA_LDS19_19D	NIA_LDS19_2	2019-10-08 13:57:21	48.36	26.86	83.114	-12.1417	37.5016	Mozambique	1729.72	5.12774	82.093	0.395613	1251.2	3.27189	81.5611	0.0517704	1470.55	1.40175	61.0087	0.0608503	0.938803	3.66347	0	0	98.1847	4.352	160	7.38	11.75	3.25	91.1405	14.2647			15.821	43.52	47.0173	47.9989	43.52	0.28	0.646667	0.477059	0.28	0.00643382	2017	2	1088.42	99.02	1258.94
NIA_LDS19_20A	NIA_LDS19_2	2019-10-08 13:59:13	48.16	21.91	87.8516	-12.1416	37.5018	Mozambique	761.067	2.26618	15.2325	0.354845	282.551	0.410331	14.7007	0.0110027	1498.03	0.793011	49.6043	0.0583383	0.950545	3.66347	0	0	98.1847	4.352	160	7.38	11.75	3.25	91.1405	14.2647			15.821	43.52	47.0173	47.9989	43.52	0.28	0.646667	0.477059	0.28	0.00643382	2017	2	1088.42	99.02	1258.94
NIA_LDS19_20C	NIA_LDS19_2	2019-10-08 14:00:37	46.16	17.97	83.3944	-12.1417	37.5015	Mozambique	1105.57	2.45432	23.5354	0.3652	627.054	0.598472	23.0035	0.0213574	1525.75	0.530815	35.623	0.0519704	0.964613	3.66347	0	0	98.1847	4.352	160	7.38	11.75	3.25	91.1405	14.2647			15.821	43.52	47.0173	47.9989	43.52	0.28	0.646667	0.477059	0.28	0.00643382	2017	2	1088.42	99.02	1258.94
NIA_LDS19_20D	NIA_LDS19_2	2019-10-08 14:01:14	45.77	17.13	82.5869	-12.1417	37.5015	Mozambique	1800.26	4.62456	63.9692	0.400045	1321.74	2.76871	63.4373	0.0562029	1500.29	1.14559	45.828	0.0637996	0.954203	3.66347	0	0	98.1847	4.352	160	7.38	11.75	3.25	91.1405	14.2647			15.821	43.52	47.0173	47.9989	43.52	0.28	0.646667	0.477059	0.28	0.00643382	2017	2	1088.42	99.02	1258.94
NIA_LDS19_21A	NIA_LDS19_2	2019-10-08 14:03:26	43.75	18.07	73.5814	-12.1417	37.5015	Mozambique	2454.45	4.46305	71.2048	0.422917	1975.93	2.6072	70.6729	0.0790746	1524.85	0.733412	34.7107	0.0610268	0.965468	3.66347	0	0	98.1847	4.352	160	7.38	11.75	3.25	91.1405	14.2647			15.821	43.52	47.0173	47.9989	43.52	0.28	0.646667	0.477059	0.28	0.00643382	2017	2	1088.42	99.02	1258.94
NIA_LDS19_21B	NIA_LDS19_2	2019-10-08 14:04:04	51.53	17.69	109.484	-12.1416	37.5015	Mozambique	1990.37	3.79841	54.1126	0.398599	1511.85	1.94256	53.5807	0.0547567	1525.6	0.714539	34.411	0.0552584	0.965773	3.66347	0	0	98.1847	4.352	160	7.38	11.75	3.25	91.1405	14.2647			15.821	43.52	47.0173	47.9989	43.52	0.28	0.646667	0.477059	0.28	0.00643382	2017	2	1088.42	99.02	1258.94
NIA_LDS19_21C	NIA_LDS19_2	2019-10-08 14:04:52	56.94	16.74	143.758	-12.1416	37.5015	Mozambique	1313.11	3.07528	34.3725	0.443151	834.599	1.21943	33.8406	0.0993086	1516.2	0.807528	39.1268	0.180424	0.961033	3.66347	0	0	98.1847	4.352	160	7.38	11.75	3.25	91.1405	14.2647			15.821	43.52	47.0173	47.9989	43.52	0.28	0.646667	0.477059	0.28	0.00643382	2017	2	1088.42	99.02	1258.94
NIA_LDS19_21D	NIA_LDS19_2	2019-10-08 14:05:30	56.38	15.67	141.789	-12.1418	37.5013	Mozambique	2012.58	5.81503	92.1609	0.40999	1534.06	3.95918	91.629	0.0661477	1479.05	1.39145	56.2251	0.06378	0.943637	3.66347	0	0	98.1847	4.352	160	7.38	11.75	3.25	91.1405	14.2647			15.821	43.52	47.0173	47.9989	43.52	0.28	0.646667	0.477059	0.28	0.00643382	2017	2	1088.42	99.02	1258.94
NIA_LDS19_22B	NIA_LDS19_2	2019-10-08 14:08:37	48.45	14.28	97.8506	-12.1417	37.5014	Mozambique	2238.11	3.63326	52.2185	0.403912	1759.59	1.77741	51.6866	0.0600697	1537.36	0.566073	28.7408	0.0524867	0.971464	3.66347	0	0	98.1847	4.352	160	7.38	11.75	3.25	91.1405	14.2647			15.821	43.52	47.0173	47.9989	43.52	0.28	0.646667	0.477059	0.28	0.00643382	2017	2	1088.42	99.02	1258.94
NIA_LDS19_22C	NIA_LDS19_2	2019-10-08 14:09:20	54.23	14.84	129.182	-12.1417	37.5014	Mozambique	1516.95	3.35641	43.3126	0.38699	1038.43	1.50056	42.7808	0.0431475	1515.26	0.798149	39.7297	0.0629644	0.960433	3.66347	0	0	98.1847	4.352	160	7.38	11.75	3.25	91.1405	14.2647			15.821	43.52	47.0173	47.9989	43.52	0.28	0.646667	0.477059	0.28	0.00643382	2017	2	1088.42	99.02	1258.94
NIA_LDS19_22D	NIA_LDS19_2	2019-10-08 14:09:58	53.03	13.75	123.451	-12.1417	37.5014	Mozambique	838.195	2.16609	11.9948	0.355017	359.68	0.310236	11.463	0.0111745	1534.23	0.482379	31.1193	0.0476686	0.969114	3.66347	0	0	98.1847	4.352	160	7.38	11.75	3.25	91.1405	14.2647			15.821	43.52	47.0173	47.9989	43.52	0.28	0.646667	0.477059	0.28	0.00643382	2017	2	1088.42	99.02	1258.94
NIA_LDS19_23B	NIA_LDS19_2	2019-10-08 14:13:45	57.57	14.13	152.742	-12.1417	37.5011	Mozambique	1879.96	3.67678	48.5118	0.398072	1401.44	1.82093	47.9799	0.0542293	1527.47	0.723453	33.2823	0.0591099	0.966897	3.66347	0	0	98.1847	4.352	160	7.38	11.75	3.25	91.1405	14.2647			15.821	43.52	47.0173	47.9989	43.52	0.28	0.646667	0.477059	0.28	0.00643382	2017	2	1088.42	99.02	1258.94
NIA_LDS19_23C	NIA_LDS19_2	2019-10-08 14:14:30	64.75	14.69	211.15	-12.1418	37.5008	Mozambique	984.68	3.6269	44.4772	0.363003	506.164	1.77105	43.9453	0.0191603	1433.43	1.82825	79.2051	0.0542646	0.920115	3.66347	0	0	98.1847	4.352	160	7.38	11.75	3.25	91.1405	14.2647			15.821	43.52	47.0173	47.9989	43.52	0.28	0.646667	0.477059	0.28	0.00643382	2017	2	1088.42	99.02	1258.94
NIA_LDS19_24B	NIA_LDS19_2	2019-10-08 14:18:09	60.94	14.32	178.319	-12.1415	37.5013	Mozambique	661.512	2.07014	5.8991	0.397856	182.996	0.214287	5.36723	0.054014	1536.37	0.655797	28.6787	0.453512	0.971506	3.66347	0	0	98.1847	4.352	160	7.38	11.75	3.25	91.1405	14.2647			15.821	43.52	47.0173	47.9989	43.52	0.28	0.646667	0.477059	0.28	0.00643382	2017	2	1088.42	99.02	1258.94
NIA_LDS19_24C	NIA_LDS19_2	2019-10-08 14:18:46	58	13.27	157.426	-12.1415	37.5013	Mozambique	1083.04	2.96441	28.2207	0.363066	604.526	1.10856	27.6888	0.0192237	1505.42	1.00629	43.8837	0.0478749	0.956203	3.66347	0	0	98.1847	4.352	160	7.38	11.75	3.25	91.1405	14.2647			15.821	43.52	47.0173	47.9989	43.52	0.28	0.646667	0.477059	0.28	0.00643382	2017	2	1088.42	99.02	1258.94
NIA_LDS19_24D	NIA_LDS19_2	2019-10-08 14:19:24	53.03	13.06	124.438	-12.1415	37.5013	Mozambique	1463.03	3.19599	41.0053	0.377883	984.519	1.34014	40.4734	0.034041	1515.94	0.752193	39.663	0.0524192	0.960513	3.66347	0	0	98.1847	4.352	160	7.38	11.75	3.25	91.1405	14.2647			15.821	43.52	47.0173	47.9989	43.52	0.28	0.646667	0.477059	0.28	0.00643382	2017	2	1088.42	99.02	1258.94
NIA_LDS19_25A	NIA_LDS19_2	2019-10-08 14:21:41	54.26	13.38	131.587	-12.1413	37.5013	Mozambique	2373.04	6.07967	77.5909	0.410477	1894.52	4.22382	77.059	0.0666346	1511.03	1.228	39.1158	0.0531497	0.960915	3.66347	0	0	98.1847	4.352	160	7.38	11.75	3.25	91.1405	14.2647			15.821	43.52	47.0173	47.9989	43.52	0.28	0.646667	0.477059	0.28	0.00643382	2017	2	1088.42	99.02	1258.94
NIA_LDS19_25B	NIA_LDS19_2	2019-10-08 14:22:33	64.63	14.77	209.818	-12.1413	37.5013	Mozambique	770.331	3.30423	29.0687	0.356507	291.815	1.44838	28.5368	0.0126648	1409.59	2.55027	87.7296	0.0611803	0.91092	3.66347	0	0	98.1847	4.352	160	7.38	11.75	3.25	91.1405	14.2647			15.821	43.52	47.0173	47.9989	43.52	0.28	0.646667	0.477059	0.28	0.00643382	2017	2	1088.42	99.02	1258.94
NIA_LDS19_25C	NIA_LDS19_2	2019-10-08 14:23:20	54.26	13.14	131.952	-12.1413	37.5014	Mozambique	1192.9	3.5216	51.1727	0.377468	714.384	1.66575	50.6408	0.0336258	1463.7	1.24409	66.0354	0.0689003	0.933805	3.66347	0	0	98.1847	4.352	160	7.38	11.75	3.25	91.1405	14.2647			15.821	43.52	47.0173	47.9989	43.52	0.28	0.646667	0.477059	0.28	0.00643382	2017	2	1088.42	99.02	1258.94
NIA_LDS19_25D	NIA_LDS19_2	2019-10-08 14:23:58	51.62	12.99	116.249	-12.1413	37.5015	Mozambique	1086.03	3.38828	42.7022	0.375307	607.516	1.53243	42.1703	0.031465	1464.75	1.34681	64.7097	0.0758687	0.935091	3.66347	0	0	98.1847	4.352	160	7.38	11.75	3.25	91.1405	14.2647			15.821	43.52	47.0173	47.9989	43.52	0.28	0.646667	0.477059	0.28	0.00643382	2017	2	1088.42	99.02	1258.94
NIA_LDS19_26B	NIA_LDS19_2	2019-10-08 14:27:16	47.36	14.26	92.6437	-12.1411	37.5016	Mozambique	1079.14	3.41115	44.5915	0.376688	600.621	1.5553	44.0597	0.0328459	1458.46	1.37666	68.0914	0.0797636	0.931657	3.66347	0	0	98.1847	4.352	160	7.38	11.75	3.25	91.1405	14.2647			15.821	43.52	47.0173	47.9989	43.52	0.28	0.646667	0.477059	0.28	0.00643382	2017	2	1088.42	99.02	1258.94
NIA_LDS19_26C	NIA_LDS19_2	2019-10-08 14:27:56	47.51	14	0	-12.1411	37.5015	Mozambique	1347.34	4.17183	61.0594	0.390021	868.825	2.31598	60.5275	0.0461783	1463.51	1.42206	64.8891	0.077791	0.934871	3.66347	0	0	98.1847	4.352	160	7.38	11.75	3.25	91.1405	14.2647			15.821	43.52	47.0173	47.9989	43.52	0.28	0.646667	0.477059	0.28	0.00643382	2017	2	1088.42	99.02	1258.94
NIA_LDS19_26D	NIA_LDS19_2	2019-10-08 14:28:38	47.82	14.39	94.6769	-12.1411	37.5015	Mozambique	1875.26	6.73588	99.3926	0.420179	1396.74	4.88002	98.8607	0.0763363	1456.86	1.85543	65.6271	0.0796275	0.933899	3.66347	0	0	98.1847	4.352	160	7.38	11.75	3.25	91.1405	14.2647			15.821	43.52	47.0173	47.9989	43.52	0.28	0.646667	0.477059	0.28	0.00643382	2017	2	1088.42	99.02	1258.94
NIA_LDS19_27A	NIA_LDS19_2	2019-10-08 14:31:37	50.95	12.64	112.931	-12.1411	37.5013	Mozambique	1258.67	3.19329	36.1411	0.381456	780.152	1.33744	35.6092	0.0376139	1506.43	0.941383	43.7613	0.0726355	0.956348	3.66347	0	0	98.1847	4.352	160	7.38	11.75	3.25	91.1405	14.2647			15.821	43.52	47.0173	47.9989	43.52	0.28	0.646667	0.477059	0.28	0.00643382	2017	2	1088.42	99.02	1258.94
NIA_LDS19_27B	NIA_LDS19_2	2019-10-08 14:32:13	55.06	12.82	137.631	-12.1411	37.5009	Mozambique	575.087	1.94981	4.37857	0.472529	96.5718	0.0939602	3.8467	0.128687	1520.53	0.539272	38.5469	2.02631	0.961693	3.66347	0	0	98.1847	4.352	160	7.38	11.75	3.25	91.1405	14.2647			15.821	43.52	47.0173	47.9989	43.52	0.28	0.646667	0.477059	0.28	0.00643382	2017	2	1088.42	99.02	1258.94
NIA_LDS19_27C	NIA_LDS19_2	2019-10-08 14:32:50	47.48	12.11	95.5446	-12.1413	37.5004	Mozambique	627.332	3.4943	33.2016	0.350603	148.816	1.63845	32.6697	0.00676072	1232.19	4.94519	172.16	0.0559824	0.819987	3.66347	0	0	98.1847	4.352	160	7.38	11.75	3.25	91.1405	14.2647			15.821	43.52	47.0173	47.9989	43.52	0.28	0.646667	0.477059	0.28	0.00643382	2017	2	1088.42	99.02	1258.94
NIA_LDS19_27D	NIA_LDS19_2	2019-10-08 14:34:27	46.55	13.12	90.0971	-12.1421	37.5	Mozambique	488.269	1.8662	1.29507	0.342794	9.75382	0.0103495	0.763204	-0.001048	1460.37	0.56484	72.7253	-0.15692	0.927432	3.66347	0	0	98.1847	4.352	160	7.38	11.75	3.25	91.1405	14.2647			15.821	43.52	47.0173	47.9989	43.52	0.28	0.646667	0.477059	0.28	0.00643382	2017	2	1088.42	99.02	1258.94
NIA_LDS19_28A	NIA_LDS19_2	2019-10-08 14:42:16	41.41	16.83	66.0884	-12.1411	37.5008	Mozambique	1331.62	3.87445	59.8597	0.37568	853.1	2.0186	59.3278	0.0318381	1465.5	1.26403	64.8637	0.0546968	0.934978	3.66347	0	0	98.1847	4.352	160	7.38	11.75	3.25	91.1405	14.2647			15.821	43.52	47.0173	47.9989	43.52	0.28	0.646667	0.477059	0.28	0.00643382	2017	2	1088.42	99.02	1258.94
NIA_LDS19_28B	NIA_LDS19_2	2019-10-08 14:42:56	43.51	16.91	73.699	-12.1411	37.5007	Mozambique	1368.23	4.44698	65.1515	0.388544	889.711	2.59113	64.6196	0.0447015	1457.6	1.54739	67.377	0.0732389	0.932288	3.66347	0	0	98.1847	4.352	160	7.38	11.75	3.25	91.1405	14.2647			15.821	43.52	47.0173	47.9989	43.52	0.28	0.646667	0.477059	0.28	0.00643382	2017	2	1088.42	99.02	1258.94
NIA_LDS19_28C	NIA_LDS19_2	2019-10-08 14:43:39	44.63	16.97	78.0415	-12.141	37.5008	Mozambique	1313.62	4.60929	57.5053	0.369826	835.107	2.75344	56.9735	0.0259832	1461.85	1.75694	63.4732	0.0454865	0.936134	3.66347	0	0	98.1847	4.352	160	7.38	11.75	3.25	91.1405	14.2647			15.821	43.52	47.0173	47.9989	43.52	0.28	0.646667	0.477059	0.28	0.00643382	2017	2	1088.42	99.02	1258.94
NIA_LDS19_29A	NIA_LDS19_2	2019-10-08 14:46:50	48.74	16.46	96.7588	-12.141	37.5007	Mozambique	1840.67	5.66524	72.6369	0.395643	1362.15	3.80939	72.105	0.0518003	1488.16	1.51705	50.1358	0.0565961	0.949727	3.66347	0	0	98.1847	4.352	160	7.38	11.75	3.25	91.1405	14.2647			15.821	43.52	47.0173	47.9989	43.52	0.28	0.646667	0.477059	0.28	0.00643382	2017	2	1088.42	99.02	1258.94
NIA_LDS19_29B	NIA_LDS19_2	2019-10-08 14:47:26	49.56	16.61	100.623	-12.141	37.5007	Mozambique	1674.43	4.86939	67.4884	0.39401	1195.91	3.01354	66.9565	0.0501673	1485.17	1.36419	52.9209	0.0623057	0.946981	3.66347	0	0	98.1847	4.352	160	7.38	11.75	3.25	91.1405	14.2647			15.821	43.52	47.0173	47.9989	43.52	0.28	0.646667	0.477059	0.28	0.00643382	2017	2	1088.42	99.02	1258.94
NIA_LDS19_29C	NIA_LDS19_2	2019-10-08 14:49:56	46.66	16.37	87.2131	-12.141	37.5008	Mozambique	1874.35	5.94498	89.8737	0.401709	1395.84	4.08913	89.3418	0.0578669	1470.41	1.5702	59.8986	0.0609628	0.939844	3.66347	0	0	98.1847	4.352	160	7.38	11.75	3.25	91.1405	14.2647			15.821	43.52	47.0173	47.9989	43.52	0.28	0.646667	0.477059	0.28	0.00643382	2017	2	1088.42	99.02	1258.94
NIA_LDS19_30A	NIA_LDS19_2	2019-10-08 14:51:11	51.53	15.65	112.198	-12.141	37.5007	Mozambique	1331.56	3.52647	45.3995	0.386418	853.043	1.67062	44.8676	0.0425759	1493.95	1.0665	50.0097	0.0745689	0.950031	3.66347	0	0	98.1847	4.352	160	7.38	11.75	3.25	91.1405	14.2647			15.821	43.52	47.0173	47.9989	43.52	0.28	0.646667	0.477059	0.28	0.00643382	2017	2	1088.42	99.02	1258.94
NIA_LDS19_30B	NIA_LDS19_2	2019-10-08 14:51:48	50.67	15.63	107.568	-12.141	37.5008	Mozambique	1598.26	4.69719	69.114	0.400612	1119.74	2.84134	68.5821	0.0567701	1477	1.36618	57.5746	0.074888	0.942287	3.66347	0	0	98.1847	4.352	160	7.38	11.75	3.25	91.1405	14.2647			15.821	43.52	47.0173	47.9989	43.52	0.28	0.646667	0.477059	0.28	0.00643382	2017	2	1088.42	99.02	1258.94
NIA_LDS19_30C	NIA_LDS19_2	2019-10-08 14:55:18	46.6	13.56	89.869	-12.141	37.5008	Mozambique	1655.45	6.35001	97.0766	0.40049	1176.94	4.49416	96.5447	0.0566473	1438.47	2.00223	75.0985	0.0692397	0.924189	3.66347	0	0	98.1847	4.352	160	7.38	11.75	3.25	91.1405	14.2647			15.821	43.52	47.0173	47.9989	43.52	0.28	0.646667	0.477059	0.28	0.00643382	2017	2	1088.42	99.02	1258.94
NIA_LDS19_30D	NIA_LDS19_2	2019-10-08 14:55:55	46.49	12.61	90.3498	-12.141	37.5007	Mozambique	1534.32	6.28408	82.541	0.393331	1055.8	4.42823	82.0091	0.0494888	1442.58	2.20551	71.3145	0.0676231	0.927924	3.66347	0	0	98.1847	4.352	160	7.38	11.75	3.25	91.1405	14.2647			15.821	43.52	47.0173	47.9989	43.52	0.28	0.646667	0.477059	0.28	0.00643382	2017	2	1088.42	99.02	1258.94
NIA_LDS19_31A	NIA_LDS19_2	2019-10-08 14:56:32	44.87	12.79	82.9901	-12.141	37.5007	Mozambique	950.715	3.18861	30.9897	0.363371	472.199	1.33276	30.4579	0.0195283	1470.32	1.51272	60.359	0.0608107	0.939406	3.66347	0	0	98.1847	4.352	160	7.38	11.75	3.25	91.1405	14.2647			15.821	43.52	47.0173	47.9989	43.52	0.28	0.646667	0.477059	0.28	0.00643382	2017	2	1088.42	99.02	1258.94
NIA_LDS19_31C	NIA_LDS19_2	2019-10-08 15:00:01	44.71	15.22	80.0156	-12.141	37.5007	Mozambique	741.838	2.70209	20.4358	0.352879	263.323	0.846236	19.904	0.00903658	1451.43	1.70028	69.824	0.0498129	0.929724	3.66347	0	0	98.1847	4.352	160	7.38	11.75	3.25	91.1405	14.2647			15.821	43.52	47.0173	47.9989	43.52	0.28	0.646667	0.477059	0.28	0.00643382	2017	2	1088.42	99.02	1258.94
NIA_LDS19_32A	NIA_LDS19_2	2019-10-08 15:03:26	42.05	16.56	68.5744	-12.141	37.5007	Mozambique	715.572	2.29623	12.5458	0.353604	237.056	0.440376	12.0139	0.00976143	1497.58	1.01411	48.3038	0.0616711	0.951765	3.66347	0	0	98.1847	4.352	160	7.38	11.75	3.25	91.1405	14.2647			15.821	43.52	47.0173	47.9989	43.52	0.28	0.646667	0.477059	0.28	0.00643382	2017	2	1088.42	99.02	1258.94
NIA_LDS19_32B	NIA_LDS19_2	2019-10-08 15:04:08	47.65	16.83	91.1931	-12.1409	37.5007	Mozambique	820.943	3.04701	28.8798	0.357432	342.427	1.19116	28.3479	0.0135893	1439.36	1.82513	75.8368	0.0571252	0.923544	3.66347	0	0	98.1847	4.352	160	7.38	11.75	3.25	91.1405	14.2647			15.821	43.52	47.0173	47.9989	43.52	0.28	0.646667	0.477059	0.28	0.00643382	2017	2	1088.42	99.02	1258.94
NIA_LDS19_32C	NIA_LDS19_2	2019-10-08 15:04:47	44.39	16.88	77.1645	-12.141	37.5005	Mozambique	575.881	2.13986	7.94302	0.347132	97.3656	0.284005	7.41115	0.00328958	1452.42	1.5443	70.3605	0.0490745	0.929267	3.66347	0	0	98.1847	4.352	160	7.38	11.75	3.25	91.1405	14.2647			15.821	43.52	47.0173	47.9989	43.52	0.28	0.646667	0.477059	0.28	0.00643382	2017	2	1088.42	99.02	1258.94
NIA_LDS19_33A	NIA_LDS19_2	2019-10-08 15:07:54	41.23	17.8	64.6999	-12.141	37.5004	Mozambique	1081.49	3.79252	45.0741	0.367072	602.974	1.93667	44.5423	0.0232295	1453.97	1.70229	68.3576	0.0560179	0.931211	3.66347	0	0	98.1847	4.352	160	7.38	11.75	3.25	91.1405	14.2647			15.821	43.52	47.0173	47.9989	43.52	0.28	0.646667	0.477059	0.28	0.00643382	2017	2	1088.42	99.02	1258.94
NIA_LDS19_33B	NIA_LDS19_2	2019-10-08 15:08:31	43.25	18.06	71.7026	-12.1409	37.5005	Mozambique	512.873	1.98129	4.41804	0.343606	34.3575	0.125437	3.88617	-0.000235864	1395.81	1.8576	100.481	-0.00958288	0.898384	3.66347	0	0	98.1847	4.352	160	7.38	11.75	3.25	91.1405	14.2647			15.821	43.52	47.0173	47.9989	43.52	0.28	0.646667	0.477059	0.28	0.00643382	2017	2	1088.42	99.02	1258.94
NIA_LDS19_33C	NIA_LDS19_2	2019-10-08 15:09:08	43.88	17.76	74.3594	-12.1409	37.5006	Mozambique	601.436	2.1981	10.0728	0.345956	122.921	0.342247	9.54098	0.0021137	1450.99	1.47266	71.6787	0.0249524	0.927972	3.66347	0	0	98.1847	4.352	160	7.38	11.75	3.25	91.1405	14.2647			15.821	43.52	47.0173	47.9989	43.52	0.28	0.646667	0.477059	0.28	0.00643382	2017	2	1088.42	99.02	1258.94
NIA_LDS19_33D	NIA_LDS19_2	2019-10-08 15:09:45	45.72	18.04	81.4714	-12.1408	37.5006	Mozambique	667.506	2.26416	12.2755	0.481353	188.991	0.408304	11.7436	0.137511	1477.97	1.16394	58.4499	1.07545	0.941497	3.66347	0	0	98.1847	4.352	160	7.38	11.75	3.25	91.1405	14.2647			15.821	43.52	47.0173	47.9989	43.52	0.28	0.646667	0.477059	0.28	0.00643382	2017	2	1088.42	99.02	1258.94
NIA_LDS19_34B	NIA_LDS19_2	2019-10-08 15:14:55	43.14	18.2	71.1711	-12.1408	37.5004	Mozambique	902.516	2.91768	29.2029	0.359961	424.001	1.06183	28.671	0.0161184	1467.55	1.33968	63.1579	0.055793	0.936663	3.66347	0	0	98.1847	4.352	160	7.38	11.75	3.25	91.1405	14.2647			15.821	43.52	47.0173	47.9989	43.52	0.28	0.646667	0.477059	0.28	0.00643382	2017	2	1088.42	99.02	1258.94
NIA_LDS19_34C	NIA_LDS19_2	2019-10-08 15:15:41	44.5	17.83	76.717	-12.1406	37.5004	Mozambique	1104.26	4.11329	48.6291	0.368978	625.741	2.25744	48.0972	0.025136	1447.22	1.90317	70.7974	0.0581389	0.928622	3.66347	0	0	98.1847	4.352	160	7.38	11.75	3.25	91.1405	14.2647			15.821	43.52	47.0173	47.9989	43.52	0.28	0.646667	0.477059	0.28	0.00643382	2017	2	1088.42	99.02	1258.94
NIA_LDS19_34D	NIA_LDS19_2	2019-10-08 15:19:44	38.83	18.01	56.7878	-12.1407	37.5006	Mozambique	628.144	2.3858	13.5686	0.346142	149.628	0.529949	13.0367	0.00229971	1432.74	1.84973	79.4472	0.0220219	0.919855	3.66347	0	0	98.1847	4.352	160	7.38	11.75	3.25	91.1405	14.2647			15.821	43.52	47.0173	47.9989	43.52	0.28	0.646667	0.477059	0.28	0.00643382	2017	2	1088.42	99.02	1258.94
NIA_LDS19_35A	NIA_LDS19_2	2019-10-08 15:20:21	39.77	18.22	59.5673	-12.1406	37.5007	Mozambique	1004.99	6.31467	78.4976	0.360559	526.478	4.45882	77.9657	0.0167168	1325.44	4.09184	124.922	0.0420881	0.871012	3.66347	0	0	98.1847	4.352	160	7.38	11.75	3.25	91.1405	14.2647			15.821	43.52	47.0173	47.9989	43.52	0.28	0.646667	0.477059	0.28	0.00643382	2017	2	1088.42	99.02	1258.94
NIA_LDS19_35B	NIA_LDS19_2	2019-10-08 15:20:58	41.59	18.86	65.0901	-12.1405	37.5007	Mozambique	1836.54	3.72326	45.8691	0.393586	1358.03	1.86741	45.3372	0.0497438	1528.36	0.766087	32.4735	0.0559867	0.967694	3.66347	0	0	98.1847	4.352	160	7.38	11.75	3.25	91.1405	14.2647			15.821	43.52	47.0173	47.9989	43.52	0.28	0.646667	0.477059	0.28	0.00643382	2017	2	1088.42	99.02	1258.94
NIA_LDS19_35C	NIA_LDS19_2	2019-10-08 15:21:36	42.91	18.71	69.8841	-12.1406	37.5008	Mozambique	720.879	3.43627	33.6557	0.35474	242.363	1.58042	33.1238	0.0108979	1349.54	3.20785	117.386	0.0606867	0.879763	3.66347	0	0	98.1847	4.352	160	7.38	11.75	3.25	91.1405	14.2647			15.821	43.52	47.0173	47.9989	43.52	0.28	0.646667	0.477059	0.28	0.00643382	2017	2	1088.42	99.02	1258.94
NIA_LDS19_35D	NIA_LDS19_2	2019-10-08 15:22:10	41.72	18.4	65.9087	-12.1406	37.5007	Mozambique	885.657	3.05363	29.3407	0.36113	407.141	1.19778	28.8089	0.0172875	1460.21	1.56591	65.7586	0.0620055	0.933917	3.66347	0	0	98.1847	4.352	160	7.38	11.75	3.25	91.1405	14.2647			15.821	43.52	47.0173	47.9989	43.52	0.28	0.646667	0.477059	0.28	0.00643382	2017	2	1088.42	99.02	1258.94
NIA_LDS19_36B	NIA_LDS19_2	2019-10-08 15:27:06	44.82	19.29	76.6072	-12.1405	37.5011	Mozambique	908.452	3.41903	34.9972	0.362523	429.936	1.56318	34.4654	0.018681	1442.24	1.91146	73.5825	0.0626707	0.925785	3.66347	0	0	98.1847	4.352	160	7.38	11.75	3.25	91.1405	14.2647			15.821	43.52	47.0173	47.9989	43.52	0.28	0.646667	0.477059	0.28	0.00643382	2017	2	1088.42	99.02	1258.94
NIA_LDS19_36C	NIA_LDS19_2	2019-10-08 15:27:43	46.77	19.05	84.8914	-12.1404	37.5011	Mozambique	719.048	1.87311	32.8431	0.369187	240.532	0.0172594	32.3112	0.0253444	1386.66	0.0362694	118.551	0.146119	0.881576	3.66347	0	0	98.1847	4.352	160	7.38	11.75	3.25	91.1405	14.2647			15.821	43.52	47.0173	47.9989	43.52	0.28	0.646667	0.477059	0.28	0.00643382	2017	2	1088.42	99.02	1258.94
NIA_LDS19_36D	NIA_LDS19_2	2019-10-08 15:28:18	47.85	18.56	90.2015	-12.1404	37.5011	Mozambique	951.257	3.89075	41.0716	0.367633	472.742	2.0349	40.5398	0.0237904	1430.29	2.24421	78.0619	0.0719835	0.921018	3.66347	0	0	98.1847	4.352	160	7.38	11.75	3.25	91.1405	14.2647			15.821	43.52	47.0173	47.9989	43.52	0.28	0.646667	0.477059	0.28	0.00643382	2017	2	1088.42	99.02	1258.94
NIA_LDS19_37A	NIA_LDS19_2	2019-10-08 15:28:20	47.85	18.58	90.1794	-12.1404	37.5011	Mozambique	1931.51	5.17724	81.2571	0.399296	1453	3.32139	80.7252	0.0554534	1487.3	1.23929	52.5895	0.0567663	0.947367	3.66347	0	0	98.1847	4.352	160	7.38	11.75	3.25	91.1405	14.2647			15.821	43.52	47.0173	47.9989	43.52	0.28	0.646667	0.477059	0.28	0.00643382	2017	2	1088.42	99.02	1258.94
NIA_LDS19_37B	NIA_LDS19_2	2019-10-08 15:28:55	48.45	18.52	93.0106	-12.1405	37.5011	Mozambique	1895.78	4.7244	70.2687	0.406779	1417.26	2.86855	69.7368	0.0629361	1498.84	1.10583	46.9379	0.0665632	0.953102	3.66347	0	0	98.1847	4.352	160	7.38	11.75	3.25	91.1405	14.2647			15.821	43.52	47.0173	47.9989	43.52	0.28	0.646667	0.477059	0.28	0.00643382	2017	2	1088.42	99.02	1258.94
NIA_LDS19_37C	NIA_LDS19_2	2019-10-08 15:32:17	43.48	16.86	73.6284	-12.1405	37.501	Mozambique	1494.33	4.42453	64.4552	0.390119	1015.81	2.56868	63.9233	0.0462769	1474.5	1.35913	59.0537	0.0671777	0.940797	3.66347	0	0	98.1847	4.352	160	7.38	11.75	3.25	91.1405	14.2647			15.821	43.52	47.0173	47.9989	43.52	0.28	0.646667	0.477059	0.28	0.00643382	2017	2	1088.42	99.02	1258.94
NIA_LDS19_37D	NIA_LDS19_2	2019-10-08 15:32:52	44.79	16.54	79.0951	-12.1404	37.501	Mozambique	1471.24	4.86399	63.9693	0.381966	992.729	3.00813	63.4374	0.0381236	1469.96	1.62365	59.7829	0.0564543	0.939936	3.66347	0	0	98.1847	4.352	160	7.38	11.75	3.25	91.1405	14.2647			15.821	43.52	47.0173	47.9989	43.52	0.28	0.646667	0.477059	0.28	0.00643382	2017	2	1088.42	99.02	1258.94
NIA_LDS19_38A	NIA_LDS19_2	2019-10-08 15:33:01	46.21	16.52	85.0852	-12.1404	37.501	Mozambique	1252.39	4.32359	52.2549	0.368637	773.874	2.46774	51.7231	0.0247945	1464.58	1.7024	62.2994	0.0469275	0.937351	3.66347	0	0	98.1847	4.352	160	7.38	11.75	3.25	91.1405	14.2647			15.821	43.52	47.0173	47.9989	43.52	0.28	0.646667	0.477059	0.28	0.00643382	2017	2	1088.42	99.02	1258.94
NIA_LDS19_38B	NIA_LDS19_2	2019-10-08 15:33:36	47.39	16.72	90.1222	-12.1405	37.501	Mozambique	1237.31	3.33883	43.466	0.373155	758.792	1.48298	42.9341	0.029313	1487.78	1.05992	53.5768	0.0574787	0.946448	3.66347	0	0	98.1847	4.352	160	7.38	11.75	3.25	91.1405	14.2647			15.821	43.52	47.0173	47.9989	43.52	0.28	0.646667	0.477059	0.28	0.00643382	2017	2	1088.42	99.02	1258.94
NIA_LDS19_38C	NIA_LDS19_2	2019-10-08 15:33:42	47.51	16.3	91.1277	-12.1405	37.5009	Mozambique	601.911	2.30374	12.3182	0.349737	123.395	0.447891	11.7863	0.00589463	1420.3	1.87921	86.3413	0.0678529	0.912811	3.66347	0	0	98.1847	4.352	160	7.38	11.75	3.25	91.1405	14.2647			15.821	43.52	47.0173	47.9989	43.52	0.28	0.646667	0.477059	0.28	0.00643382	2017	2	1088.42	99.02	1258.94
NIA_LDS19_cal4	NIA_LDS19_3	calibration						Mozambique	4559.36	14.6143	97.3764	1.1059	4096.73	12.8053	97.219	0.785091	1584.71	1.80561	23.9343	0.303712	0.976819
NIA_LDS19_39A	NIA_LDS19_3	2019-10-09 13:45:58	41.03	28.96	55.3277	-12.1443	37.4954	Mozambique	1043.17	2.72191	31.3359	0.347151	580.538	0.912952	31.1785	0.0263402	1523.84	0.87353	52.086	0.0691446	0.949031	4.01304	0	0	100	5.098	160	4.25	12.5	3.25	89.8447	21.2821			21.2821	44.37	47.0173	47.9989	44.37	0.29	0.646667	0.477059	0.29	0.00653595	2018	1	1088.42	99.02	1258.94
NIA_LDS19_39B	NIA_LDS19_3	2019-10-09 13:46:38	50.19	27.37	90.4261	-12.1443	37.4954	Mozambique	885.605	2.67131	27.8703	0.343801	422.973	0.862354	27.7129	0.0229902	1502.35	1.11652	62.6466	0.0816639	0.93851	4.01304	0	0	100	5.098	160	4.25	12.5	3.25	89.8447	21.2821			21.2821	44.37	47.0173	47.9989	44.37	0.29	0.646667	0.477059	0.29	0.00653595	2018	1	1088.42	99.02	1258.94
NIA_LDS19_39C	NIA_LDS19_3	2019-10-09 13:47:16	59.76	27.08	143.701	-12.1443	37.4951	Mozambique	957.433	2.12051	6.35838	0.334745	494.801	0.311554	6.20099	0.013934	1598.96	0.366995	12.7534	0.045031	0.987623	4.01304	0	0	100	5.098	160	4.25	12.5	3.25	89.8447	21.2821			21.2821	44.37	47.0173	47.9989	44.37	0.29	0.646667	0.477059	0.29	0.00653595	2018	1	1088.42	99.02	1258.94
NIA_LDS19_39D	NIA_LDS19_3	2019-10-09 13:50:19	48.08	24.34	84.7759	-12.1443	37.4952	Mozambique	1172.17	2.56985	20.9995	0.34559	709.539	0.760898	20.8421	0.0247797	1566.97	0.612535	29.2943	0.054728	0.971464	4.01304	0	0	100	5.098	160	4.25	12.5	3.25	89.8447	21.2821			21.2821	44.37	47.0173	47.9989	44.37	0.29	0.646667	0.477059	0.29	0.00653595	2018	1	1088.42	99.02	1258.94
NIA_LDS19_40A	NIA_LDS19_3	2019-10-09 13:50:59	45.69	23.39	76.0365	-12.1443	37.4951	Mozambique	938.285	2.74332	22.8521	0.346858	475.653	0.934368	22.6947	0.0260475	1530.89	1.09621	46.4874	0.0838397	0.95446	4.01304	0	0	100	5.098	160	4.25	12.5	3.25	89.8447	21.2821			21.2821	44.37	47.0173	47.9989	44.37	0.29	0.646667	0.477059	0.29	0.00653595	2018	1	1088.42	99.02	1258.94
NIA_LDS19_40C	NIA_LDS19_3	2019-10-09 13:52:20	48.08	23.12	86.1429	-12.1444	37.4951	Mozambique	1229.54	2.91406	29.7773	0.357113	766.905	1.10511	29.6199	0.0363022	1549.1	0.813701	38.0785	0.0733334	0.962814	4.01304	0	0	100	5.098	160	4.25	12.5	3.25	89.8447	21.2821			21.2821	44.37	47.0173	47.9989	44.37	0.29	0.646667	0.477059	0.29	0.00653595	2018	1	1088.42	99.02	1258.94
NIA_LDS19_40D	NIA_LDS19_3	2019-10-09 13:54:45	48.57	22.31	89.2198	-12.1443	37.495	Mozambique	802.758	2.40406	15.4607	0.340716	340.126	0.595099	15.3033	0.0199049	1536.68	0.98006	44.0033	0.0899355	0.956944	4.01304	0	0	100	5.098	160	4.25	12.5	3.25	89.8447	21.2821			21.2821	44.37	47.0173	47.9989	44.37	0.29	0.646667	0.477059	0.29	0.00653595	2018	1	1088.42	99.02	1258.94
NIA_LDS19_41A	NIA_LDS19_3	2019-10-09 13:55:24	49.27	22.71	91.9235	-12.1443	37.495	Mozambique	1306.5	3.03989	31.2271	0.358495	843.868	1.23093	31.0697	0.0376845	1551.96	0.825204	36.3664	0.0693103	0.964489	4.01304	0	0	100	5.098	160	4.25	12.5	3.25	89.8447	21.2821			21.2821	44.37	47.0173	47.9989	44.37	0.29	0.646667	0.477059	0.29	0.00653595	2018	1	1088.42	99.02	1258.94
NIA_LDS19_41B	NIA_LDS19_3	2019-10-09 13:57:03	54.46	21.71	120.084	-12.1443	37.495	Mozambique	939.469	2.5054	19.8639	0.347626	476.837	0.696443	19.7065	0.0268154	1544.54	0.82231	40.6252	0.0868645	0.960313	4.01304	0	0	100	5.098	160	4.25	12.5	3.25	89.8447	21.2821			21.2821	44.37	47.0173	47.9989	44.37	0.29	0.646667	0.477059	0.29	0.00653595	2018	1	1088.42	99.02	1258.94
NIA_LDS19_41C	NIA_LDS19_3	2019-10-09 13:57:44	51.78	21.44	105.786	-12.1443	37.495	Mozambique	1186.22	3.40893	36.4591	0.361924	723.587	1.59997	36.3017	0.0411129	1525.37	1.22947	48.7043	0.0866745	0.952228	4.01304	0	0	100	5.098	160	4.25	12.5	3.25	89.8447	21.2821			21.2821	44.37	47.0173	47.9989	44.37	0.29	0.646667	0.477059	0.29	0.00653595	2018	1	1088.42	99.02	1258.94
NIA_LDS19_41D	NIA_LDS19_3	2019-10-09 13:58:19	50.85	20.69	102.02	-12.1443	37.495	Mozambique	1245.35	3.16378	34.9098	0.368664	782.717	1.35482	34.7524	0.0478529	1537.76	0.970255	43.4536	0.0940203	0.957488	4.01304	0	0	100	5.098	160	4.25	12.5	3.25	89.8447	21.2821			21.2821	44.37	47.0173	47.9989	44.37	0.29	0.646667	0.477059	0.29	0.00653595	2018	1	1088.42	99.02	1258.94
NIA_LDS19_42B	NIA_LDS19_3	2019-10-09 14:02:26	46.21	22.63	78.8577	-12.1442	37.4951	Mozambique	1902.7	5.73413	71.1569	0.404708	1440.07	3.92517	70.9995	0.0838968	1523.44	1.51363	47.8029	0.0887598	0.953014	4.01304	0	0	100	5.098	160	4.25	12.5	3.25	89.8447	21.2821			21.2821	44.37	47.0173	47.9989	44.37	0.29	0.646667	0.477059	0.29	0.00653595	2018	1	1088.42	99.02	1258.94
NIA_LDS19_42C	NIA_LDS19_3	2019-10-09 14:03:04	47.42	22.23	84.2873	-12.1442	37.4951	Mozambique	1941.85	5.90509	83.29	0.422015	1479.22	4.09613	83.1326	0.101204	1512.27	1.52648	54.091	0.103472	0.94679	4.01304	0	0	100	5.098	160	4.25	12.5	3.25	89.8447	21.2821			21.2821	44.37	47.0173	47.9989	44.37	0.29	0.646667	0.477059	0.29	0.00653595	2018	1	1088.42	99.02	1258.94
NIA_LDS19_42D	NIA_LDS19_3	2019-10-09 14:03:41	48.89	22.1	90.9064	-12.1442	37.4951	Mozambique	1871.01	6.18885	88.0098	0.417537	1408.38	4.37989	87.8524	0.0967259	1500.52	1.70101	59.5707	0.103061	0.941284	4.01304	0	0	100	5.098	160	4.25	12.5	3.25	89.8447	21.2821			21.2821	44.37	47.0173	47.9989	44.37	0.29	0.646667	0.477059	0.29	0.00653595	2018	1	1088.42	99.02	1258.94
NIA_LDS19_43B	NIA_LDS19_3	2019-10-09 14:07:19	45.88	20.49	79.6852	-12.1441	37.495	Mozambique	1537.68	3.8571	0.127753	0.32967	1075.05	2.04814	-0.0296397	0.00885951	1612.05	1.11952	-0.0282866	0.0132859	1.00003	4.01304	0	0	100	5.098	160	4.25	12.5	3.25	89.8447	21.2821			21.2821	44.37	47.0173	47.9989	44.37	0.29	0.646667	0.477059	0.29	0.00653595	2018	1	1088.42	99.02	1258.94
NIA_LDS19_43C	NIA_LDS19_3	2019-10-09 14:07:56	47.82	20.77	87.6212	-12.1441	37.495	Mozambique	1500.23	4.03251	53.8032	0.400813	1037.6	2.22355	53.6458	0.0800026	1523.36	1.18998	50.1263	0.117464	0.95084	4.01304	0	0	100	5.098	160	4.25	12.5	3.25	89.8447	21.2821			21.2821	44.37	47.0173	47.9989	44.37	0.29	0.646667	0.477059	0.29	0.00653595	2018	1	1088.42	99.02	1258.94
NIA_LDS19_43D	NIA_LDS19_3	2019-10-09 14:08:34	48.08	20.17	89.4484	-12.1441	37.495	Mozambique	1411.44	4.4522	55.5275	0.394374	948.803	2.64325	55.3701	0.0735635	1508.79	1.53218	56.0383	0.116989	0.94486	4.01304	0	0	100	5.098	160	4.25	12.5	3.25	89.8447	21.2821			21.2821	44.37	47.0173	47.9989	44.37	0.29	0.646667	0.477059	0.29	0.00653595	2018	1	1088.42	99.02	1258.94
NIA_LDS19_44A	NIA_LDS19_3	2019-10-09 14:11:50	43.33	19.08	71.1055	-12.1442	37.4951	Mozambique	844.346	3.17287	28.8852	0.360826	381.714	1.36392	28.7279	0.0400152	1478.09	1.92518	70.7986	0.15496	0.930007	4.01304	0	0	100	5.098	160	4.25	12.5	3.25	89.8447	21.2821			21.2821	44.37	47.0173	47.9989	44.37	0.29	0.646667	0.477059	0.29	0.00653595	2018	1	1088.42	99.02	1258.94
NIA_LDS19_44B	NIA_LDS19_3	2019-10-09 14:12:28	43.35	18.7	71.5138	-12.1441	37.495	Mozambique	1354.5	3.67001	41.2753	0.379286	891.868	1.86105	41.1179	0.0584754	1532.69	1.16582	44.9719	0.100498	0.955929	4.01304	0	0	100	5.098	160	4.25	12.5	3.25	89.8447	21.2821			21.2821	44.37	47.0173	47.9989	44.37	0.29	0.646667	0.477059	0.29	0.00653595	2018	1	1088.42	99.02	1258.94
NIA_LDS19_44C	NIA_LDS19_3	2019-10-09 14:13:05	45.44	19.36	79.018	-12.1441	37.495	Mozambique	1133.39	3.854	44.2782	0.381439	670.756	2.04504	44.1208	0.0606282	1495.67	1.66224	62.614	0.135199	0.938282	4.01304	0	0	100	5.098	160	4.25	12.5	3.25	89.8447	21.2821			21.2821	44.37	47.0173	47.9989	44.37	0.29	0.646667	0.477059	0.29	0.00653595	2018	1	1088.42	99.02	1258.94
NIA_LDS19_45A	NIA_LDS19_3	2019-10-09 14:16:39	41.69	18.34	65.8531	-12.1442	37.4951	Mozambique	868.286	2.688	9.71219	0.336779	405.654	0.879044	9.5548	0.0159682	1569.33	1.23962	23.5254	0.0617796	0.976988	4.01304	0	0	100	5.098	160	4.25	12.5	3.25	89.8447	21.2821			21.2821	44.37	47.0173	47.9989	44.37	0.29	0.646667	0.477059	0.29	0.00653595	2018	1	1088.42	99.02	1258.94
NIA_LDS19_45B	NIA_LDS19_3	2019-10-09 14:17:17	41.46	18.09	65.259	-12.1441	37.495	Mozambique	1029.29	3.77477	33.8644	0.451333	566.658	1.96581	33.707	0.130523	1502.75	1.90033	56.8909	0.346163	0.943856	4.01304	0	0	100	5.098	160	4.25	12.5	3.25	89.8447	21.2821			21.2821	44.37	47.0173	47.9989	44.37	0.29	0.646667	0.477059	0.29	0.00653595	2018	1	1088.42	99.02	1258.94
NIA_LDS19_45C	NIA_LDS19_3	2019-10-09 14:17:54	42.59	18.78	68.6662	-12.144	37.495	Mozambique	823.351	2.77461	10.9867	0.337836	360.718	0.965649	10.8293	0.0170257	1555.06	1.51747	29.7124	0.0734032	0.970854	4.01304	0	0	100	5.098	160	4.25	12.5	3.25	89.8447	21.2821			21.2821	44.37	47.0173	47.9989	44.37	0.29	0.646667	0.477059	0.29	0.00653595	2018	1	1088.42	99.02	1258.94
NIA_LDS19_45D	NIA_LDS19_3	2019-10-09 14:18:31	40.8	18.3	62.8599	-12.144	37.495	Mozambique	1541.45	5.31006	63.5065	0.388161	1078.82	3.5011	63.3491	0.0673501	1505.34	1.78078	56.2578	0.0939837	0.944536	4.01304	0	0	100	5.098	160	4.25	12.5	3.25	89.8447	21.2821			21.2821	44.37	47.0173	47.9989	44.37	0.29	0.646667	0.477059	0.29	0.00653595	2018	1	1088.42	99.02	1258.94
NIA_LDS19_46A	NIA_LDS19_3	2019-10-09 14:21:07	41.15	19.73	62.9142	-12.144	37.495	Mozambique	1316.32	4.30888	48.313	0.365377	853.69	2.49992	48.1556	0.0445663	1510.93	1.61285	54.2437	0.0788826	0.946603	4.01304	0	0	100	5.098	160	4.25	12.5	3.25	89.8447	21.2821			21.2821	44.37	47.0173	47.9989	44.37	0.29	0.646667	0.477059	0.29	0.00653595	2018	1	1088.42	99.02	1258.94
NIA_LDS19_46B	NIA_LDS19_3	2019-10-09 14:21:46	45.83	20.21	79.7618	-12.144	37.495	Mozambique	980.77	2.94841	22.4802	0.392157	518.137	1.13946	22.3228	0.0713459	1536.83	1.23197	42.1393	0.211631	0.958697	4.01304	0	0	100	5.098	160	4.25	12.5	3.25	89.8447	21.2821			21.2821	44.37	47.0173	47.9989	44.37	0.29	0.646667	0.477059	0.29	0.00653595	2018	1	1088.42	99.02	1258.94
NIA_LDS19_46C	NIA_LDS19_3	2019-10-09 14:22:23	44.47	19.89	74.678	-12.144	37.495	Mozambique	1045.4	3.85147	38.9751	0.352378	582.768	2.04251	38.8177	0.0315671	1491.58	1.90563	63.2323	0.0808008	0.93755	4.01304	0	0	100	5.098	160	4.25	12.5	3.25	89.8447	21.2821			21.2821	44.37	47.0173	47.9989	44.37	0.29	0.646667	0.477059	0.29	0.00653595	2018	1	1088.42	99.02	1258.94
NIA_LDS19_46D	NIA_LDS19_3	2019-10-09 14:22:58	42.91	19.85	68.9041	-12.144	37.495	Mozambique	1139.04	4.28412	44.1521	0.36559	676.405	2.47516	43.9947	0.0447794	1493.02	1.99152	61.8041	0.0988479	0.93893	4.01304	0	0	100	5.098	160	4.25	12.5	3.25	89.8447	21.2821			21.2821	44.37	47.0173	47.9989	44.37	0.29	0.646667	0.477059	0.29	0.00653595	2018	1	1088.42	99.02	1258.94
NIA_LDS19_47A	NIA_LDS19_3	2019-10-09 14:25:33	43.06	20.75	68.6656	-12.1438	37.4952	Mozambique	1206.86	2.81036	31.5937	0.363299	744.225	1.0014	31.4363	0.0424885	1543.81	0.757211	41.5027	0.0881432	0.959472	4.01304	0	0	100	5.098	160	4.25	12.5	3.25	89.8447	21.2821			21.2821	44.37	47.0173	47.9989	44.37	0.29	0.646667	0.477059	0.29	0.00653595	2018	1	1088.42	99.02	1258.94
NIA_LDS19_47B	NIA_LDS19_3	2019-10-09 14:26:09	45.04	21.35	75.5017	-12.1438	37.4953	Mozambique	1917.11	3.65723	54.62	0.396208	1454.48	1.84827	54.4626	0.0753969	1552.18	0.718988	36.9905	0.0804669	0.963907	4.01304	0	0	100	5.098	160	4.25	12.5	3.25	89.8447	21.2821			21.2821	44.37	47.0173	47.9989	44.37	0.29	0.646667	0.477059	0.29	0.00653595	2018	1	1088.42	99.02	1258.94
NIA_LDS19_47C	NIA_LDS19_3	2019-10-09 14:26:46	47.76	20.87	87.2462	-12.1437	37.4953	Mozambique	2275.48	3.35269	54.1799	0.409046	1812.85	1.54373	54.0225	0.0882355	1567.75	0.486642	29.7336	0.0763114	0.971063	4.01304	0	0	100	5.098	160	4.25	12.5	3.25	89.8447	21.2821			21.2821	44.37	47.0173	47.9989	44.37	0.29	0.646667	0.477059	0.29	0.00653595	2018	1	1088.42	99.02	1258.94
NIA_LDS19_47D	NIA_LDS19_3	2019-10-09 14:27:21	52.06	20.81	108.107	-12.1437	37.4953	Mozambique	1114.6	2.44332	18.2348	0.346858	651.972	0.634365	18.0774	0.026047	1570.42	0.55699	27.7128	0.0627444	0.973021	4.01304	0	0	100	5.098	160	4.25	12.5	3.25	89.8447	21.2821			21.2821	44.37	47.0173	47.9989	44.37	0.29	0.646667	0.477059	0.29	0.00653595	2018	1	1088.42	99.02	1258.94
NIA_LDS19_48A	NIA_LDS19_3	2019-10-09 14:30:08	44.77	18.98	76.7037	-12.1437	37.4952	Mozambique	2171.61	3.95652	54.1694	0.403662	1708.98	2.14756	54.012	0.0828515	1561.98	0.715492	31.4185	0.07573	0.969363	4.01304	0	0	100	5.098	160	4.25	12.5	3.25	89.8447	21.2821			21.2821	44.37	47.0173	47.9989	44.37	0.29	0.646667	0.477059	0.29	0.00653595	2018	1	1088.42	99.02	1258.94
NIA_LDS19_48B	NIA_LDS19_3	2019-10-09 14:30:51	54.63	20.91	122.308	-12.1436	37.4951	Mozambique	940.367	3.32461	34.9483	0.353376	477.735	1.51566	34.7909	0.0325656	1484.19	1.71642	68.7899	0.101179	0.932119	4.01304	0	0	100	5.098	160	4.25	12.5	3.25	89.8447	21.2821			21.2821	44.37	47.0173	47.9989	44.37	0.29	0.646667	0.477059	0.29	0.00653595	2018	1	1088.42	99.02	1258.94
NIA_LDS19_48C	NIA_LDS19_3	2019-10-09 14:31:30	48.36	18.91	92.1481	-12.1437	37.4952	Mozambique	958.405	3.54752	37.9978	0.3574	495.773	1.73856	37.8404	0.0365888	1476.9	1.8879	71.7433	0.109005	0.929086	4.01304	0	0	100	5.098	160	4.25	12.5	3.25	89.8447	21.2821			21.2821	44.37	47.0173	47.9989	44.37	0.29	0.646667	0.477059	0.29	0.00653595	2018	1	1088.42	99.02	1258.94
NIA_LDS19_48D	NIA_LDS19_3	2019-10-09 14:32:07	46.33	18.85	83.2178	-12.1437	37.4952	Mozambique	946.952	2.84111	25.685	0.350625	484.32	1.03216	25.5276	0.0298144	1521.84	1.18224	51.051	0.0936901	0.949931	4.01304	0	0	100	5.098	160	4.25	12.5	3.25	89.8447	21.2821			21.2821	44.37	47.0173	47.9989	44.37	0.29	0.646667	0.477059	0.29	0.00653595	2018	1	1088.42	99.02	1258.94
NIA_LDS19_49A	NIA_LDS19_3	2019-10-09 14:35:57	40.14	20.88	58.7778	-12.1439	37.4952	Mozambique	939.951	3.00566	28.0119	0.352171	477.319	1.19671	27.8546	0.0313606	1510.55	1.3805	56.1022	0.0992523	0.944861	4.01304	0	0	100	5.098	160	4.25	12.5	3.25	89.8447	21.2821			21.2821	44.37	47.0173	47.9989	44.37	0.29	0.646667	0.477059	0.29	0.00653595	2018	1	1088.42	99.02	1258.94
NIA_LDS19_49B	NIA_LDS19_3	2019-10-09 14:36:40	40.57	21.11	59.962	-12.1437	37.4953	Mozambique	746.569	2.39486	15.7807	0.342713	283.937	0.585904	15.6233	0.0219027	1518.61	1.14227	53.1807	0.117152	0.947846	4.01304	0	0	100	5.098	160	4.25	12.5	3.25	89.8447	21.2821			21.2821	44.37	47.0173	47.9989	44.37	0.29	0.646667	0.477059	0.29	0.00653595	2018	1	1088.42	99.02	1258.94
NIA_LDS19_49C	NIA_LDS19_3	2019-10-09 14:37:19	39.82	21.28	57.4917	-12.1437	37.4953	Mozambique	821.488	2.45294	20.7346	0.352358	358.856	0.643985	20.5773	0.0315476	1516.66	0.992122	55.3494	0.133341	0.945768	4.01304	0	0	100	5.098	160	4.25	12.5	3.25	89.8447	21.2821			21.2821	44.37	47.0173	47.9989	44.37	0.29	0.646667	0.477059	0.29	0.00653595	2018	1	1088.42	99.02	1258.94
NIA_LDS19_50A	NIA_LDS19_3	2019-10-09 14:43:13	40.22	23.39	57.156	-12.1436	37.4951	Mozambique	839.063	3.04607	27.6321	0.350422	376.431	1.23711	27.4747	0.0296108	1483.25	1.77688	68.9	0.116683	0.931977	4.01304	0	0	100	5.098	160	4.25	12.5	3.25	89.8447	21.2821			21.2821	44.37	47.0173	47.9989	44.37	0.29	0.646667	0.477059	0.29	0.00653595	2018	1	1088.42	99.02	1258.94
NIA_LDS19_50B	NIA_LDS19_3	2019-10-09 14:43:51	40.24	23.15	57.3961	-12.1436	37.4952	Mozambique	1044.66	3.8463	42.2279	0.363699	582.031	2.03735	42.0705	0.0428887	1483.01	1.89227	68.2233	0.109287	0.93259	4.01304	0	0	100	5.098	160	4.25	12.5	3.25	89.8447	21.2821			21.2821	44.37	47.0173	47.9989	44.37	0.29	0.646667	0.477059	0.29	0.00653595	2018	1	1088.42	99.02	1258.94
NIA_LDS19_50C	NIA_LDS19_3	2019-10-09 14:46:55	39.77	22.39	56.53	-12.1436	37.4955	Mozambique	1365.42	5.01006	61.4873	0.373577	902.788	3.2011	61.3299	0.0527663	1489.31	1.92496	64.3917	0.0870536	0.936387	4.01304	0	0	100	5.098	160	4.25	12.5	3.25	89.8447	21.2821			21.2821	44.37	47.0173	47.9989	44.37	0.29	0.646667	0.477059	0.29	0.00653595	2018	1	1088.42	99.02	1258.94
NIA_LDS19_51A	NIA_LDS19_3	2019-10-09 14:48:44	39.62	23.45	55.3129	-12.1435	37.4951	Mozambique	494.665	1.92544	3.15943	0.332202	32.0328	0.116487	3.00203	0.0113912	1450.59	1.92287	86.5213	0.51588	0.914313	4.01304	0	0	100	5.098	160	4.25	12.5	3.25	89.8447	21.2821			21.2821	44.37	47.0173	47.9989	44.37	0.29	0.646667	0.477059	0.29	0.00653595	2018	1	1088.42	99.02	1258.94
NIA_LDS19_51B	NIA_LDS19_3	2019-10-09 14:49:19	39.25	23.78	53.9948	-12.1435	37.4952	Mozambique	860.345	2.48166	22.3629	0.352066	397.712	0.672703	22.2055	0.031255	1519.7	0.936986	54.0016	0.119437	0.947119	4.01304	0	0	100	5.098	160	4.25	12.5	3.25	89.8447	21.2821			21.2821	44.37	47.0173	47.9989	44.37	0.29	0.646667	0.477059	0.29	0.00653595	2018	1	1088.42	99.02	1258.94
NIA_LDS19_51C	NIA_LDS19_3	2019-10-09 14:49:22	39.47	23.88	54.5629	-12.1435	37.4952	Mozambique	863.696	3.43102	38.324	0.354757	401.064	1.62206	38.1666	0.0339458	1446.15	2.132	87.5869	0.122409	0.913106	4.01304	0	0	100	5.098	160	4.25	12.5	3.25	89.8447	21.2821			21.2821	44.37	47.0173	47.9989	44.37	0.29	0.646667	0.477059	0.29	0.00653595	2018	1	1088.42	99.02	1258.94
NIA_LDS19_51D	NIA_LDS19_3	2019-10-09 14:49:57	47.82	24.49	83.5072	-12.1435	37.4952	Mozambique	1350.57	3.23957	39.8462	0.373063	887.934	1.43061	39.6889	0.0522524	1538.06	0.903307	43.7541	0.0905167	0.957214	4.01304	0	0	100	5.098	160	4.25	12.5	3.25	89.8447	21.2821			21.2821	44.37	47.0173	47.9989	44.37	0.29	0.646667	0.477059	0.29	0.00653595	2018	1	1088.42	99.02	1258.94
NIA_LDS19_52A	NIA_LDS19_3	2019-10-09 14:54:12	39.62	23.97	54.9372	-12.1435	37.4952	Mozambique	1463.64	3.54133	46.7431	0.3762	1001.01	1.73237	46.5858	0.055389	1534.3	0.967912	45.4448	0.0849038	0.955531	4.01304	0	0	100	5.098	160	4.25	12.5	3.25	89.8447	21.2821			21.2821	44.37	47.0173	47.9989	44.37	0.29	0.646667	0.477059	0.29	0.00653595	2018	1	1088.42	99.02	1258.94
NIA_LDS19_52B	NIA_LDS19_3	2019-10-09 14:55:13	41.61	24.29	60.7982	-12.1435	37.4952	Mozambique	1481.91	4.09879	60.0002	0.382896	1019.27	2.28983	59.8428	0.0620853	1511.64	1.23789	56.4842	0.0920823	0.944545	4.01304	0	0	100	5.098	160	4.25	12.5	3.25	89.8447	21.2821			21.2821	44.37	47.0173	47.9989	44.37	0.29	0.646667	0.477059	0.29	0.00653595	2018	1	1088.42	99.02	1258.94
NIA_LDS19_52C	NIA_LDS19_3	2019-10-09 14:56:14	45.88	23.85	76.3178	-12.1434	37.4952	Mozambique	552.596	1.88255	0.834829	0.321521	89.9637	0.0735936	0.677436	0.000710007	1606.43	0.479021	7.69873	0.012679	0.992526	4.01304	0	0	100	5.098	160	4.25	12.5	3.25	89.8447	21.2821			21.2821	44.37	47.0173	47.9989	44.37	0.29	0.646667	0.477059	0.29	0.00653595	2018	1	1088.42	99.02	1258.94
NIA_LDS19_52D	NIA_LDS19_3	2019-10-09 14:57:06	41.05	22.44	60.4696	-12.1435	37.4952	Mozambique	1236.5	3.50255	45.8285	0.37046	773.864	1.69359	45.6711	0.0496498	1511.53	1.20582	56.7742	0.0969837	0.944272	4.01304	0	0	100	5.098	160	4.25	12.5	3.25	89.8447	21.2821			21.2821	44.37	47.0173	47.9989	44.37	0.29	0.646667	0.477059	0.29	0.00653595	2018	1	1088.42	99.02	1258.94
NIA_LDS19_53B	NIA_LDS19_3	2019-10-09 15:01:45	40.42	23.16	57.9405	-12.1434	37.4951	Mozambique	994.814	3.30352	29.2714	0.354114	532.182	1.49456	29.114	0.0333028	1514.36	1.55026	52.7265	0.0947722	0.948131	4.01304	0	0	100	5.098	160	4.25	12.5	3.25	89.8447	21.2821			21.2821	44.37	47.0173	47.9989	44.37	0.29	0.646667	0.477059	0.29	0.00653595	2018	1	1088.42	99.02	1258.94
NIA_LDS19_53C	NIA_LDS19_3	2019-10-09 15:02:32	41.74	23.69	61.7009	-12.1434	37.4952	Mozambique	783.838	2.57131	21.2463	0.34699	321.205	0.762356	21.0889	0.0261789	1500.05	1.29778	62.6808	0.122266	0.93839	4.01304	0	0	100	5.098	160	4.25	12.5	3.25	89.8447	21.2821			21.2821	44.37	47.0173	47.9989	44.37	0.29	0.646667	0.477059	0.29	0.00653595	2018	1	1088.42	99.02	1258.94
NIA_LDS19_53D	NIA_LDS19_3	2019-10-09 15:03:11	42.1	23.2	63.2833	-12.1434	37.4952	Mozambique	1299.04	3.3184	42.8137	0.371397	836.41	1.50945	42.6563	0.0505863	1526.66	1.0043	49.5523	0.0923391	0.951475	4.01304	0	0	100	5.098	160	4.25	12.5	3.25	89.8447	21.2821			21.2821	44.37	47.0173	47.9989	44.37	0.29	0.646667	0.477059	0.29	0.00653595	2018	1	1088.42	99.02	1258.94
NIA_LDS19_54A	NIA_LDS19_3	2019-10-09 15:08:45	37.97	23.39	50.6574	-12.1434	37.4954	Mozambique	675.51	2.07686	8.27692	0.336307	212.878	0.267901	8.11952	0.0154963	1551.11	0.711553	37.653	0.11292	0.96326	4.01304	0	0	100	5.098	160	4.25	12.5	3.25	89.8447	21.2821			21.2821	44.37	47.0173	47.9989	44.37	0.29	0.646667	0.477059	0.29	0.00653595	2018	1	1088.42	99.02	1258.94
NIA_LDS19_54C	NIA_LDS19_3	2019-10-09 15:10:21	45.2	23.94	73.618	-12.1433	37.4955	Mozambique	577.846	1.9965	6.71503	0.333754	115.214	0.187547	6.55764	0.0129432	1518.39	0.900975	55.0029	0.170589	0.946148	4.01304	0	0	100	5.098	160	4.25	12.5	3.25	89.8447	21.2821			21.2821	44.37	47.0173	47.9989	44.37	0.29	0.646667	0.477059	0.29	0.00653595	2018	1	1088.42	99.02	1258.94
NIA_LDS19_54D	NIA_LDS19_3	2019-10-09 15:11:14	40.12	23.66	56.6522	-12.1432	37.4955	Mozambique	656.002	2.12648	10.5085	0.337957	193.37	0.317521	10.3512	0.0171464	1523.67	0.912001	51.9097	0.135115	0.94919	4.01304	0	0	100	5.098	160	4.25	12.5	3.25	89.8447	21.2821			21.2821	44.37	47.0173	47.9989	44.37	0.29	0.646667	0.477059	0.29	0.00653595	2018	1	1088.42	99.02	1258.94
NIA_LDS19_55A	NIA_LDS19_3	2019-10-09 15:15:21	39.82	26.15	53.935	-12.1433	37.4955	Mozambique	1392.9	2.91477	31.4774	0.360437	930.268	1.10581	31.32	0.039626	1558.99	0.675521	33.4053	0.0664118	0.967429	4.01304	0	0	100	5.098	160	4.25	12.5	3.25	89.8447	21.2821			21.2821	44.37	47.0173	47.9989	44.37	0.29	0.646667	0.477059	0.29	0.00653595	2018	1	1088.42	99.02	1258.94
NIA_LDS19_55B	NIA_LDS19_3	2019-10-09 15:16:00	40.82	26.05	56.9574	-12.1433	37.4955	Mozambique	553.063	1.89482	4.22248	0.333222	90.4305	0.0858629	4.06509	0.012411	1541.99	0.533694	44.1158	0.211642	0.956981	4.01304	0	0	100	5.098	160	4.25	12.5	3.25	89.8447	21.2821			21.2821	44.37	47.0173	47.9989	44.37	0.29	0.646667	0.477059	0.29	0.00653595	2018	1	1088.42	99.02	1258.94
NIA_LDS19_55C	NIA_LDS19_3	2019-10-09 15:16:47	40.52	24.9	56.9301	-12.1433	37.4955	Mozambique	1268.25	2.62937	29.0059	0.479735	805.619	0.820413	28.8485	0.158925	1556.57	0.577821	35.4748	0.307087	0.965429	4.01304	0	0	100	5.098	160	4.25	12.5	3.25	89.8447	21.2821			21.2821	44.37	47.0173	47.9989	44.37	0.29	0.646667	0.477059	0.29	0.00653595	2018	1	1088.42	99.02	1258.94
NIA_LDS19_55D	NIA_LDS19_3	2019-10-09 15:17:24	42.08	25.39	61.4143	-12.1433	37.4955	Mozambique	1771.88	3.0899	41.0218	0.373798	1309.25	1.28094	40.8644	0.0529875	1564.52	0.557968	31.0785	0.063323	0.969733	4.01304	0	0	100	5.098	160	4.25	12.5	3.25	89.8447	21.2821			21.2821	44.37	47.0173	47.9989	44.37	0.29	0.646667	0.477059	0.29	0.00653595	2018	1	1088.42	99.02	1258.94
NIA_LDS19_56A	NIA_LDS19_3	2019-10-09 15:20:28	40.47	23.83	57.5881	-12.1433	37.4954	Mozambique	623.837	2.03392	7.94843	0.335319	161.205	0.224967	7.79104	0.0145083	1533.6	0.780141	47.1722	0.138032	0.953898	4.01304	0	0	100	5.098	160	4.25	12.5	3.25	89.8447	21.2821			21.2821	44.37	47.0173	47.9989	44.37	0.29	0.646667	0.477059	0.29	0.00653595	2018	1	1088.42	99.02	1258.94
NIA_LDS19_56B	NIA_LDS19_3	2019-10-09 15:21:19	40.22	23.77	56.8725	-12.1432	37.4952	Mozambique	981.226	2.63828	27.6087	0.354582	518.593	0.829319	27.4513	0.0337712	1524.9	0.888907	51.3729	0.0993093	0.949727	4.01304	0	0	100	5.098	160	4.25	12.5	3.25	89.8447	21.2821			21.2821	44.37	47.0173	47.9989	44.37	0.29	0.646667	0.477059	0.29	0.00653595	2018	1	1088.42	99.02	1258.94
NIA_LDS19_56C	NIA_LDS19_3	2019-10-09 15:22:01	40.27	24.17	56.7248	-12.1432	37.4951	Mozambique	707.85	2.27506	14.167	0.341049	245.218	0.466108	14.0096	0.0202388	1516.32	1.05062	55.134	0.125156	0.945956	4.01304	0	0	100	5.098	160	4.25	12.5	3.25	89.8447	21.2821			21.2821	44.37	47.0173	47.9989	44.37	0.29	0.646667	0.477059	0.29	0.00653595	2018	1	1088.42	99.02	1258.94
NIA_LDS19_56D	NIA_LDS19_3	2019-10-09 15:22:56	44.74	24.69	71.1878	-12.1431	37.4953	Mozambique	1273.09	2.55494	25.9655	0.360563	810.46	0.745983	25.8081	0.0397522	1563.85	0.524702	31.694	0.0767104	0.969139	4.01304	0	0	100	5.098	160	4.25	12.5	3.25	89.8447	21.2821			21.2821	44.37	47.0173	47.9989	44.37	0.29	0.646667	0.477059	0.29	0.00653595	2018	1	1088.42	99.02	1258.94
NIA_LDS19_57A	NIA_LDS19_3	2019-10-09 15:26:54	39.72	23.94	55.2533	-12.1432	37.4953	Mozambique	1021.55	2.69447	27.9979	0.354148	558.913	0.88551	27.8405	0.0333377	1529.99	0.883604	48.504	0.091266	0.952552	4.01304	0	0	100	5.098	160	4.25	12.5	3.25	89.8447	21.2821			21.2821	44.37	47.0173	47.9989	44.37	0.29	0.646667	0.477059	0.29	0.00653595	2018	1	1088.42	99.02	1258.94
NIA_LDS19_57B	NIA_LDS19_3	2019-10-09 15:27:32	41.51	24.48	60.3268	-12.1432	37.4953	Mozambique	660.226	2.22898	13.6401	0.342664	197.594	0.420028	13.4827	0.0218536	1497.62	1.16045	65.0373	0.165646	0.936124	4.01304	0	0	100	5.098	160	4.25	12.5	3.25	89.8447	21.2821			21.2821	44.37	47.0173	47.9989	44.37	0.29	0.646667	0.477059	0.29	0.00653595	2018	1	1088.42	99.02	1258.94
NIA_LDS19_57C	NIA_LDS19_3	2019-10-09 15:28:18	40.12	24.33	56.155	-12.1432	37.4953	Mozambique	826.028	2.53647	21.9586	0.346996	363.396	0.727514	21.8012	0.0261851	1511.18	1.1028	57.6998	0.108898	0.943402	4.01304	0	0	100	5.098	160	4.25	12.5	3.25	89.8447	21.2821			21.2821	44.37	47.0173	47.9989	44.37	0.29	0.646667	0.477059	0.29	0.00653595	2018	1	1088.42	99.02	1258.94
NIA_LDS19_58A	NIA_LDS19_3	2019-10-09 15:32:17	37.51	23.95	49.0495	-12.1433	37.4951	Mozambique	870.056	2.33505	13.9557	0.339192	407.424	0.526094	13.7983	0.0183815	1557.97	0.733325	33.5812	0.0702949	0.967242	4.01304	0	0	100	5.098	160	4.25	12.5	3.25	89.8447	21.2821			21.2821	44.37	47.0173	47.9989	44.37	0.29	0.646667	0.477059	0.29	0.00653595	2018	1	1088.42	99.02	1258.94
NIA_LDS19_58B	NIA_LDS19_3	2019-10-09 15:32:54	37.56	23.89	49.2215	-12.1433	37.4951	Mozambique	720.985	2.31633	18.7558	0.352376	258.353	0.507373	18.5984	0.0315655	1492.87	1.0687	68.3978	0.182411	0.932846	4.01304	0	0	100	5.098	160	4.25	12.5	3.25	89.8447	21.2821			21.2821	44.37	47.0173	47.9989	44.37	0.29	0.646667	0.477059	0.29	0.00653595	2018	1	1088.42	99.02	1258.94
NIA_LDS19_58C	NIA_LDS19_3	2019-10-09 15:33:31	37.18	23.78	48.2856	-12.1433	37.4951	Mozambique	636.743	2.12896	10.3655	0.338451	174.111	0.32	10.2081	0.0176405	1514.36	1.01455	56.5074	0.153441	0.944617	4.01304	0	0	100	5.098	160	4.25	12.5	3.25	89.8447	21.2821			21.2821	44.37	47.0173	47.9989	44.37	0.29	0.646667	0.477059	0.29	0.00653595	2018	1	1088.42	99.02	1258.94
NIA_LDS19_58D	NIA_LDS19_3	2019-10-09 15:34:06	37.22	23.75	48.4098	-12.1433	37.4952	Mozambique	770.706	2.32018	14.7472	0.34505	308.074	0.511228	14.5899	0.0242393	1533.44	0.927573	46.2191	0.12066	0.954783	4.01304	0	0	100	5.098	160	4.25	12.5	3.25	89.8447	21.2821			21.2821	44.37	47.0173	47.9989	44.37	0.29	0.646667	0.477059	0.29	0.00653595	2018	1	1088.42	99.02	1258.94
NIA_LDS19_cal5	NIA_LDS19_4	calibration						Mozambique	4536.09	14.59	99.6263	1.11166	4085.94	12.7998	99.4977	0.77793	1583.61	1.80834	24.5429	0.301527	0.976228
NIA_LDS19_59A	NIA_LDS19_4	2019-10-10 13:49:36	38.78	33.19	46.1496	-12.1455	37.4891	Mozambique	855.405	2.25729	16.7644	0.359571	405.251	0.467073	16.6359	0.0258446	1631.23	0.685323	42.6179	0.104037	0.960568	1.43829	2.80551	0.368618	37.1551	5.38553	320	7.12	10.25	2.81	74.1683	28.1212	6.10738	7.03995	14.3553	44.08	48.05	47.71	46.7849	0.27	0.74	0.49	0.57346	0.0122574	2018	1	1088.42	99.02	1258.94
NIA_LDS19_59B	NIA_LDS19_4	2019-10-10 13:50:20	41.9	30.92	56.3271	-12.1456	37.489	Mozambique	1220.92	2.98383	36.1146	0.377514	770.765	1.1936	35.986	0.0437874	1618.8	0.913805	48.102	0.0919712	0.955394	1.43829	2.80551	0.368618	37.1551	5.38553	320	7.12	10.25	2.81	74.1683	28.1212	6.10738	7.03995	14.3553	44.08	48.05	47.71	46.7849	0.27	0.74	0.49	0.57346	0.0122574	2018	1	1088.42	99.02	1258.94
NIA_LDS19_59C	NIA_LDS19_4	2019-10-10 13:51:01	44.85	30.19	66.3637	-12.1456	37.4889	Mozambique	1008.4	2.55683	21.3203	0.365691	558.241	0.76661	21.1918	0.0319645	1635.04	0.818467	39.503	0.0936275	0.963427	1.43829	2.80551	0.368618	37.1551	5.38553	320	7.12	10.25	2.81	74.1683	28.1212	6.10738	7.03995	14.3553	44.08	48.05	47.71	46.7849	0.27	0.74	0.49	0.57346	0.0122574	2018	1	1088.42	99.02	1258.94
NIA_LDS19_60A	NIA_LDS19_4	2019-10-10 13:53:26	41.1	26.71	57.2918	-12.1456	37.4887	Mozambique	1027.53	7.61121	98.1982	0.3739	577.378	5.82098	98.0697	0.0401737	1388.51	5.10275	150.099	0.0966181	0.854808	1.43829	2.80551	0.368618	37.1551	5.38553	320	7.12	10.25	2.81	74.1683	28.1212	6.10738	7.03995	14.3553	44.08	48.05	47.71	46.7849	0.27	0.74	0.49	0.57346	0.0122574	2018	1	1088.42	99.02	1258.94
NIA_LDS19_60B	NIA_LDS19_4	2019-10-10 13:54:03	42.75	26.46	62.6955	-12.1455	37.4886	Mozambique	808.011	5.12393	55.9373	0.360511	357.857	3.33371	55.8088	0.0267848	1410.13	4.78851	139.962	0.105553	0.865087	1.43829	2.80551	0.368618	37.1551	5.38553	320	7.12	10.25	2.81	74.1683	28.1212	6.10738	7.03995	14.3553	44.08	48.05	47.71	46.7849	0.27	0.74	0.49	0.57346	0.0122574	2018	1	1088.42	99.02	1258.94
NIA_LDS19_60C	NIA_LDS19_4	2019-10-10 13:54:40	42.49	25.82	62.387	-12.1455	37.4886	Mozambique	900.146	5.2497	59.0678	0.361845	449.991	3.45948	58.9393	0.0281187	1452.13	4.06941	121.049	0.0907453	0.88419	1.43829	2.80551	0.368618	37.1551	5.38553	320	7.12	10.25	2.81	74.1683	28.1212	6.10738	7.03995	14.3553	44.08	48.05	47.71	46.7849	0.27	0.74	0.49	0.57346	0.0122574	2018	1	1088.42	99.02	1258.94
NIA_LDS19_60D	NIA_LDS19_4	2019-10-10 13:55:19	41.54	24.97	60.0303	-12.1456	37.4886	Mozambique	771.416	3.35462	31.2795	0.358745	321.262	1.5644	31.1509	0.0250183	1517.13	2.69298	93.6252	0.118155	0.911607	1.43829	2.80551	0.368618	37.1551	5.38553	320	7.12	10.25	2.81	74.1683	28.1212	6.10738	7.03995	14.3553	44.08	48.05	47.71	46.7849	0.27	0.74	0.49	0.57346	0.0122574	2018	1	1088.42	99.02	1258.94
NIA_LDS19_61A	NIA_LDS19_4	2019-10-10 13:57:51	40.55	24.97	56.9676	-12.1457	37.4887	Mozambique	769.627	2.60758	17.4908	0.358231	319.473	0.817358	17.3623	0.0245051	1599.06	1.49129	55.3087	0.122664	0.948455	1.43829	2.80551	0.368618	37.1551	5.38553	320	7.12	10.25	2.81	74.1683	28.1212	6.10738	7.03995	14.3553	44.08	48.05	47.71	46.7849	0.27	0.74	0.49	0.57346	0.0122574	2018	1	1088.42	99.02	1258.94
NIA_LDS19_61B	NIA_LDS19_4	2019-10-10 13:58:30	42.7	24.3	64.3686	-12.1457	37.4886	Mozambique	606.808	2.14183	9.27039	0.350393	156.654	0.351611	9.14185	0.0166672	1594.51	1.30458	59.2213	0.16966	0.944861	1.43829	2.80551	0.368618	37.1551	5.38553	320	7.12	10.25	2.81	74.1683	28.1212	6.10738	7.03995	14.3553	44.08	48.05	47.71	46.7849	0.27	0.74	0.49	0.57346	0.0122574	2018	1	1088.42	99.02	1258.94
NIA_LDS19_61C	NIA_LDS19_4	2019-10-10 13:59:06	41.77	24.3	61.3044	-12.1457	37.4887	Mozambique	1023.25	2.89064	28.3478	0.446056	573.096	1.10042	28.2193	0.11233	1611.93	1.12823	50.5152	0.315969	0.953071	1.43829	2.80551	0.368618	37.1551	5.38553	320	7.12	10.25	2.81	74.1683	28.1212	6.10738	7.03995	14.3553	44.08	48.05	47.71	46.7849	0.27	0.74	0.49	0.57346	0.0122574	2018	1	1088.42	99.02	1258.94
NIA_LDS19_62B	NIA_LDS19_4	2019-10-10 14:02:17	48.31	23.95	86.2041	-12.1458	37.4885	Mozambique	1041.37	5.62365	63.6759	0.367733	591.216	3.83342	63.5474	0.0340067	1492.06	3.52653	102.069	0.0858289	0.902946	1.43829	2.80551	0.368618	37.1551	5.38553	320	7.12	10.25	2.81	74.1683	28.1212	6.10738	7.03995	14.3553	44.08	48.05	47.71	46.7849	0.27	0.74	0.49	0.57346	0.0122574	2018	1	1088.42	99.02	1258.94
NIA_LDS19_62C	NIA_LDS19_4	2019-10-10 14:02:55	45.77	22.65	77.0858	-12.1457	37.4884	Mozambique	600.919	2.35606	13.1573	0.344949	150.765	0.565835	13.0288	0.0112224	1540	2.10684	84.6994	0.11464	0.920456	1.43829	2.80551	0.368618	37.1551	5.38553	320	7.12	10.25	2.81	74.1683	28.1212	6.10738	7.03995	14.3553	44.08	48.05	47.71	46.7849	0.27	0.74	0.49	0.57346	0.0122574	2018	1	1088.42	99.02	1258.94
NIA_LDS19_63B	NIA_LDS19_4	2019-10-10 14:07:37	42	21.72	64.165	-12.146	37.4883	Mozambique	514.321	2.01514	4.83152	0.338711	64.1672	0.224921	4.70298	0.00498499	1562.09	1.99592	72.8655	0.121363	0.931712	1.43829	2.80551	0.368618	37.1551	5.38553	320	7.12	10.25	2.81	74.1683	28.1212	6.10738	7.03995	14.3553	44.08	48.05	47.71	46.7849	0.27	0.74	0.49	0.57346	0.0122574	2018	1	1088.42	99.02	1258.94
NIA_LDS19_63C	NIA_LDS19_4	2019-10-10 14:08:13	40.95	21.88	60.5848	-12.1461	37.4881	Mozambique	992.424	3.37826	36.3837	0.36639	542.269	1.58804	36.2552	0.0326637	1576.11	1.68249	67.0654	0.0949438	0.937332	1.43829	2.80551	0.368618	37.1551	5.38553	320	7.12	10.25	2.81	74.1683	28.1212	6.10738	7.03995	14.3553	44.08	48.05	47.71	46.7849	0.27	0.74	0.49	0.57346	0.0122574	2017	2	1088.42	99.02	1258.94
NIA_LDS19_63D	NIA_LDS19_4	2019-10-10 14:08:51	41.77	22.54	62.7297	-12.1461	37.4881	Mozambique	650.84	3.15211	27.1182	0.349765	200.686	1.36189	26.9897	0.0160387	1452.31	3.59257	124.307	0.116075	0.881456	1.43829	2.80551	0.368618	37.1551	5.38553	320	7.12	10.25	2.81	74.1683	28.1212	6.10738	7.03995	14.3553	44.08	48.05	47.71	46.7849	0.27	0.74	0.49	0.57346	0.0122574	2017	2	1088.42	99.02	1258.94
NIA_LDS19_64B	NIA_LDS19_4	2019-10-10 14:16:21	39.15	23.32	54.0303	-12.1461	37.488	Mozambique	739.22	2.31879	11.5552	0.349346	289.066	0.528568	11.4267	0.0156199	1629.14	1.08588	40.9863	0.0880379	0.961973	1.43829	2.80551	0.368618	37.1551	5.38553	320	7.12	10.25	2.81	74.1683	28.1212	6.10738	7.03995	14.3553	44.08	48.05	47.71	46.7849	0.27	0.74	0.49	0.57346	0.0122574	2017	2	1088.42	99.02	1258.94
NIA_LDS19_64C	NIA_LDS19_4	2019-10-10 14:16:57	38.54	23.56	52.1241	-12.1461	37.4881	Mozambique	597.183	2.0597	6.22068	0.348285	147.029	0.26948	6.09214	0.014559	1625.83	1.08623	42.8745	0.161002	0.960214	1.43829	2.80551	0.368618	37.1551	5.38553	320	7.12	10.25	2.81	74.1683	28.1212	6.10738	7.03995	14.3553	44.08	48.05	47.71	46.7849	0.27	0.74	0.49	0.57346	0.0122574	2018	1	1088.42	99.02	1258.94
NIA_LDS19_64D	NIA_LDS19_4	2019-10-10 14:17:33	38.63	23.73	52.2608	-12.1459	37.488	Mozambique	933.704	2.82275	25.9997	0.366266	483.549	1.03253	25.8711	0.0325399	1603.31	1.24796	54.5946	0.1079	0.949215	1.43829	2.80551	0.368618	37.1551	5.38553	320	7.12	10.25	2.81	74.1683	28.1212	6.10738	7.03995	14.3553	44.08	48.05	47.71	46.7849	0.27	0.74	0.49	0.57346	0.0122574	2018	1	1088.42	99.02	1258.94
NIA_LDS19_65A	NIA_LDS19_4	2019-10-10 14:19:44	40.5	24.61	57.0892	-12.1462	37.4881	Mozambique	1869.83	4.94839	66.5752	0.410581	1419.68	3.15817	66.4467	0.0768546	1613.97	1.30877	48.077	0.0873789	0.955289	1.43829	2.80551	0.368618	37.1551	5.38553	320	7.12	10.25	2.81	74.1683	28.1212	6.10738	7.03995	14.3553	44.08	48.05	47.71	46.7849	0.27	0.74	0.49	0.57346	0.0122574	2017	2	1088.42	99.02	1258.94
NIA_LDS19_65B	NIA_LDS19_4	2019-10-10 14:20:22	43.43	24.31	66.8567	-12.1461	37.4878	Mozambique	2085.05	5.2663	79.6801	0.443483	1634.9	3.47608	79.5516	0.109756	1611.51	1.24897	49.9055	0.108194	0.953599	1.43829	2.80551	0.368618	37.1551	5.38553	320	7.12	10.25	2.81	74.1683	28.1212	6.10738	7.03995	14.3553	44.08	48.05	47.71	46.7849	0.27	0.74	0.49	0.57346	0.0122574	2017	2	1088.42	99.02	1258.94
NIA_LDS19_65C	NIA_LDS19_4	2019-10-10 14:20:59	50.67	24.41	96.3742	-12.1461	37.4878	Mozambique	1582.54	7.02674	104.408	0.400686	1132.39	5.23652	104.28	0.0669598	1525.96	2.57225	89.4349	0.0902387	0.915677	1.43829	2.80551	0.368618	37.1551	5.38553	320	7.12	10.25	2.81	74.1683	28.1212	6.10738	7.03995	14.3553	44.08	48.05	47.71	46.7849	0.27	0.74	0.49	0.57346	0.0122574	2017	2	1088.42	99.02	1258.94
NIA_LDS19_65D	NIA_LDS19_4	2019-10-10 14:21:37	52.81	21.85	110.666	-12.1462	37.4878	Mozambique	595.552	2.44025	12.5043	0.348123	145.398	0.650024	12.3758	0.0143966	1537.54	2.50564	83.2912	0.15225	0.92156	1.43829	2.80551	0.368618	37.1551	5.38553	320	7.12	10.25	2.81	74.1683	28.1212	6.10738	7.03995	14.3553	44.08	48.05	47.71	46.7849	0.27	0.74	0.49	0.57346	0.0122574	2017	2	1088.42	99.02	1258.94
NIA_LDS19_66A	NIA_LDS19_4	2019-10-10 14:23:26	47.53	22.58	84.3756	-12.1462	37.4881	Mozambique	942.851	3.7042	32.4633	0.375907	492.697	1.91398	32.3348	0.0421804	1571.87	2.22585	65.6545	0.134579	0.938414	1.43829	2.80551	0.368618	37.1551	5.38553	320	7.12	10.25	2.81	74.1683	28.1212	6.10738	7.03995	14.3553	44.08	48.05	47.71	46.7849	0.27	0.74	0.49	0.57346	0.0122574	2017	2	1088.42	99.02	1258.94
NIA_LDS19_66B	NIA_LDS19_4	2019-10-10 14:24:03	50.7	22.48	98.9815	-12.1463	37.4879	Mozambique	1633.18	10.8308	173.97	0.397061	1183.02	9.04059	173.841	0.063335	1430.81	3.98572	133.813	0.076606	0.87188	1.43829	2.80551	0.368618	37.1551	5.38553	320	7.12	10.25	2.81	74.1683	28.1212	6.10738	7.03995	14.3553	44.08	48.05	47.71	46.7849	0.27	0.74	0.49	0.57346	0.0122574	2017	2	1088.42	99.02	1258.94
NIA_LDS19_66C	NIA_LDS19_4	2019-10-10 14:24:41	52.37	22.85	106.931	-12.1463	37.4879	Mozambique	661.79	1.93118	111.583	0.420467	211.636	0.140958	111.454	0.0867404	1078.29	0.261792	361.41	0.441973	0.655036	1.43829	2.80551	0.368618	37.1551	5.38553	320	7.12	10.25	2.81	74.1683	28.1212	6.10738	7.03995	14.3553	44.08	48.05	47.71	46.7849	0.27	0.74	0.49	0.57346	0.0122574	2017	2	1088.42	99.02	1258.94
NIA_LDS19_66D	NIA_LDS19_4	2019-10-10 14:25:18	52.81	22.85	109.25	-12.1463	37.4879	Mozambique	1272.35	6.74136	92.2987	0.382883	822.196	4.95114	92.1702	0.0491565	1488.09	3.26648	106.17	0.0889742	0.899198	1.43829	2.80551	0.368618	37.1551	5.38553	320	7.12	10.25	2.81	74.1683	28.1212	6.10738	7.03995	14.3553	44.08	48.05	47.71	46.7849	0.27	0.74	0.49	0.57346	0.0122574	2017	2	1088.42	99.02	1258.94
NIA_LDS19_67A	NIA_LDS19_4	2019-10-10 14:29:50	47.62	18.66	89.0516	-12.1465	37.4874	Mozambique	1757.28	6.61164	92.1238	0.417469	1307.12	4.82141	91.9953	0.0837424	1565.54	2.10496	70.1247	0.100305	0.934248	1.43829	2.80551	0.368618	37.1551	5.38553	320	7.12	10.25	2.81	74.1683	28.1212	6.10738	7.03995	14.3553	44.08	48.05	47.71	46.7849	0.27	0.74	0.49	0.57346	0.0122574	2017	2	1088.42	99.02	1258.94
NIA_LDS19_67C	NIA_LDS19_4	2019-10-10 14:31:17	45.47	17.97	80.5038	-12.1465	37.4872	Mozambique	533.514	2.11726	5.65169	0.42716	83.3594	0.327037	5.52315	0.0934341	1570.62	2.24612	66.2307	1.76056	0.93786	1.43829	2.80551	0.368618	37.1551	5.38553	320	7.12	10.25	2.81	74.1683	28.1212	6.10738	7.03995	14.3553	44.08	48.05	47.71	46.7849	0.27	0.74	0.49	0.57346	0.0122574	2017	2	1088.42	99.02	1258.94
NIA_LDS19_67D	NIA_LDS19_4	2019-10-10 14:32:32	41.64	18.94	65.1974	-12.1465	37.4873	Mozambique	659.159	4.10828	33.7133	0.348743	209.005	2.31806	33.5848	0.0150167	1394.91	5.63944	142.656	0.100229	0.861557	1.43829	2.80551	0.368618	37.1551	5.38553	320	7.12	10.25	2.81	74.1683	28.1212	6.10738	7.03995	14.3553	44.08	48.05	47.71	46.7849	0.27	0.74	0.49	0.57346	0.0122574	2017	2	1088.42	99.02	1258.94
NIA_LDS19_68A	NIA_LDS19_4	2019-10-10 14:36:34	43.88	20.59	71.8005	-12.1461	37.4873	Mozambique	1044	3.48978	38.5316	0.363022	593.846	1.69956	38.4031	0.0292962	1580.09	1.64841	65.0327	0.0779559	0.93926	1.43829	2.80551	0.368618	37.1551	5.38553	320	7.12	10.25	2.81	74.1683	28.1212	6.10738	7.03995	14.3553	44.08	48.05	47.71	46.7849	0.27	0.74	0.49	0.57346	0.0122574	2017	2	1088.42	99.02	1258.94
NIA_LDS19_68B	NIA_LDS19_4	2019-10-10 14:37:09	43.04	20.34	68.9489	-12.1461	37.4873	Mozambique	762.058	3.20682	31.7934	0.352878	311.904	1.4166	31.6648	0.0191517	1512.31	2.50373	97.7134	0.0928659	0.907836	1.43829	2.80551	0.368618	37.1551	5.38553	320	7.12	10.25	2.81	74.1683	28.1212	6.10738	7.03995	14.3553	44.08	48.05	47.71	46.7849	0.27	0.74	0.49	0.57346	0.0122574	2017	2	1088.42	99.02	1258.94
NIA_LDS19_69A	NIA_LDS19_4	2019-10-10 14:41:59	41.18	22.17	61.0986	-12.1458	37.4874	Mozambique	944.298	4.52209	50.2272	0.36105	494.144	2.73187	50.0987	0.027324	1506.61	3.03619	97.2145	0.0833147	0.907948	1.43829	2.80551	0.368618	37.1551	5.38553	320	7.12	10.25	2.81	74.1683	28.1212	6.10738	7.03995	14.3553	44.08	48.05	47.71	46.7849	0.27	0.74	0.49	0.57346	0.0122574	2017	2	1088.42	99.02	1258.94
NIA_LDS19_69B	NIA_LDS19_4	2019-10-10 14:42:35	43.83	22.49	69.9012	-12.1458	37.4873	Mozambique	964.206	3.62208	37.6227	0.360951	514.052	1.83186	37.4942	0.0272245	1562.28	2.02937	72.5223	0.0827446	0.93202	1.43829	2.80551	0.368618	37.1551	5.38553	320	7.12	10.25	2.81	74.1683	28.1212	6.10738	7.03995	14.3553	44.08	48.05	47.71	46.7849	0.27	0.74	0.49	0.57346	0.0122574	2017	2	1088.42	99.02	1258.94
NIA_LDS19_69D	NIA_LDS19_4	2019-10-10 14:43:47	45.97	22.13	78.4013	-12.1457	37.4873	Mozambique	937.469	3.6122	44.2155	0.360716	487.315	1.82197	44.087	0.02699	1533.87	2.09045	88.3171	0.0849591	0.917037	1.43829	2.80551	0.368618	37.1551	5.38553	320	7.12	10.25	2.81	74.1683	28.1212	6.10738	7.03995	14.3553	44.08	48.05	47.71	46.7849	0.27	0.74	0.49	0.57346	0.0122574	2017	2	1088.42	99.02	1258.94
NIA_LDS19_70A	NIA_LDS19_4	2019-10-10 14:58:33	43.09	25.64	64.5295	-12.1449	37.4883	Mozambique	1671.77	5.71293	92.5439	0.417985	1221.62	3.92271	92.4153	0.0842591	1560.23	1.82625	75.12	0.107622	0.92967	1.43829	2.80551	0.368618	37.1551	5.38553	320	7.12	10.25	2.81	74.1683	28.1212	6.10738	7.03995	14.3553	44.08	48.05	47.71	46.7849	0.27	0.74	0.49	0.57346	0.0122574	2018	1	1088.42	99.02	1258.94
NIA_LDS19_70B	NIA_LDS19_4	2019-10-10 14:59:12	50.52	25.36	94.4599	-12.1449	37.4883	Mozambique	2391.44	5.8086	95.3922	0.442165	1941.29	4.01838	95.2637	0.108439	1611.19	1.21571	50.3202	0.0900062	0.953223	1.43829	2.80551	0.368618	37.1551	5.38553	320	7.12	10.25	2.81	74.1683	28.1212	6.10738	7.03995	14.3553	44.08	48.05	47.71	46.7849	0.27	0.74	0.49	0.57346	0.0122574	2018	1	1088.42	99.02	1258.94
NIA_LDS19_70C	NIA_LDS19_4	2019-10-10 14:59:49	51.37	23.33	101.183	-12.1449	37.4882	Mozambique	1586.17	4.65795	68.4925	0.403314	1136.02	2.86773	68.3639	0.0695878	1589.65	1.46277	60.8834	0.0973818	0.943237	1.43829	2.80551	0.368618	37.1551	5.38553	320	7.12	10.25	2.81	74.1683	28.1212	6.10738	7.03995	14.3553	44.08	48.05	47.71	46.7849	0.27	0.74	0.49	0.57346	0.0122574	2018	1	1088.42	99.02	1258.94
NIA_LDS19_70D	NIA_LDS19_4	2019-10-10 15:00:24	50.98	22.44	100.411	-12.145	37.4882	Mozambique	1260.57	4.57259	54.358	0.376434	810.416	2.78237	54.2295	0.0427081	1572.73	1.96826	66.9792	0.0828872	0.937281	1.43829	2.80551	0.368618	37.1551	5.38553	320	7.12	10.25	2.81	74.1683	28.1212	6.10738	7.03995	14.3553	44.08	48.05	47.71	46.7849	0.27	0.74	0.49	0.57346	0.0122574	2018	1	1088.42	99.02	1258.94
NIA_LDS19_71A	NIA_LDS19_4	2019-10-10 15:03:08	46.58	22.92	80.0562	-12.1451	37.4882	Mozambique	1534.85	3.85546	10.6264	0.346976	1084.7	2.06524	10.4979	0.0132495	1681.76	1.1672	10.3589	0.0205439	0.990415	1.43829	2.80551	0.368618	37.1551	5.38553	320	7.12	10.25	2.81	74.1683	28.1212	6.10738	7.03995	14.3553	44.08	48.05	47.71	46.7849	0.27	0.74	0.49	0.57346	0.0122574	2018	1	1088.42	99.02	1258.94
NIA_LDS19_71B	NIA_LDS19_4	2019-10-10 15:03:44	48.63	21.74	90.1451	-12.145	37.4881	Mozambique	560.66	2.23928	10.6357	0.346796	110.506	0.449061	10.5072	0.0130694	1524.86	2.25876	92.2759	0.180355	0.913173	1.43829	2.80551	0.368618	37.1551	5.38553	320	7.12	10.25	2.81	74.1683	28.1212	6.10738	7.03995	14.3553	44.08	48.05	47.71	46.7849	0.27	0.74	0.49	0.57346	0.0122574	2018	1	1088.42	99.02	1258.94
NIA_LDS19_71C	NIA_LDS19_4	2019-10-10 15:04:21	49.45	20.98	94.8285	-12.145	37.4881	Mozambique	530.99	1.89748	3.22591	0.341593	80.8359	0.107263	3.09737	0.00786635	1634.75	0.790709	39.8654	0.159092	0.963097	1.43829	2.80551	0.368618	37.1551	5.38553	320	7.12	10.25	2.81	74.1683	28.1212	6.10738	7.03995	14.3553	44.08	48.05	47.71	46.7849	0.27	0.74	0.49	0.57346	0.0122574	2018	1	1088.42	99.02	1258.94
NIA_LDS19_72A	NIA_LDS19_4	2019-10-10 15:24:18	40.77	24.69	57.8514	-12.1452	37.4879	Mozambique	959.958	3.58146	43.1549	0.372185	509.804	1.79124	43.0263	0.0384584	1544.62	1.9783	82.9677	0.11653	0.922171	1.43829	2.80551	0.368618	37.1551	5.38553	320	7.12	10.25	2.81	74.1683	28.1212	6.10738	7.03995	14.3553	44.08	48.05	47.71	46.7849	0.27	0.74	0.49	0.57346	0.0122574	2018	1	1088.42	99.02	1258.94
NIA_LDS19_72B	NIA_LDS19_4	2019-10-10 15:24:56	40.98	24.69	58.4984	-12.1452	37.4879	Mozambique	673.862	3.13667	28.0925	0.351187	223.708	1.34645	27.964	0.0174612	1469.77	3.22462	116.929	0.114728	0.888887	1.43829	2.80551	0.368618	37.1551	5.38553	320	7.12	10.25	2.81	74.1683	28.1212	6.10738	7.03995	14.3553	44.08	48.05	47.71	46.7849	0.27	0.74	0.49	0.57346	0.0122574	2018	1	1088.42	99.02	1258.94
NIA_LDS19_72C	NIA_LDS19_4	2019-10-10 15:27:23	41.26	23.56	60.2616	-12.1451	37.4878	Mozambique	824.328	2.7128	23.1765	0.360021	374.174	0.922578	23.048	0.0262947	1587.71	1.42699	62.2427	0.111582	0.941977	1.43829	2.80551	0.368618	37.1551	5.38553	320	7.12	10.25	2.81	74.1683	28.1212	6.10738	7.03995	14.3553	44.08	48.05	47.71	46.7849	0.27	0.74	0.49	0.57346	0.0122574	2018	1	1088.42	99.02	1258.94
NIA_LDS19_72D	NIA_LDS19_4	2019-10-10 15:32:57	39.87	22.6	56.6786	-12.1453	37.4876	Mozambique	587.881	2.2241	11.0174	0.347004	137.727	0.433879	10.8889	0.0132781	1555.24	1.78594	78.256	0.149949	0.926732	1.43829	2.80551	0.368618	37.1551	5.38553	320	7.12	10.25	2.81	74.1683	28.1212	6.10738	7.03995	14.3553	44.08	48.05	47.71	46.7849	0.27	0.74	0.49	0.57346	0.0122574	2018	1	1088.42	99.02	1258.94
NIA_LDS19_73B	NIA_LDS19_4	2019-10-10 15:34:11	39.3	22.76	54.8641	-12.1453	37.4876	Mozambique	587.724	2.35437	13.5965	0.34722	137.57	0.564149	13.468	0.0134938	1520.39	2.27272	94.7307	0.14914	0.91083	1.43829	2.80551	0.368618	37.1551	5.38553	320	7.12	10.25	2.81	74.1683	28.1212	6.10738	7.03995	14.3553	44.08	48.05	47.71	46.7849	0.27	0.74	0.49	0.57346	0.0122574	2018	1	1088.42	99.02	1258.94
NIA_LDS19_73C	NIA_LDS19_4	2019-10-10 15:34:47	38.73	23.2	52.9079	-12.1453	37.4875	Mozambique	630.5	2.46934	15.604	0.349262	180.345	0.679118	15.4755	0.0155362	1540.86	2.11506	84.1508	0.13275	0.920971	1.43829	2.80551	0.368618	37.1551	5.38553	320	7.12	10.25	2.81	74.1683	28.1212	6.10738	7.03995	14.3553	44.08	48.05	47.71	46.7849	0.27	0.74	0.49	0.57346	0.0122574	2018	1	1088.42	99.02	1258.94
NIA_LDS19_73D	NIA_LDS19_4	2019-10-10 15:36:49	40.12	23.53	56.7487	-12.1454	37.4875	Mozambique	1359.43	3.26678	37.5908	0.489267	909.276	1.47656	37.4623	0.155541	1627.68	0.963487	42.6801	0.278451	0.96043	1.43829	2.80551	0.368618	37.1551	5.38553	320	7.12	10.25	2.81	74.1683	28.1212	6.10738	7.03995	14.3553	44.08	48.05	47.71	46.7849	0.27	0.74	0.49	0.57346	0.0122574	2018	1	1088.42	99.02	1258.94
NIA_LDS19_74B	NIA_LDS19_4	2019-10-10 15:38:04	39.47	23.04	55.165	-12.1452	37.4875	Mozambique	640.973	2.30571	13.8977	0.351229	190.819	0.515487	13.7692	0.0175033	1569.07	1.54511	72.0586	0.143936	0.932698	1.43829	2.80551	0.368618	37.1551	5.38553	320	7.12	10.25	2.81	74.1683	28.1212	6.10738	7.03995	14.3553	44.08	48.05	47.71	46.7849	0.27	0.74	0.49	0.57346	0.0122574	2018	1	1088.42	99.02	1258.94
NIA_LDS19_74C	NIA_LDS19_4	2019-10-10 15:38:42	43.38	24.2	66.78	-12.1452	37.4875	Mozambique	1676.05	3.95723	54.672	0.40012	1225.9	2.16701	54.5435	0.0663941	1621.04	1.04453	45.9029	0.087801	0.957403	1.43829	2.80551	0.368618	37.1551	5.38553	320	7.12	10.25	2.81	74.1683	28.1212	6.10738	7.03995	14.3553	44.08	48.05	47.71	46.7849	0.27	0.74	0.49	0.57346	0.0122574	2018	1	1088.42	99.02	1258.94
NIA_LDS19_74D	NIA_LDS19_4	2019-10-10 15:39:17	41.66	22.78	62.1743	-12.1453	37.4874	Mozambique	1078.37	3.30751	40.4732	0.372211	628.215	1.51729	40.3447	0.0384849	1583.75	1.39434	64.7325	0.0970285	0.939654	1.43829	2.80551	0.368618	37.1551	5.38553	320	7.12	10.25	2.81	74.1683	28.1212	6.10738	7.03995	14.3553	44.08	48.05	47.71	46.7849	0.27	0.74	0.49	0.57346	0.0122574	2018	1	1088.42	99.02	1258.94
NIA_LDS19_75A	NIA_LDS19_4	2019-10-10 15:47:01	38.71	23.3	52.7822	-12.1452	37.4874	Mozambique	666.694	2.35383	16.1172	0.463163	216.54	0.563605	15.9887	0.129436	1567.02	1.48673	73.6386	0.936747	0.93124	1.43829	2.80551	0.368618	37.1551	5.38553	320	7.12	10.25	2.81	74.1683	28.1212	6.10738	7.03995	14.3553	44.08	48.05	47.71	46.7849	0.27	0.74	0.49	0.57346	0.0122574	2018	1	1088.42	99.02	1258.94
NIA_LDS19_75B	NIA_LDS19_4	2019-10-10 15:47:42	38.44	23.08	52.1696	-12.1452	37.4873	Mozambique	600.99	2.12195	8.26321	0.346733	150.836	0.331728	8.13467	0.0130071	1602.17	1.28442	54.992	0.13817	0.948829	1.43829	2.80551	0.368618	37.1551	5.38553	320	7.12	10.25	2.81	74.1683	28.1212	6.10738	7.03995	14.3553	44.08	48.05	47.71	46.7849	0.27	0.74	0.49	0.57346	0.0122574	2018	1	1088.42	99.02	1258.94
NIA_LDS19_75C	NIA_LDS19_4	2019-10-10 15:48:19	37.93	23.11	50.7327	-12.1451	37.4873	Mozambique	623.208	2.45248	15.9584	0.352064	173.054	0.662255	15.8298	0.0183378	1531.79	2.1368	89.1766	0.162328	0.916193	1.43829	2.80551	0.368618	37.1551	5.38553	320	7.12	10.25	2.81	74.1683	28.1212	6.10738	7.03995	14.3553	44.08	48.05	47.71	46.7849	0.27	0.74	0.49	0.57346	0.0122574	2018	1	1088.42	99.02	1258.94
NIA_LDS19_75D	NIA_LDS19_4	2019-10-10 15:48:56	37.97	23.27	50.7368	-12.1453	37.4872	Mozambique	923.508	2.81425	27.157	0.366632	473.354	1.02402	27.0285	0.0329061	1597.13	1.25947	58.041	0.111036	0.945984	1.43829	2.80551	0.368618	37.1551	5.38553	320	7.12	10.25	2.81	74.1683	28.1212	6.10738	7.03995	14.3553	44.08	48.05	47.71	46.7849	0.27	0.74	0.49	0.57346	0.0122574	2018	1	1088.42	99.02	1258.94
NIA_LDS19_76A	NIA_LDS19_4	2019-10-10 15:51:23	39.22	23.6	54.0354	-12.1453	37.4872	Mozambique	909.916	2.63447	24.3072	0.359763	459.762	0.844248	24.1787	0.026037	1606.86	1.07557	53.7818	0.0910054	0.950038	1.43829	2.80551	0.368618	37.1551	5.38553	320	7.12	10.25	2.81	74.1683	28.1212	6.10738	7.03995	14.3553	44.08	48.05	47.71	46.7849	0.27	0.74	0.49	0.57346	0.0122574	2018	1	1088.42	99.02	1258.94
NIA_LDS19_76B	NIA_LDS19_4	2019-10-10 15:52:05	45.12	23.77	73.48	-12.1452	37.4869	Mozambique	1788.44	4.75638	74.0125	0.399235	1338.28	2.96616	73.884	0.0655085	1599.92	1.29261	56.2158	0.078321	0.94768	1.43829	2.80551	0.368618	37.1551	5.38553	320	7.12	10.25	2.81	74.1683	28.1212	6.10738	7.03995	14.3553	44.08	48.05	47.71	46.7849	0.27	0.74	0.49	0.57346	0.0122574	2018	1	1088.42	99.02	1258.94
NIA_LDS19_76C	NIA_LDS19_4	2019-10-10 15:52:43	47.65	24.07	83.2547	-12.1451	37.4869	Mozambique	801.251	2.70494	24.4255	0.356866	351.097	0.914722	24.2969	0.0231399	1574.43	1.49523	69.3435	0.103774	0.935276	1.43829	2.80551	0.368618	37.1551	5.38553	320	7.12	10.25	2.81	74.1683	28.1212	6.10738	7.03995	14.3553	44.08	48.05	47.71	46.7849	0.27	0.74	0.49	0.57346	0.0122574	2018	1	1088.42	99.02	1258.94
NIA_LDS19_77A	NIA_LDS19_4	2019-10-10 15:55:45	44.42	23.48	71.1476	-12.1449	37.4869	Mozambique	1048.37	2.7761	30.1443	0.362231	598.214	0.985876	30.0158	0.028505	1612.21	0.968516	51.4838	0.076827	0.952222	1.43829	2.80551	0.368618	37.1551	5.38553	320	7.12	10.25	2.81	74.1683	28.1212	6.10738	7.03995	14.3553	44.08	48.05	47.71	46.7849	0.27	0.74	0.49	0.57346	0.0122574	2018	1	1088.42	99.02	1258.94
NIA_LDS19_77B	NIA_LDS19_4	2019-10-10 15:56:24	45.14	23.58	73.7389	-12.145	37.4869	Mozambique	1247.42	3.53208	45.6921	0.383261	797.266	1.74186	45.5636	0.0495345	1596.91	1.27178	58.0834	0.0992235	0.94594	1.43829	2.80551	0.368618	37.1551	5.38553	320	7.12	10.25	2.81	74.1683	28.1212	6.10738	7.03995	14.3553	44.08	48.05	47.71	46.7849	0.27	0.74	0.49	0.57346	0.0122574	2018	1	1088.42	99.02	1258.94
NIA_LDS19_77C	NIA_LDS19_4	2019-10-10 15:58:36	44.82	22.05	73.9875	-12.1451	37.4867	Mozambique	1860.57	4.38442	71.3202	0.39803	1410.42	2.5942	71.1916	0.0643042	1610.4	1.07972	51.7335	0.0734269	0.95195	1.43829	2.80551	0.368618	37.1551	5.38553	320	7.12	10.25	2.81	74.1683	28.1212	6.10738	7.03995	14.3553	44.08	48.05	47.71	46.7849	0.27	0.74	0.49	0.57346	0.0122574	2018	1	1088.42	99.02	1258.94
NIA_LDS19_78A	NIA_LDS19_4	2019-10-10 16:00:03	47.68	22.03	85.621	-12.1451	37.4873	Mozambique	1067.62	5.45512	79.6785	0.36674	617.466	3.6649	79.55	0.0330136	1464.88	3.16936	120.112	0.078327	0.885871	1.43829	2.80551	0.368618	37.1551	5.38553	320	7.12	10.25	2.81	74.1683	28.1212	6.10738	7.03995	14.3553	44.08	48.05	47.71	46.7849	0.27	0.74	0.49	0.57346	0.0122574	2018	1	1088.42	99.02	1258.94
NIA_LDS19_78B	NIA_LDS19_4	2019-10-10 16:00:37	45.31	21.31	76.5949	-12.1451	37.4874	Mozambique	1809.67	4.82874	77.0564	0.417071	1359.52	3.03852	76.9279	0.0833446	1597.51	1.30149	57.5307	0.0979414	0.946446	1.43829	2.80551	0.368618	37.1551	5.38553	320	7.12	10.25	2.81	74.1683	28.1212	6.10738	7.03995	14.3553	44.08	48.05	47.71	46.7849	0.27	0.74	0.49	0.57346	0.0122574	2018	1	1088.42	99.02	1258.94
NIA_LDS19_78C	NIA_LDS19_4	2019-10-10 16:00:39	45.36	21.3	76.8013	-12.1451	37.4874	Mozambique	1020.81	3.81352	49.6964	0.374546	570.654	2.0233	49.5678	0.0408194	1540.61	1.99113	85.1678	0.110209	0.920081	1.43829	2.80551	0.368618	37.1551	5.38553	320	7.12	10.25	2.81	74.1683	28.1212	6.10738	7.03995	14.3553	44.08	48.05	47.71	46.7849	0.27	0.74	0.49	0.57346	0.0122574	2018	1	1088.42	99.02	1258.94
NIA_LDS19_78D	NIA_LDS19_4	2019-10-10 16:01:14	47.02	21.15	83.7447	-12.1451	37.4874	Mozambique	1532.05	5.43104	79.7296	0.406732	1081.9	3.64082	79.601	0.0730062	1562.54	1.91674	73.1678	0.105447	0.931467	1.43829	2.80551	0.368618	37.1551	5.38553	320	7.12	10.25	2.81	74.1683	28.1212	6.10738	7.03995	14.3553	44.08	48.05	47.71	46.7849	0.27	0.74	0.49	0.57346	0.0122574	2018	1	1088.42	99.02	1258.94
NIA_LDS19_cal5	NIA_LDS19_5	calibration						Mozambique	4798.08	15.3727	103.54	1.17058	4339.36	13.5705	103.391	0.801346	1584.54	1.80631	24.0278	0.292635	0.976728
NIA_LDS19_79A	NIA_LDS19_5	2019-10-11 14:19:55	42.18	29.68	58.1876	-12.1459	37.472	Mozambique	1867.89	4.8625	70.8231	0.422314	1409.17	3.06026	70.6739	0.0530829	1636.11	1.29517	52.2231	0.0616355	0.952243	0.994621	4.44523	0.611765	18.7185	6.35733	320	6.33	12.01	2.99	67.0221	16.4184	0.820474	10.7346	4.80895	43.61	48.57	46.8655	47.5825	0.29	0.69	0.41	0.595952	0.0125246	2018	1	1088.42	99.02	1258.94
NIA_LDS19_79B	NIA_LDS19_5	2019-10-11 14:20:32	46.69	27.12	76.1185	-12.1456	37.4721	Mozambique	1166.55	2.81456	26.3701	0.394192	707.833	1.01232	26.2209	0.0249609	1664.13	0.867548	39.2339	0.0586875	0.964279	0.994621	4.44523	0.611765	18.7185	6.35733	320	6.33	12.01	2.99	67.0221	16.4184	0.820474	10.7346	4.80895	43.61	48.57	46.8655	47.5825	0.29	0.69	0.41	0.595952	0.0125246	2018	1	1088.42	99.02	1258.94
NIA_LDS19_79C	NIA_LDS19_5	2019-10-11 14:21:08	44.55	23.99	71.1491	-12.1455	37.472	Mozambique	719.725	4.35896	41.2995	0.363155	261.01	2.55673	41.1503	-0.00607644	1429.4	5.1039	143.426	-0.0332794	0.863813	0.994621	4.44523	0.611765	18.7185	6.35733	320	6.33	12.01	2.99	67.0221	16.4184	0.820474	10.7346	4.80895	43.61	48.57	46.8655	47.5825	0.29	0.69	0.41	0.595952	0.0125246	2018	1	1088.42	99.02	1258.94
NIA_LDS19_80A	NIA_LDS19_5	2019-10-11 14:25:36	41.46	22.14	62.0323	-12.1458	37.4717	Mozambique	774.718	2.62538	17.7531	0.362965	316.003	0.82314	17.6038	-0.00626584	1623.71	1.54174	57.5678	-0.0321977	0.947232	0.994621	4.44523	0.611765	18.7185	6.35733	320	6.33	12.01	2.99	67.0221	16.4184	0.820474	10.7346	4.80895	43.61	48.57	46.8655	47.5825	0.29	0.69	0.41	0.595952	0.0125246	2018	1	1088.42	99.02	1258.94
NIA_LDS19_80C	NIA_LDS19_5	2019-10-11 14:27:11	42.44	21	0	-12.1458	37.4717	Mozambique	635.335	2.24891	1.70221	0.347201	176.62	0.446668	1.55296	-0.0220299	1707.37	1.57396	9.5545	-0.212976	0.991284	0.994621	4.44523	0.611765	18.7185	6.35733	320	6.33	12.01	2.99	67.0221	16.4184	0.820474	10.7346	4.80895	43.61	48.57	46.8655	47.5825	0.29	0.69	0.41	0.595952	0.0125246	2018	1	1088.42	99.02	1258.94
NIA_LDS19_80D	NIA_LDS19_5	2019-10-11 14:27:51	45.17	20.85	76.4909	-12.1457	37.472	Mozambique	1093.65	3.90716	10.9195	0.252077	634.938	2.10492	10.7703	-0.117154	1686.5	2.03803	18.2069	-0.3112	0.98332	0.994621	4.44523	0.611765	18.7185	6.35733	320	6.33	12.01	2.99	67.0221	16.4184	0.820474	10.7346	4.80895	43.61	48.57	46.8655	47.5825	0.29	0.69	0.41	0.595952	0.0125246	2018	1	1088.42	99.02	1258.94
NIA_LDS19_81A	NIA_LDS19_5	2019-10-11 14:28:50	44.44	20.92	73.6038	-12.1459	37.4719	Mozambique	530.39	1.88636	1.20951	0.344845	71.6749	0.0841216	1.06026	-0.0243864	1706.39	0.730029	16.065	-0.580618	0.985423	0.994621	4.44523	0.611765	18.7185	6.35733	320	6.33	12.01	2.99	67.0221	16.4184	0.820474	10.7346	4.80895	43.61	48.57	46.8655	47.5825	0.29	0.69	0.41	0.595952	0.0125246	2018	1	1088.42	99.02	1258.94
NIA_LDS19_81B	NIA_LDS19_5	2019-10-11 14:29:26	44.39	21.11	73.2376	-12.1459	37.4719	Mozambique	1210.3	4.82841	56.9265	0.403215	751.588	3.02617	56.7773	0.0339833	1581.72	2.32148	76.0471	0.0715231	0.929763	0.994621	4.44523	0.611765	18.7185	6.35733	320	6.33	12.01	2.99	67.0221	16.4184	0.820474	10.7346	4.80895	43.61	48.57	46.8655	47.5825	0.29	0.69	0.41	0.595952	0.0125246	2018	1	1088.42	99.02	1258.94
NIA_LDS19_81C	NIA_LDS19_5	2019-10-11 14:30:57	44.82	20.59	75.3733	-12.1456	37.4718	Mozambique	1319.46	4.44345	52.7616	0.406739	860.743	2.64121	52.6124	0.0375073	1611.52	1.80254	62.6911	0.0702274	0.942397	0.994621	4.44523	0.611765	18.7185	6.35733	320	6.33	12.01	2.99	67.0221	16.4184	0.820474	10.7346	4.80895	43.61	48.57	46.8655	47.5825	0.29	0.69	0.41	0.595952	0.0125246	2018	1	1088.42	99.02	1258.94
NIA_LDS19_81D	NIA_LDS19_5	2019-10-11 14:31:34	43.8	19.83	72.1877	-12.1453	37.4719	Mozambique	914.02	2.99607	25.2698	0.373551	455.305	1.19384	25.1205	0.00432005	1624.49	1.55267	57.0428	0.0154146	0.947712	0.994621	4.44523	0.611765	18.7185	6.35733	320	6.33	12.01	2.99	67.0221	16.4184	0.820474	10.7346	4.80895	43.61	48.57	46.8655	47.5825	0.29	0.69	0.41	0.595952	0.0125246	2018	1	1088.42	99.02	1258.94
NIA_LDS19_82A	NIA_LDS19_5	2019-10-11 14:32:12	45.12	20.33	76.7959	-12.1452	37.4719	Mozambique	1081.59	3.52193	34.7783	0.384979	622.874	1.71969	34.6291	0.015748	1622.83	1.63322	57.421	0.0410327	0.947333	0.994621	4.44523	0.611765	18.7185	6.35733	320	6.33	12.01	2.99	67.0221	16.4184	0.820474	10.7346	4.80895	43.61	48.57	46.8655	47.5825	0.29	0.69	0.41	0.595952	0.0125246	2018	1	1088.42	99.02	1258.94
NIA_LDS19_82C	NIA_LDS19_5	2019-10-11 14:32:49	46.55	20.53	82.4127	-12.1451	37.4719	Mozambique	592.883	2.38699	12.267	0.35472	134.168	0.584756	12.1178	-0.0145109	1556.37	2.47263	89.4629	-0.16834	0.917164	0.994621	4.44523	0.611765	18.7185	6.35733	320	6.33	12.01	2.99	67.0221	16.4184	0.820474	10.7346	4.80895	43.61	48.57	46.8655	47.5825	0.29	0.69	0.41	0.595952	0.0125246	2018	1	1088.42	99.02	1258.94
NIA_LDS19_83A	NIA_LDS19_5	2019-10-11 14:36:24	44.74	19.67	75.933	-12.1449	37.4719	Mozambique	614.776	2.54845	14.0716	0.354815	156.061	0.746212	13.9224	-0.0144164	1555.44	2.71107	88.3137	-0.143696	0.918096	0.994621	4.44523	0.611765	18.7185	6.35733	320	6.33	12.01	2.99	67.0221	16.4184	0.820474	10.7346	4.80895	43.61	48.57	46.8655	47.5825	0.29	0.69	0.41	0.595952	0.0125246	2018	1	1088.42	99.02	1258.94
NIA_LDS19_83B	NIA_LDS19_5	2019-10-11 14:37:08	45.94	20.69	79.7288	-12.1449	37.4722	Mozambique	641.38	2.93024	20.0753	0.356896	182.664	1.128	19.926	-0.0123352	1516.98	3.41473	105.318	-0.102447	0.901644	0.994621	4.44523	0.611765	18.7185	6.35733	320	6.33	12.01	2.99	67.0221	16.4184	0.820474	10.7346	4.80895	43.61	48.57	46.8655	47.5825	0.29	0.69	0.41	0.595952	0.0125246	2018	1	1088.42	99.02	1258.94
NIA_LDS19_83C	NIA_LDS19_5	2019-10-11 14:37:48	44.2	19.87	73.6619	-12.1449	37.4722	Mozambique	752.399	3.71773	32.7993	0.367955	293.684	1.91549	32.6501	-0.00127625	1511.86	3.59446	106.973	-0.0065705	0.899949	0.994621	4.44523	0.611765	18.7185	6.35733	320	6.33	12.01	2.99	67.0221	16.4184	0.820474	10.7346	4.80895	43.61	48.57	46.8655	47.5825	0.29	0.69	0.41	0.595952	0.0125246	2018	1	1088.42	99.02	1258.94
NIA_LDS19_83D	NIA_LDS19_5	2019-10-11 14:40:10	44.09	20.1	73.0337	-12.1449	37.4721	Mozambique	734.214	3.76771	33.0683	0.369649	275.499	1.96547	32.9191	0.000417471	1496.27	3.89114	113.787	0.00226749	0.893265	0.994621	4.44523	0.611765	18.7185	6.35733	320	6.33	12.01	2.99	67.0221	16.4184	0.820474	10.7346	4.80895	43.61	48.57	46.8655	47.5825	0.29	0.69	0.41	0.595952	0.0125246	2018	1	1088.42	99.02	1258.94
NIA_LDS19_84A	NIA_LDS19_5	2019-10-11 14:40:48	42.13	19.43	66.4944	-12.145	37.4718	Mozambique	734.616	3.03151	20.6703	0.362696	275.901	1.22927	20.5211	-0.00653482	1580.82	2.56742	74.8317	-0.0374448	0.930771	0.994621	4.44523	0.611765	18.7185	6.35733	320	6.33	12.01	2.99	67.0221	16.4184	0.820474	10.7346	4.80895	43.61	48.57	46.8655	47.5825	0.29	0.69	0.41	0.595952	0.0125246	2018	1	1088.42	99.02	1258.94
NIA_LDS19_84B	NIA_LDS19_5	2019-10-11 14:41:26	41.84	19.71	65.2614	-12.1449	37.4715	Mozambique	498.727	1.83448	8.40864	0.495675	40.0119	0.0322384	8.25939	0.126444	1413.31	0.415091	185.675	4.4666	0.828896	0.994621	4.44523	0.611765	18.7185	6.35733	320	6.33	12.01	2.99	67.0221	16.4184	0.820474	10.7346	4.80895	43.61	48.57	46.8655	47.5825	0.29	0.69	0.41	0.595952	0.0125246	2018	1	1088.42	99.02	1258.94
NIA_LDS19_84D	NIA_LDS19_5	2019-10-11 14:45:19	39.8	20.76	57.8097	-12.145	37.4716	Mozambique	810.836	2.35616	2.47888	0.377458	352.121	0.553922	2.32963	0.0082264	1718.7	0.985544	7.23688	0.0401556	0.993427	0.994621	4.44523	0.611765	18.7185	6.35733	320	6.33	12.01	2.99	67.0221	16.4184	0.820474	10.7346	4.80895	43.61	48.57	46.8655	47.5825	0.29	0.69	0.41	0.595952	0.0125246	2018	1	1088.42	99.02	1258.94
NIA_LDS19_85A	NIA_LDS19_5	2019-10-11 14:46:03	38.78	20.71	54.7703	-12.145	37.4713	Mozambique	636.343	2.9601	15.4169	0.354639	177.627	1.15786	15.2677	-0.0145927	1549.65	3.68214	84.7721	-0.127318	0.92085	0.994621	4.44523	0.611765	18.7185	6.35733	320	6.33	12.01	2.99	67.0221	16.4184	0.820474	10.7346	4.80895	43.61	48.57	46.8655	47.5825	0.29	0.69	0.41	0.595952	0.0125246	2018	1	1088.42	99.02	1258.94
NIA_LDS19_85B	NIA_LDS19_5	2019-10-11 14:46:41	38.51	20.97	53.8032	-12.1448	37.4715	Mozambique	1094.57	5.92236	54.0496	0.378869	635.851	4.12013	53.9003	0.00963812	1551.71	3.66511	83.7152	0.0235222	0.921855	0.994621	4.44523	0.611765	18.7185	6.35733	320	6.33	12.01	2.99	67.0221	16.4184	0.820474	10.7346	4.80895	43.61	48.57	46.8655	47.5825	0.29	0.69	0.41	0.595952	0.0125246	2018	1	1088.42	99.02	1258.94
NIA_LDS19_85C	NIA_LDS19_5	2019-10-11 14:50:29	37.85	22.71	50.7763	-12.145	37.4717	Mozambique	2164.27	12.1171	144.578	0.432063	1705.55	10.3149	144.429	0.0628318	1554.53	3.42704	83.781	0.0572722	0.92193	0.994621	4.44523	0.611765	18.7185	6.35733	320	6.33	12.01	2.99	67.0221	16.4184	0.820474	10.7346	4.80895	43.61	48.57	46.8655	47.5825	0.29	0.69	0.41	0.595952	0.0125246	2018	1	1088.42	99.02	1258.94
NIA_LDS19_85D	NIA_LDS19_5	2019-10-11 14:51:21	38.24	22.71	51.8581	-12.1448	37.4716	Mozambique	462.755	1.80576	56.0355	0.380944	4.03985	0.00351932	55.8863	0.0117126	106.188	0.0337201	934.914	0.307887	0.0674138	0.994621	4.44523	0.611765	18.7185	6.35733	320	6.33	12.01	2.99	67.0221	16.4184	0.820474	10.7346	4.80895	43.61	48.57	46.8655	47.5825	0.29	0.69	0.41	0.595952	0.0125246	2018	1	1088.42	99.02	1258.94
NIA_LDS19_86A	NIA_LDS19_5	2019-10-11 14:52:01	38.71	22.92	53.0437	-12.1448	37.4716	Mozambique	1040.23	3.18819	32.3935	0.374016	581.515	1.38595	32.2442	0.00478441	1625.65	1.41233	57.3687	0.0133759	0.947464	0.994621	4.44523	0.611765	18.7185	6.35733	320	6.33	12.01	2.99	67.0221	16.4184	0.820474	10.7346	4.80895	43.61	48.57	46.8655	47.5825	0.29	0.69	0.41	0.595952	0.0125246	2018	1	1088.42	99.02	1258.94
NIA_LDS19_86B	NIA_LDS19_5	2019-10-11 14:52:36	42	23.23	62.9273	-12.1448	37.4716	Mozambique	1435.63	4.45247	58.432	0.399595	976.915	2.65023	58.2827	0.0303639	1616.34	1.59839	61.3725	0.0502417	0.943699	0.994621	4.44523	0.611765	18.7185	6.35733	320	6.33	12.01	2.99	67.0221	16.4184	0.820474	10.7346	4.80895	43.61	48.57	46.8655	47.5825	0.29	0.69	0.41	0.595952	0.0125246	2018	1	1088.42	99.02	1258.94
NIA_LDS19_86C	NIA_LDS19_5	2019-10-11 14:52:38	41.74	23.24	62.0648	-12.1448	37.4716	Mozambique	1616.2	4.64168	66.9907	0.415543	1157.48	2.83944	66.8415	0.0463118	1621.3	1.44978	59.5871	0.0648739	0.945406	0.994621	4.44523	0.611765	18.7185	6.35733	320	6.33	12.01	2.99	67.0221	16.4184	0.820474	10.7346	4.80895	43.61	48.57	46.8655	47.5825	0.29	0.69	0.41	0.595952	0.0125246	2018	1	1088.42	99.02	1258.94
NIA_LDS19_87A	NIA_LDS19_5	2019-10-11 15:00:53	40.04	21.27	58.1774	-12.1449	37.4721	Mozambique	843.065	3.09383	31.7073	0.371029	384.35	1.29159	31.558	0.00179746	1575.55	1.92997	82.3327	0.00736876	0.924123	0.994621	4.44523	0.611765	18.7185	6.35733	320	6.33	12.01	2.99	67.0221	16.4184	0.820474	10.7346	4.80895	43.61	48.57	46.8655	47.5825	0.29	0.69	0.41	0.595952	0.0125246	2018	1	1088.42	99.02	1258.94
NIA_LDS19_87B	NIA_LDS19_5	2019-10-11 15:01:30	42.85	20.73	67.9345	-12.145	37.4723	Mozambique	714.79	2.53316	15.625	0.377194	256.074	0.730921	15.4758	0.00796228	1614.1	1.6794	62.083	0.0501916	0.94301	0.994621	4.44523	0.611765	18.7185	6.35733	320	6.33	12.01	2.99	67.0221	16.4184	0.820474	10.7346	4.80895	43.61	48.57	46.8655	47.5825	0.29	0.69	0.41	0.595952	0.0125246	2018	1	1088.42	99.02	1258.94
NIA_LDS19_87C	NIA_LDS19_5	2019-10-11 15:02:07	45.58	20.26	78.6986	-12.1449	37.4722	Mozambique	505.922	1.95765	3.78956	0.350079	47.2069	0.155412	3.64031	-0.019152	1583.96	1.90083	77.7379	-0.642659	0.928407	0.994621	4.44523	0.611765	18.7185	6.35733	320	6.33	12.01	2.99	67.0221	16.4184	0.820474	10.7346	4.80895	43.61	48.57	46.8655	47.5825	0.29	0.69	0.41	0.595952	0.0125246	2018	1	1088.42	99.02	1258.94
NIA_LDS19_87D	NIA_LDS19_5	2019-10-11 15:04:16	42.2	19.03	67.0705	-12.1449	37.4722	Mozambique	547.11	2.63858	17.7248	0.356352	88.3945	0.836343	17.5755	-0.0128789	1379.22	4.7568	174.532	-0.200964	0.834146	0.994621	4.44523	0.611765	18.7185	6.35733	320	6.33	12.01	2.99	67.0221	16.4184	0.820474	10.7346	4.80895	43.61	48.57	46.8655	47.5825	0.29	0.69	0.41	0.595952	0.0125246	2018	1	1088.42	99.02	1258.94
NIA_LDS19_88A	NIA_LDS19_5	2019-10-11 15:04:53	43.72	19.06	72.5792	-12.1447	37.4724	Mozambique	479.456	2.02184	4.57282	0.351253	20.7405	0.219607	4.42357	-0.0179779	1356.5	5.23561	184.133	-1.1759	0.824211	0.994621	4.44523	0.611765	18.7185	6.35733	320	6.33	12.01	2.99	67.0221	16.4184	0.820474	10.7346	4.80895	43.61	48.57	46.8655	47.5825	0.29	0.69	0.41	0.595952	0.0125246	2018	1	1088.42	99.02	1258.94
NIA_LDS19_88B	NIA_LDS19_5	2019-10-11 15:05:30	42.1	18.87	66.8513	-12.1447	37.4726	Mozambique	564.696	2.77511	16.3759	0.352535	105.981	0.97287	16.2267	-0.016696	1438.65	4.81397	140.189	-0.226657	0.86722	0.994621	4.44523	0.611765	18.7185	6.35733	320	6.33	12.01	2.99	67.0221	16.4184	0.820474	10.7346	4.80895	43.61	48.57	46.8655	47.5825	0.29	0.69	0.41	0.595952	0.0125246	2018	1	1088.42	99.02	1258.94
NIA_LDS19_88C	NIA_LDS19_5	2019-10-11 15:06:08	40.77	18.94	62.2684	-12.1448	37.4726	Mozambique	587.244	2.02879	4.474	0.353758	128.529	0.226552	4.32475	-0.0154734	1667.77	1.07158	35.7153	-0.200794	0.967447	0.994621	4.44523	0.611765	18.7185	6.35733	320	6.33	12.01	2.99	67.0221	16.4184	0.820474	10.7346	4.80895	43.61	48.57	46.8655	47.5825	0.29	0.69	0.41	0.595952	0.0125246	2018	1	1088.42	99.02	1258.94
NIA_LDS19_88D	NIA_LDS19_5	2019-10-11 15:09:25	41.56	19.8	64.2344	-12.1446	37.4721	Mozambique	1706.29	4.34948	52.5178	0.416782	1247.57	2.54724	52.3686	0.0475503	1651.13	1.22887	44.1105	0.0629357	0.959715	0.994621	4.44523	0.611765	18.7185	6.35733	320	6.33	12.01	2.99	67.0221	16.4184	0.820474	10.7346	4.80895	43.61	48.57	46.8655	47.5825	0.29	0.69	0.41	0.595952	0.0125246	2018	1	1088.42	99.02	1258.94
NIA_LDS19_89A	NIA_LDS19_5	2019-10-11 15:10:02	41.64	19.48	64.7631	-12.1446	37.4718	Mozambique	596.093	2.06674	41.9743	0.402228	137.378	0.264502	41.8251	0.0329967	1293.49	0.907813	250.635	0.310704	0.766605	0.994621	4.44523	0.611765	18.7185	6.35733	320	6.33	12.01	2.99	67.0221	16.4184	0.820474	10.7346	4.80895	43.61	48.57	46.8655	47.5825	0.29	0.69	0.41	0.595952	0.0125246	2018	1	1088.42	99.02	1258.94
NIA_LDS19_89B	NIA_LDS19_5	2019-10-11 15:10:41	41.03	19.5	62.6954	-12.1445	37.4715	Mozambique	1187.6	6.14865	74.8882	0.378103	728.885	4.34641	74.739	0.00887148	1527.95	3.32124	99.7133	0.0185984	0.906998	0.994621	4.44523	0.611765	18.7185	6.35733	320	6.33	12.01	2.99	67.0221	16.4184	0.820474	10.7346	4.80895	43.61	48.57	46.8655	47.5825	0.29	0.69	0.41	0.595952	0.0125246	2018	1	1088.42	99.02	1258.94
NIA_LDS19_89C	NIA_LDS19_5	2019-10-11 15:11:18	41.13	19.72	62.8556	-12.1444	37.472	Mozambique	1180.19	4.80218	59.1265	0.384498	721.475	2.99994	58.9773	0.0152667	1571.03	2.3812	81.7344	0.0332458	0.924432	0.994621	4.44523	0.611765	18.7185	6.35733	320	6.33	12.01	2.99	67.0221	16.4184	0.820474	10.7346	4.80895	43.61	48.57	46.8655	47.5825	0.29	0.69	0.41	0.595952	0.0125246	2018	1	1088.42	99.02	1258.94
NIA_LDS19_89D	NIA_LDS19_5	2019-10-11 15:13:34	45.83	19.86	80.1116	-12.1442	37.472	Mozambique	1107.97	5.83357	73.4166	0.380717	649.255	4.03133	73.2673	0.0114859	1511.26	3.42054	108.541	0.0267374	0.898595	0.994621	4.44523	0.611765	18.7185	6.35733	320	6.33	12.01	2.99	67.0221	16.4184	0.820474	10.7346	4.80895	43.61	48.57	46.8655	47.5825	0.29	0.69	0.41	0.595952	0.0125246	2018	1	1088.42	99.02	1258.94
NIA_LDS19_90A	NIA_LDS19_5	2019-10-11 15:14:11	48.28	19.34	91.2919	-12.1443	37.4719	Mozambique	821.715	4.44723	50.8346	0.370281	363	2.645	50.6853	0.00105012	1467.15	3.89685	130.379	0.00424458	0.877478	0.994621	4.44523	0.611765	18.7185	6.35733	320	6.33	12.01	2.99	67.0221	16.4184	0.820474	10.7346	4.80895	43.61	48.57	46.8655	47.5825	0.29	0.69	0.41	0.595952	0.0125246	2018	1	1088.42	99.02	1258.94
NIA_LDS19_90B	NIA_LDS19_5	2019-10-11 15:14:48	49.8	19.38	98.449	-12.1441	37.4719	Mozambique	813.111	3.77121	39.3275	0.367303	354.396	1.96897	39.1783	-0.00192804	1518.51	3.0753	106.839	-0.00826176	0.900455	0.994621	4.44523	0.611765	18.7185	6.35733	320	6.33	12.01	2.99	67.0221	16.4184	0.820474	10.7346	4.80895	43.61	48.57	46.8655	47.5825	0.29	0.69	0.41	0.595952	0.0125246	2018	1	1088.42	99.02	1258.94
NIA_LDS19_90C	NIA_LDS19_5	2019-10-11 15:15:25	47.48	18.27	88.8481	-12.1441	37.472	Mozambique	957.873	4.80943	58.6172	0.373272	499.158	3.00719	58.4679	0.00404043	1506.12	3.30752	112.278	0.0121921	0.895148	0.994621	4.44523	0.611765	18.7185	6.35733	320	6.33	12.01	2.99	67.0221	16.4184	0.820474	10.7346	4.80895	43.61	48.57	46.8655	47.5825	0.29	0.69	0.41	0.595952	0.0125246	2018	1	1088.42	99.02	1258.94
NIA_LDS19_91A	NIA_LDS19_5	2019-10-11 15:20:35	54.13	16.93	125.406	-12.1441	37.4709	Mozambique	895.39	4.38445	46.5519	0.368652	436.675	2.58221	46.4027	-0.000579736	1522.71	3.28224	102.981	-0.0020217	0.903944	0.994621	4.44523	0.611765	18.7185	6.35733	320	6.33	12.01	2.99	67.0221	16.4184	0.820474	10.7346	4.80895	43.61	48.57	46.8655	47.5825	0.29	0.69	0.41	0.595952	0.0125246	2018	1	1088.42	99.02	1258.94
NIA_LDS19_91B	NIA_LDS19_5	2019-10-11 15:21:13	50.7	16.98	106.004	-12.1439	37.4706	Mozambique	520.798	2.27637	9.72618	0.351498	62.0824	0.47413	9.57693	-0.0177328	1445.4	4.0238	141.906	-0.412882	0.866355	0.994621	4.44523	0.611765	18.7185	6.35733	320	6.33	12.01	2.99	67.0221	16.4184	0.820474	10.7346	4.80895	43.61	48.57	46.8655	47.5825	0.29	0.69	0.41	0.595952	0.0125246	2018	1	1088.42	99.02	1258.94
NIA_LDS19_91C	NIA_LDS19_5	2019-10-11 15:21:50	47.34	16.92	89.6787	-12.1439	37.4703	Mozambique	1450.43	5.25602	64.1604	0.399729	991.715	3.45378	64.0112	0.0304977	1603.1	2.03512	65.8549	0.0493029	0.939368	0.994621	4.44523	0.611765	18.7185	6.35733	320	6.33	12.01	2.99	67.0221	16.4184	0.820474	10.7346	4.80895	43.61	48.57	46.8655	47.5825	0.29	0.69	0.41	0.595952	0.0125246	2018	1	1088.42	99.02	1258.94
NIA_LDS19_91D	NIA_LDS19_5	2019-10-11 15:25:29	45.94	17.17	83.2674	-12.1437	37.4708	Mozambique	1830.18	5.35393	74.6744	0.42747	1371.46	3.55169	74.5252	0.0582391	1626.12	1.53505	56.2376	0.0690576	0.948461	0.994621	4.44523	0.611765	18.7185	6.35733	320	6.33	12.01	2.99	67.0221	16.4184	0.820474	10.7346	4.80895	43.61	48.57	46.8655	47.5825	0.29	0.69	0.41	0.595952	0.0125246	2018	1	1088.42	99.02	1258.94
NIA_LDS19_92A	NIA_LDS19_5	2019-10-11 15:26:07	45.44	17.08	81.2522	-12.1437	37.4707	Mozambique	993.782	4.39289	48.4696	0.369915	535.067	2.59065	48.3204	0.000683811	1553.37	2.74155	89.2799	0.00198533	0.917173	0.994621	4.44523	0.611765	18.7185	6.35733	320	6.33	12.01	2.99	67.0221	16.4184	0.820474	10.7346	4.80895	43.61	48.57	46.8655	47.5825	0.29	0.69	0.41	0.595952	0.0125246	2018	1	1088.42	99.02	1258.94
NIA_LDS19_92B	NIA_LDS19_5	2019-10-11 15:26:44	45.04	17	0	-12.1436	37.4707	Mozambique	532.217	2.12776	6.28152	0.351014	73.5019	0.325519	6.13227	-0.0182174	1566.66	2.52914	83.1868	-0.388323	0.922995	0.994621	4.44523	0.611765	18.7185	6.35733	320	6.33	12.01	2.99	67.0221	16.4184	0.820474	10.7346	4.80895	43.61	48.57	46.8655	47.5825	0.29	0.69	0.41	0.595952	0.0125246	2018	1	1088.42	99.02	1258.94
NIA_LDS19_92C	NIA_LDS19_5	2019-10-11 15:27:20	48.57	17.66	94.5599	-12.1437	37.4706	Mozambique	806.445	2.6586	18.7952	0.364302	347.73	0.856362	18.6459	-0.00492879	1628.2	1.46165	55.5657	-0.02308	0.949107	0.994621	4.44523	0.611765	18.7185	6.35733	320	6.33	12.01	2.99	67.0221	16.4184	0.820474	10.7346	4.80895	43.61	48.57	46.8655	47.5825	0.29	0.69	0.41	0.595952	0.0125246	2018	1	1088.42	99.02	1258.94
NIA_LDS19_92D	NIA_LDS19_5	2019-10-11 15:31:15	45.17	17.49	79.738	-12.1437	37.4705	Mozambique	917.251	3.61828	39.754	0.376071	458.536	1.81604	39.6048	0.00683967	1565.01	2.25939	86.0298	0.0233458	0.920495	0.994621	4.44523	0.611765	18.7185	6.35733	320	6.33	12.01	2.99	67.0221	16.4184	0.820474	10.7346	4.80895	43.61	48.57	46.8655	47.5825	0.29	0.69	0.41	0.595952	0.0125246	2018	1	1088.42	99.02	1258.94
NIA_LDS19_93B	NIA_LDS19_5	2019-10-11 15:33:01	46.97	17.32	87.5901	-12.1443	37.4698	Mozambique	932.72	4.94634	60.7681	0.368627	474.005	3.1441	60.6188	-0.000604651	1487.2	3.59588	121.046	-0.00189724	0.886614	0.994621	4.44523	0.611765	18.7185	6.35733	320	6.33	12.01	2.99	67.0221	16.4184	0.820474	10.7346	4.80895	43.61	48.57	46.8655	47.5825	0.29	0.69	0.41	0.595952	0.0125246	2018	1	1088.42	99.02	1258.94
NIA_LDS19_93C	NIA_LDS19_5	2019-10-11 15:33:52	48.8	17.62	95.7024	-12.1443	37.4696	Mozambique	1122.32	5.56902	76.2306	0.404161	663.606	3.76678	76.0814	0.0349302	1511.78	3.12801	110.31	0.0795808	0.897144	0.994621	4.44523	0.611765	18.7185	6.35733	320	6.33	12.01	2.99	67.0221	16.4184	0.820474	10.7346	4.80895	43.61	48.57	46.8655	47.5825	0.29	0.69	0.41	0.595952	0.0125246	2018	1	1088.42	99.02	1258.94
NIA_LDS19_93D	NIA_LDS19_5	2019-10-11 15:34:27	49.24	18.19	97.1538	-12.1443	37.4694	Mozambique	1143.74	6.12176	86.9289	0.397063	685.021	4.31952	86.7797	0.0278322	1490.78	3.42663	120.195	0.0605741	0.887562	0.994621	4.44523	0.611765	18.7185	6.35733	320	6.33	12.01	2.99	67.0221	16.4184	0.820474	10.7346	4.80895	43.61	48.57	46.8655	47.5825	0.29	0.69	0.41	0.595952	0.0125246	2018	1	1088.42	99.02	1258.94
NIA_LDS19_94A	NIA_LDS19_5	2019-10-11 15:41:39	41.28	21.31	62.1009	-12.1444	37.4693	Mozambique	1473.21	9.85296	166.25	0.401948	1014.49	8.05072	166.101	0.0327165	1431.29	4.1403	149.144	0.0461607	0.859308	0.994621	4.44523	0.611765	18.7185	6.35733	320	6.33	12.01	2.99	67.0221	16.4184	0.820474	10.7346	4.80895	43.61	48.57	46.8655	47.5825	0.29	0.69	0.41	0.595952	0.0125246	2018	1	1088.42	99.02	1258.94
NIA_LDS19_94B	NIA_LDS19_5	2019-10-11 15:42:16	44.98	21.18	75.4318	-12.1441	37.4689	Mozambique	817.304	4.72219	53.6605	0.363748	358.588	2.91995	53.5112	-0.00548279	1449.4	4.30218	137.656	-0.0221628	0.87015	0.994621	4.44523	0.611765	18.7185	6.35733	320	6.33	12.01	2.99	67.0221	16.4184	0.820474	10.7346	4.80895	43.61	48.57	46.8655	47.5825	0.29	0.69	0.41	0.595952	0.0125246	2018	1	1088.42	99.02	1258.94
NIA_LDS19_94C	NIA_LDS19_5	2019-10-11 15:42:55	49.3	21.37	93.6573	-12.144	37.4687	Mozambique	805.276	4.5817	53.5196	0.365952	346.561	2.77946	53.3703	-0.00327912	1443.68	4.2206	141.498	-0.0136609	0.866551	0.994621	4.44523	0.611765	18.7185	6.35733	320	6.33	12.01	2.99	67.0221	16.4184	0.820474	10.7346	4.80895	43.61	48.57	46.8655	47.5825	0.29	0.69	0.41	0.595952	0.0125246	2018	1	1088.42	99.02	1258.94
NIA_LDS19_94D	NIA_LDS19_5	2019-10-11 15:43:34	45.72	20	0	-12.1437	37.4685	Mozambique	628.921	2.46583	15.4018	0.358881	170.206	0.663596	15.2526	-0.0103507	1560.34	2.21753	88.9907	-0.0948951	0.917758	0.994621	4.44523	0.611765	18.7185	6.35733	320	6.33	12.01	2.99	67.0221	16.4184	0.820474	10.7346	4.80895	43.61	48.57	46.8655	47.5825	0.29	0.69	0.41	0.595952	0.0125246	2018	1	1088.42	99.02	1258.94
NIA_LDS19_95A	NIA_LDS19_5	2019-10-11 15:46:13	46.38	17.66	84.6534	-12.1435	37.4692	Mozambique	650.002	1.94329	66.7254	0.364119	191.287	0.141052	66.5762	-0.00511269	1253.3	0.336875	277.617	-0.0335003	0.741816	0.994621	4.44523	0.611765	18.7185	6.35733	320	6.33	12.01	2.99	67.0221	16.4184	0.820474	10.7346	4.80895	43.61	48.57	46.8655	47.5825	0.29	0.69	0.41	0.595952	0.0125246	2018	1	1088.42	99.02	1258.94
NIA_LDS19_95B	NIA_LDS19_5	2019-10-11 15:46:50	62.8	17.47	187.032	-12.1428	37.4694	Mozambique	1097.89	8.01291	110.57	0.377184	639.175	6.21067	110.421	0.00795264	1410.36	4.99539	155.067	0.0175489	0.852693	0.994621	4.44523	0.611765	18.7185	6.35733	320	6.33	12.01	2.99	67.0221	16.4184	0.820474	10.7346	4.80895	43.61	48.57	46.8655	47.5825	0.29	0.69	0.41	0.595952	0.0125246	2018	1	1088.42	99.02	1258.94
NIA_LDS19_95C	NIA_LDS19_5	2019-10-11 15:47:27	61.37	16.76	176.702	-12.1427	37.4691	Mozambique	1148.77	5.89058	75.6729	0.381845	690.057	4.08834	75.5237	0.0126139	1517.94	3.27821	105.733	0.027749	0.901351	0.994621	4.44523	0.611765	18.7185	6.35733	320	6.33	12.01	2.99	67.0221	16.4184	0.820474	10.7346	4.80895	43.61	48.57	46.8655	47.5825	0.29	0.69	0.41	0.595952	0.0125246	2018	1	1088.42	99.02	1258.94
NIA_LDS19_95D	NIA_LDS19_5	2019-10-11 15:48:04	56.35	16.13	140.815	-12.1425	37.469	Mozambique	548.459	2.73148	16.2881	0.353185	89.7435	0.929246	16.1388	-0.0160467	1398.19	5.27735	160.027	-0.250022	0.847578	0.994621	4.44523	0.611765	18.7185	6.35733	320	6.33	12.01	2.99	67.0221	16.4184	0.820474	10.7346	4.80895	43.61	48.57	46.8655	47.5825	0.29	0.69	0.41	0.595952	0.0125246	2018	1	1088.42	99.02	1258.94
NIA_LDS19_96A	NIA_LDS19_5	2019-10-11 15:52:35	49.36	16.27	100.031	-12.1416	37.4687	Mozambique	2514.54	4.65831	74.5872	0.479739	2055.83	2.85608	74.438	0.110508	1665.9	0.843633	38.3897	0.0895543	0.965057	0.994621	4.44523	0.611765	18.7185	6.35733	320	6.33	12.01	2.99	67.0221	16.4184	0.820474	10.7346	4.80895	43.61	48.57	46.8655	47.5825	0.29	0.69	0.41	0.595952	0.0125246	2018	1	1088.42	99.02	1258.94
NIA_LDS19_96B	NIA_LDS19_5	2019-10-11 15:53:12	54.36	16.23	127.872	-12.1413	37.4685	Mozambique	1536.58	3.88348	51.7475	0.425328	1077.87	2.08124	51.5983	0.0560963	1641.69	1.1555	50.0172	0.085446	0.954316	0.994621	4.44523	0.611765	18.7185	6.35733	320	6.33	12.01	2.99	67.0221	16.4184	0.820474	10.7346	4.80895	43.61	48.57	46.8655	47.5825	0.29	0.69	0.41	0.595952	0.0125246	2017	2	1088.42	99.02	1258.94
NIA_LDS19_96C	NIA_LDS19_5	2019-10-11 15:53:49	52.84	16.44	118.5	-12.1413	37.4685	Mozambique	1104.33	3.21264	51.7475	0.425328	645.611	1.4104	51.5983	0.0560963	1586.63	1.26348	80.7043	0.13787	0.925993	0.994621	4.44523	0.611765	18.7185	6.35733	320	6.33	12.01	2.99	67.0221	16.4184	0.820474	10.7346	4.80895	43.61	48.57	46.8655	47.5825	0.29	0.69	0.41	0.595952	0.0125246	2017	2	1088.42	99.02	1258.94
NIA_LDS19_96D	NIA_LDS19_5	2019-10-11 15:54:28	50.31	16.23	104.918	-12.1412	37.4685	Mozambique	754.579	3.08079	26.8415	0.366117	295.864	1.27855	26.6922	-0.00311441	1556.75	2.45226	89.3862	-0.0163883	0.917248	0.994621	4.44523	0.611765	18.7185	6.35733	320	6.33	12.01	2.99	67.0221	16.4184	0.820474	10.7346	4.80895	43.61	48.57	46.8655	47.5825	0.29	0.69	0.41	0.595952	0.0125246	2017	2	1088.42	99.02	1258.94
NIA_LDS19_97A	NIA_LDS19_5	2019-10-11 15:57:26	47.48	16.26	91.0332	-12.1413	37.469	Mozambique	1115.47	5.78705	79.1687	0.387863	656.75	3.98481	79.0195	0.0186321	1501.26	3.32035	114.96	0.0425938	0.892603	0.994621	4.44523	0.611765	18.7185	6.35733	320	6.33	12.01	2.99	67.0221	16.4184	0.820474	10.7346	4.80895	43.61	48.57	46.8655	47.5825	0.29	0.69	0.41	0.595952	0.0125246	2017	2	1088.42	99.02	1258.94
NIA_LDS19_97B	NIA_LDS19_5	2019-10-11 15:58:04	55.26	17.51	131.481	-12.1412	37.469	Mozambique	783.468	3.99868	41.7603	0.365361	324.753	2.19644	41.611	-0.00386979	1486.11	3.66386	121.189	-0.0177099	0.886422	0.994621	4.44523	0.611765	18.7185	6.35733	320	6.33	12.01	2.99	67.0221	16.4184	0.820474	10.7346	4.80895	43.61	48.57	46.8655	47.5825	0.29	0.69	0.41	0.595952	0.0125246	2017	2	1088.42	99.02	1258.94
NIA_LDS19_97C	NIA_LDS19_5	2019-10-11 15:58:42	50.76	16.07	107.484	-12.1413	37.4691	Mozambique	1089.48	6.61517	86.1076	0.381413	630.768	4.81293	85.9583	0.0121816	1469.86	4.08824	127.482	0.0283884	0.880068	0.994621	4.44523	0.611765	18.7185	6.35733	320	6.33	12.01	2.99	67.0221	16.4184	0.820474	10.7346	4.80895	43.61	48.57	46.8655	47.5825	0.29	0.69	0.41	0.595952	0.0125246	2017	2	1088.42	99.02	1258.94
NIA_LDS19_97D	NIA_LDS19_5	2019-10-11 15:59:19	49.09	15.28	99.8587	-12.1413	37.4691	Mozambique	713.018	2.9522	22.3523	0.415456	254.303	1.14996	22.2031	0.0462252	1560.01	2.57146	86.6854	0.283586	0.919701	0.994621	4.44523	0.611765	18.7185	6.35733	320	6.33	12.01	2.99	67.0221	16.4184	0.820474	10.7346	4.80895	43.61	48.57	46.8655	47.5825	0.29	0.69	0.41	0.595952	0.0125246	2017	2	1088.42	99.02	1258.94
NIA_LDS19_98A	NIA_LDS19_5	2019-10-11 16:02:19	46.66	15	0	-12.141	37.469	Mozambique	810.45	3.23553	26.5794	0.369802	351.735	1.43329	26.4302	0.000571005	1582.05	2.34997	75.6593	0.00256847	0.930109	0.994621	4.44523	0.611765	18.7185	6.35733	320	6.33	12.01	2.99	67.0221	16.4184	0.820474	10.7346	4.80895	43.61	48.57	46.8655	47.5825	0.29	0.69	0.41	0.595952	0.0125246	2017	2	1088.42	99.02	1258.94
NIA_LDS19_98B	NIA_LDS19_5	2019-10-11 16:02:56	48.36	15.22	96.3413	-12.1409	37.4689	Mozambique	576.718	2.45078	13.3562	0.356341	118.003	0.648546	13.207	-0.0128905	1516.84	3.03884	108.046	-0.165709	0.899345	0.994621	4.44523	0.611765	18.7185	6.35733	320	6.33	12.01	2.99	67.0221	16.4184	0.820474	10.7346	4.80895	43.61	48.57	46.8655	47.5825	0.29	0.69	0.41	0.595952	0.0125246	2017	2	1088.42	99.02	1258.94
NIA_LDS19_98C	NIA_LDS19_5	2019-10-11 16:03:34	47.02	15.15	90.1172	-12.1413	37.4693	Mozambique	532.66	2.18553	8.28691	0.351582	73.945	0.383296	8.13766	-0.0176489	1521.46	2.8748	106.564	-0.363162	0.90086	0.994621	4.44523	0.611765	18.7185	6.35733	320	6.33	12.01	2.99	67.0221	16.4184	0.820474	10.7346	4.80895	43.61	48.57	46.8655	47.5825	0.29	0.69	0.41	0.595952	0.0125246	2017	2	1088.42	99.02	1258.94
NIA_LDS19_98D	NIA_LDS19_5	2019-10-11 16:04:11	47.11	15.02	90.6678	-12.1414	37.4694	Mozambique	551.631	2.31491	6.74875	0.411097	92.9159	0.512675	6.5995	0.0418653	1579.32	3.17645	71.3918	0.711645	0.933684	0.994621	4.44523	0.611765	18.7185	6.35733	320	6.33	12.01	2.99	67.0221	16.4184	0.820474	10.7346	4.80895	43.61	48.57	46.8655	47.5825	0.29	0.69	0.41	0.595952	0.0125246	2017	2	1088.42	99.02	1258.94
NIA_LDS19_cal6	NIA_LDS19_6	calibration						Mozambique	4810.94	15.2868	102.383	1.15308	4332.11	13.4519	102.207	0.822716	1585.08	1.79414	23.8008	0.301045	0.976951
NIA_LDS19_99A	NIA_LDS19_6	2019-10-12 14:14:19	39.3	21.8	55.546	-12.1381	37.4487	Mozambique	642.824	2.31861	11.2485	0.351527	163.994	0.483705	11.0734	0.0211578	1493.98	1.60627	64.2027	0.19276	0.936748	2.0798	2.6041	0.147751	41.7726	5.1924	500	6.1	18.76	3.14	78.5752	4.11255	9.07477	7.30815	6.94769	44.065	44.455	47.52	44.3809	0.325	0.595	0.385	0.472356	0.0106432	2017	2	1075.36	99.02	1258.94
NIA_LDS19_99B	NIA_LDS19_6	2019-10-12 14:15:04	39.13	20.59	55.8939	-12.1381	37.4489	Mozambique	809.697	3.07979	27.0751	0.3654	330.867	1.24489	26.8999	0.0350308	1468.33	2.01382	75.9764	0.155471	0.924812	2.0798	2.6041	0.147751	41.7726	5.1924	500	6.1	18.76	3.14	78.5752	4.11255	9.07477	7.30815	6.94769	44.065	44.455	47.52	44.3809	0.325	0.595	0.385	0.472356	0.0106432	2017	2	1075.36	99.02	1258.94
NIA_LDS19_99C	NIA_LDS19_6	2019-10-12 14:15:47	40.09	19.56	59.5996	-12.138	37.449	Mozambique	1059.31	1.92622	32.665	0.375258	580.48	0.0913197	32.4898	0.0448892	1529.73	0.0877226	54.4917	0.118303	0.946996	2.0798	2.6041	0.147751	41.7726	5.1924	500	6.1	18.76	3.14	78.5752	4.11255	9.07477	7.30815	6.94769	44.065	44.455	47.52	44.3809	0.325	0.595	0.385	0.472356	0.0106432	2017	2	1075.36	99.02	1258.94
NIA_LDS19_99D	NIA_LDS19_6	2019-10-12 14:17:23	38.58	18.91	55.4142	-12.138	37.4488	Mozambique	1146.72	4.7757	53.5621	0.375185	667.89	2.9408	53.3869	0.0448165	1466.53	2.35382	74.6068	0.0984133	0.925983	2.0798	2.6041	0.147751	41.7726	5.1924	500	6.1	18.76	3.14	78.5752	4.11255	9.07477	7.30815	6.94769	44.065	44.455	47.52	44.3809	0.325	0.595	0.385	0.472356	0.0106432	2017	2	1075.36	99.02	1258.94
NIA_LDS19_100A	NIA_LDS19_6	2019-10-12 14:18:00	41.05	19.04	63.1204	-12.1378	37.4487	Mozambique	1319.03	4.85662	54.5966	0.38578	840.196	3.02172	54.4215	0.0554112	1494.19	1.95885	61.5959	0.098549	0.939168	2.0798	2.6041	0.147751	41.7726	5.1924	500	6.1	18.76	3.14	78.5752	4.11255	9.07477	7.30815	6.94769	44.065	44.455	47.52	44.3809	0.325	0.595	0.385	0.472356	0.0106432	2017	2	1075.36	99.02	1258.94
NIA_LDS19_100B	NIA_LDS19_6	2019-10-12 14:20:00	40.02	18.09	60.4628	-12.1378	37.4488	Mozambique	842.824	3.51763	28.7327	0.476618	363.994	1.68273	28.5575	0.146249	1467.4	2.47281	73.271	0.589628	0.927252	2.0798	2.6041	0.147751	41.7726	5.1924	500	6.1	18.76	3.14	78.5752	4.11255	9.07477	7.30815	6.94769	44.065	44.455	47.52	44.3809	0.325	0.595	0.385	0.472356	0.0106432	2017	2	1075.36	99.02	1258.94
NIA_LDS19_100C	NIA_LDS19_6	2019-10-12 14:20:37	42.83	17.94	70.2521	-12.1379	37.4488	Mozambique	818.915	3.76234	32.5787	0.358449	340.085	1.92744	32.4035	0.0280801	1437	2.96873	87.14	0.118658	0.913008	2.0798	2.6041	0.147751	41.7726	5.1924	500	6.1	18.76	3.14	78.5752	4.11255	9.07477	7.30815	6.94769	44.065	44.455	47.52	44.3809	0.325	0.595	0.385	0.472356	0.0106432	2017	2	1075.36	99.02	1258.94
NIA_LDS19_101A	NIA_LDS19_6	2019-10-12 14:23:16	41.28	16.76	65.6917	-12.1378	37.4487	Mozambique	978.862	3.81905	36.533	0.40759	500.031	1.98415	36.3578	0.0772211	1479.89	2.14055	68.4834	0.228558	0.932218	2.0798	2.6041	0.147751	41.7726	5.1924	500	6.1	18.76	3.14	78.5752	4.11255	9.07477	7.30815	6.94769	44.065	44.455	47.52	44.3809	0.325	0.595	0.385	0.472356	0.0106432	2017	2	1075.36	99.02	1258.94
NIA_LDS19_101B	NIA_LDS19_6	2019-10-12 14:23:53	43.01	16.66	72.0213	-12.1376	37.4487	Mozambique	1658.65	4.99309	63.6063	0.420766	1179.82	3.15819	63.4311	0.0903972	1517.06	1.48029	51.9094	0.116244	0.94898	2.0798	2.6041	0.147751	41.7726	5.1924	500	6.1	18.76	3.14	78.5752	4.11255	9.07477	7.30815	6.94769	44.065	44.455	47.52	44.3809	0.325	0.595	0.385	0.472356	0.0106432	2017	2	1075.36	99.02	1258.94
NIA_LDS19_101C	NIA_LDS19_6	2019-10-12 14:24:29	45.94	16.69	83.75	-12.1375	37.4487	Mozambique	1507.65	6.37908	76.9478	0.410985	1028.82	4.54418	76.7726	0.0806164	1474.32	2.37372	70.0191	0.115533	0.93056	2.0798	2.6041	0.147751	41.7726	5.1924	500	6.1	18.76	3.14	78.5752	4.11255	9.07477	7.30815	6.94769	44.065	44.455	47.52	44.3809	0.325	0.595	0.385	0.472356	0.0106432	2017	2	1075.36	99.02	1258.94
NIA_LDS19_102A	NIA_LDS19_6	2019-10-12 14:32:41	46.19	15.22	86.3221	-12.1372	37.4487	Mozambique	1310.26	4.69218	52.8751	0.382502	831.43	2.85728	52.7	0.0521335	1497.31	1.87568	60.4021	0.0938925	0.940393	2.0798	2.6041	0.147751	41.7726	5.1924	500	6.1	18.76	3.14	78.5752	4.11255	9.07477	7.30815	6.94769	44.065	44.455	47.52	44.3809	0.325	0.595	0.385	0.472356	0.0106432	2017	2	1075.36	99.02	1258.94
NIA_LDS19_102B	NIA_LDS19_6	2019-10-12 14:33:44	44.31	15.1	78.4919	-12.1371	37.4486	Mozambique	818.242	3.45649	30.0959	0.391918	339.412	1.62159	29.9207	0.0615487	1452.33	2.52929	81.4828	0.263382	0.918987	2.0798	2.6041	0.147751	41.7726	5.1924	500	6.1	18.76	3.14	78.5752	4.11255	9.07477	7.30815	6.94769	44.065	44.455	47.52	44.3809	0.325	0.595	0.385	0.472356	0.0106432	2017	2	1075.36	99.02	1258.94
NIA_LDS19_102C	NIA_LDS19_6	2019-10-12 14:35:04	42.88	14.49	73.397	-12.1371	37.4483	Mozambique	717.985	2.65526	15.8123	0.351489	239.155	0.820356	15.6371	0.0211198	1494.28	1.86842	62.1822	0.131969	0.938628	2.0798	2.6041	0.147751	41.7726	5.1924	500	6.1	18.76	3.14	78.5752	4.11255	9.07477	7.30815	6.94769	44.065	44.455	47.52	44.3809	0.325	0.595	0.385	0.472356	0.0106432	2017	2	1075.36	99.02	1258.94
NIA_LDS19_103A	NIA_LDS19_6	2019-10-12 15:10:04	43.12	15.38	73.548	-12.137	37.449	Mozambique	791.124	3.04751	25.173	0.357432	312.293	1.21261	24.9979	0.0270634	1469.47	2.07989	74.8612	0.127353	0.925886	2.0798	2.6041	0.147751	41.7726	5.1924	500	6.1	18.76	3.14	78.5752	4.11255	9.07477	7.30815	6.94769	44.065	44.455	47.52	44.3809	0.325	0.595	0.385	0.472356	0.0106432	2017	2	1075.36	99.02	1258.94
NIA_LDS19_103B	NIA_LDS19_6	2019-10-12 15:10:42	44.9	14.26	81.7173	-12.1368	37.4489	Mozambique	814.765	4.61615	43.0294	0.355856	335.935	2.78125	42.8542	0.0254867	1378.84	4.16122	111.946	0.104617	0.886865	2.0798	2.6041	0.147751	41.7726	5.1924	500	6.1	18.76	3.14	78.5752	4.11255	9.07477	7.30815	6.94769	44.065	44.455	47.52	44.3809	0.325	0.595	0.385	0.472356	0.0106432	2017	2	1075.36	99.02	1258.94
NIA_LDS19_103C	NIA_LDS19_6	2019-10-12 15:11:19	44.12	14.11	78.6309	-12.1368	37.4487	Mozambique	747.084	3.95545	35.1489	0.350187	268.254	2.12055	34.9738	0.0198178	1377.15	3.96831	114.271	0.101747	0.884662	2.0798	2.6041	0.147751	41.7726	5.1924	500	6.1	18.76	3.14	78.5752	4.11255	9.07477	7.30815	6.94769	44.065	44.455	47.52	44.3809	0.325	0.595	0.385	0.472356	0.0106432	2017	2	1075.36	99.02	1258.94
NIA_LDS19_104A	NIA_LDS19_6	2019-10-12 15:15:29	45.28	14.09	83.494	-12.1367	37.4488	Mozambique	921.612	5.14428	51.9259	0.366354	442.782	3.30938	51.7507	0.0359847	1397.25	3.80672	103.934	0.113561	0.895354	2.0798	2.6041	0.147751	41.7726	5.1924	500	6.1	18.76	3.14	78.5752	4.11255	9.07477	7.30815	6.94769	44.065	44.455	47.52	44.3809	0.325	0.595	0.385	0.472356	0.0106432	2017	2	1075.36	99.02	1258.94
NIA_LDS19_104B	NIA_LDS19_6	2019-10-12 15:16:07	44.87	13.91	81.9243	-12.1366	37.4489	Mozambique	853.289	4.84719	45.3702	0.356399	374.459	3.01229	45.195	0.0260302	1389.11	4.07332	106.704	0.096569	0.892304	2.0798	2.6041	0.147751	41.7726	5.1924	500	6.1	18.76	3.14	78.5752	4.11255	9.07477	7.30815	6.94769	44.065	44.455	47.52	44.3809	0.325	0.595	0.385	0.472356	0.0106432	2017	2	1075.36	99.02	1258.94
NIA_LDS19_104C	NIA_LDS19_6	2019-10-12 15:16:44	42.46	13.8	72.3823	-12.1364	37.4489	Mozambique	793.194	3.00885	18.4878	0.348006	314.364	1.17395	18.3126	0.0176373	1503.37	2.04646	55.7364	0.0843517	0.944954	2.0798	2.6041	0.147751	41.7726	5.1924	500	6.1	18.76	3.14	78.5752	4.11255	9.07477	7.30815	6.94769	44.065	44.455	47.52	44.3809	0.325	0.595	0.385	0.472356	0.0106432	2017	2	1075.36	99.02	1258.94
NIA_LDS19_104D	NIA_LDS19_6	2019-10-12 15:17:19	44.15	14.14	78.7255	-12.1365	37.4488	Mozambique	834.578	4.01263	35.6738	0.357098	355.748	2.17773	35.4986	0.026729	1428.08	3.18666	90.6942	0.107306	0.909268	2.0798	2.6041	0.147751	41.7726	5.1924	500	6.1	18.76	3.14	78.5752	4.11255	9.07477	7.30815	6.94769	44.065	44.455	47.52	44.3809	0.325	0.595	0.385	0.472356	0.0106432	2017	2	1075.36	99.02	1258.94
NIA_LDS19_105A	NIA_LDS19_6	2019-10-12 15:19:56	43.17	14.74	74.2976	-12.1365	37.4492	Mozambique	1090.34	3.27435	27.6259	0.370249	611.51	1.43945	27.4507	0.0398799	1533.28	1.31563	43.8054	0.1	0.957038	2.0798	2.6041	0.147751	41.7726	5.1924	500	6.1	18.76	3.14	78.5752	4.11255	9.07477	7.30815	6.94769	44.065	44.455	47.52	44.3809	0.325	0.595	0.385	0.472356	0.0106432	2017	2	1075.36	99.02	1258.94
NIA_LDS19_105B	NIA_LDS19_6	2019-10-12 15:20:32	45.77	14.71	84.9986	-12.1366	37.4491	Mozambique	974.01	4.62519	49.867	0.373417	495.179	2.79029	49.6918	0.0430476	1430.04	2.93735	91.3331	0.124327	0.908801	2.0798	2.6041	0.147751	41.7726	5.1924	500	6.1	18.76	3.14	78.5752	4.11255	9.07477	7.30815	6.94769	44.065	44.455	47.52	44.3809	0.325	0.595	0.385	0.472356	0.0106432	2017	2	1075.36	99.02	1258.94
NIA_LDS19_105C	NIA_LDS19_6	2019-10-12 15:21:08	45.39	14.47	83.5951	-12.1365	37.449	Mozambique	1093.41	3.89294	37.1159	0.368957	614.58	2.05804	36.9407	0.0385881	1502.91	1.83454	57.4931	0.0943707	0.943301	2.0798	2.6041	0.147751	41.7726	5.1924	500	6.1	18.76	3.14	78.5752	4.11255	9.07477	7.30815	6.94769	44.065	44.455	47.52	44.3809	0.325	0.595	0.385	0.472356	0.0106432	2017	2	1075.36	99.02	1258.94
NIA_LDS19_106A	NIA_LDS19_6	2019-10-12 15:24:49	42.88	13.89	73.912	-12.1363	37.4489	Mozambique	975.893	6.63715	67.8241	0.358321	497.063	4.80225	67.6489	0.0279516	1360.7	4.792	117.861	0.0765221	0.880206	2.0798	2.6041	0.147751	41.7726	5.1924	500	6.1	18.76	3.14	78.5752	4.11255	9.07477	7.30815	6.94769	44.065	44.455	47.52	44.3809	0.325	0.595	0.385	0.472356	0.0106432	2017	2	1075.36	99.02	1258.94
NIA_LDS19_106B	NIA_LDS19_6	2019-10-12 15:25:26	44.6	14.2	80.5205	-12.1363	37.4488	Mozambique	868.834	3.17537	23.2547	0.42053	390.004	1.34047	23.0795	0.0901614	1503.79	1.88407	56.6373	0.347672	0.944129	2.0798	2.6041	0.147751	41.7726	5.1924	500	6.1	18.76	3.14	78.5752	4.11255	9.07477	7.30815	6.94769	44.065	44.455	47.52	44.3809	0.325	0.595	0.385	0.472356	0.0106432	2017	2	1075.36	99.02	1258.94
NIA_LDS19_106C	NIA_LDS19_6	2019-10-12 15:28:58	40.35	14.82	63.9907	-12.1363	37.4489	Mozambique	900.094	4.01	37.5919	0.361907	421.264	2.1751	37.4167	0.0315383	1449.12	2.72741	81.9169	0.108497	0.918425	2.0798	2.6041	0.147751	41.7726	5.1924	500	6.1	18.76	3.14	78.5752	4.11255	9.07477	7.30815	6.94769	44.065	44.455	47.52	44.3809	0.325	0.595	0.385	0.472356	0.0106432	2017	2	1075.36	99.02	1258.94
NIA_LDS19_107A	NIA_LDS19_6	2019-10-12 15:31:09	38.36	15.02	57.3881	-12.1365	37.4482	Mozambique	617.324	2.30046	8.74174	0.348533	138.494	0.46556	8.56654	0.0181637	1500.13	1.8382	59.0554	0.196758	0.941748	2.0798	2.6041	0.147751	41.7726	5.1924	500	6.1	18.76	3.14	78.5752	4.11255	9.07477	7.30815	6.94769	44.065	44.455	47.52	44.3809	0.325	0.595	0.385	0.472356	0.0106432	2017	2	1075.36	99.02	1258.94
NIA_LDS19_107B	NIA_LDS19_6	2019-10-12 15:31:44	37.93	15.16	55.9782	-12.1365	37.4483	Mozambique	620.947	2.66058	14.05	0.347193	142.117	0.82568	13.8748	0.0168236	1432.87	3.03455	89.0322	0.169633	0.911054	2.0798	2.6041	0.147751	41.7726	5.1924	500	6.1	18.76	3.14	78.5752	4.11255	9.07477	7.30815	6.94769	44.065	44.455	47.52	44.3809	0.325	0.595	0.385	0.472356	0.0106432	2017	2	1075.36	99.02	1258.94
NIA_LDS19_107C	NIA_LDS19_6	2019-10-12 15:32:30	38.1	15.73	56.1155	-12.1366	37.4489	Mozambique	548.11	2.29625	7.90018	0.347145	69.2802	0.461349	7.72498	0.0167758	1408.93	3.42004	99.9853	0.341189	0.899682	2.0798	2.6041	0.147751	41.7726	5.1924	500	6.1	18.76	3.14	78.5752	4.11255	9.07477	7.30815	6.94769	44.065	44.455	47.52	44.3809	0.325	0.595	0.385	0.472356	0.0106432	2017	2	1075.36	99.02	1258.94
NIA_LDS19_107D	NIA_LDS19_6	2019-10-12 15:33:05	37.8	15.79	55.1729	-12.1366	37.4489	Mozambique	500.336	1.9335	1.75738	0.3416	21.5063	0.0986037	1.58218	0.0112311	1474.88	2.46493	69.0564	0.770273	0.931473	2.0798	2.6041	0.147751	41.7726	5.1924	500	6.1	18.76	3.14	78.5752	4.11255	9.07477	7.30815	6.94769	44.065	44.455	47.52	44.3809	0.325	0.595	0.385	0.472356	0.0106432	2017	2	1075.36	99.02	1258.94
NIA_LDS19_108A	NIA_LDS19_6	2019-10-12 15:45:43	40.72	16.83	63.7201	-12.1365	37.4491	Mozambique	754.175	2.65477	20.4361	0.354363	275.345	0.81987	20.2609	0.0239935	1484.59	1.61137	69.5259	0.129376	0.93146	2.0798	2.6041	0.147751	41.7726	5.1924	500	6.1	18.76	3.14	78.5752	4.11255	9.07477	7.30815	6.94769	44.065	44.455	47.52	44.3809	0.325	0.595	0.385	0.472356	0.0106432	2017	2	1075.36	99.02	1258.94
NIA_LDS19_108B	NIA_LDS19_6	2019-10-12 15:46:49	39.17	16.12	59.1669	-12.1365	37.4491	Mozambique	632.405	2.60471	17.5076	0.351062	153.575	0.769806	17.3324	0.0206929	1416.17	2.58761	101.721	0.19083	0.898586	2.0798	2.6041	0.147751	41.7726	5.1924	500	6.1	18.76	3.14	78.5752	4.11255	9.07477	7.30815	6.94769	44.065	44.455	47.52	44.3809	0.325	0.595	0.385	0.472356	0.0106432	2017	2	1075.36	99.02	1258.94
NIA_LDS19_108C	NIA_LDS19_6	2019-10-12 15:47:50	39.87	16.05	61.4751	-12.1364	37.4494	Mozambique	680.582	2.69022	21.9519	0.352577	201.751	0.855318	21.7767	0.0222083	1427.31	2.20572	98.0507	0.157126	0.902578	2.0798	2.6041	0.147751	41.7726	5.1924	500	6.1	18.76	3.14	78.5752	4.11255	9.07477	7.30815	6.94769	44.065	44.455	47.52	44.3809	0.325	0.595	0.385	0.472356	0.0106432	2017	2	1075.36	99.02	1258.94
NIA_LDS19_109A	NIA_LDS19_6	2019-10-12 15:55:36	39.22	17.79	58.1446	-12.1364	37.4491	Mozambique	953.421	4.93203	54.4257	0.364153	474.591	3.09713	54.2505	0.0337844	1405.86	3.34427	102.278	0.100085	0.897416	2.0798	2.6041	0.147751	41.7726	5.1924	500	6.1	18.76	3.14	78.5752	4.11255	9.07477	7.30815	6.94769	44.065	44.455	47.52	44.3809	0.325	0.595	0.385	0.472356	0.0106432	2017	2	1075.36	99.02	1258.94
NIA_LDS19_109B	NIA_LDS19_6	2019-10-12 15:56:15	39.67	17.75	59.5906	-12.1363	37.4491	Mozambique	779.343	3.18358	24.8697	0.354149	300.513	1.34868	24.6945	0.0237804	1462.73	2.39294	76.4996	0.115758	0.924065	2.0798	2.6041	0.147751	41.7726	5.1924	500	6.1	18.76	3.14	78.5752	4.11255	9.07477	7.30815	6.94769	44.065	44.455	47.52	44.3809	0.325	0.595	0.385	0.472356	0.0106432	2017	2	1075.36	99.02	1258.94
NIA_LDS19_109C	NIA_LDS19_6	2019-10-12 15:58:17	42.36	16.72	69.565	-12.1362	37.4491	Mozambique	1180.08	3.10883	32.8211	0.372856	701.246	1.27393	32.6459	0.0424873	1534.09	1.01589	45.4535	0.0929543	0.955517	2.0798	2.6041	0.147751	41.7726	5.1924	500	6.1	18.76	3.14	78.5752	4.11255	9.07477	7.30815	6.94769	44.065	44.455	47.52	44.3809	0.325	0.595	0.385	0.472356	0.0106432	2017	2	1075.36	99.02	1258.94
NIA_LDS19_109D	NIA_LDS19_6	2019-10-12 15:58:59	43.38	16	0	-12.1362	37.4492	Mozambique	1977.76	4.06204	59.7839	0.416246	1498.93	2.22714	59.6088	0.0858767	1547.3	0.838036	39.1617	0.0886542	0.961753	2.0798	2.6041	0.147751	41.7726	5.1924	500	6.1	18.76	3.14	78.5752	4.11255	9.07477	7.30815	6.94769	44.065	44.455	47.52	44.3809	0.325	0.595	0.385	0.472356	0.0106432	2017	2	1075.36	99.02	1258.94
NIA_LDS19_110A	NIA_LDS19_6	2019-10-12 16:02:06	48.51	14.18	98.2602	-12.1361	37.4492	Mozambique	1065.76	3.61242	39.9433	0.366899	586.934	1.77752	39.7681	0.0365304	1493.13	1.64833	64.3875	0.0929381	0.936544	2.0798	2.6041	0.147751	41.7726	5.1924	500	6.1	18.76	3.14	78.5752	4.11255	9.07477	7.30815	6.94769	44.065	44.455	47.52	44.3809	0.325	0.595	0.385	0.472356	0.0106432	2017	2	1075.36	99.02	1258.94
NIA_LDS19_110B	NIA_LDS19_6	2019-10-12 16:02:47	52.02	14.47	116.534	-12.1359	37.4492	Mozambique	979.073	4.18134	43.0964	0.363105	500.243	2.34644	42.9212	0.0327362	1456.25	2.48991	79.5212	0.0953043	0.920979	2.0798	2.6041	0.147751	41.7726	5.1924	500	6.1	18.76	3.14	78.5752	4.11255	9.07477	7.30815	6.94769	44.065	44.455	47.52	44.3809	0.325	0.595	0.385	0.472356	0.0106432	2017	2	1075.36	99.02	1258.94
NIA_LDS19_110C	NIA_LDS19_6	2019-10-12 16:03:27	47.73	13.66	95.0518	-12.1357	37.4492	Mozambique	2446.06	4.91355	70.6849	0.445457	1967.23	3.07865	70.5097	0.115088	1553.24	0.886064	35.4315	0.0908745	0.965398	2.0798	2.6041	0.147751	41.7726	5.1924	500	6.1	18.76	3.14	78.5752	4.11255	9.07477	7.30815	6.94769	44.065	44.455	47.52	44.3809	0.325	0.595	0.385	0.472356	0.0106432	2017	2	1075.36	99.02	1258.94
NIA_LDS19_111A	NIA_LDS19_6	2019-10-12 16:09:34	47.65	12.41	96.0395	-12.1354	37.4495	Mozambique	782.471	4.11534	46.7167	0.358223	303.641	2.28044	46.5415	0.027854	1350.01	3.69587	131.696	0.123849	0.867094	2.0798	2.6041	0.147751	41.7726	5.1924	500	6.1	18.76	3.14	78.5752	4.11255	9.07477	7.30815	6.94769	44.065	44.455	47.52	44.3809	0.325	0.595	0.385	0.472356	0.0106432	2017	2	1075.36	99.02	1258.94
NIA_LDS19_111B	NIA_LDS19_6	2019-10-12 16:10:13	60.29	13.08	175.551	-12.1355	37.4501	Mozambique	1457.14	9.37447	141.368	0.393892	978.31	7.53957	141.192	0.0635229	1360.28	3.82136	124.945	0.0883306	0.873879	2.0798	2.6041	0.147751	41.7726	5.1924	500	6.1	18.76	3.14	78.5752	4.11255	9.07477	7.30815	6.94769	44.065	44.455	47.52	44.3809	0.325	0.595	0.385	0.472356	0.0106432	2017	2	1088.42	99.02	1258.94
NIA_LDS19_112A	NIA_LDS19_6	2019-10-12 16:14:21	48.95	11.38	103.727	-12.135	37.4498	Mozambique	2112.48	7.0788	111.753	0.426606	1633.65	5.2439	111.578	0.0962375	1491.19	1.74481	64.8196	0.087851	0.936067	2.0798	2.6041	0.147751	41.7726	5.1924	500	6.1	18.76	3.14	78.5752	4.11255	9.07477	7.30815	6.94769	44.065	44.455	47.52	44.3809	0.325	0.595	0.385	0.472356	0.0106432	2017	2	1075.36	99.02	1258.94
NIA_LDS19_112B	NIA_LDS19_6	2019-10-12 16:15:01	52.46	12.08	122.395	-12.1348	37.4496	Mozambique	1317.46	4.67763	59.4348	0.378324	838.631	2.84273	59.2597	0.0479555	1486.49	1.83675	66.8511	0.0850081	0.934001	2.0798	2.6041	0.147751	41.7726	5.1924	500	6.1	18.76	3.14	78.5752	4.11255	9.07477	7.30815	6.94769	44.065	44.455	47.52	44.3809	0.325	0.595	0.385	0.472356	0.0106432	2017	2	1075.36	99.02	1258.94
NIA_LDS19_112C	NIA_LDS19_6	2019-10-12 16:18:42	45.42	11.18	86.9443	-12.1344	37.4486	Mozambique	1289.15	4.19346	51.1145	0.366096	810.32	2.35856	50.9393	0.0357269	1501.38	1.59295	60.0681	0.0662001	0.940855	2.0798	2.6041	0.147751	41.7726	5.1924	500	6.1	18.76	3.14	78.5752	4.11255	9.07477	7.30815	6.94769	44.065	44.455	47.52	44.3809	0.325	0.595	0.385	0.472356	0.0106432	2017	2	1075.36	99.02	1258.94
NIA_LDS19_113B	NIA_LDS19_6	2019-10-12 16:20:39	45.88	11.42	88.7752	-12.1337	37.4485	Mozambique	783.664	3.19139	14.1066	0.400289	304.834	1.35649	13.9314	0.0699197	1518.48	2.46311	44.1669	0.348317	0.956296	2.0798	2.6041	0.147751	41.7726	5.1924	500	6.1	18.76	3.14	78.5752	4.11255	9.07477	7.30815	6.94769	44.065	44.455	47.52	44.3809	0.325	0.595	0.385	0.472356	0.0106432	2017	2	1075.36	99.02	1258.94
NIA_LDS19_113C	NIA_LDS19_6	2019-10-12 16:23:15	49.92	11.82	108.325	-12.1339	37.4489	Mozambique	1164.55	4.42362	56.8908	0.367096	685.72	2.58872	56.7156	0.0367268	1466.18	2.01765	77.1791	0.0785332	0.923609	2.0798	2.6041	0.147751	41.7726	5.1924	500	6.1	18.76	3.14	78.5752	4.11255	9.07477	7.30815	6.94769	44.065	44.455	47.52	44.3809	0.325	0.595	0.385	0.472356	0.0106432	2017	2	1075.36	99.02	1258.94
NIA_LDS19_114A	NIA_LDS19_6	2019-10-12 16:24:30	50.31	12.21	109.953	-12.1337	37.4491	Mozambique	670.459	2.87847	18.788	0.354519	191.629	1.04357	18.6128	0.0241502	1435.65	2.84991	88.7476	0.180941	0.911469	2.0798	2.6041	0.147751	41.7726	5.1924	500	6.1	18.76	3.14	78.5752	4.11255	9.07477	7.30815	6.94769	44.065	44.455	47.52	44.3809	0.325	0.595	0.385	0.472356	0.0106432	2017	2	1075.36	99.02	1258.94
NIA_LDS19_114B	NIA_LDS19_6	2019-10-12 16:25:10	50.49	11.55	111.771	-12.1337	37.449	Mozambique	1301.36	3.74804	44.3341	0.393223	822.53	1.91314	44.159	0.0628536	1519.42	1.28823	51.9159	0.116114	0.949049	2.0798	2.6041	0.147751	41.7726	5.1924	500	6.1	18.76	3.14	78.5752	4.11255	9.07477	7.30815	6.94769	44.065	44.455	47.52	44.3809	0.325	0.595	0.385	0.472356	0.0106432	2017	2	1075.36	99.02	1258.94
NIA_LDS19_114C	NIA_LDS19_6	2019-10-12 16:31:33	43.64	11.8	78.7615	-12.1334	37.4482	Mozambique	1591.66	4.30931	59.2217	0.406469	1112.83	2.47441	59.0465	0.0760999	1521.06	1.23285	51.3653	0.104024	0.949614	2.0798	2.6041	0.147751	41.7726	5.1924	500	6.1	18.76	3.14	78.5752	4.11255	9.07477	7.30815	6.94769	44.065	44.455	47.52	44.3809	0.325	0.595	0.385	0.472356	0.0106432	2017	2	1075.36	99.02	1258.94
NIA_LDS19_114D	NIA_LDS19_6	2019-10-12 16:32:16	46.66	12.1	91.6661	-12.1329	37.448	Mozambique	1355.65	5.54379	69.2693	0.387331	876.82	3.70889	69.0941	0.0569617	1469.24	2.26541	73.6851	0.0954539	0.926955	2.0798	2.6041	0.147751	41.7726	5.1924	500	6.1	18.76	3.14	78.5752	4.11255	9.07477	7.30815	6.94769	44.065	44.455	47.52	44.3809	0.325	0.595	0.385	0.472356	0.0106432	2017	2	1075.36	99.02	1258.94
NIA_LDS19_115A	NIA_LDS19_6	2019-10-12 16:32:54	44.63	11.7	82.9949	-12.1327	37.4479	Mozambique	755.726	2.56452	17.4916	0.352269	276.896	0.72962	17.3164	0.0219005	1503.61	1.44422	59.8456	0.118933	0.941143	2.0798	2.6041	0.147751	41.7726	5.1924	500	6.1	18.76	3.14	78.5752	4.11255	9.07477	7.30815	6.94769	44.065	44.455	47.52	44.3809	0.325	0.595	0.385	0.472356	0.0106432	2017	2	1075.36	99.02	1258.94
NIA_LDS19_115B	NIA_LDS19_6	2019-10-12 16:33:29	45.44	12.12	86.1124	-12.1327	37.4479	Mozambique	1587.48	4.29286	58.7637	0.389625	1108.65	2.45796	58.5885	0.0592562	1521.44	1.22958	51.1718	0.0813251	0.949806	2.0798	2.6041	0.147751	41.7726	5.1924	500	6.1	18.76	3.14	78.5752	4.11255	9.07477	7.30815	6.94769	44.065	44.455	47.52	44.3809	0.325	0.595	0.385	0.472356	0.0106432	2017	2	1075.36	99.02	1258.94
NIA_LDS19_115C	NIA_LDS19_6	2019-10-12 16:33:32	45.83	12.17	87.7989	-12.1327	37.4479	Mozambique	1958.69	6.28353	100.784	0.414854	1479.86	4.44863	100.609	0.0844852	1492.92	1.63592	64.5968	0.0852366	0.936342	2.0798	2.6041	0.147751	41.7726	5.1924	500	6.1	18.76	3.14	78.5752	4.11255	9.07477	7.30815	6.94769	44.065	44.455	47.52	44.3809	0.325	0.595	0.385	0.472356	0.0106432	2017	2	1075.36	99.02	1258.94
NIA_LDS19_116A	NIA_LDS19_6	2019-10-12 16:36:21	43.8	12.12	79.13	-12.1331	37.4485	Mozambique	1727.67	4.16393	49.6704	0.505415	1248.84	2.32903	49.4952	0.175046	1545.02	1.05032	38.9715	0.216576	0.961878	2.0798	2.6041	0.147751	41.7726	5.1924	500	6.1	18.76	3.14	78.5752	4.11255	9.07477	7.30815	6.94769	44.065	44.455	47.52	44.3809	0.325	0.595	0.385	0.472356	0.0106432	2017	2	1075.36	99.02	1258.94
NIA_LDS19_116B	NIA_LDS19_6	2019-10-12 16:37:11	45.97	12.29	88.3084	-12.1329	37.4485	Mozambique	1054.22	3.97202	45.7648	0.376921	575.387	2.13712	45.5896	0.046552	1471.68	1.99252	74.2125	0.119075	0.926584	2.0798	2.6041	0.147751	41.7726	5.1924	500	6.1	18.76	3.14	78.5752	4.11255	9.07477	7.30815	6.94769	44.065	44.455	47.52	44.3809	0.325	0.595	0.385	0.472356	0.0106432	2017	2	1075.36	99.02	1258.94
NIA_LDS19_116C	NIA_LDS19_6	2019-10-12 16:37:48	43.64	12.39	78.2346	-12.1329	37.4485	Mozambique	807.15	2.53346	15.726	0.353539	328.32	0.69856	15.5508	0.0231703	1530.77	1.18723	46.1447	0.108037	0.954777	2.0798	2.6041	0.147751	41.7726	5.1924	500	6.1	18.76	3.14	78.5752	4.11255	9.07477	7.30815	6.94769	44.065	44.455	47.52	44.3809	0.325	0.595	0.385	0.472356	0.0106432	2017	2	1075.36	99.02	1258.94
NIA_LDS19_116D	NIA_LDS19_6	2019-10-12 16:38:23	43.48	12.24	77.7199	-12.1329	37.4485	Mozambique	1206.68	4.85125	55.904	0.380588	727.85	3.01635	55.7288	0.050219	1473.06	2.22527	71.7821	0.101643	0.928879	2.0798	2.6041	0.147751	41.7726	5.1924	500	6.1	18.76	3.14	78.5752	4.11255	9.07477	7.30815	6.94769	44.065	44.455	47.52	44.3809	0.325	0.595	0.385	0.472356	0.0106432	2017	2	1075.36	99.02	1258.94
NIA_LDS19_117A	NIA_LDS19_6	2019-10-12 16:40:05	42.75	12.58	74.5287	-12.133	37.4485	Mozambique	965.94	4.99538	60.8378	0.3654	487.11	3.16048	60.6626	0.0350308	1392.34	3.29301	110.356	0.100138	0.889256	2.0798	2.6041	0.147751	41.7726	5.1924	500	6.1	18.76	3.14	78.5752	4.11255	9.07477	7.30815	6.94769	44.065	44.455	47.52	44.3809	0.325	0.595	0.385	0.472356	0.0106432	2017	2	1075.36	99.02	1258.94
NIA_LDS19_117B	NIA_LDS19_6	2019-10-12 16:40:40	42.36	12.9	72.7559	-12.133	37.4486	Mozambique	995.309	2.9414	28.9543	0.478885	516.479	1.1065	28.7791	0.148516	1517.37	1.18499	53.8113	0.436356	0.947219	2.0798	2.6041	0.147751	41.7726	5.1924	500	6.1	18.76	3.14	78.5752	4.11255	9.07477	7.30815	6.94769	44.065	44.455	47.52	44.3809	0.325	0.595	0.385	0.472356	0.0106432	2017	2	1075.36	99.02	1258.94
NIA_LDS19_117C	NIA_LDS19_6	2019-10-12 16:40:42	42.18	12.75	72.1966	-12.133	37.4486	Mozambique	985.585	4.13855	49.2502	0.364211	506.755	2.30365	49.075	0.0338419	1441.21	2.38818	88.8274	0.0962528	0.911709	2.0798	2.6041	0.147751	41.7726	5.1924	500	6.1	18.76	3.14	78.5752	4.11255	9.07477	7.30815	6.94769	44.065	44.455	47.52	44.3809	0.325	0.595	0.385	0.472356	0.0106432	2017	2	1075.36	99.02	1258.94
NIA_LDS19_118A	NIA_LDS19_6	2019-10-12 16:41:23	41.13	12.72	68.3363	-12.1328	37.4487	Mozambique	1009.33	3.05175	25.1747	0.357386	530.5	1.21685	24.9995	0.0270167	1530.08	1.27934	45.8898	0.0779272	0.954996	2.0798	2.6041	0.147751	41.7726	5.1924	500	6.1	18.76	3.14	78.5752	4.11255	9.07477	7.30815	6.94769	44.065	44.455	47.52	44.3809	0.325	0.595	0.385	0.472356	0.0106432	2017	2	1075.36	99.02	1258.94
NIA_LDS19_118B	NIA_LDS19_6	2019-10-12 16:41:58	40.09	12.77	64.6304	-12.1328	37.4487	Mozambique	885.312	2.47836	17.866	0.356553	406.482	0.643465	17.6908	0.0261842	1540.53	0.888945	42.6712	0.0992427	0.958293	2.0798	2.6041	0.147751	41.7726	5.1924	500	6.1	18.76	3.14	78.5752	4.11255	9.07477	7.30815	6.94769	44.065	44.455	47.52	44.3809	0.325	0.595	0.385	0.472356	0.0106432	2017	2	1075.36	99.02	1258.94
NIA_LDS19_118C	NIA_LDS19_6	2019-10-12 16:42:00	40.19	12.85	64.9158	-12.1328	37.4487	Mozambique	627.365	2.39305	14.0807	0.349547	148.535	0.558151	13.9055	0.0191781	1450.39	1.98667	86.4167	0.187279	0.914396	2.0798	2.6041	0.147751	41.7726	5.1924	500	6.1	18.76	3.14	78.5752	4.11255	9.07477	7.30815	6.94769	44.065	44.455	47.52	44.3809	0.325	0.595	0.385	0.472356	0.0106432	2017	2	1075.36	99.02	1258.94
NIA_LDS19_118D	NIA_LDS19_6	2019-10-12 16:42:35	40.42	13.07	65.5488	-12.1327	37.4487	Mozambique	798.044	2.30719	12.2012	0.455829	319.214	0.47229	12.026	0.12546	1550.79	0.836373	37.1834	0.609544	0.963694	2.0798	2.6041	0.147751	41.7726	5.1924	500	6.1	18.76	3.14	78.5752	4.11255	9.07477	7.30815	6.94769	44.065	44.455	47.52	44.3809	0.325	0.595	0.385	0.472356	0.0106432	2017	2	1075.36	99.02	1258.94
NIA_LDS19_cal7	NIA_LDS19_7	calibration						Mozambique	4900.86	15.4606	103.938	1.16782	4423.46	13.6386	103.698	0.828085	1585.49	1.78193	23.6554	0.296829	0.977094
NIA_LDS19_119A	NIA_LDS19_7	2019-10-13 14:12:20	45.61	27.02	72.1376	-12.1393	37.4077	Mozambique	1278.21	3.00074	31.0929	0.378716	800.806	1.17873	30.853	0.0389769	1488.66	0.798735	36.5024	0.072461	0.962902	6.22341	0	0	100	9.294	0				92.4738	33.0384			33.0384	42.64	47.0173	47.9989	42.64	0.385	0.646667	0.477059	0.385	0.00902908	2018	1	1075.36	99.02	1258.94
NIA_LDS19_119B	NIA_LDS19_7	2019-10-13 14:12:57	46.66	24.12	79.1311	-12.1391	37.4076	Mozambique	1619.57	2.58247	25.3764	0.369915	1142.17	0.760455	25.1364	0.0301757	1520.58	0.369041	21.2981	0.0401761	0.978466	6.22341	0	0	100	9.294	0				92.4738	33.0384			33.0384	42.64	47.0173	47.9989	42.64	0.385	0.646667	0.477059	0.385	0.00902908	2018	1	1075.36	99.02	1258.94
NIA_LDS19_119C	NIA_LDS19_7	2019-10-13 14:13:35	49.03	23.12	90.3465	-12.139	37.4075	Mozambique	1377.34	3.72562	46.8749	0.396792	899.935	1.90361	46.635	0.0570524	1463.96	1.1288	48.2821	0.0928156	0.950733	6.22341	0	0	100	9.294	0				92.4738	33.0384			33.0384	42.64	47.0173	47.9989	42.64	0.385	0.646667	0.477059	0.385	0.00902908	2018	1	1075.36	99.02	1258.94
NIA_LDS19_119D	NIA_LDS19_7	2019-10-13 14:14:12	46.6	22.08	81.011	-12.139	37.4073	Mozambique	1488.61	3.14052	34.8288	0.399296	1011.21	1.31851	34.5889	0.0595571	1496.6	0.711328	32.5807	0.0881517	0.966926	6.22341	0	0	100	9.294	0				92.4738	33.0384			33.0384	42.64	47.0173	47.9989	42.64	0.385	0.646667	0.477059	0.385	0.00902908	2018	1	1075.36	99.02	1258.94
NIA_LDS19_120A	NIA_LDS19_7	2019-10-13 14:16:36	48.45	19.84	91.5038	-12.1392	37.4073	Mozambique	1411.65	4.92098	66.8055	0.392417	934.249	3.09897	66.5656	0.0526778	1427.76	1.72635	64.7439	0.0805099	0.933489	6.22341	0	0	100	9.294	0				92.4738	33.0384			33.0384	42.64	47.0173	47.9989	42.64	0.385	0.646667	0.477059	0.385	0.00902908	2018	1	1075.36	99.02	1258.94
NIA_LDS19_120B	NIA_LDS19_7	2019-10-13 14:17:13	50.58	19.17	102.598	-12.1388	37.4072	Mozambique	1547.94	5.67461	70.3159	0.410311	1070.54	3.8526	70.076	0.0705719	1434.56	1.88188	59.7645	0.0945754	0.938563	6.22341	0	0	100	9.294	0				92.4738	33.0384			33.0384	42.64	47.0173	47.9989	42.64	0.385	0.646667	0.477059	0.385	0.00902908	2018	1	1075.36	99.02	1258.94
NIA_LDS19_120C	NIA_LDS19_7	2019-10-13 14:17:50	58.51	18	0	-12.1389	37.4072	Mozambique	1146.06	5.29116	65.6902	0.387945	668.655	3.46914	65.4503	0.0482054	1379.72	2.60935	85.9526	0.0994754	0.910843	6.22341	0	0	100	9.294	0				92.4738	33.0384			33.0384	42.64	47.0173	47.9989	42.64	0.385	0.646667	0.477059	0.385	0.00902908	2018	1	1075.36	99.02	1258.94
NIA_LDS19_120D	NIA_LDS19_7	2019-10-13 14:18:27	56.04	17.61	136.305	-12.139	37.4073	Mozambique	1181.57	4.68248	57.0436	0.389722	704.166	2.86046	56.8037	0.0499829	1409.92	2.08773	72.3856	0.100085	0.925354	6.22341	0	0	100	9.294	0				92.4738	33.0384			33.0384	42.64	47.0173	47.9989	42.64	0.385	0.646667	0.477059	0.385	0.00902908	2018	1	1075.36	99.02	1258.94
NIA_LDS19_121A	NIA_LDS19_7	2019-10-13 14:21:30	46.8	16.58	87.615	-12.1389	37.4073	Mozambique	1926.68	2.96757	30.2849	0.396654	1449.28	1.14556	30.045	0.0569145	1521.86	0.438491	20.0795	0.059769	0.97969	6.22341	0	0	100	9.294	0				92.4738	33.0384			33.0384	42.64	47.0173	47.9989	42.64	0.385	0.646667	0.477059	0.385	0.00902908	2018	1	1075.36	99.02	1258.94
NIA_LDS19_121B	NIA_LDS19_7	2019-10-13 14:22:19	54.3	18.14	124.596	-12.1386	37.4072	Mozambique	2024.33	4.09265	53.1909	0.43685	1546.93	2.27063	52.951	0.0971112	1495.51	0.800178	32.5799	0.0938896	0.966903	6.22341	0	0	100	9.294	0				92.4738	33.0384			33.0384	42.64	47.0173	47.9989	42.64	0.385	0.646667	0.477059	0.385	0.00902908	2018	1	1075.36	99.02	1258.94
NIA_LDS19_121C	NIA_LDS19_7	2019-10-13 14:22:56	58.22	18.26	149.909	-12.1385	37.4075	Mozambique	3754.88	5.09206	76.5901	0.484309	3277.48	3.27005	76.3501	0.14457	1516.26	0.551454	22.4803	0.0668872	0.977235	6.22341	0	0	100	9.294	0				92.4738	33.0384			33.0384	42.64	47.0173	47.9989	42.64	0.385	0.646667	0.477059	0.385	0.00902908	2018	1	1075.36	99.02	1258.94
NIA_LDS19_122A	NIA_LDS19_7	2019-10-13 14:25:33	51.4	14.26	113.32	-12.1387	37.4074	Mozambique	1143.98	3.7288	40.6819	0.394615	666.575	1.90679	40.442	0.054876	1446.05	1.50785	55.8372	0.119055	0.942799	6.22341	0	0	100	9.294	0				92.4738	33.0384			33.0384	42.64	47.0173	47.9989	42.64	0.385	0.646667	0.477059	0.385	0.00902908	2018	1	1075.36	99.02	1258.94
NIA_LDS19_122B	NIA_LDS19_7	2019-10-13 14:26:10	53.19	14.1	123.909	-12.1386	37.4074	Mozambique	1142.65	2.67286	18.5238	0.420517	665.245	0.850847	18.2839	0.0807776	1507.58	0.702863	26.3709	0.183071	0.973251	6.22341	0	0	100	9.294	0				92.4738	33.0384			33.0384	42.64	47.0173	47.9989	42.64	0.385	0.646667	0.477059	0.385	0.00902908	2018	1	1075.36	99.02	1258.94
NIA_LDS19_122C	NIA_LDS19_7	2019-10-13 14:26:48	50.34	13.9	107.996	-12.1386	37.4074	Mozambique	842.478	2.67748	19.8145	0.391844	365.073	0.855465	19.5746	0.0521051	1459.81	1.24693	49.8159	0.208366	0.94911	6.22341	0	0	100	9.294	0				92.4738	33.0384			33.0384	42.64	47.0173	47.9989	42.64	0.385	0.646667	0.477059	0.385	0.00902908	2018	1	1075.36	99.02	1258.94
NIA_LDS19_122D	NIA_LDS19_7	2019-10-13 14:27:25	47.48	13.61	93.914	-12.1386	37.4074	Mozambique	1273.66	2.54192	26.1248	0.400487	796.251	0.71991	25.8849	0.0607478	1501.91	0.494986	31.0741	0.114592	0.968515	6.22341	0	0	100	9.294	0				92.4738	33.0384			33.0384	42.64	47.0173	47.9989	42.64	0.385	0.646667	0.477059	0.385	0.00902908	2018	1	1075.36	99.02	1258.94
NIA_LDS19_123A	NIA_LDS19_7	2019-10-13 14:30:00	44.68	14.94	80.1559	-12.1386	37.4074	Mozambique	804.9	2.11046	8.95285	0.460964	327.495	0.288443	8.71294	0.121225	1511.62	0.485311	25.5953	0.559579	0.974085	6.22341	0	0	100	9.294	0				92.4738	33.0384			33.0384	42.64	47.0173	47.9989	42.64	0.385	0.646667	0.477059	0.385	0.00902908	2018	1	1075.36	99.02	1258.94
NIA_LDS19_123B	NIA_LDS19_7	2019-10-13 14:30:52	48.31	16.1	95.1022	-12.1386	37.4073	Mozambique	1433.23	3.1911	34.4496	0.418727	955.824	1.36909	34.2097	0.0789877	1493.25	0.779662	34.0142	0.123408	0.965446	6.22341	0	0	100	9.294	0				92.4738	33.0384			33.0384	42.64	47.0173	47.9989	42.64	0.385	0.646667	0.477059	0.385	0.00902908	2018	1	1075.36	99.02	1258.94
NIA_LDS19_123C	NIA_LDS19_7	2019-10-13 14:31:33	52.72	15.79	118.726	-12.1386	37.4074	Mozambique	1616.89	3.74128	48.3351	0.411909	1139.49	1.91927	48.0952	0.0721694	1481.52	0.909609	39.7976	0.0938384	0.959502	6.22341	0	0	100	9.294	0				92.4738	33.0384			33.0384	42.64	47.0173	47.9989	42.64	0.385	0.646667	0.477059	0.385	0.00902908	2018	1	1075.36	99.02	1258.94
NIA_LDS19_123D	NIA_LDS19_7	2019-10-13 14:32:10	50.52	15.02	107.546	-12.1386	37.4073	Mozambique	1744.89	3.40259	41.0295	0.419925	1267.49	1.58058	40.7896	0.0801856	1500.21	0.681939	30.7267	0.0949152	0.968822	6.22341	0	0	100	9.294	0				92.4738	33.0384			33.0384	42.64	47.0173	47.9989	42.64	0.385	0.646667	0.477059	0.385	0.00902908	2018	1	1075.36	99.02	1258.94
NIA_LDS19_124A	NIA_LDS19_7	2019-10-13 14:34:40	48.36	14.54	97.114	-12.1386	37.4074	Mozambique	1084.8	2.69065	20.9373	0.380554	607.397	0.868638	20.6974	0.0408152	1496	0.779861	32.4437	0.100533	0.967047	6.22341	0	0	100	9.294	0				92.4738	33.0384			33.0384	42.64	47.0173	47.9989	42.64	0.385	0.646667	0.477059	0.385	0.00902908	2018	1	1075.36	99.02	1258.94
NIA_LDS19_125A	NIA_LDS19_7	2019-10-13 14:39:35	48.8	15.2	98.5137	-12.1385	37.4075	Mozambique	1424.92	3.31166	34.7404	0.385292	947.515	1.48965	34.5005	0.0455524	1491.37	0.854677	34.5605	0.0717033	0.964868	6.22341	0	0	100	9.294	0				92.4738	33.0384			33.0384	42.64	47.0173	47.9989	42.64	0.385	0.646667	0.477059	0.385	0.00902908	2018	1	1075.36	99.02	1258.94
NIA_LDS19_125B	NIA_LDS19_7	2019-10-13 14:40:18	52.43	14.3	119.13	-12.1383	37.4074	Mozambique	1077.25	2.39512	16.4392	0.369616	599.848	0.573103	16.1993	0.029877	1510.48	0.52605	25.9613	0.0752386	0.973704	6.22341	0	0	100	9.294	0				92.4738	33.0384			33.0384	42.64	47.0173	47.9989	42.64	0.385	0.646667	0.477059	0.385	0.00902908	2018	1	1075.36	99.02	1258.94
NIA_LDS19_125C	NIA_LDS19_7	2019-10-13 14:40:54	53.94	14.4	128.045	-12.1383	37.4074	Mozambique	1311.39	3.04292	24.9566	0.381051	833.985	1.22091	24.7167	0.0413122	1502.89	0.801998	28.3477	0.0744523	0.971216	6.22341	0	0	100	9.294	0				92.4738	33.0384			33.0384	42.64	47.0173	47.9989	42.64	0.385	0.646667	0.477059	0.385	0.00902908	2018	1	1075.36	99.02	1258.94
NIA_LDS19_125D	NIA_LDS19_7	2019-10-13 14:41:31	52.34	14.37	118.511	-12.1382	37.4073	Mozambique	1409.89	3.84794	41.6556	0.442008	932.485	2.02593	41.4157	0.102269	1475.01	1.16814	41.694	0.16178	0.957474	6.22341	0	0	100	9.294	0				92.4738	33.0384			33.0384	42.64	47.0173	47.9989	42.64	0.385	0.646667	0.477059	0.385	0.00902908	2018	1	1075.36	99.02	1258.94
NIA_LDS19_126A	NIA_LDS19_7	2019-10-13 14:43:47	52.88	14.15	121.985	-12.1382	37.4073	Mozambique	1420.72	3.24151	31.142	0.417388	943.315	1.4195	30.9021	0.0776484	1497.62	0.821484	31.224	0.123284	0.96828	6.22341	0	0	100	9.294	0				92.4738	33.0384			33.0384	42.64	47.0173	47.9989	42.64	0.385	0.646667	0.477059	0.385	0.00902908	2018	1	1075.36	99.02	1258.94
NIA_LDS19_126B	NIA_LDS19_7	2019-10-13 14:44:24	61.25	13.87	181.832	-12.138	37.4073	Mozambique	1631.92	7.80132	98.1118	0.439469	1154.52	5.97931	97.8719	0.09973	1397.81	2.63888	75.4159	0.120754	0.921852	6.22341	0	0	100	9.294	0				92.4738	33.0384			33.0384	42.64	47.0173	47.9989	42.64	0.385	0.646667	0.477059	0.385	0.00902908	2018	1	1075.36	99.02	1258.94
NIA_LDS19_126C	NIA_LDS19_7	2019-10-13 14:45:03	62.84	14.53	194.048	-12.1379	37.4071	Mozambique	1543.58	6.17491	79.307	0.43801	1066.17	4.3529	79.0671	0.098271	1419.09	2.11194	66.9784	0.130809	0.93096	6.22341	0	0	100	9.294	0				92.4738	33.0384			33.0384	42.64	47.0173	47.9989	42.64	0.385	0.646667	0.477059	0.385	0.00902908	2018	1	1075.36	99.02	1258.94
NIA_LDS19_126D	NIA_LDS19_7	2019-10-13 14:45:40	58.22	14.16	157.428	-12.1378	37.4071	Mozambique	1408.93	5.29597	60.8174	0.46842	931.525	3.47396	60.5775	0.128681	1434.41	1.94995	59.3673	0.198163	0.93894	6.22341	0	0	100	9.294	0				92.4738	33.0384			33.0384	42.64	47.0173	47.9989	42.64	0.385	0.646667	0.477059	0.385	0.00902908	2018	1	1075.36	99.02	1258.94
NIA_LDS19_127A	NIA_LDS19_7	2019-10-13 14:47:57	52.18	13.69	118.521	-12.1378	37.4071	Mozambique	1125.03	4.50777	52.8622	0.388083	647.625	2.68576	52.6223	0.0483436	1408.6	2.12937	72.8436	0.105156	0.924852	6.22341	0	0	100	9.294	0				92.4738	33.0384			33.0384	42.64	47.0173	47.9989	42.64	0.385	0.646667	0.477059	0.385	0.00902908	2018	1	1075.36	99.02	1258.94
NIA_LDS19_127B	NIA_LDS19_7	2019-10-13 14:48:52	50.98	13.34	112.192	-12.1379	37.4071	Mozambique	692.661	2.64993	16.3362	0.364156	215.256	0.827919	16.0963	0.0244166	1419.57	1.99026	67.559	0.161033	0.930425	6.22341	0	0	100	9.294	0				92.4738	33.0384			33.0384	42.64	47.0173	47.9989	42.64	0.385	0.646667	0.477059	0.385	0.00902908	2018	1	1075.36	99.02	1258.94
NIA_LDS19_127C	NIA_LDS19_7	2019-10-13 14:49:42	49.74	14.29	104.353	-12.1378	37.4071	Mozambique	1728.89	4.74994	53.3139	0.428591	1251.49	2.92793	53.074	0.0888519	1477.08	1.25967	39.8672	0.104875	0.959317	6.22341	0	0	100	9.294	0				92.4738	33.0384			33.0384	42.64	47.0173	47.9989	42.64	0.385	0.646667	0.477059	0.385	0.00902908	2018	1	1075.36	99.02	1258.94
NIA_LDS19_128A	NIA_LDS19_7	2019-10-13 14:52:41	52.91	14.27	121.992	-12.1378	37.4073	Mozambique	1524.41	3.89313	43.8438	0.406212	1047.01	2.07112	43.6039	0.0664725	1480.54	1.06757	39.2423	0.0940034	0.960019	6.22341	0	0	100	9.294	0				92.4738	33.0384			33.0384	42.64	47.0173	47.9989	42.64	0.385	0.646667	0.477059	0.385	0.00902908	2018	1	1075.36	99.02	1258.94
NIA_LDS19_128B	NIA_LDS19_7	2019-10-13 14:53:17	56.56	15.16	143.871	-12.1377	37.4073	Mozambique	1353.45	2.84043	25.8535	0.388979	876.044	1.01841	25.6136	0.0492396	1505.5	0.63797	28.0145	0.0846252	0.971593	6.22341	0	0	100	9.294	0				92.4738	33.0384			33.0384	42.64	47.0173	47.9989	42.64	0.385	0.646667	0.477059	0.385	0.00902908	2018	1	1075.36	99.02	1258.94
NIA_LDS19_128C	NIA_LDS19_7	2019-10-13 14:53:56	63.04	14.75	195.316	-12.1376	37.4071	Mozambique	1738.43	4.09057	45.5237	0.418948	1261.03	2.26856	45.2837	0.0792085	1490.71	0.977551	34.0697	0.093642	0.965335	6.22341	0	0	100	9.294	0				92.4738	33.0384			33.0384	42.64	47.0173	47.9989	42.64	0.385	0.646667	0.477059	0.385	0.00902908	2018	1	1075.36	99.02	1258.94
NIA_LDS19_128D	NIA_LDS19_7	2019-10-13 14:54:31	54.89	14	0	-12.1377	37.4071	Mozambique	1502.31	7.48487	87.4791	0.420188	1024.91	5.66286	87.2392	0.0804493	1395.38	2.81038	75.5923	0.109537	0.921558	6.22341	0	0	100	9.294	0				92.4738	33.0384			33.0384	42.64	47.0173	47.9989	42.64	0.385	0.646667	0.477059	0.385	0.00902908	2018	1	1075.36	99.02	1258.94
NIA_LDS19_129A	NIA_LDS19_7	2019-10-13 15:11:03	44.34	18.68	75.2988	-12.1383	37.4082	Mozambique	3404.02	9.20204	157.971	0.478596	2926.62	7.38003	157.731	0.138857	1458.3	1.34048	50.0214	0.0691956	0.948861	6.22341	0	0	100	9.294	0				92.4738	33.0384			33.0384	42.64	47.0173	47.9989	42.64	0.385	0.646667	0.477059	0.385	0.00902908	2018	1	1075.36	99.02	1258.94
NIA_LDS19_129B	NIA_LDS19_7	2019-10-13 15:11:41	57.43	20.19	141.029	-12.1379	37.4081	Mozambique	2317.58	6.88506	93.9029	0.444323	1840.18	5.06305	93.663	0.104584	1461.44	1.46574	47.3422	0.083065	0.951566	6.22341	0	0	100	9.294	0				92.4738	33.0384			33.0384	42.64	47.0173	47.9989	42.64	0.385	0.646667	0.477059	0.385	0.00902908	2018	1	1075.36	99.02	1258.94
NIA_LDS19_129C	NIA_LDS19_7	2019-10-13 15:12:18	54.1	18.76	122.465	-12.1376	37.4081	Mozambique	1939.1	5.71406	73.5712	0.526667	1461.7	3.89205	73.3313	0.186928	1463.1	1.42009	46.7158	0.18712	0.952228	6.22341	0	0	100	9.294	0				92.4738	33.0384			33.0384	42.64	47.0173	47.9989	42.64	0.385	0.646667	0.477059	0.385	0.00902908	2018	1	1075.36	99.02	1258.94
NIA_LDS19_129D	NIA_LDS19_7	2019-10-13 15:12:55	52.59	16.12	117.514	-12.1373	37.4081	Mozambique	1389.35	4.84764	57.5261	0.404784	911.948	3.02562	57.2862	0.0650453	1440.12	1.74166	57.5752	0.102725	0.940895	6.22341	0	0	100	9.294	0				92.4738	33.0384			33.0384	42.64	47.0173	47.9989	42.64	0.385	0.646667	0.477059	0.385	0.00902908	2018	1	1075.36	99.02	1258.94
NIA_LDS19_130A	NIA_LDS19_7	2019-10-13 15:15:11	51.84	14.34	115.687	-12.1377	37.4082	Mozambique	3207.84	13.1125	227.233	0.520619	2730.44	11.2905	226.993	0.18088	1406.01	2.11929	74.3922	0.0931488	0.923246	6.22341	0	0	100	9.294	0				92.4738	33.0384			33.0384	42.64	47.0173	47.9989	42.64	0.385	0.646667	0.477059	0.385	0.00902908	2018	1	1075.36	99.02	1258.94
NIA_LDS19_130B	NIA_LDS19_7	2019-10-13 15:15:51	56.28	13.88	144.112	-12.1371	37.4078	Mozambique	590.813	2.4817	6.81186	0.488512	113.408	0.659683	6.57195	0.148772	1432.43	3.03729	52.83	1.87924	0.945225	6.22341	0	0	100	9.294	0				92.4738	33.0384			33.0384	42.64	47.0173	47.9989	42.64	0.385	0.646667	0.477059	0.385	0.00902908	2018	1	1075.36	99.02	1258.94
NIA_LDS19_130C	NIA_LDS19_7	2019-10-13 15:16:30	53.97	12.64	130.867	-12.1374	37.4082	Mozambique	613.299	2.23779	9.90903	0.3614	135.894	0.415775	9.66912	0.0216605	1429.41	1.59418	64.7295	0.227853	0.933574	6.22341	0	0	100	9.294	0				92.4738	33.0384			33.0384	42.64	47.0173	47.9989	42.64	0.385	0.646667	0.477059	0.385	0.00902908	2018	1	1075.36	99.02	1258.94
NIA_LDS19_130D	NIA_LDS19_7	2019-10-13 15:17:09	48.89	12.76	101.806	-12.1375	37.4085	Mozambique	877.332	2.52023	17.5461	0.370893	399.927	0.698217	17.3062	0.0311536	1479.46	0.941531	40.7457	0.115255	0.958522	6.22341	0	0	100	9.294	0				92.4738	33.0384			33.0384	42.64	47.0173	47.9989	42.64	0.385	0.646667	0.477059	0.385	0.00902908	2018	1	1075.36	99.02	1258.94
NIA_LDS19_131A	NIA_LDS19_7	2019-10-13 15:19:34	47.79	14.12	94.8319	-12.1373	37.4082	Mozambique	782.158	2.7832	20.1039	0.373414	304.753	0.96119	19.864	0.0336745	1437.61	1.65281	59.6371	0.158863	0.938808	6.22341	0	0	100	9.294	0				92.4738	33.0384			33.0384	42.64	47.0173	47.9989	42.64	0.385	0.646667	0.477059	0.385	0.00902908	2018	1	1075.36	99.02	1258.94
NIA_LDS19_131B	NIA_LDS19_7	2019-10-13 15:20:11	45.28	14.28	83.3093	-12.1372	37.4082	Mozambique	1410.51	6.52608	87.6432	0.411008	933.105	4.70406	87.4033	0.0712691	1386.28	2.5475	82.6429	0.105889	0.914353	6.22341	0	0	100	9.294	0				92.4738	33.0384			33.0384	42.64	47.0173	47.9989	42.64	0.385	0.646667	0.477059	0.385	0.00902908	2018	1	1075.36	99.02	1258.94
NIA_LDS19_131C	NIA_LDS19_7	2019-10-13 15:20:48	49.89	15.26	103.944	-12.1373	37.4082	Mozambique	1127.24	3.20656	33.4026	0.387711	649.834	1.38454	33.1627	0.047972	1465.07	1.13784	47.5841	0.108161	0.951445	6.22341	0	0	100	9.294	0				92.4738	33.0384			33.0384	42.64	47.0173	47.9989	42.64	0.385	0.646667	0.477059	0.385	0.00902908	2018	1	1075.36	99.02	1258.94
NIA_LDS19_131D	NIA_LDS19_7	2019-10-13 15:21:25	47.59	14.74	93.202	-12.1373	37.4082	Mozambique	1274	3.19811	30.5304	0.476808	796.596	1.37609	30.2905	0.137069	1487.82	0.936873	36.0061	0.256024	0.963368	6.22341	0	0	100	9.294	0				92.4738	33.0384			33.0384	42.64	47.0173	47.9989	42.64	0.385	0.646667	0.477059	0.385	0.00902908	2018	1	1075.36	99.02	1258.94
NIA_LDS19_132A	NIA_LDS19_7	2019-10-13 15:23:41	44.12	14.98	77.8344	-12.1371	37.4077	Mozambique	902.095	4.98495	50.905	0.458952	424.69	3.16294	50.6651	0.119212	1339.47	3.6364	101.701	0.376021	0.893416	6.22341	0	0	100	9.294	0				92.4738	33.0384			33.0384	42.64	47.0173	47.9989	42.64	0.385	0.646667	0.477059	0.385	0.00902908	2018	1	1075.36	99.02	1258.94
NIA_LDS19_132B	NIA_LDS19_7	2019-10-13 15:24:18	43.19	15.41	73.7906	-12.1369	37.4074	Mozambique	715.205	3.39468	25.1719	0.369659	237.8	1.57267	24.932	0.0299203	1362.67	3.28501	90.9272	0.171465	0.905105	6.22341	0	0	100	9.294	0				92.4738	33.0384			33.0384	42.64	47.0173	47.9989	42.64	0.385	0.646667	0.477059	0.385	0.00902908	2018	1	1075.36	99.02	1258.94
NIA_LDS19_132C	NIA_LDS19_7	2019-10-13 15:24:55	42.44	15.62	70.7799	-12.1367	37.4076	Mozambique	831.696	3.94196	33.7864	0.381547	354.291	2.11994	33.5465	0.0418083	1379.7	3.00934	83.1439	0.162824	0.913504	6.22341	0	0	100	9.294	0				92.4738	33.0384			33.0384	42.64	47.0173	47.9989	42.64	0.385	0.646667	0.477059	0.385	0.00902908	2018	1	1075.36	99.02	1258.94
NIA_LDS19_132D	NIA_LDS19_7	2019-10-13 15:25:32	41.64	15.69	67.8114	-12.1368	37.4075	Mozambique	964.591	6.21002	63.9624	0.39567	487.186	4.38801	63.7225	0.0559308	1317.08	4.3242	109.64	0.151216	0.884332	6.22341	0	0	100	9.294	0				92.4738	33.0384			33.0384	42.64	47.0173	47.9989	42.64	0.385	0.646667	0.477059	0.385	0.00902908	2018	1	1075.36	99.02	1258.94
NIA_LDS19_133B	NIA_LDS19_7	2019-10-13 15:29:56	41.28	16.92	65.5654	-12.1368	37.4073	Mozambique	649.761	1.85559	43.0784	0.385657	172.356	0.0335765	42.8385	0.0459183	1222.71	0.0868267	193.414	0.325771	0.800931	6.22341	0	0	100	9.294	0				92.4738	33.0384			33.0384	42.64	47.0173	47.9989	42.64	0.385	0.646667	0.477059	0.385	0.00902908	2018	1	1075.36	99.02	1258.94
NIA_LDS19_133C	NIA_LDS19_7	2019-10-13 15:30:39	42.33	17.09	69.1472	-12.1369	37.4073	Mozambique	968.967	4.71028	46.6848	0.382962	491.562	2.88827	46.4449	0.0432229	1380.57	2.95691	83.0186	0.121401	0.913672	6.22341	0	0	100	9.294	0				92.4738	33.0384			33.0384	42.64	47.0173	47.9989	42.64	0.385	0.646667	0.477059	0.385	0.00902908	2018	1	1075.36	99.02	1258.94
NIA_LDS19_134A	NIA_LDS19_7	2019-10-13 15:33:46	42.44	16.87	69.7313	-12.1368	37.4077	Mozambique	545.609	2.05455	4.97028	0.352309	68.2045	0.23254	4.73036	0.01257	1429.97	1.77719	63.1199	0.26356	0.935143	6.22341	0	0	100	9.294	0				92.4738	33.0384			33.0384	42.64	47.0173	47.9989	42.64	0.385	0.646667	0.477059	0.385	0.00902908	2018	1	1075.36	99.02	1258.94
NIA_LDS19_134B	NIA_LDS19_7	2019-10-13 15:34:23	43.35	17.14	72.886	-12.1371	37.4081	Mozambique	1368.4	5.09295	61.8794	0.473877	890.995	3.27094	61.6395	0.134137	1428.69	1.91186	62.904	0.215101	0.935296	6.22341	0	0	100	9.294	0				92.4738	33.0384			33.0384	42.64	47.0173	47.9989	42.64	0.385	0.646667	0.477059	0.385	0.00902908	2018	1	1075.36	99.02	1258.94
NIA_LDS19_134D	NIA_LDS19_7	2019-10-13 15:37:15	43.7	16.02	75.227	-12.1369	37.408	Mozambique	1460.57	3.82306	41.9636	0.501354	983.161	2.00104	41.7237	0.161615	1478.94	1.09725	39.9454	0.243129	0.959289	6.22341	0	0	100	9.294	0				92.4738	33.0384			33.0384	42.64	47.0173	47.9989	42.64	0.385	0.646667	0.477059	0.385	0.00902908	2018	1	1075.36	99.02	1258.94
NIA_LDS19_135A	NIA_LDS19_7	2019-10-13 15:37:52	51.31	17.21	108.938	-12.1368	37.4082	Mozambique	1969.05	4.29733	35.6303	0.396578	1491.65	2.47532	35.3904	0.0568385	1511.19	0.914124	22.819	0.0575872	0.976824	6.22341	0	0	100	9.294	0				92.4738	33.0384			33.0384	42.64	47.0173	47.9989	42.64	0.385	0.646667	0.477059	0.385	0.00902908	2018	1	1075.36	99.02	1258.94
NIA_LDS19_135B	NIA_LDS19_7	2019-10-13 15:38:30	59.5	16.44	162.691	-12.1367	37.4081	Mozambique	2497.54	6.20628	84.1879	0.475109	2020.14	4.38427	83.948	0.13537	1479.47	1.17042	39.1285	0.0991468	0.960102	6.22341	0	0	100	9.294	0				92.4738	33.0384			33.0384	42.64	47.0173	47.9989	42.64	0.385	0.646667	0.477059	0.385	0.00902908	2018	1	1075.36	99.02	1258.94
NIA_LDS19_135C	NIA_LDS19_7	2019-10-13 15:39:08	58.8	15.48	159.276	-12.1366	37.4081	Mozambique	2727.67	7.61436	116.314	0.495841	2250.27	5.79235	116.074	0.156102	1461.49	1.37132	47.9795	0.101391	0.950948	6.22341	0	0	100	9.294	0				92.4738	33.0384			33.0384	42.64	47.0173	47.9989	42.64	0.385	0.646667	0.477059	0.385	0.00902908	2018	1	1075.36	99.02	1258.94
NIA_LDS19_135D	NIA_LDS19_7	2019-10-13 15:41:40	51.47	11.6	117.239	-12.1366	37.4081	Mozambique	1993.24	4.43679	53.4334	0.425997	1515.84	2.61478	53.1935	0.0862576	1492.48	0.938452	33.3329	0.0849345	0.966098	6.22341	0	0	100	9.294	0				92.4738	33.0384			33.0384	42.64	47.0173	47.9989	42.64	0.385	0.646667	0.477059	0.385	0.00902908	2018	1	1075.36	99.02	1258.94
NIA_LDS19_136A	NIA_LDS19_7	2019-10-13 15:42:19	50.67	11.53	112.796	-12.136	37.4082	Mozambique	1268.35	3.81857	45.0864	0.479121	790.945	1.99656	44.8465	0.139382	1454.04	1.33793	52.4706	0.256251	0.946342	6.22341	0	0	100	9.294	0				92.4738	33.0384			33.0384	42.64	47.0173	47.9989	42.64	0.385	0.646667	0.477059	0.385	0.00902908	2018	1	1075.36	99.02	1258.94
NIA_LDS19_136B	NIA_LDS19_7	2019-10-13 15:42:54	52.53	12.18	122.674	-12.136	37.4082	Mozambique	1902.3	4.55517	62.3245	0.425608	1424.9	2.73316	62.0846	0.0858693	1477.91	1.03336	40.9834	0.0890705	0.958248	6.22341	0	0	100	9.294	0				92.4738	33.0384			33.0384	42.64	47.0173	47.9989	42.64	0.385	0.646667	0.477059	0.385	0.00902908	2018	1	1075.36	99.02	1258.94
NIA_LDS19_136C	NIA_LDS19_7	2019-10-13 15:42:56	52.31	12	0	-12.136	37.4081	Mozambique	1795.27	3.85782	49.772	0.467993	1317.87	2.0358	49.5321	0.128254	1489.68	0.838837	35.634	0.144985	0.963776	6.22341	0	0	100	9.294	0				92.4738	33.0384			33.0384	42.64	47.0173	47.9989	42.64	0.385	0.646667	0.477059	0.385	0.00902908	2018	1	1075.36	99.02	1258.94
NIA_LDS19_137A	NIA_LDS19_7	2019-10-13 15:45:42	47.08	12.28	93.4491	-12.1361	37.408	Mozambique	2408.15	7.84512	124.943	0.499118	1930.75	6.02311	124.703	0.159378	1438.69	1.636	59.1392	0.118768	0.93933	6.22341	0	0	100	9.294	0				92.4738	33.0384			33.0384	42.64	47.0173	47.9989	42.64	0.385	0.646667	0.477059	0.385	0.00902908	2018	1	1075.36	99.02	1258.94
NIA_LDS19_137B	NIA_LDS19_7	2019-10-13 15:46:19	50.01	13.72	106.466	-12.1356	37.4077	Mozambique	3111.71	9.11068	155.257	0.523526	2634.31	7.28867	155.017	0.183786	1449.34	1.46175	54.2804	0.101123	0.944425	6.22341	0	0	100	9.294	0				92.4738	33.0384			33.0384	42.64	47.0173	47.9989	42.64	0.385	0.646667	0.477059	0.385	0.00902908	2018	1	1075.36	99.02	1258.94
NIA_LDS19_137C	NIA_LDS19_7	2019-10-13 15:46:56	64.16	14.61	205.81	-12.1358	37.4076	Mozambique	1114.46	3.76417	39.9842	0.484789	637.054	1.94216	39.7443	0.145049	1442.37	1.60289	57.2705	0.328432	0.941276	6.22341	0	0	100	9.294	0				92.4738	33.0384			33.0384	42.64	47.0173	47.9989	42.64	0.385	0.646667	0.477059	0.385	0.00902908	2018	1	1075.36	99.02	1258.94
NIA_LDS19_137D	NIA_LDS19_7	2019-10-13 15:47:33	52.34	12.12	121.625	-12.1358	37.4084	Mozambique	1190.5	2.9748	32.5323	0.395243	713.098	1.15279	32.2924	0.055504	1477.14	0.870448	42.5727	0.114981	0.956677	6.22341	0	0	100	9.294	0				92.4738	33.0384			33.0384	42.64	47.0173	47.9989	42.64	0.385	0.646667	0.477059	0.385	0.00902908	2018	1	1075.36	99.02	1258.94
NIA_LDS19_138A	NIA_LDS19_7	2019-10-13 15:49:58	51.31	12	0	-12.1358	37.4082	Mozambique	712.631	2.06274	5.373	0.355687	235.226	0.240725	5.13309	0.0159476	1518.51	0.566466	21.0896	0.102957	0.978644	6.22341	0	0	100	9.294	0				92.4738	33.0384			33.0384	42.64	47.0173	47.9989	42.64	0.385	0.646667	0.477059	0.385	0.00902908	2018	1	1075.36	99.02	1258.94
NIA_LDS19_138B	NIA_LDS19_7	2019-10-13 15:50:38	46.21	11.34	90.3648	-12.1357	37.408	Mozambique	690.329	2.24409	8.70987	0.437098	212.924	0.422077	8.46996	0.0973592	1483.44	1.07191	37.5563	0.678347	0.961743	6.22341	0	0	100	9.294	0				92.4738	33.0384			33.0384	42.64	47.0173	47.9989	42.64	0.385	0.646667	0.477059	0.385	0.00902908	2018	1	1075.36	99.02	1258.94
NIA_LDS19_138C	NIA_LDS19_7	2019-10-13 15:51:15	44.04	11.83	80.3846	-12.1356	37.4079	Mozambique	495.613	1.88502	1.41854	0.35369	18.2085	0.0630086	1.17863	0.0139509	1436.45	1.81191	59.1767	1.10065	0.939205	6.22341	0	0	100	9.294	0				92.4738	33.0384			33.0384	42.64	47.0173	47.9989	42.64	0.385	0.646667	0.477059	0.385	0.00902908	2018	1	1075.36	99.02	1258.94
NIA_LDS19_138D	NIA_LDS19_7	2019-10-13 15:51:53	43.09	12.42	76.0018	-12.1357	37.4079	Mozambique	585.065	1.98333	0.431345	0.369722	107.66	0.161317	0.191431	0.0299826	1548.92	0.846005	1.75284	0.431392	0.998225	6.22341	0	0	100	9.294	0				92.4738	33.0384			33.0384	42.64	47.0173	47.9989	42.64	0.385	0.646667	0.477059	0.385	0.00902908	2018	1	1075.36	99.02	1258.94
NIA_LDS19_cal8	NIA_LDS19_8	calibration						Mozambique	4827.26	15.3774	103.957	1.16057	4350.7	13.5665	103.767	0.856272	1584.56	1.8011	24.0528	0.311882	0.976705
NIA_LDS19_139A	NIA_LDS19_8	2019-10-14 14:17:11	39.6	31.89	49.1618	-12.1226	37.2872	Mozambique	912.849	2.87372	30.681	0.367627	436.292	1.06282	30.4913	0.0633243	1558.15	1.3836	69.3051	0.226169	0.934678	1.73931	2.88356	0.509714	37.3307	5.7888	280	10.46	22.48	2.19	71.534	19.5135	5.79689	10.0717	11.336	44.23	47.85	44.605	46.301	0.35	0.685	0.55	0.55807	0.0120531	2018	1	1063.03	101.885	1078.6
NIA_LDS19_139B	NIA_LDS19_8	2019-10-14 14:17:50	38.9	29.93	48.7147	-12.1225	37.2873	Mozambique	599.292	2.22146	11.2952	0.349861	122.734	0.410554	11.1055	0.0455591	1520.39	1.85387	87.5559	0.564409	0.917024	1.73931	2.88356	0.509714	37.3307	5.7888	280	10.46	22.48	2.19	71.534	19.5135	5.79689	10.0717	11.336	44.23	47.85	44.605	46.301	0.35	0.685	0.55	0.55807	0.0120531	2018	1	1063.03	101.885	1078.6
NIA_LDS19_139C	NIA_LDS19_8	2019-10-14 14:18:34	38.36	28.41	48.3456	-12.1226	37.2874	Mozambique	863.761	2.10726	7.55572	0.348184	387.204	0.296358	7.36601	0.0438822	1655.77	0.461954	20.0471	0.187663	0.981332	1.73931	2.88356	0.509714	37.3307	5.7888	280	10.46	22.48	2.19	71.534	19.5135	5.79689	10.0717	11.336	44.23	47.85	44.605	46.301	0.35	0.685	0.55	0.55807	0.0120531	2018	1	1063.03	101.885	1078.6
NIA_LDS19_139D	NIA_LDS19_8	2019-10-14 14:19:18	38.1	27.76	48.1047	-12.1226	37.2873	Mozambique	689.929	2.95501	26.0255	0.34924	213.372	1.14411	25.8358	0.0449382	1463.76	2.861	112.8	0.308303	0.891994	1.73931	2.88356	0.509714	37.3307	5.7888	280	10.46	22.48	2.19	71.534	19.5135	5.79689	10.0717	11.336	44.23	47.85	44.605	46.301	0.35	0.685	0.55	0.55807	0.0120531	2018	1	1063.03	101.885	1078.6
NIA_LDS19_140A	NIA_LDS19_8	2019-10-14 14:25:03	38.98	26.49	51.3263	-12.1225	37.2871	Mozambique	575.752	1.99913	4.71409	0.342081	99.1951	0.18823	4.52438	0.0377785	1601.5	1.10776	46.4894	0.609975	0.956379	1.73931	2.88356	0.509714	37.3307	5.7888	280	10.46	22.48	2.19	71.534	19.5135	5.79689	10.0717	11.336	44.23	47.85	44.605	46.301	0.35	0.685	0.55	0.55807	0.0120531	2018	1	1063.03	101.885	1078.6
NIA_LDS19_140B	NIA_LDS19_8	2019-10-14 14:25:40	37.88	24.73	49.5296	-12.1226	37.2871	Mozambique	993.642	3.84963	41.053	0.369124	517.085	2.03873	40.8632	0.0648215	1534.25	2.20503	77.1656	0.192346	0.926762	1.73931	2.88356	0.509714	37.3307	5.7888	280	10.46	22.48	2.19	71.534	19.5135	5.79689	10.0717	11.336	44.23	47.85	44.605	46.301	0.35	0.685	0.55	0.55807	0.0120531	2018	1	1063.03	101.885	1078.6
NIA_LDS19_140C	NIA_LDS19_8	2019-10-14 14:26:19	40.85	25.35	57.588	-12.1227	37.2868	Mozambique	1433.77	4.04785	48.4408	0.392918	957.214	2.23694	48.2511	0.0886154	1590.51	1.35489	51.026	0.147254	0.952011	1.73931	2.88356	0.509714	37.3307	5.7888	280	10.46	22.48	2.19	71.534	19.5135	5.79689	10.0717	11.336	44.23	47.85	44.605	46.301	0.35	0.685	0.55	0.55807	0.0120531	2018	1	1063.03	101.885	1078.6
NIA_LDS19_141A	NIA_LDS19_8	2019-10-14 14:31:10	39.57	23.31	55.2662	-12.1227	37.2873	Mozambique	770.028	2.12605	11.1713	0.362748	293.471	0.315147	10.9816	0.0584458	1621.14	0.634586	38.6081	0.322879	0.96393	1.73931	2.88356	0.509714	37.3307	5.7888	280	10.46	22.48	2.19	71.534	19.5135	5.79689	10.0717	11.336	44.23	47.85	44.605	46.301	0.35	0.685	0.55	0.55807	0.0120531	2018	1	1063.03	101.885	1078.6
NIA_LDS19_141B	NIA_LDS19_8	2019-10-14 14:31:47	40.85	22.81	59.5474	-12.1226	37.2874	Mozambique	1859.68	3.34729	46.2027	0.418488	1383.12	1.53639	46.013	0.114186	1628.08	0.659231	34.471	0.134418	0.967804	1.73931	2.88356	0.509714	37.3307	5.7888	280	10.46	22.48	2.19	71.534	19.5135	5.79689	10.0717	11.336	44.23	47.85	44.605	46.301	0.35	0.685	0.55	0.55807	0.0120531	2018	1	1063.03	101.885	1078.6
NIA_LDS19_141C	NIA_LDS19_8	2019-10-14 14:32:25	44.71	22.92	72.7484	-12.1225	37.2874	Mozambique	1343.4	4.70278	0.20713	0.342677	866.845	2.89188	0.017416	0.0383749	1671.45	2.0326	0.0213726	0.0739993	0.99998	1.73931	2.88356	0.509714	37.3307	5.7888	280	10.46	22.48	2.19	71.534	19.5135	5.79689	10.0717	11.336	44.23	47.85	44.605	46.301	0.35	0.685	0.55	0.55807	0.0120531	2018	1	1063.03	101.885	1078.6
NIA_LDS19_141D	NIA_LDS19_8	2019-10-14 14:33:04	42.26	21.25	65.4371	-12.1224	37.2871	Mozambique	841.525	3.20247	32.7385	0.363029	364.968	1.39157	32.5488	0.0587265	1519.5	2.11189	86.2458	0.244517	0.91812	1.73931	2.88356	0.509714	37.3307	5.7888	280	10.46	22.48	2.19	71.534	19.5135	5.79689	10.0717	11.336	44.23	47.85	44.605	46.301	0.35	0.685	0.55	0.55807	0.0120531	2018	1	1063.03	101.885	1078.6
NIA_LDS19_142A	NIA_LDS19_8	2019-10-14 14:35:19	44.82	20.85	75.1265	-12.1223	37.2871	Mozambique	1309.67	2.96816	32.2087	0.397625	833.11	1.15726	32.019	0.0933229	1617.21	0.818867	39.5574	0.181168	0.962989	1.73931	2.88356	0.509714	37.3307	5.7888	280	10.46	22.48	2.19	71.534	19.5135	5.79689	10.0717	11.336	44.23	47.85	44.605	46.301	0.35	0.685	0.55	0.55807	0.0120531	2018	1	1063.03	101.885	1078.6
NIA_LDS19_142B	NIA_LDS19_8	2019-10-14 14:35:57	43.62	21.29	70.2141	-12.1221	37.2872	Mozambique	1419.46	3.99606	39.4081	0.376037	942.906	2.18516	39.2184	0.0717346	1605.43	1.3562	42.498	0.122146	0.960068	1.73931	2.88356	0.509714	37.3307	5.7888	280	10.46	22.48	2.19	71.534	19.5135	5.79689	10.0717	11.336	44.23	47.85	44.605	46.301	0.35	0.685	0.55	0.55807	0.0120531	2018	1	1063.03	101.885	1078.6
NIA_LDS19_142C	NIA_LDS19_8	2019-10-14 14:36:35	44.95	21.18	75.3155	-12.1221	37.2871	Mozambique	1066.06	4.44716	53.5114	0.375439	589.498	2.63626	53.3217	0.0711372	1513.56	2.46733	87.1321	0.18266	0.91705	1.73931	2.88356	0.509714	37.3307	5.7888	280	10.46	22.48	2.19	71.534	19.5135	5.79689	10.0717	11.336	44.23	47.85	44.605	46.301	0.35	0.685	0.55	0.55807	0.0120531	2018	1	1063.03	101.885	1078.6
NIA_LDS19_142D	NIA_LDS19_8	2019-10-14 14:37:14	43.56	20.42	70.7693	-12.1221	37.287	Mozambique	850.62	3.22925	29.3744	0.361522	374.063	1.41835	29.1847	0.0572199	1536.75	2.12404	76.3081	0.235091	0.927626	1.73931	2.88356	0.509714	37.3307	5.7888	280	10.46	22.48	2.19	71.534	19.5135	5.79689	10.0717	11.336	44.23	47.85	44.605	46.301	0.35	0.685	0.55	0.55807	0.0120531	2018	1	1063.03	101.885	1078.6
NIA_LDS19_143A	NIA_LDS19_8	2019-10-14 14:40:00	41	20.26	62.005	-12.1219	37.2864	Mozambique	715.076	3.77365	32.3405	0.351994	238.519	1.96275	32.1508	0.047692	1429.01	4.28647	122.592	0.285752	0.881218	1.73931	2.88356	0.509714	37.3307	5.7888	280	10.46	22.48	2.19	71.534	19.5135	5.79689	10.0717	11.336	44.23	47.85	44.605	46.301	0.35	0.685	0.55	0.55807	0.0120531	2018	1	1063.03	101.885	1078.6
NIA_LDS19_143B	NIA_LDS19_8	2019-10-14 14:40:42	40.9	20.33	61.6236	-12.1219	37.2862	Mozambique	854.675	4.52665	44.7358	0.356102	378.118	2.71575	44.5461	0.0518	1458.04	3.81726	109.323	0.199757	0.894606	1.73931	2.88356	0.509714	37.3307	5.7888	280	10.46	22.48	2.19	71.534	19.5135	5.79689	10.0717	11.336	44.23	47.85	44.605	46.301	0.35	0.685	0.55	0.55807	0.0120531	2018	1	1063.03	101.885	1078.6
NIA_LDS19_143C	NIA_LDS19_8	2019-10-14 14:41:35	41.2	20.44	62.5227	-12.1219	37.2862	Mozambique	1278.74	4.25018	44.7299	0.378097	802.183	2.43928	44.5401	0.0737945	1577.4	1.74843	55.7412	0.145118	0.947397	1.73931	2.88356	0.509714	37.3307	5.7888	280	10.46	22.48	2.19	71.534	19.5135	5.79689	10.0717	11.336	44.23	47.85	44.605	46.301	0.35	0.685	0.55	0.55807	0.0120531	2018	1	1063.03	101.885	1078.6
NIA_LDS19_143D	NIA_LDS19_8	2019-10-14 14:42:12	41.61	20.35	63.9621	-12.1219	37.2862	Mozambique	1110.6	2.99558	28.0998	0.368541	634.043	1.18468	27.9101	0.0642383	1604.39	1.09273	44.9479	0.16256	0.957837	1.73931	2.88356	0.509714	37.3307	5.7888	280	10.46	22.48	2.19	71.534	19.5135	5.79689	10.0717	11.336	44.23	47.85	44.605	46.301	0.35	0.685	0.55	0.55807	0.0120531	2018	1	1063.03	101.885	1078.6
NIA_LDS19_144A	NIA_LDS19_8	2019-10-14 14:44:43	43.06	20.39	68.9775	-12.1221	37.2862	Mozambique	1367.53	3.7433	46.6049	0.390204	890.977	1.9324	46.4152	0.0859015	1588.84	1.25612	52.6781	0.153195	0.950485	1.73931	2.88356	0.509714	37.3307	5.7888	280	10.46	22.48	2.19	71.534	19.5135	5.79689	10.0717	11.336	44.23	47.85	44.605	46.301	0.35	0.685	0.55	0.55807	0.0120531	2018	1	1063.03	101.885	1078.6
NIA_LDS19_144B	NIA_LDS19_8	2019-10-14 14:45:21	45.72	19.88	79.6423	-12.1221	37.286	Mozambique	1760.25	3.64295	43.6375	0.392684	1283.69	1.83205	43.4478	0.0883821	1624.86	0.845302	35.0009	0.111879	0.967262	1.73931	2.88356	0.509714	37.3307	5.7888	280	10.46	22.48	2.19	71.534	19.5135	5.79689	10.0717	11.336	44.23	47.85	44.605	46.301	0.35	0.685	0.55	0.55807	0.0120531	2018	1	1063.03	101.885	1078.6
NIA_LDS19_145A	NIA_LDS19_8	2019-10-14 14:48:49	50.19	16.7	103.711	-12.1224	37.2859	Mozambique	930.87	4.16219	38.4749	0.362772	454.313	2.35129	38.2851	0.0584693	1518.6	2.86494	81.4473	0.195455	0.922279	1.73931	2.88356	0.509714	37.3307	5.7888	280	10.46	22.48	2.19	71.534	19.5135	5.79689	10.0717	11.336	44.23	47.85	44.605	46.301	0.35	0.685	0.55	0.55807	0.0120531	2018	1	1063.03	101.885	1078.6
NIA_LDS19_145B	NIA_LDS19_8	2019-10-14 14:49:25	49.3	16.41	99.5653	-12.1224	37.2857	Mozambique	585.531	2.54856	11.9109	0.346238	108.974	0.737661	11.7212	0.0419354	1474.88	3.63924	100.963	0.567602	0.902886	1.73931	2.88356	0.509714	37.3307	5.7888	280	10.46	22.48	2.19	71.534	19.5135	5.79689	10.0717	11.336	44.23	47.85	44.605	46.301	0.35	0.685	0.55	0.55807	0.0120531	2018	1	1063.03	101.885	1078.6
NIA_LDS19_145C	NIA_LDS19_8	2019-10-14 14:50:04	46.52	16.65	86.3046	-12.1224	37.2855	Mozambique	961.441	3.88068	42.3088	0.376785	484.884	2.06978	42.1191	0.0724828	1520.22	2.36545	84.0438	0.227266	0.920078	1.73931	2.88356	0.509714	37.3307	5.7888	280	10.46	22.48	2.19	71.534	19.5135	5.79689	10.0717	11.336	44.23	47.85	44.605	46.301	0.35	0.685	0.55	0.55807	0.0120531	2018	1	1063.03	101.885	1078.6
NIA_LDS19_145D	NIA_LDS19_8	2019-10-14 14:53:19	46.46	17.7	84.9576	-12.1227	37.2857	Mozambique	1066.3	3.39521	35.9881	0.380971	589.739	1.5843	35.7984	0.0766689	1571.3	1.53871	60.7041	0.20429	0.942772	1.73931	2.88356	0.509714	37.3307	5.7888	280	10.46	22.48	2.19	71.534	19.5135	5.79689	10.0717	11.336	44.23	47.85	44.605	46.301	0.35	0.685	0.55	0.55807	0.0120531	2018	1	1063.03	101.885	1078.6
NIA_LDS19_146A	NIA_LDS19_8	2019-10-14 14:54:00	44.63	17	0	-12.1227	37.2857	Mozambique	1081.21	5.55562	64.0219	0.380698	604.655	3.74472	63.8321	0.0763958	1481.07	3.34355	99.5096	0.18714	0.904512	1.73931	2.88356	0.509714	37.3307	5.7888	280	10.46	22.48	2.19	71.534	19.5135	5.79689	10.0717	11.336	44.23	47.85	44.605	46.301	0.35	0.685	0.55	0.55807	0.0120531	2018	1	1063.03	101.885	1078.6
NIA_LDS19_146B	NIA_LDS19_8	2019-10-14 14:54:35	43.54	16.73	73.9738	-12.1227	37.2857	Mozambique	840.707	3.1167	27.0392	0.367866	364.15	1.3058	26.8495	0.0635641	1544.73	2.01915	72.4881	0.269659	0.931331	1.73931	2.88356	0.509714	37.3307	5.7888	280	10.46	22.48	2.19	71.534	19.5135	5.79689	10.0717	11.336	44.23	47.85	44.605	46.301	0.35	0.685	0.55	0.55807	0.0120531	2018	1	1063.03	101.885	1078.6
NIA_LDS19_146C	NIA_LDS19_8	2019-10-14 14:54:54	44.71	16.87	78.4584	-12.1227	37.2853	Mozambique	1476.59	3.51243	42.5252	0.393887	1000.03	1.70153	42.3355	0.0895844	1608.39	0.997553	43.335	0.144091	0.959385	1.73931	2.88356	0.509714	37.3307	5.7888	280	10.46	22.48	2.19	71.534	19.5135	5.79689	10.0717	11.336	44.23	47.85	44.605	46.301	0.35	0.685	0.55	0.55807	0.0120531	2018	1	1063.03	101.885	1078.6
NIA_LDS19_147A	NIA_LDS19_8	2019-10-14 15:02:04	41.05	19.29	62.9255	-12.1219	37.2866	Mozambique	839.082	3.61373	38.2508	0.361041	362.524	1.80283	38.0611	0.056739	1489.05	2.69927	99.4968	0.233068	0.904986	1.73931	2.88356	0.509714	37.3307	5.7888	280	10.46	22.48	2.19	71.534	19.5135	5.79689	10.0717	11.336	44.23	47.85	44.605	46.301	0.35	0.685	0.55	0.55807	0.0120531	2018	1	1063.03	101.885	1078.6
NIA_LDS19_147B	NIA_LDS19_8	2019-10-14 15:02:42	42.8	19.59	68.7317	-12.1214	37.2868	Mozambique	736.014	2.26449	11.642	0.400624	259.457	0.453586	11.4523	0.0963214	1605.01	1.0228	45.088	0.595886	0.957726	1.73931	2.88356	0.509714	37.3307	5.7888	280	10.46	22.48	2.19	71.534	19.5135	5.79689	10.0717	11.336	44.23	47.85	44.605	46.301	0.35	0.685	0.55	0.55807	0.0120531	2018	1	1063.03	101.885	1078.6
NIA_LDS19_147C	NIA_LDS19_8	2019-10-14 15:03:19	43.22	19.05	70.7257	-12.1215	37.2868	Mozambique	487.298	1.85701	0.995483	0.343707	10.7408	0.0461085	0.805769	0.0394044	1538.27	2.40711	73.4449	5.64375	0.930216	1.73931	2.88356	0.509714	37.3307	5.7888	280	10.46	22.48	2.19	71.534	19.5135	5.79689	10.0717	11.336	44.23	47.85	44.605	46.301	0.35	0.685	0.55	0.55807	0.0120531	2018	1	1063.03	101.885	1078.6
NIA_LDS19_147D	NIA_LDS19_8	2019-10-14 15:03:56	46.94	19.02	85.6587	-12.1213	37.2872	Mozambique	562.283	3.10224	21.4776	0.346329	85.726	1.29134	21.2879	0.0420264	1261.86	6.92884	199.429	0.618658	0.801074	1.73931	2.88356	0.509714	37.3307	5.7888	280	10.46	22.48	2.19	71.534	19.5135	5.79689	10.0717	11.336	44.23	47.85	44.605	46.301	0.35	0.685	0.55	0.55807	0.0120531	2018	1	1063.03	101.885	1078.6
NIA_LDS19_148A	NIA_LDS19_8	2019-10-14 15:07:54	43.8	20.95	71.1792	-12.1213	37.2871	Mozambique	1082.46	12.1692	102.867	0.382606	605.904	10.3583	102.677	0.0783035	1340.36	8.35265	144.56	0.173232	0.855095	1.73931	2.88356	0.509714	37.3307	5.7888	280	10.46	22.48	2.19	71.534	19.5135	5.79689	10.0717	11.336	44.23	47.85	44.605	46.301	0.35	0.685	0.55	0.55807	0.0120531	2018	1	1063.03	101.885	1078.6
NIA_LDS19_148B	NIA_LDS19_8	2019-10-14 15:08:32	44.44	20.74	73.7713	-12.1212	37.2871	Mozambique	988.064	9.41798	56.2143	0.406363	511.507	7.60708	56.0246	0.102061	1426.92	7.73549	99.4684	0.284734	0.901284	1.73931	2.88356	0.509714	37.3307	5.7888	280	10.46	22.48	2.19	71.534	19.5135	5.79689	10.0717	11.336	44.23	47.85	44.605	46.301	0.35	0.685	0.55	0.55807	0.0120531	2018	1	1063.03	101.885	1078.6
NIA_LDS19_148C	NIA_LDS19_8	2019-10-14 15:09:10	53.03	20.86	113.274	-12.1213	37.2871	Mozambique	1839.98	19.7255	218.48	0.417096	1363.42	17.9146	218.29	0.112794	1370.93	6.56617	139.693	0.113422	0.861991	1.73931	2.88356	0.509714	37.3307	5.7888	280	10.46	22.48	2.19	71.534	19.5135	5.79689	10.0717	11.336	44.23	47.85	44.605	46.301	0.35	0.685	0.55	0.55807	0.0120531	2018	1	1063.03	101.885	1078.6
NIA_LDS19_148D	NIA_LDS19_8	2019-10-14 15:09:47	52.59	21.13	110.495	-12.1213	37.2871	Mozambique	1112.76	12.7374	106.537	0.373888	636.202	10.9265	106.347	0.0695853	1342.7	8.4059	142.846	0.146869	0.856781	1.73931	2.88356	0.509714	37.3307	5.7888	280	10.46	22.48	2.19	71.534	19.5135	5.79689	10.0717	11.336	44.23	47.85	44.605	46.301	0.35	0.685	0.55	0.55807	0.0120531	2018	1	1063.03	101.885	1078.6
NIA_LDS19_149A	NIA_LDS19_8	2019-10-14 15:12:41	45.8	16.89	82.9532	-12.1212	37.287	Mozambique	561.147	2.49167	12.2132	0.368119	84.5898	0.680769	12.0235	0.0638165	1420.2	4.16631	128.475	1.0715	0.87555	1.73931	2.88356	0.509714	37.3307	5.7888	280	10.46	22.48	2.19	71.534	19.5135	5.79689	10.0717	11.336	44.23	47.85	44.605	46.301	0.35	0.685	0.55	0.55807	0.0120531	2018	1	1063.03	101.885	1078.6
NIA_LDS19_149B	NIA_LDS19_8	2019-10-14 15:13:21	43.25	16.77	72.8314	-12.1211	37.2868	Mozambique	657.543	2.78482	19.5039	0.3548	180.986	0.973918	19.3142	0.0504978	1484.15	2.91122	100.801	0.414128	0.903574	1.73931	2.88356	0.509714	37.3307	5.7888	280	10.46	22.48	2.19	71.534	19.5135	5.79689	10.0717	11.336	44.23	47.85	44.605	46.301	0.35	0.685	0.55	0.55807	0.0120531	2018	1	1063.03	101.885	1078.6
NIA_LDS19_150A	NIA_LDS19_8	2019-10-14 15:16:19	40.09	18.24	60.5776	-12.1213	37.2866	Mozambique	643.403	2.37239	13.3204	0.354721	166.845	0.561492	13.1306	0.0504192	1538.37	1.88717	77.053	0.464913	0.927042	1.73931	2.88356	0.509714	37.3307	5.7888	280	10.46	22.48	2.19	71.534	19.5135	5.79689	10.0717	11.336	44.23	47.85	44.605	46.301	0.35	0.685	0.55	0.55807	0.0120531	2018	1	1063.03	101.885	1078.6
NIA_LDS19_150B	NIA_LDS19_8	2019-10-14 15:16:57	40.35	18.43	61.2787	-12.1216	37.2863	Mozambique	733.785	2.38178	13.9036	0.357242	257.228	0.570878	13.7139	0.0529403	1586.48	1.28345	53.8314	0.326537	0.949384	1.73931	2.88356	0.509714	37.3307	5.7888	280	10.46	22.48	2.19	71.534	19.5135	5.79689	10.0717	11.336	44.23	47.85	44.605	46.301	0.35	0.685	0.55	0.55807	0.0120531	2018	1	1063.03	101.885	1078.6
NIA_LDS19_150C	NIA_LDS19_8	2019-10-14 15:17:37	40.22	18.92	60.4909	-12.1217	37.2863	Mozambique	755.415	2.64315	20.3849	0.362034	278.857	0.832244	20.1952	0.0577323	1550.61	1.68692	71.4706	0.321048	0.932469	1.73931	2.88356	0.509714	37.3307	5.7888	280	10.46	22.48	2.19	71.534	19.5135	5.79689	10.0717	11.336	44.23	47.85	44.605	46.301	0.35	0.685	0.55	0.55807	0.0120531	2018	1	1063.03	101.885	1078.6
NIA_LDS19_150D	NIA_LDS19_8	2019-10-14 15:18:14	40.37	18.8	61.0657	-12.1215	37.2863	Mozambique	682.755	2.85022	12.4137	0.403723	206.197	1.03932	12.224	0.0994204	1558.29	2.86308	58.7942	0.751398	0.944035	1.73931	2.88356	0.509714	37.3307	5.7888	280	10.46	22.48	2.19	71.534	19.5135	5.79689	10.0717	11.336	44.23	47.85	44.605	46.301	0.35	0.685	0.55	0.55807	0.0120531	2018	1	1063.03	101.885	1078.6
NIA_LDS19_151A	NIA_LDS19_8	2019-10-14 15:20:40	41.05	19.59	62.6916	-12.1218	37.2866	Mozambique	1241.64	4.60926	54.9404	0.392002	765.083	2.79836	54.7507	0.0876998	1547.68	2.06347	70.4889	0.17742	0.933217	1.73931	2.88356	0.509714	37.3307	5.7888	280	10.46	22.48	2.19	71.534	19.5135	5.79689	10.0717	11.336	44.23	47.85	44.605	46.301	0.35	0.685	0.55	0.55807	0.0120531	2018	1	1063.03	101.885	1078.6
NIA_LDS19_151B	NIA_LDS19_8	2019-10-14 15:21:17	42.33	19.76	66.9204	-12.1216	37.2866	Mozambique	1305.16	5.33168	67.9681	0.390198	828.605	3.52078	67.7784	0.0858954	1528.07	2.36677	79.551	0.158415	0.924387	1.73931	2.88356	0.509714	37.3307	5.7888	280	10.46	22.48	2.19	71.534	19.5135	5.79689	10.0717	11.336	44.23	47.85	44.605	46.301	0.35	0.685	0.55	0.55807	0.0120531	2018	1	1063.03	101.885	1078.6
NIA_LDS19_151C	NIA_LDS19_8	2019-10-14 15:21:54	43.46	19.82	70.9333	-12.1217	37.2866	Mozambique	1621.15	5.23392	70.1382	0.417802	1144.6	3.42302	69.9485	0.1135	1568.64	1.71002	61.0109	0.15556	0.942408	1.73931	2.88356	0.509714	37.3307	5.7888	280	10.46	22.48	2.19	71.534	19.5135	5.79689	10.0717	11.336	44.23	47.85	44.605	46.301	0.35	0.685	0.55	0.55807	0.0120531	2018	1	1063.03	101.885	1078.6
NIA_LDS19_152A	NIA_LDS19_8	2019-10-14 15:24:40	43.35	18.82	71.4082	-12.1213	37.2864	Mozambique	658.844	2.26443	11.4797	0.352451	182.287	0.453532	11.2899	0.0481486	1570.6	1.42442	61.9097	0.41488	0.941677	1.73931	2.88356	0.509714	37.3307	5.7888	280	10.46	22.48	2.19	71.534	19.5135	5.79689	10.0717	11.336	44.23	47.85	44.605	46.301	0.35	0.685	0.55	0.55807	0.0120531	2018	1	1063.03	101.885	1078.6
NIA_LDS19_152B	NIA_LDS19_8	2019-10-14 15:25:17	42.2	17.94	67.9734	-12.1214	37.2861	Mozambique	931.908	2.92346	25.5556	0.364411	455.35	1.11255	25.3659	0.0601089	1581.05	1.40813	56.054	0.208722	0.947233	1.73931	2.88356	0.509714	37.3307	5.7888	280	10.46	22.48	2.19	71.534	19.5135	5.79689	10.0717	11.336	44.23	47.85	44.605	46.301	0.35	0.685	0.55	0.55807	0.0120531	2018	1	1063.03	101.885	1078.6
NIA_LDS19_152C	NIA_LDS19_8	2019-10-14 15:25:54	42.59	18.54	68.8691	-12.1215	37.286	Mozambique	564.725	2.13268	7.62041	0.347394	88.1675	0.321774	7.4307	0.0430921	1527.98	2.03274	81.9589	0.746856	0.922272	1.73931	2.88356	0.509714	37.3307	5.7888	280	10.46	22.48	2.19	71.534	19.5135	5.79689	10.0717	11.336	44.23	47.85	44.605	46.301	0.35	0.685	0.55	0.55807	0.0120531	2018	1	1063.03	101.885	1078.6
NIA_LDS19_152D	NIA_LDS19_8	2019-10-14 15:26:31	40.24	18	0	-12.1216	37.286	Mozambique	723.619	2.87403	23.2279	0.360069	247.062	1.06313	23.0382	0.0557665	1510.39	2.36912	89.6369	0.340946	0.914705	1.73931	2.88356	0.509714	37.3307	5.7888	280	10.46	22.48	2.19	71.534	19.5135	5.79689	10.0717	11.336	44.23	47.85	44.605	46.301	0.35	0.685	0.55	0.55807	0.0120531	2018	1	1063.03	101.885	1078.6
NIA_LDS19_153B	NIA_LDS19_8	2019-10-14 15:29:41	41.43	18.48	64.8456	-12.1216	37.2859	Mozambique	526.38	2.13833	7.52337	0.347284	49.8227	0.327426	7.33366	0.0429822	1421.4	3.40504	133.158	1.22633	0.871691	1.73931	2.88356	0.509714	37.3307	5.7888	280	10.46	22.48	2.19	71.534	19.5135	5.79689	10.0717	11.336	44.23	47.85	44.605	46.301	0.35	0.685	0.55	0.55807	0.0120531	2018	1	1063.03	101.885	1078.6
NIA_LDS19_153C	NIA_LDS19_8	2019-10-14 15:30:18	40.55	18.2	62.1079	-12.1214	37.286	Mozambique	975.884	3.34165	34.2425	0.375365	499.326	1.53075	34.0528	0.0710631	1556.79	1.73968	67.5703	0.221574	0.936157	1.73931	2.88356	0.509714	37.3307	5.7888	280	10.46	22.48	2.19	71.534	19.5135	5.79689	10.0717	11.336	44.23	47.85	44.605	46.301	0.35	0.685	0.55	0.55807	0.0120531	2018	1	1063.03	101.885	1078.6
NIA_LDS19_153D	NIA_LDS19_8	2019-10-14 15:30:56	41.79	18.69	65.9169	-12.1215	37.286	Mozambique	815.259	2.71687	19.4584	0.360643	338.702	0.905968	19.2687	0.0563405	1577.58	1.53818	57.1193	0.262436	0.946172	1.73931	2.88356	0.509714	37.3307	5.7888	280	10.46	22.48	2.19	71.534	19.5135	5.79689	10.0717	11.336	44.23	47.85	44.605	46.301	0.35	0.685	0.55	0.55807	0.0120531	2018	1	1063.03	101.885	1078.6
NIA_LDS19_154A	NIA_LDS19_8	2019-10-14 15:33:33	43.06	19.06	70.1299	-12.1213	37.2862	Mozambique	672.254	2.36102	19.4499	0.360799	195.697	0.550121	19.2601	0.0564972	1511.67	1.549	94.6867	0.436445	0.9104	1.73931	2.88356	0.509714	37.3307	5.7888	280	10.46	22.48	2.19	71.534	19.5135	5.79689	10.0717	11.336	44.23	47.85	44.605	46.301	0.35	0.685	0.55	0.55807	0.0120531	2018	1	1063.03	101.885	1078.6
NIA_LDS19_154B	NIA_LDS19_8	2019-10-14 15:34:11	43.46	19.11	71.5614	-12.1215	37.286	Mozambique	1034.42	4.46514	54.6072	0.378128	557.863	2.65424	54.4175	0.0738257	1501.25	2.60367	93.2011	0.198684	0.911123	1.73931	2.88356	0.509714	37.3307	5.7888	280	10.46	22.48	2.19	71.534	19.5135	5.79689	10.0717	11.336	44.23	47.85	44.605	46.301	0.35	0.685	0.55	0.55807	0.0120531	2018	1	1063.03	101.885	1078.6
NIA_LDS19_154C	NIA_LDS19_8	2019-10-14 15:34:48	43.93	19.02	73.4101	-12.1214	37.2861	Mozambique	790.571	3.71035	35.9146	0.361433	314.014	1.89945	35.7249	0.0571305	1470.18	3.24167	106.451	0.267497	0.897853	1.73931	2.88356	0.509714	37.3307	5.7888	280	10.46	22.48	2.19	71.534	19.5135	5.79689	10.0717	11.336	44.23	47.85	44.605	46.301	0.35	0.685	0.55	0.55807	0.0120531	2018	1	1063.03	101.885	1078.6
NIA_LDS19_154D	NIA_LDS19_8	2019-10-14 15:35:25	49.48	18.98	97.3741	-12.1214	37.2861	Mozambique	538.241	2.18357	8.6189	0.343089	61.684	0.372665	8.42918	0.0387869	1438.43	3.16779	125.101	0.904547	0.879777	1.73931	2.88356	0.509714	37.3307	5.7888	280	10.46	22.48	2.19	71.534	19.5135	5.79689	10.0717	11.336	44.23	47.85	44.605	46.301	0.35	0.685	0.55	0.55807	0.0120531	2018	1	1063.03	101.885	1078.6
NIA_LDS19_155A	NIA_LDS19_8	2019-10-14 15:49:44	39.13	21.73	55.0915	-12.121	37.2874	Mozambique	824.587	2.73135	15.3367	0.355406	348.03	0.920448	15.147	0.0511037	1599.94	1.54244	44.3171	0.234947	0.958293	1.73931	2.88356	0.509714	37.3307	5.7888	280	10.46	22.48	2.19	71.534	19.5135	5.79689	10.0717	11.336	44.23	47.85	44.605	46.301	0.35	0.685	0.55	0.55807	0.0120531	2018	1	1063.03	101.885	1078.6
NIA_LDS19_155B	NIA_LDS19_8	2019-10-14 15:50:23	39.05	21.71	54.8696	-12.121	37.2874	Mozambique	516.312	1.92102	3.07886	0.429864	39.7546	0.110118	2.88915	0.125562	1551.58	1.56663	71.7653	4.9009	0.932249	1.73931	2.88356	0.509714	37.3307	5.7888	280	10.46	22.48	2.19	71.534	19.5135	5.79689	10.0717	11.336	44.23	47.85	44.605	46.301	0.35	0.685	0.55	0.55807	0.0120531	2018	1	1063.03	101.885	1078.6
NIA_LDS19_155C	NIA_LDS19_8	2019-10-14 15:51:00	37.76	21.17	51.5363	-12.1209	37.2873	Mozambique	599.488	2.08637	9.42748	0.355527	122.931	0.275463	9.23776	0.0512251	1551.05	1.26692	74.1806	0.646367	0.930106	1.73931	2.88356	0.509714	37.3307	5.7888	280	10.46	22.48	2.19	71.534	19.5135	5.79689	10.0717	11.336	44.23	47.85	44.605	46.301	0.35	0.685	0.55	0.55807	0.0120531	2018	1	1063.03	101.885	1078.6
NIA_LDS19_156A	NIA_LDS19_8	2019-10-14 15:53:53	38.1	22.35	51.7072	-12.1209	37.2872	Mozambique	831.773	2.85782	24.541	0.365064	355.216	1.04692	24.3513	0.0607619	1556.99	1.67273	67.9316	0.266351	0.935845	1.73931	2.88356	0.509714	37.3307	5.7888	280	10.46	22.48	2.19	71.534	19.5135	5.79689	10.0717	11.336	44.23	47.85	44.605	46.301	0.35	0.685	0.55	0.55807	0.0120531	2018	1	1063.03	101.885	1078.6
NIA_LDS19_156B	NIA_LDS19_8	2019-10-14 15:54:31	38.24	22.21	52.1936	-12.1208	37.2872	Mozambique	839.72	2.53481	17.7564	0.362831	363.163	0.723908	17.5667	0.0585291	1596.22	1.15983	49.1404	0.257272	0.95386	1.73931	2.88356	0.509714	37.3307	5.7888	280	10.46	22.48	2.19	71.534	19.5135	5.79689	10.0717	11.336	44.23	47.85	44.605	46.301	0.35	0.685	0.55	0.55807	0.0120531	2018	1	1063.03	101.885	1078.6
NIA_LDS19_156C	NIA_LDS19_8	2019-10-14 15:55:08	38.32	21.91	52.6215	-12.1208	37.2872	Mozambique	594.794	2.30664	12.3924	0.35172	118.237	0.49574	12.2027	0.0474181	1496.27	2.28681	98.2808	0.600109	0.90645	1.73931	2.88356	0.509714	37.3307	5.7888	280	10.46	22.48	2.19	71.534	19.5135	5.79689	10.0717	11.336	44.23	47.85	44.605	46.301	0.35	0.685	0.55	0.55807	0.0120531	2018	1	1063.03	101.885	1078.6
NIA_LDS19_cal9	NIA_LDS19_9	calibration						Mozambique	4896.18	15.4678	102.788	1.14303	4427.2	13.6463	102.566	0.821842	1585.96	1.78196	23.3844	0.29443	0.977357
NIA_LDS19_157A	NIA_LDS19_9	2019-10-16 14:46:02	39.35	31.82	48.5586	-12.0994	37.5643	Mozambique	1391.5	5.89809	72.0437	0.350129	922.523	4.07654	71.8221	0.0289411	1559.27	2.51164	77.2608	0.0489203	0.927769	1.66675	2.66347	0.848138	32.1205	5.84673	340	6.38	14.22	2.98	69.9819	11.2486	12.2995	8.97207	11.4317	43.93	48.27	49.605	47.0917	0.265	0.61	0.535	0.486671	0.0103345	2018	1	1100.82	111.265	1121.78
NIA_LDS19_157B	NIA_LDS19_9	2019-10-16 14:46:39	41.31	31.42	54.208	-12.0994	37.5644	Mozambique	1009.36	3.74632	36.2158	0.334435	540.385	1.92477	35.9942	0.0132472	1582.71	2.05493	67.0944	0.0388017	0.937551	1.66675	2.66347	0.848138	32.1205	5.84673	340	6.38	14.22	2.98	69.9819	11.2486	12.2995	8.97207	11.4317	43.93	48.27	49.605	47.0917	0.265	0.61	0.535	0.486671	0.0103345	2018	1	1100.82	111.265	1121.78
NIA_LDS19_157C	NIA_LDS19_9	2019-10-16 14:49:45	48.68	29.45	81.4681	-12.0994	37.5644	Mozambique	849.06	3.73369	24.313	0.317238	380.083	1.91215	24.0914	-0.0039497	1578.34	2.89443	63.6708	-0.0164027	0.940394	1.66675	2.66347	0.848138	32.1205	5.84673	340	6.38	14.22	2.98	69.9819	11.2486	12.2995	8.97207	11.4317	43.93	48.27	49.605	47.0917	0.265	0.61	0.535	0.486671	0.0103345	2018	1	1100.82	111.265	1121.78
NIA_LDS19_157D	NIA_LDS19_9	2019-10-16 14:50:22	48.57	28.85	81.7092	-12.0994	37.5644	Mozambique	631.915	2.47632	13.8728	0.311038	162.939	0.65477	13.6511	-0.0101501	1552.53	2.27419	82.7832	-0.0967204	0.922696	1.66675	2.66347	0.848138	32.1205	5.84673	340	6.38	14.22	2.98	69.9819	11.2486	12.2995	8.97207	11.4317	43.93	48.27	49.605	47.0917	0.265	0.61	0.535	0.486671	0.0103345	2018	1	1100.82	111.265	1121.78
NIA_LDS19_158A	NIA_LDS19_9	2019-10-16 14:55:22	48.16	17.96	92.2953	-12.0996	37.5639	Mozambique	681.698	2.42381	15.2788	0.318766	212.721	0.602265	15.0571	-0.00242211	1580.73	1.63138	71.2108	-0.0179999	0.933896	1.66675	2.66347	0.848138	32.1205	5.84673	340	6.38	14.22	2.98	69.9819	11.2486	12.2995	8.97207	11.4317	43.93	48.27	49.605	47.0917	0.265	0.61	0.535	0.486671	0.0103345	2018	1	1100.82	111.265	1121.78
NIA_LDS19_158B	NIA_LDS19_9	2019-10-16 14:56:14	47.51	15.62	91.8681	-12.0996	37.564	Mozambique	1780.63	5.16905	73.6432	0.370733	1311.65	3.3475	73.4216	0.0495448	1606.87	1.49487	57.2455	0.0606999	0.946991	1.66675	2.66347	0.848138	32.1205	5.84673	340	6.38	14.22	2.98	69.9819	11.2486	12.2995	8.97207	11.4317	43.93	48.27	49.605	47.0917	0.265	0.61	0.535	0.486671	0.0103345	2018	1	1100.82	111.265	1121.78
NIA_LDS19_158C	NIA_LDS19_9	2019-10-16 14:56:51	48.77	15.87	97.5887	-12.0994	37.5639	Mozambique	1180.41	3.17018	33.2471	0.338024	711.437	1.34864	33.0255	0.0168357	1627.48	1.12459	48.0823	0.0385158	0.955639	1.66675	2.66347	0.848138	32.1205	5.84673	340	6.38	14.22	2.98	69.9819	11.2486	12.2995	8.97207	11.4317	43.93	48.27	49.605	47.0917	0.265	0.61	0.535	0.486671	0.0103345	2018	1	1100.82	111.265	1121.78
NIA_LDS19_158D	NIA_LDS19_9	2019-10-16 14:57:28	47.31	15.96	90.5774	-12.0993	37.5638	Mozambique	1159.81	3.12442	32.9063	0.343287	690.828	1.30288	32.6847	0.0220985	1626.02	1.11784	48.9619	0.0520174	0.954825	1.66675	2.66347	0.848138	32.1205	5.84673	340	6.38	14.22	2.98	69.9819	11.2486	12.2995	8.97207	11.4317	43.93	48.27	49.605	47.0917	0.265	0.61	0.535	0.486671	0.0103345	2018	1	1100.82	111.265	1121.78
NIA_LDS19_159A	NIA_LDS19_9	2019-10-16 15:00:06	47.93	15.31	94.18	-12.0995	37.5639	Mozambique	909.103	4.89061	55.4371	0.322876	440.126	3.06906	55.2155	0.00168807	1473.35	3.74503	117.638	0.00565131	0.888531	1.66675	2.66347	0.848138	32.1205	5.84673	340	6.38	14.22	2.98	69.9819	11.2486	12.2995	8.97207	11.4317	43.93	48.27	49.605	47.0917	0.265	0.61	0.535	0.486671	0.0103345	2018	1	1100.82	111.265	1121.78
NIA_LDS19_159B	NIA_LDS19_9	2019-10-16 15:00:43	62.48	15.18	189.44	-12.0988	37.5635	Mozambique	1929.88	4.10247	52.895	0.363214	1460.9	2.28092	52.6733	0.0420254	1647.77	0.937792	37.8114	0.0474042	0.965199	1.66675	2.66347	0.848138	32.1205	5.84673	340	6.38	14.22	2.98	69.9819	11.2486	12.2995	8.97207	11.4317	43.93	48.27	49.605	47.0917	0.265	0.61	0.535	0.486671	0.0103345	2018	1	1100.82	111.265	1121.78
NIA_LDS19_159C	NIA_LDS19_9	2019-10-16 15:01:20	57.32	15.18	149.106	-12.0987	37.5632	Mozambique	1717.93	6.88353	98.5965	0.366359	1248.95	5.06198	98.3748	0.0451704	1560.16	2.30496	78.2103	0.0564294	0.926985	1.66675	2.66347	0.848138	32.1205	5.84673	340	6.38	14.22	2.98	69.9819	11.2486	12.2995	8.97207	11.4317	43.93	48.27	49.605	47.0917	0.265	0.61	0.535	0.486671	0.0103345	2018	1	1100.82	111.265	1121.78
NIA_LDS19_159D	NIA_LDS19_9	2019-10-16 15:02:00	61.92	14.7	185.7	-12.0985	37.5631	Mozambique	864.602	3.8712	41.2594	0.322907	395.626	2.04965	41.0378	0.00171915	1515.1	2.86127	100.023	0.00658416	0.90602	1.66675	2.66347	0.848138	32.1205	5.84673	340	6.38	14.22	2.98	69.9819	11.2486	12.2995	8.97207	11.4317	43.93	48.27	49.605	47.0917	0.265	0.61	0.535	0.486671	0.0103345	2018	1	1100.82	111.265	1121.78
NIA_LDS19_160A	NIA_LDS19_9	2019-10-16 15:04:03	51.78	13.21	116.868	-12.0985	37.5636	Mozambique	994.478	3.38668	32.8148	0.327062	525.501	1.56513	32.5932	0.00587354	1594.02	1.73058	62.9221	0.0178176	0.941599	1.66675	2.66347	0.848138	32.1205	5.84673	340	6.38	14.22	2.98	69.9819	11.2486	12.2995	8.97207	11.4317	43.93	48.27	49.605	47.0917	0.265	0.61	0.535	0.486671	0.0103345	2018	1	1100.82	111.265	1121.78
NIA_LDS19_160B	NIA_LDS19_9	2019-10-16 15:04:39	56.18	13.13	144.677	-12.0979	37.5633	Mozambique	1189.09	4.32778	42.7669	0.314062	720.113	2.50623	42.5452	-0.00712631	1595.52	2.02415	59.9942	-0.0157905	0.944215	1.66675	2.66347	0.848138	32.1205	5.84673	340	6.38	14.22	2.98	69.9819	11.2486	12.2995	8.97207	11.4317	43.93	48.27	49.605	47.0917	0.265	0.61	0.535	0.486671	0.0103345	2018	1	1100.82	111.265	1121.78
NIA_LDS19_160C	NIA_LDS19_9	2019-10-16 15:05:16	53.19	13.26	125.121	-12.0977	37.5627	Mozambique	645.19	2.89055	19.1762	0.310309	176.213	1.069	18.9546	-0.0108794	1504.19	3.32632	102.976	-0.0928749	0.902881	1.66675	2.66347	0.848138	32.1205	5.84673	340	6.38	14.22	2.98	69.9819	11.2486	12.2995	8.97207	11.4317	43.93	48.27	49.605	47.0917	0.265	0.61	0.535	0.486671	0.0103345	2018	1	1100.82	111.265	1121.78
NIA_LDS19_161A	NIA_LDS19_9	2019-10-16 15:08:38	48.19	14.04	96.8513	-12.0976	37.5622	Mozambique	1402.8	5.10757	64.9902	0.347875	933.823	3.28602	64.7686	0.0266864	1578.55	2.02481	69.6812	0.0451143	0.93514	1.66675	2.66347	0.848138	32.1205	5.84673	340	6.38	14.22	2.98	69.9819	11.2486	12.2995	8.97207	11.4317	43.93	48.27	49.605	47.0917	0.265	0.61	0.535	0.486671	0.0103345	2018	1	1100.82	111.265	1121.78
NIA_LDS19_161B	NIA_LDS19_9	2019-10-16 15:09:15	48.16	14.03	96.7166	-12.0974	37.5619	Mozambique	820.078	1.89447	73.1955	0.326355	351.101	0.0729239	72.9739	0.00516647	1399.99	0.105995	185.191	0.0206024	0.827922	1.66675	2.66347	0.848138	32.1205	5.84673	340	6.38	14.22	2.98	69.9819	11.2486	12.2995	8.97207	11.4317	43.93	48.27	49.605	47.0917	0.265	0.61	0.535	0.486671	0.0103345	2018	1	1100.82	111.265	1121.78
NIA_LDS19_161C	NIA_LDS19_9	2019-10-16 15:09:52	49	14.15	100.736	-12.0976	37.5618	Mozambique	812.331	4.22885	41.2478	0.319856	343.354	2.4073	41.0262	-0.0013324	1481.54	3.78638	112.665	-0.00574959	0.893267	1.66675	2.66347	0.848138	32.1205	5.84673	340	6.38	14.22	2.98	69.9819	11.2486	12.2995	8.97207	11.4317	43.93	48.27	49.605	47.0917	0.265	0.61	0.535	0.486671	0.0103345	2018	1	1100.82	111.265	1121.78
NIA_LDS19_162A	NIA_LDS19_9	2019-10-16 15:12:09	46.83	14.29	90.1574	-12.0977	37.5628	Mozambique	1058.15	3.96968	45.4426	0.336002	589.172	2.14814	45.221	0.0148135	1565.93	2.08119	76.4938	0.0393746	0.928718	1.66675	2.66347	0.848138	32.1205	5.84673	340	6.38	14.22	2.98	69.9819	11.2486	12.2995	8.97207	11.4317	43.93	48.27	49.605	47.0917	0.265	0.61	0.535	0.486671	0.0103345	2018	1	1100.82	111.265	1121.78
NIA_LDS19_163A	NIA_LDS19_9	2019-10-16 15:15:34	53.07	14.21	123.031	-12.0971	37.563	Mozambique	899.184	5.09182	53.4167	0.411044	430.207	3.27027	53.1951	0.0898554	1472.32	4.07971	115.865	0.307538	0.889957	1.66675	2.66347	0.848138	32.1205	5.84673	340	6.38	14.22	2.98	69.9819	11.2486	12.2995	8.97207	11.4317	43.93	48.27	49.605	47.0917	0.265	0.61	0.535	0.486671	0.0103345	2018	1	1100.82	111.265	1121.78
NIA_LDS19_163B	NIA_LDS19_9	2019-10-16 15:16:17	50.55	13.27	109.923	-12.097	37.5629	Mozambique	746.71	4.20984	38.5081	0.313867	277.733	2.38829	38.2864	-0.00732154	1447.23	4.53648	126.973	-0.0381542	0.878848	1.66675	2.66347	0.848138	32.1205	5.84673	340	6.38	14.22	2.98	69.9819	11.2486	12.2995	8.97207	11.4317	43.93	48.27	49.605	47.0917	0.265	0.61	0.535	0.486671	0.0103345	2018	1	1100.82	111.265	1121.78
NIA_LDS19_164A	NIA_LDS19_9	2019-10-16 15:18:57	45.94	13.79	86.6653	-12.0966	37.5625	Mozambique	798.917	3.88406	36.7723	0.321991	329.941	2.06251	36.5507	0.000803246	1498.43	3.41442	105.646	0.00364819	0.900269	1.66675	2.66347	0.848138	32.1205	5.84673	340	6.38	14.22	2.98	69.9819	11.2486	12.2995	8.97207	11.4317	43.93	48.27	49.605	47.0917	0.265	0.61	0.535	0.486671	0.0103345	2018	1	1100.82	111.265	1121.78
NIA_LDS19_164B	NIA_LDS19_9	2019-10-16 15:19:35	48.34	13.68	97.9928	-12.096	37.5614	Mozambique	1161.05	4.46795	51.0254	0.336405	692.069	2.6464	50.8038	0.0152164	1570.1	2.18854	73.355	0.0345237	0.931612	1.66675	2.66347	0.848138	32.1205	5.84673	340	6.38	14.22	2.98	69.9819	11.2486	12.2995	8.97207	11.4317	43.93	48.27	49.605	47.0917	0.265	0.61	0.535	0.486671	0.0103345	2018	1	1100.82	111.265	1121.78
NIA_LDS19_164C	NIA_LDS19_9	2019-10-16 15:20:14	47.93	13.97	95.6702	-12.0962	37.5613	Mozambique	895.778	5.11746	56.514	0.327677	426.801	3.29591	56.2924	0.00648915	1460.2	4.11038	122.572	0.0222026	0.883475	1.66675	2.66347	0.848138	32.1205	5.84673	340	6.38	14.22	2.98	69.9819	11.2486	12.2995	8.97207	11.4317	43.93	48.27	49.605	47.0917	0.265	0.61	0.535	0.486671	0.0103345	2018	1	1100.82	111.265	1121.78
NIA_LDS19_165A	NIA_LDS19_9	2019-10-16 15:22:48	44.04	15.07	77.4307	-12.0964	37.5614	Mozambique	1042.23	5.08248	61.9384	0.33575	573.256	3.26094	61.7168	0.014562	1506.29	3.12336	103.209	0.0382657	0.902804	1.66675	2.66347	0.848138	32.1205	5.84673	340	6.38	14.22	2.98	69.9819	11.2486	12.2995	8.97207	11.4317	43.93	48.27	49.605	47.0917	0.265	0.61	0.535	0.486671	0.0103345	2018	1	1100.82	111.265	1121.78
NIA_LDS19_165B	NIA_LDS19_9	2019-10-16 15:23:26	46.86	15	0	-12.0962	37.5613	Mozambique	774.932	2.31384	10.2996	0.31854	305.955	0.492294	10.078	-0.00264795	1652.91	0.969476	34.6515	-0.0143064	0.968111	1.66675	2.66347	0.848138	32.1205	5.84673	340	6.38	14.22	2.98	69.9819	11.2486	12.2995	8.97207	11.4317	43.93	48.27	49.605	47.0917	0.265	0.61	0.535	0.486671	0.0103345	2018	1	1100.82	111.265	1121.78
NIA_LDS19_165C	NIA_LDS19_9	2019-10-16 15:24:04	45.99	15.39	85.2743	-12.0955	37.5619	Mozambique	1324.92	3.88381	47.8643	0.341469	855.943	2.06226	47.6427	0.0202812	1608.35	1.41254	56.9758	0.0381118	0.947274	1.66675	2.66347	0.848138	32.1205	5.84673	340	6.38	14.22	2.98	69.9819	11.2486	12.2995	8.97207	11.4317	43.93	48.27	49.605	47.0917	0.265	0.61	0.535	0.486671	0.0103345	2018	1	1100.82	111.265	1121.78
NIA_LDS19_166A	NIA_LDS19_9	2019-10-16 15:27:09	44.36	15.31	78.5003	-12.0956	37.562	Mozambique	2112.91	4.86039	71.4263	0.380891	1643.93	3.03884	71.2047	0.059703	1633.14	1.10045	45.02	0.0593151	0.958485	1.66675	2.66347	0.848138	32.1205	5.84673	340	6.38	14.22	2.98	69.9819	11.2486	12.2995	8.97207	11.4317	43.93	48.27	49.605	47.0917	0.265	0.61	0.535	0.486671	0.0103345	2018	1	1100.82	111.265	1121.78
NIA_LDS19_166B	NIA_LDS19_9	2019-10-16 15:27:47	60.48	16.7	169.725	-12.0949	37.5625	Mozambique	1605.81	7.22903	104.253	0.348696	1136.84	5.40748	104.032	0.0275082	1536.04	2.6633	89.4597	0.0371703	0.916162	1.66675	2.66347	0.848138	32.1205	5.84673	340	6.38	14.22	2.98	69.9819	11.2486	12.2995	8.97207	11.4317	43.93	48.27	49.605	47.0917	0.265	0.61	0.535	0.486671	0.0103345	2018	1	1100.82	111.265	1121.78
NIA_LDS19_167A	NIA_LDS19_9	2019-10-16 15:30:05	52.56	13.93	120.406	-12.0951	37.5625	Mozambique	710.297	3.84109	32.3188	0.3103	241.32	2.01954	32.0972	-0.0108882	1455.09	4.43884	123.174	-0.0656574	0.882607	1.66675	2.66347	0.848138	32.1205	5.84673	340	6.38	14.22	2.98	69.9819	11.2486	12.2995	8.97207	11.4317	43.93	48.27	49.605	47.0917	0.265	0.61	0.535	0.486671	0.0103345	2018	1	1100.82	111.265	1121.78
NIA_LDS19_167B	NIA_LDS19_9	2019-10-16 15:30:43	49.83	13.17	106.191	-12.0948	37.5627	Mozambique	886.018	5.49082	56.2121	0.316378	417.041	3.66927	55.9905	-0.00480995	1451.02	4.65366	123.984	-0.0167365	0.881635	1.66675	2.66347	0.848138	32.1205	5.84673	340	6.38	14.22	2.98	69.9819	11.2486	12.2995	8.97207	11.4317	43.93	48.27	49.605	47.0917	0.265	0.61	0.535	0.486671	0.0103345	2018	1	1100.82	111.265	1121.78
NIA_LDS19_167C	NIA_LDS19_9	2019-10-16 15:31:32	45.64	13.42	85.7122	-12.0951	37.5616	Mozambique	1187.29	5.2367	62.6992	0.338183	718.313	3.41515	62.4775	0.0169948	1542.99	2.67411	85.4141	0.0365086	0.919982	1.66675	2.66347	0.848138	32.1205	5.84673	340	6.38	14.22	2.98	69.9819	11.2486	12.2995	8.97207	11.4317	43.93	48.27	49.605	47.0917	0.265	0.61	0.535	0.486671	0.0103345	2018	1	1100.82	111.265	1121.78
NIA_LDS19_168A	NIA_LDS19_9	2019-10-16 15:34:37	43.99	14.29	77.9398	-12.0951	37.5614	Mozambique	1071.01	3.62213	36.5677	0.337684	602.035	1.80058	36.3461	0.0164959	1596.65	1.74069	61.3483	0.0437514	0.943065	1.66675	2.66347	0.848138	32.1205	5.84673	340	6.38	14.22	2.98	69.9819	11.2486	12.2995	8.97207	11.4317	43.93	48.27	49.605	47.0917	0.265	0.61	0.535	0.486671	0.0103345	2018	1	1100.82	111.265	1121.78
NIA_LDS19_168B	NIA_LDS19_9	2019-10-16 15:35:15	45.75	14.73	84.8918	-12.0953	37.5611	Mozambique	800.063	3.45276	32.2342	0.316558	331.086	1.63121	32.0125	-0.00462988	1527.15	2.74266	93.9763	-0.021357	0.911835	1.66675	2.66347	0.848138	32.1205	5.84673	340	6.38	14.22	2.98	69.9819	11.2486	12.2995	8.97207	11.4317	43.93	48.27	49.605	47.0917	0.265	0.61	0.535	0.486671	0.0103345	2018	1	1100.82	111.265	1121.78
NIA_LDS19_168C	NIA_LDS19_9	2019-10-16 15:35:57	44.74	14.37	80.9429	-12.0954	37.5612	Mozambique	533.12	2.20257	7.51119	0.308955	64.1435	0.38102	7.28955	-0.0122332	1496.1	3.23948	108.209	-0.285349	0.897953	1.66675	2.66347	0.848138	32.1205	5.84673	340	6.38	14.22	2.98	69.9819	11.2486	12.2995	8.97207	11.4317	43.93	48.27	49.605	47.0917	0.265	0.61	0.535	0.486671	0.0103345	2018	1	1100.82	111.265	1121.78
NIA_LDS19_168D	NIA_LDS19_9	2019-10-16 15:36:35	44.2	14.32	78.7639	-12.0953	37.5611	Mozambique	831.998	3.41899	32.3595	0.319354	363.021	1.59745	32.1379	-0.00183375	1542.8	2.47472	86.9265	-0.00779377	0.918671	1.66675	2.66347	0.848138	32.1205	5.84673	340	6.38	14.22	2.98	69.9819	11.2486	12.2995	8.97207	11.4317	43.93	48.27	49.605	47.0917	0.265	0.61	0.535	0.486671	0.0103345	2018	1	1100.82	111.265	1121.78
NIA_LDS19_169A	NIA_LDS19_9	2019-10-16 15:39:56	42.8	15.93	71.8602	-12.0951	37.5612	Mozambique	944.169	3.56519	32.2749	0.323776	475.192	1.74364	32.0532	0.00258758	1580.64	2.11418	67.8567	0.00860771	0.936809	1.66675	2.66347	0.848138	32.1205	5.84673	340	6.38	14.22	2.98	69.9819	11.2486	12.2995	8.97207	11.4317	43.93	48.27	49.605	47.0917	0.265	0.61	0.535	0.486671	0.0103345	2018	1	1100.82	111.265	1121.78
NIA_LDS19_169B	NIA_LDS19_9	2019-10-16 15:40:35	43.62	15.94	74.9866	-12.0948	37.5611	Mozambique	1012.97	2.72909	24.5354	0.332597	543.997	0.907543	24.3137	0.0114091	1632.02	0.992466	46.4234	0.0342302	0.957218	1.66675	2.66347	0.848138	32.1205	5.84673	340	6.38	14.22	2.98	69.9819	11.2486	12.2995	8.97207	11.4317	43.93	48.27	49.605	47.0917	0.265	0.61	0.535	0.486671	0.0103345	2018	1	1100.82	111.265	1121.78
NIA_LDS19_170A	NIA_LDS19_9	2019-10-16 15:42:47	44.47	16.24	78.0805	-12.0952	37.5611	Mozambique	1059.38	3.64166	37.4465	0.404197	590.403	1.82011	37.2249	0.0830087	1591.64	1.78861	63.8686	0.223795	0.94069	1.66675	2.66347	0.848138	32.1205	5.84673	340	6.38	14.22	2.98	69.9819	11.2486	12.2995	8.97207	11.4317	43.93	48.27	49.605	47.0917	0.265	0.61	0.535	0.486671	0.0103345	2018	1	1100.82	111.265	1121.78
NIA_LDS19_170B	NIA_LDS19_9	2019-10-16 15:43:24	44.15	15.81	77.1943	-12.0952	37.5612	Mozambique	557.469	2.13971	7.71409	0.311842	88.4926	0.318164	7.49246	-0.0093463	1553.81	2.0364	83.7285	-0.16412	0.921941	1.66675	2.66347	0.848138	32.1205	5.84673	340	6.38	14.22	2.98	69.9819	11.2486	12.2995	8.97207	11.4317	43.93	48.27	49.605	47.0917	0.265	0.61	0.535	0.486671	0.0103345	2018	1	1100.82	111.265	1121.78
NIA_LDS19_170C	NIA_LDS19_9	2019-10-16 15:44:02	42.75	15.45	72.0819	-12.0955	37.5611	Mozambique	646.351	2.37247	13.7162	0.317909	177.375	0.550926	13.4946	-0.00327882	1570.46	1.77807	76.0416	-0.0290324	0.929299	1.66675	2.66347	0.848138	32.1205	5.84673	340	6.38	14.22	2.98	69.9819	11.2486	12.2995	8.97207	11.4317	43.93	48.27	49.605	47.0917	0.265	0.61	0.535	0.486671	0.0103345	2018	1	1100.82	111.265	1121.78
NIA_LDS19_170D	NIA_LDS19_9	2019-10-16 15:44:45	41.56	15.29	67.8466	-12.0957	37.5611	Mozambique	1075.1	3.5932	37.3478	0.340145	606.124	1.77165	37.1262	0.0189568	1595.65	1.70011	62.2034	0.049908	0.942283	1.66675	2.66347	0.848138	32.1205	5.84673	340	6.38	14.22	2.98	69.9819	11.2486	12.2995	8.97207	11.4317	43.93	48.27	49.605	47.0917	0.265	0.61	0.535	0.486671	0.0103345	2018	1	1100.82	111.265	1121.78
NIA_LDS19_171A	NIA_LDS19_9	2019-10-16 15:48:23	40.85	16.51	64.4075	-12.0955	37.561	Mozambique	552.434	2.45875	11.289	0.309955	83.457	0.637205	11.0674	-0.0112331	1459.69	4.06256	123.198	-0.196484	0.882915	1.66675	2.66347	0.848138	32.1205	5.84673	340	6.38	14.22	2.98	69.9819	11.2486	12.2995	8.97207	11.4317	43.93	48.27	49.605	47.0917	0.265	0.61	0.535	0.486671	0.0103345	2018	1	1100.82	111.265	1121.78
NIA_LDS19_171C	NIA_LDS19_9	2019-10-16 15:49:52	43.38	16.24	73.7928	-12.0951	37.5611	Mozambique	597.34	2.54922	15.2674	0.314512	128.363	0.727674	15.0458	-0.00667583	1492.53	3.08418	111.341	-0.0776278	0.895085	1.66675	2.66347	0.848138	32.1205	5.84673	340	6.38	14.22	2.98	69.9819	11.2486	12.2995	8.97207	11.4317	43.93	48.27	49.605	47.0917	0.265	0.61	0.535	0.486671	0.0103345	2018	1	1100.82	111.265	1121.78
NIA_LDS19_171D	NIA_LDS19_9	2019-10-16 15:50:29	41.61	16.05	67.4152	-12.0949	37.561	Mozambique	567.482	2.55647	14.8731	0.310994	98.505	0.734922	14.6514	-0.0101938	1438.78	3.91289	136.199	-0.148903	0.870521	1.66675	2.66347	0.848138	32.1205	5.84673	340	6.38	14.22	2.98	69.9819	11.2486	12.2995	8.97207	11.4317	43.93	48.27	49.605	47.0917	0.265	0.61	0.535	0.486671	0.0103345	2018	1	1100.82	111.265	1121.78
NIA_LDS19_172A	NIA_LDS19_9	2019-10-16 15:52:48	40.72	16.94	63.6359	-12.0951	37.5611	Mozambique	695.631	3.18066	23.4366	0.315943	226.654	1.35911	23.2149	-0.005245	1512.16	3.30529	98.5729	-0.0349952	0.907092	1.66675	2.66347	0.848138	32.1205	5.84673	340	6.38	14.22	2.98	69.9819	11.2486	12.2995	8.97207	11.4317	43.93	48.27	49.605	47.0917	0.265	0.61	0.535	0.486671	0.0103345	2018	1	1100.82	111.265	1121.78
NIA_LDS19_172B	NIA_LDS19_9	2019-10-16 15:53:27	43.17	17.11	72.2323	-12.0951	37.561	Mozambique	1182.68	4.52703	53.7366	0.343086	713.703	2.70548	53.515	0.021898	1567.81	2.16641	74.8183	0.0481071	0.930248	1.66675	2.66347	0.848138	32.1205	5.84673	340	6.38	14.22	2.98	69.9819	11.2486	12.2995	8.97207	11.4317	43.93	48.27	49.605	47.0917	0.265	0.61	0.535	0.486671	0.0103345	2018	1	1100.82	111.265	1121.78
NIA_LDS19_172C	NIA_LDS19_9	2019-10-16 15:54:32	46.88	17.21	87.3071	-12.0952	37.561	Mozambique	1113.15	4.31441	49.7449	0.404309	644.173	2.49286	49.5233	0.0831211	1564.3	2.20666	76.5391	0.201864	0.92861	1.66675	2.66347	0.848138	32.1205	5.84673	340	6.38	14.22	2.98	69.9819	11.2486	12.2995	8.97207	11.4317	43.93	48.27	49.605	47.0917	0.265	0.61	0.535	0.486671	0.0103345	2018	1	1100.82	111.265	1121.78
NIA_LDS19_173A	NIA_LDS19_9	2019-10-16 15:57:20	45.39	16.86	81.2591	-12.0951	37.5611	Mozambique	768.715	2.93993	21.4737	0.318963	299.738	1.11838	21.2521	-0.00222513	1574.7	2.14174	71.058	-0.0116907	0.933792	1.66675	2.66347	0.848138	32.1205	5.84673	340	6.38	14.22	2.98	69.9819	11.2486	12.2995	8.97207	11.4317	43.93	48.27	49.605	47.0917	0.265	0.61	0.535	0.486671	0.0103345	2018	1	1100.82	111.265	1121.78
NIA_LDS19_173B	NIA_LDS19_9	2019-10-16 15:57:57	46.27	16.25	85.6219	-12.0951	37.5609	Mozambique	1408.33	5.39087	68.1661	0.344897	939.348	3.56932	67.9445	0.0237089	1571.97	2.17733	72.365	0.0396788	0.932547	1.66675	2.66347	0.848138	32.1205	5.84673	340	6.38	14.22	2.98	69.9819	11.2486	12.2995	8.97207	11.4317	43.93	48.27	49.605	47.0917	0.265	0.61	0.535	0.486671	0.0103345	2018	1	1100.82	111.265	1121.78
NIA_LDS19_173C	NIA_LDS19_9	2019-10-16 15:58:35	47.9	16.41	92.8164	-12.0951	37.5609	Mozambique	1288.95	5.6401	70.4886	0.34086	819.972	3.81855	70.2669	0.0196723	1545.57	2.62367	84.2943	0.037083	0.92107	1.66675	2.66347	0.848138	32.1205	5.84673	340	6.38	14.22	2.98	69.9819	11.2486	12.2995	8.97207	11.4317	43.93	48.27	49.605	47.0917	0.265	0.61	0.535	0.486671	0.0103345	2018	1	1100.82	111.265	1121.78
NIA_LDS19_174A	NIA_LDS19_9	2019-10-16 16:01:09	44.5	14.4	79.9194	-12.0951	37.5609	Mozambique	887.221	3.65173	39.6682	0.327267	418.245	1.83019	39.4465	0.00607878	1534.11	2.44705	92.0857	0.0222983	0.913814	1.66675	2.66347	0.848138	32.1205	5.84673	340	6.38	14.22	2.98	69.9819	11.2486	12.2995	8.97207	11.4317	43.93	48.27	49.605	47.0917	0.265	0.61	0.535	0.486671	0.0103345	2018	1	1100.82	111.265	1121.78
NIA_LDS19_174B	NIA_LDS19_9	2019-10-16 16:01:51	45.12	14.25	82.6566	-12.095	37.5607	Mozambique	1019.25	2.21118	13.5925	0.330305	550.274	0.389636	13.3709	0.00911708	1674.86	0.432296	25.9011	0.0277515	0.976278	1.66675	2.66347	0.848138	32.1205	5.84673	340	6.38	14.22	2.98	69.9819	11.2486	12.2995	8.97207	11.4317	43.93	48.27	49.605	47.0917	0.265	0.61	0.535	0.486671	0.0103345	2018	1	1100.82	111.265	1121.78
NIA_LDS19_174C	NIA_LDS19_9	2019-10-16 16:02:28	45.88	14.31	85.8789	-12.0951	37.5608	Mozambique	1271.65	3.64025	42.3583	0.340407	802.67	1.81871	42.1367	0.0192188	1614.64	1.33359	53.9455	0.0386628	0.950123	1.66675	2.66347	0.848138	32.1205	5.84673	340	6.38	14.22	2.98	69.9819	11.2486	12.2995	8.97207	11.4317	43.93	48.27	49.605	47.0917	0.265	0.61	0.535	0.486671	0.0103345	2018	1	1100.82	111.265	1121.78
NIA_LDS19_175A	NIA_LDS19_9	2019-10-16 16:05:06	45.34	14.63	83.225	-12.095	37.5607	Mozambique	1014.64	2.74881	25.4822	0.333137	545.666	0.927268	25.2606	0.0119485	1629.06	1.0091	47.9965	0.0356739	0.955755	1.66675	2.66347	0.848138	32.1205	5.84673	340	6.38	14.22	2.98	69.9819	11.2486	12.2995	8.97207	11.4317	43.93	48.27	49.605	47.0917	0.265	0.61	0.535	0.486671	0.0103345	2018	1	1100.82	111.265	1121.78
NIA_LDS19_175B	NIA_LDS19_9	2019-10-16 16:05:43	45.17	14.63	82.5019	-12.0949	37.5606	Mozambique	1215.17	4.29605	51.587	0.347358	746.193	2.4745	51.3654	0.0261694	1580.71	1.91078	69.2514	0.0554402	0.935597	1.66675	2.66347	0.848138	32.1205	5.84673	340	6.38	14.22	2.98	69.9819	11.2486	12.2995	8.97207	11.4317	43.93	48.27	49.605	47.0917	0.265	0.61	0.535	0.486671	0.0103345	2018	1	1100.82	111.265	1121.78
NIA_LDS19_175C	NIA_LDS19_9	2019-10-16 16:06:25	47.53	14.5	93.1816	-12.095	37.5606	Mozambique	1412.73	4.381	54.9684	0.36107	943.751	2.55946	54.7467	0.0398818	1602.41	1.58411	59.1605	0.0677206	0.945171	1.66675	2.66347	0.848138	32.1205	5.84673	340	6.38	14.22	2.98	69.9819	11.2486	12.2995	8.97207	11.4317	43.93	48.27	49.605	47.0917	0.265	0.61	0.535	0.486671	0.0103345	2018	1	1100.82	111.265	1121.78
NIA_LDS19_176A	NIA_LDS19_9	2019-10-16 16:08:48	46.63	14.04	89.5064	-12.0948	37.5607	Mozambique	1357.18	5.67948	68.6885	0.346243	888.201	3.85793	68.4669	0.0250544	1560.96	2.47147	76.5803	0.0440346	0.928432	1.66675	2.66347	0.848138	32.1205	5.84673	340	6.38	14.22	2.98	69.9819	11.2486	12.2995	8.97207	11.4317	43.93	48.27	49.605	47.0917	0.265	0.61	0.535	0.486671	0.0103345	2018	1	1100.82	111.265	1121.78
NIA_LDS19_176B	NIA_LDS19_9	2019-10-16 16:09:25	49.39	14.53	102.263	-12.0943	37.5604	Mozambique	1252.32	5.37101	64.1865	0.350955	783.347	3.54947	63.9649	0.0297666	1552.62	2.56445	80.6879	0.0590023	0.924509	1.66675	2.66347	0.848138	32.1205	5.84673	340	6.38	14.22	2.98	69.9819	11.2486	12.2995	8.97207	11.4317	43.93	48.27	49.605	47.0917	0.265	0.61	0.535	0.486671	0.0103345	2018	1	1100.82	111.265	1121.78
NIA_LDS19_176C	NIA_LDS19_9	2019-10-16 16:10:06	47.08	14	0	-12.0941	37.5602	Mozambique	1002.49	3.71342	38.0374	0.331561	533.517	1.89188	37.8158	0.0103727	1575.93	2.03705	71.0917	0.0306414	0.933811	1.66675	2.66347	0.848138	32.1205	5.84673	340	6.38	14.22	2.98	69.9819	11.2486	12.2995	8.97207	11.4317	43.93	48.27	49.605	47.0917	0.265	0.61	0.535	0.486671	0.0103345	2018	1	1100.82	111.265	1121.78
NIA_LDS19_176D	NIA_LDS19_9	2019-10-16 16:10:43	46.1	13.8	87.366	-12.0942	37.5603	Mozambique	871.145	4.16654	38.8208	0.332591	402.169	2.34499	38.5992	0.0114028	1522.74	3.23653	93.0148	0.0431775	0.912427	1.66675	2.66347	0.848138	32.1205	5.84673	340	6.38	14.22	2.98	69.9819	11.2486	12.2995	8.97207	11.4317	43.93	48.27	49.605	47.0917	0.265	0.61	0.535	0.486671	0.0103345	2018	1	1100.82	111.265	1121.78
NIA_LDS19_cal10	NIA_LDS19_10	calibration						Mozambique	4706.27	14.8885	99.5109	1.11063	4217.6	13.0613	99.1601	0.801027	1585.28	1.78956	23.7211	0.301105	0.977029
NIA_LDS19_177A	NIA_LDS19_10	2019-10-17 14:15:14	37.35	19.45	51.5025	-12.0811	37.5609	Mozambique	1052.36	5.26843	59.3347	0.350282	563.684	3.44118	58.9838	0.0406789	1473.74	3.27955	98.1468	0.106362	0.905272	1.39561	2.44345	0.320213	33.6915	4.33047	520	7.02	13.59	2.58	65.3996	4.34451	3.76314	3.68555	3.95306	44.06	47.105	46.21	46.0144	0.265	0.64	0.495	0.503009	0.0109316	2018	1	1100.82	111.265	1121.78
NIA_LDS19_177B	NIA_LDS19_10	2019-10-17 14:15:17	37.32	19.45	51.4186	-12.0811	37.5609	Mozambique	1228.06	6.47021	75.3633	0.4512	739.382	4.64297	75.0124	0.141597	1477.31	3.38159	95.3881	0.282936	0.907892	1.39561	2.44345	0.320213	33.6915	4.33047	520	7.02	13.59	2.58	65.3996	4.34451	3.76314	3.68555	3.95306	44.06	47.105	46.21	46.0144	0.265	0.64	0.495	0.503009	0.0109316	2018	1	1100.82	111.265	1121.78
NIA_LDS19_177C	NIA_LDS19_10	2019-10-17 14:15:52	36.55	19.14	49.4955	-12.0811	37.5608	Mozambique	1353.66	6.64258	87.8782	0.370611	864.988	4.81533	87.5273	0.061008	1481.86	3.00707	95.4328	0.104523	0.908109	1.39561	2.44345	0.320213	33.6915	4.33047	520	7.02	13.59	2.58	65.3996	4.34451	3.76314	3.68555	3.95306	44.06	47.105	46.21	46.0144	0.265	0.64	0.495	0.503009	0.0109316	2018	1	1100.82	111.265	1121.78
NIA_LDS19_178A	NIA_LDS19_10	2019-10-17 14:21:58	44.58	22.4	72.7499	-12.0812	37.5609	Mozambique	977.168	6.0245	74.7988	0.344602	488.493	4.19725	74.4479	0.0349994	1395.19	4.36979	135.327	0.0999688	0.867752	1.39561	2.44345	0.320213	33.6915	4.33047	520	7.02	13.59	2.58	65.3996	4.34451	3.76314	3.68555	3.95306	44.06	47.105	46.21	46.0144	0.265	0.64	0.495	0.503009	0.0109316	2018	1	1100.82	111.265	1121.78
NIA_LDS19_178B	NIA_LDS19_10	2019-10-17 14:22:41	45.53	21.55	77.2274	-12.0812	37.5609	Mozambique	1386.43	4.14173	28.5857	0.465563	897.752	2.31449	28.2348	0.155961	1610.93	1.5139	32.2449	0.279875	0.969508	1.39561	2.44345	0.320213	33.6915	4.33047	520	7.02	13.59	2.58	65.3996	4.34451	3.76314	3.68555	3.95306	44.06	47.105	46.21	46.0144	0.265	0.64	0.495	0.503009	0.0109316	2018	1	1100.82	111.265	1121.78
NIA_LDS19_178C	NIA_LDS19_10	2019-10-17 14:23:30	45.69	20.81	78.5971	-12.0812	37.5609	Mozambique	1529.75	6.32799	83.8596	0.381438	1041.08	4.50075	83.5087	0.0718356	1520.58	2.39624	77.6273	0.104929	0.925743	1.39561	2.44345	0.320213	33.6915	4.33047	520	7.02	13.59	2.58	65.3996	4.34451	3.76314	3.68555	3.95306	44.06	47.105	46.21	46.0144	0.265	0.64	0.495	0.503009	0.0109316	2018	1	1100.82	111.265	1121.78
NIA_LDS19_179B	NIA_LDS19_10	2019-10-17 14:27:47	47.05	15.2	90.2011	-12.0809	37.5605	Mozambique	622.954	2.55046	14.021	0.331231	134.28	0.723223	13.6701	0.0216281	1482.03	2.90964	96.0233	0.238723	0.907603	1.39561	2.44345	0.320213	33.6915	4.33047	520	7.02	13.59	2.58	65.3996	4.34451	3.76314	3.68555	3.95306	44.06	47.105	46.21	46.0144	0.265	0.64	0.495	0.503009	0.0109316	2018	1	1100.82	111.265	1121.78
NIA_LDS19_179C	NIA_LDS19_10	2019-10-17 14:28:25	47.76	15.08	93.6301	-12.0806	37.5606	Mozambique	665.215	2.62859	15.2482	0.33303	176.54	0.801349	14.8973	0.023427	1512.91	2.50329	81.252	0.200778	0.922182	1.39561	2.44345	0.320213	33.6915	4.33047	520	7.02	13.59	2.58	65.3996	4.34451	3.76314	3.68555	3.95306	44.06	47.105	46.21	46.0144	0.265	0.64	0.495	0.503009	0.0109316	2018	1	1100.82	111.265	1121.78
NIA_LDS19_179D	NIA_LDS19_10	2019-10-17 14:29:00	47.9	14.88	94.5153	-12.0805	37.5606	Mozambique	659.083	3.23889	69.4314	0.343731	170.408	1.41164	69.0805	0.0341289	1132.35	3.41929	292.148	0.226799	0.711549	1.39561	2.44345	0.320213	33.6915	4.33047	520	7.02	13.59	2.58	65.3996	4.34451	3.76314	3.68555	3.95306	44.06	47.105	46.21	46.0144	0.265	0.64	0.495	0.503009	0.0109316	2018	1	1100.82	111.265	1121.78
NIA_LDS19_180A	NIA_LDS19_10	2019-10-17 14:31:12	46.35	14.47	87.7988	-12.0806	37.561	Mozambique	1431.21	7.9413	108.498	0.3715	942.536	6.11405	108.147	0.0618976	1457.22	3.44569	106.414	0.095704	0.89707	1.39561	2.44345	0.320213	33.6915	4.33047	520	7.02	13.59	2.58	65.3996	4.34451	3.76314	3.68555	3.95306	44.06	47.105	46.21	46.0144	0.265	0.64	0.495	0.503009	0.0109316	2018	1	1100.82	111.265	1121.78
NIA_LDS19_180B	NIA_LDS19_10	2019-10-17 14:31:56	43.17	14.21	74.7595	-12.0805	37.5611	Mozambique	1080.91	4.69831	50.4662	0.347185	592.235	2.87107	50.1153	0.037582	1510.67	2.66956	81.3585	0.0958704	0.921981	1.39561	2.44345	0.320213	33.6915	4.33047	520	7.02	13.59	2.58	65.3996	4.34451	3.76314	3.68555	3.95306	44.06	47.105	46.21	46.0144	0.265	0.64	0.495	0.503009	0.0109316	2018	1	1100.82	111.265	1121.78
NIA_LDS19_180C	NIA_LDS19_10	2019-10-17 14:32:34	41.23	14.38	67.3917	-12.0806	37.5611	Mozambique	786.096	2.40928	13.6946	0.335176	297.421	0.582039	13.3437	0.0255731	1592.44	1.13596	45.4701	0.136932	0.957062	1.39561	2.44345	0.320213	33.6915	4.33047	520	7.02	13.59	2.58	65.3996	4.34451	3.76314	3.68555	3.95306	44.06	47.105	46.21	46.0144	0.265	0.64	0.495	0.503009	0.0109316	2018	1	1100.82	111.265	1121.78
NIA_LDS19_180D	NIA_LDS19_10	2019-10-17 14:33:13	40.24	14.74	63.6772	-12.0805	37.5609	Mozambique	1437.97	3.38897	40.5424	0.365384	949.298	1.56173	40.1915	0.0557815	1598.81	0.958784	43.0809	0.0939536	0.959382	1.39561	2.44345	0.320213	33.6915	4.33047	520	7.02	13.59	2.58	65.3996	4.34451	3.76314	3.68555	3.95306	44.06	47.105	46.21	46.0144	0.265	0.64	0.495	0.503009	0.0109316	2018	1	1100.82	111.265	1121.78
NIA_LDS19_181A	NIA_LDS19_10	2019-10-17 14:36:45	40.14	17.23	61.4894	-12.0809	37.5605	Mozambique	1713.13	6.92189	92.435	0.397949	1224.46	5.09465	92.0841	0.0883461	1529.28	2.31942	73.1958	0.110347	0.930056	1.39561	2.44345	0.320213	33.6915	4.33047	520	7.02	13.59	2.58	65.3996	4.34451	3.76314	3.68555	3.95306	44.06	47.105	46.21	46.0144	0.265	0.64	0.495	0.503009	0.0109316	2018	1	1100.82	111.265	1121.78
NIA_LDS19_181B	NIA_LDS19_10	2019-10-17 14:37:23	41.59	17.54	66.149	-12.081	37.5605	Mozambique	1610.66	3.95781	49.502	0.378831	1121.99	2.13057	49.1511	0.0692288	1594.61	1.10378	44.4587	0.0983971	0.958031	1.39561	2.44345	0.320213	33.6915	4.33047	520	7.02	13.59	2.58	65.3996	4.34451	3.76314	3.68555	3.95306	44.06	47.105	46.21	46.0144	0.265	0.64	0.495	0.503009	0.0109316	2018	1	1100.82	111.265	1121.78
NIA_LDS19_181C	NIA_LDS19_10	2019-10-17 14:38:26	42.1	16.95	68.4333	-12.0807	37.5603	Mozambique	1488.3	5.41345	74.8414	0.382851	999.623	3.58621	74.4905	0.0732487	1533.93	2.00598	72.7492	0.112409	0.930649	1.39561	2.44345	0.320213	33.6915	4.33047	520	7.02	13.59	2.58	65.3996	4.34451	3.76314	3.68555	3.95306	44.06	47.105	46.21	46.0144	0.265	0.64	0.495	0.503009	0.0109316	2018	1	1100.82	111.265	1121.78
NIA_LDS19_182A	NIA_LDS19_10	2019-10-17 14:41:18	45.01	17.4	79.1713	-12.0807	37.56	Mozambique	1245.09	4.44944	60.8224	0.360794	756.415	2.6222	60.4715	0.0511914	1526.29	1.9287	77.6579	0.103301	0.925973	1.39561	2.44345	0.320213	33.6915	4.33047	520	7.02	13.59	2.58	65.3996	4.34451	3.76314	3.68555	3.95306	44.06	47.105	46.21	46.0144	0.265	0.64	0.495	0.503009	0.0109316	2018	1	1100.82	111.265	1121.78
NIA_LDS19_182B	NIA_LDS19_10	2019-10-17 14:41:56	44.52	16.99	77.5813	-12.0802	37.5601	Mozambique	1076.27	2.49343	19.3734	0.345084	587.595	0.666189	19.0225	0.0354813	1619.39	0.669256	33.3655	0.097792	0.968642	1.39561	2.44345	0.320213	33.6915	4.33047	520	7.02	13.59	2.58	65.3996	4.34451	3.76314	3.68555	3.95306	44.06	47.105	46.21	46.0144	0.265	0.64	0.495	0.503009	0.0109316	2018	1	1100.82	111.265	1121.78
NIA_LDS19_182C	NIA_LDS19_10	2019-10-17 14:42:34	46.05	16.91	83.9993	-12.0802	37.5603	Mozambique	1670.82	3.29917	19.6462	0.34484	1182.15	1.47193	19.2953	0.0352372	1646.89	0.747483	17.1082	0.0490936	0.98394	1.39561	2.44345	0.320213	33.6915	4.33047	520	7.02	13.59	2.58	65.3996	4.34451	3.76314	3.68555	3.95306	44.06	47.105	46.21	46.0144	0.265	0.64	0.495	0.503009	0.0109316	2018	1	1100.82	111.265	1121.78
NIA_LDS19_183B	NIA_LDS19_10	2019-10-17 14:45:40	48.11	16.27	93.96	-12.0801	37.5604	Mozambique	1136.6	4.12296	49.5906	0.36209	647.929	2.29572	49.2397	0.0524869	1531.92	1.97855	74.0936	0.124105	0.929372	1.39561	2.44345	0.320213	33.6915	4.33047	520	7.02	13.59	2.58	65.3996	4.34451	3.76314	3.68555	3.95306	44.06	47.105	46.21	46.0144	0.265	0.64	0.495	0.503009	0.0109316	2018	1	1100.82	111.265	1121.78
NIA_LDS19_183C	NIA_LDS19_10	2019-10-17 14:46:17	46.38	15.8	86.5657	-12.08	37.5603	Mozambique	948.303	3.16182	28.9903	0.353508	459.628	1.33457	28.6394	0.0439054	1557.57	1.64856	61.768	0.148795	0.941345	1.39561	2.44345	0.320213	33.6915	4.33047	520	7.02	13.59	2.58	65.3996	4.34451	3.76314	3.68555	3.95306	44.06	47.105	46.21	46.0144	0.265	0.64	0.495	0.503009	0.0109316	2018	1	1100.82	111.265	1121.78
NIA_LDS19_183D	NIA_LDS19_10	2019-10-17 14:46:52	46.6	15.37	87.9872	-12.08	37.5604	Mozambique	1603.42	5.96071	80.4327	0.388118	1114.75	4.13347	80.0818	0.0785155	1537.35	2.07794	70.2892	0.108288	0.932976	1.39561	2.44345	0.320213	33.6915	4.33047	520	7.02	13.59	2.58	65.3996	4.34451	3.76314	3.68555	3.95306	44.06	47.105	46.21	46.0144	0.265	0.64	0.495	0.503009	0.0109316	2018	1	1100.82	111.265	1121.78
NIA_LDS19_184A	NIA_LDS19_10	2019-10-17 14:48:32	48.05	15.56	94.4711	-12.0803	37.5597	Mozambique	1717.6	4.84325	66.0563	0.382743	1228.93	3.01601	65.7054	0.0731405	1574.85	1.40886	53.5885	0.0937349	0.949248	1.39561	2.44345	0.320213	33.6915	4.33047	520	7.02	13.59	2.58	65.3996	4.34451	3.76314	3.68555	3.95306	44.06	47.105	46.21	46.0144	0.265	0.64	0.495	0.503009	0.0109316	2018	1	1100.82	111.265	1121.78
NIA_LDS19_184B	NIA_LDS19_10	2019-10-17 14:49:11	45.94	15.22	85.2277	-12.0801	37.5605	Mozambique	805.013	4.14199	45.3641	0.338481	316.338	2.31475	45.0132	0.0288788	1415.09	3.77449	128.154	0.129194	0.875431	1.39561	2.44345	0.320213	33.6915	4.33047	520	7.02	13.59	2.58	65.3996	4.34451	3.76314	3.68555	3.95306	44.06	47.105	46.21	46.0144	0.265	0.64	0.495	0.503009	0.0109316	2018	1	1100.82	111.265	1121.78
NIA_LDS19_184C	NIA_LDS19_10	2019-10-17 14:49:49	44.95	15.19	81.0391	-12.0801	37.5606	Mozambique	874.222	3.98397	40.8131	0.343052	385.547	2.15673	40.4622	0.0334496	1476.27	3.01026	98.604	0.128088	0.90502	1.39561	2.44345	0.320213	33.6915	4.33047	520	7.02	13.59	2.58	65.3996	4.34451	3.76314	3.68555	3.95306	44.06	47.105	46.21	46.0144	0.265	0.64	0.495	0.503009	0.0109316	2018	1	1100.82	111.265	1121.78
NIA_LDS19_185A	NIA_LDS19_10	2019-10-17 14:53:03	44.68	15.56	79.5716	-12.0799	37.5603	Mozambique	1681.65	4.82224	62.5275	0.400373	1192.97	2.995	62.1766	0.0907708	1576.69	1.44289	52.2999	0.119975	0.950463	1.39561	2.44345	0.320213	33.6915	4.33047	520	7.02	13.59	2.58	65.3996	4.34451	3.76314	3.68555	3.95306	44.06	47.105	46.21	46.0144	0.265	0.64	0.495	0.503009	0.0109316	2018	1	1100.82	111.265	1121.78
NIA_LDS19_185B	NIA_LDS19_10	2019-10-17 14:53:42	51.68	15.71	112.947	-12.0798	37.5603	Mozambique	1503.39	7.16203	98.3156	0.38575	1014.71	5.33479	97.9647	0.0761473	1490.46	2.85638	91.5811	0.111857	0.911956	1.39561	2.44345	0.320213	33.6915	4.33047	520	7.02	13.59	2.58	65.3996	4.34451	3.76314	3.68555	3.95306	44.06	47.105	46.21	46.0144	0.265	0.64	0.495	0.503009	0.0109316	2018	1	1100.82	111.265	1121.78
NIA_LDS19_185C	NIA_LDS19_10	2019-10-17 14:54:19	50.04	14.73	105.376	-12.0797	37.5604	Mozambique	798.783	4.57285	45.8364	0.336895	310.108	2.74561	45.4855	0.0272923	1401.22	4.52224	130.805	0.123329	0.872086	1.39561	2.44345	0.320213	33.6915	4.33047	520	7.02	13.59	2.58	65.3996	4.34451	3.76314	3.68555	3.95306	44.06	47.105	46.21	46.0144	0.265	0.64	0.495	0.503009	0.0109316	2018	1	1100.82	111.265	1121.78
NIA_LDS19_186A	NIA_LDS19_10	2019-10-17 14:56:51	43.75	14.98	76.3565	-12.0794	37.5603	Mozambique	818.546	3.18933	24.1529	0.343568	329.871	1.36209	23.802	0.033965	1534.21	2.30922	70.4549	0.15798	0.9327	1.39561	2.44345	0.320213	33.6915	4.33047	520	7.02	13.59	2.58	65.3996	4.34451	3.76314	3.68555	3.95306	44.06	47.105	46.21	46.0144	0.265	0.64	0.495	0.503009	0.0109316	2018	1	1100.82	111.265	1121.78
NIA_LDS19_186B	NIA_LDS19_10	2019-10-17 14:57:33	50.37	16.09	105.406	-12.0789	37.5602	Mozambique	1582.65	3.34214	39.3391	0.368801	1093.98	1.5149	38.9882	0.0591981	1612.01	0.8137	36.5638	0.0872364	0.965587	1.39561	2.44345	0.320213	33.6915	4.33047	520	7.02	13.59	2.58	65.3996	4.34451	3.76314	3.68555	3.95306	44.06	47.105	46.21	46.0144	0.265	0.64	0.495	0.503009	0.0109316	2018	1	1100.82	111.265	1121.78
NIA_LDS19_186C	NIA_LDS19_10	2019-10-17 14:58:11	51.87	16.01	113.598	-12.0789	37.5602	Mozambique	1513.16	3.88205	47.301	0.375611	1024.49	2.05481	46.9501	0.0660082	1590.5	1.16284	46.3895	0.102484	0.95618	1.39561	2.44345	0.320213	33.6915	4.33047	520	7.02	13.59	2.58	65.3996	4.34451	3.76314	3.68555	3.95306	44.06	47.105	46.21	46.0144	0.265	0.64	0.495	0.503009	0.0109316	2018	1	1100.82	111.265	1121.78
NIA_LDS19_186D	NIA_LDS19_10	2019-10-17 14:58:46	49.21	14.88	100.933	-12.0789	37.56	Mozambique	1871.06	7.16927	97.5822	0.40407	1382.39	5.34203	97.2313	0.0944677	1538.72	2.16748	68.8799	0.105158	0.934286	1.39561	2.44345	0.320213	33.6915	4.33047	520	7.02	13.59	2.58	65.3996	4.34451	3.76314	3.68555	3.95306	44.06	47.105	46.21	46.0144	0.265	0.64	0.495	0.503009	0.0109316	2018	1	1100.82	111.265	1121.78
NIA_LDS19_187A	NIA_LDS19_10	2019-10-17 15:00:30	45.12	15.16	81.7794	-12.0793	37.5605	Mozambique	764.204	5.64776	59.0777	0.335898	275.529	3.82052	58.7268	0.0262953	1297.07	6.55601	175.95	0.123795	0.824306	1.39561	2.44345	0.320213	33.6915	4.33047	520	7.02	13.59	2.58	65.3996	4.34451	3.76314	3.68555	3.95306	44.06	47.105	46.21	46.0144	0.265	0.64	0.495	0.503009	0.0109316	2018	1	1100.82	111.265	1121.78
NIA_LDS19_187B	NIA_LDS19_10	2019-10-17 15:01:11	44.31	15.42	78.1961	-12.079	37.5606	Mozambique	669.21	4.39813	42.8674	0.331774	180.535	2.57088	42.5165	0.0221711	1271.06	6.59793	190.511	0.156107	0.809387	1.39561	2.44345	0.320213	33.6915	4.33047	520	7.02	13.59	2.58	65.3996	4.34451	3.76314	3.68555	3.95306	44.06	47.105	46.21	46.0144	0.265	0.64	0.495	0.503009	0.0109316	2018	1	1100.82	111.265	1121.78
NIA_LDS19_187C	NIA_LDS19_10	2019-10-17 15:01:48	45.69	16.04	83.3314	-12.0788	37.561	Mozambique	967.8	4.98793	56.3893	0.350485	479.125	3.16068	56.0384	0.0408827	1453.49	3.49514	108.195	0.124032	0.895287	1.39561	2.44345	0.320213	33.6915	4.33047	520	7.02	13.59	2.58	65.3996	4.34451	3.76314	3.68555	3.95306	44.06	47.105	46.21	46.0144	0.265	0.64	0.495	0.503009	0.0109316	2018	1	1100.82	111.265	1121.78
NIA_LDS19_187D	NIA_LDS19_10	2019-10-17 15:02:25	47.42	16.07	90.9635	-12.0787	37.5608	Mozambique	792.333	4.64547	49.2	0.338171	303.658	2.81823	48.8491	0.0285687	1380.87	4.67158	141.378	0.129923	0.861424	1.39561	2.44345	0.320213	33.6915	4.33047	520	7.02	13.59	2.58	65.3996	4.34451	3.76314	3.68555	3.95306	44.06	47.105	46.21	46.0144	0.265	0.64	0.495	0.503009	0.0109316	2018	1	1100.82	111.265	1121.78
[truncated: 3,549 more rows]
[truncated: 29 more columns]

## Sheet: Background data
	Fire	Date	BG_CO2	BG_CO	BG_CH4	BG_N2O	Rh_BG	T_BG
NIA_EDS19_1	NIA_EDS19_1	2019-06-23	448.46	0.51	1.81	0.36	24.74	32.26
NIA_EDS19_3	NIA_EDS19_3	2019-06-23	429.61	0.17	1.8	0.38	37.34	26.36
NIA_EDS19_4	NIA_EDS19_4	2019-06-23	439.08	0.28	1.81	0.37	47.9	24.85
NIA_EDS19_5	NIA_EDS19_5	2019-06-25	462.3	0.21	1.83	0.35	25.79	35.75
[truncated: 125 more rows]

## Sheet: Profiles
		field entry									Location		LGR		AERIS						Emissions (ppm)				mast_EF				bag_EF					Time delta			Aerosol_EF
[truncated: 49 more rows]

[truncated: 1 more sheets: constants]
