# Supplementary material for: Dynamic savanna burning emission factors based on satellite data using a machine learning approach
Source: Copernicus journal article supplement (doi:10.5194/esd-14-1039-2023), 2023-10-10
Supplement: Supplementary file 1 [file esd-14-1039-2023-supplement.zip]

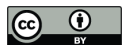

*Supplement of*

## **Dynamic savanna burning emission factors based on satellite data using a machine learning approach**

**Roland Vernooij et al.**

*Correspondence to:* Roland Vernooij (r.vernooi@vu.nl)

- esd-14-1039-2023-supplement-title-page.pdf
- EF\_Database\_vernooi\_revised.xlsx

The copyright of individual parts of the supplement might differ from the article licence.
